# Supplementary material for: A molecular shuttle that operates inside a metal–organic framework
Source: Springer Nature journal article supplement (doi:10.1038/nchem.2258), 2015-05-04
Supplement: 41557_2015_BFnchem2258_MOESM3_ESM.cif [file 41557_2015_BFnchem2258_MOESM3_ESM.cif]

data_global

#send to: deposit@ccdc.cam.ac.uk 
_publ_contact_author
;
 Stephen J. Loeb
 Department of Chemistry and Biochemistry
 University of Windsor
 Windsor, Ontario, Canada
 N9B 3P4
 
;
_publ_contact_author_phone '+ 519 253-3000 ext 3529'
_publ_contact_author_fax '+ 519 973-7098 '
_publ_contact_author_email 'loeb@uwindsor.ca'
_publ_requested_journal 'Nature Chemistry'
_publ_requested_coeditor_name ?
_publ_contact_letter
;
 This structure is part of a study on the use of 
 [2]rotaxane molecular shuttles as linkers in MOFs
 and the demosntration of their trranlational motion
 in the solid state
;
_publ_section_title
;
 A Molecular Shuttle that Operates Inside a
 Metal-Organic Framework
;

loop_
_publ_author_name
_publ_author_address
 'Loeb, Stephen J.'
;
 Department of Chemistry and Biochemistry
 University of Windsor
 Windsor, Ontario, Canada
 N9B 3P4
;  
data_MIM_LINKER_4
_audit_creation_date              2014-09-02
_audit_creation_method            SHELXL-2013
_shelxl_version_number            2013-4
_publ_contact_author_address      ?
_publ_contact_author_email        ?
_publ_contact_author_name         ''
_publ_contact_author_phone        ?
_publ_section_references
;
Dolomanov, O.V., Bourhis, L.J., Gildea, R.J, Howard, J.A.K. & Puschmann, H.
 (2009), J. Appl. Cryst. 42, 339-341.

Sheldrick, G.M. (2008). Acta Cryst. A64, 112-122.
;
_chemical_name_common             ?
_chemical_name_systematic
;
 ?
;
_chemical_formula_moiety          'C52 H38 N4 O8, C16 H32 O8, C4 H10 O2'
_chemical_formula_sum             'C72 H80 N4 O18'
_chemical_formula_weight          1289.40
_chemical_melting_point           ?
loop_
  _atom_type_symbol
  _atom_type_description
  _atom_type_scat_dispersion_real
  _atom_type_scat_dispersion_imag
  _atom_type_scat_source
 'C' 'C' 0.0181 0.0091 'International Tables Vol C Tables 4.2.6.8 and 6.1.1.4'
 'H' 'H' 0.0000 0.0000 'International Tables Vol C Tables 4.2.6.8 and 6.1.1.4'
 'N' 'N' 0.0311 0.0180 'International Tables Vol C Tables 4.2.6.8 and 6.1.1.4'
 'O' 'O' 0.0492 0.0322 'International Tables Vol C Tables 4.2.6.8 and 6.1.1.4'

_shelx_space_group_comment
;
The symmetry employed for this shelxl refinement is uniquely defined
by the following loop, which should always be used as a source of
symmetry information in preference to the above space-group names.
They are only intended as comments.
;
_space_group_crystal_system       'triclinic'
_space_group_IT_number            2
_space_group_name_H-M_alt         'P -1'
_space_group_name_Hall            '-P 1'
loop_
  _space_group_symop_operation_xyz
 'x, y, z'
 '-x, -y, -z'

_cell_length_a                    12.6007(4)
_cell_length_b                    16.0006(5)
_cell_length_c                    17.3353(5)
_cell_angle_alpha                 106.0735(15)
_cell_angle_beta                  101.0732(16)
_cell_angle_gamma                 92.4060(16)
_cell_volume                      3279.14(18)
_cell_formula_units_Z             2
_cell_measurement_reflns_used     ?
_cell_measurement_temperature     173(2)
_cell_measurement_theta_max       ?
_cell_measurement_theta_min       ?
_shelx_estimated_absorpt_T_max    ?
_shelx_estimated_absorpt_T_min    ?
_exptl_absorpt_coefficient_mu     0.774
_exptl_absorpt_correction_T_max   ?
_exptl_absorpt_correction_T_min   ?
_exptl_absorpt_correction_type    ?
_exptl_absorpt_process_details    ?
_exptl_crystal_colour             colourless
_exptl_crystal_density_diffrn     1.306
_exptl_crystal_density_meas       ?
_exptl_crystal_density_method     ?
_exptl_crystal_description        block
_exptl_crystal_F_000              1368
_exptl_crystal_size_max           0.30
_exptl_crystal_size_mid           0.22
_exptl_crystal_size_min           0.18
_exptl_special_details
;
 ?
;
_exptl_transmission_factor_max    ?
_exptl_transmission_factor_min    ?
_diffrn_reflns_av_R_equivalents   0.0786
_diffrn_reflns_av_unetI/netI      0.0744
_diffrn_reflns_Laue_measured_fraction_full 0.922
_diffrn_reflns_Laue_measured_fraction_max 0.976
_diffrn_reflns_limit_h_max        14
_diffrn_reflns_limit_h_min        -14
_diffrn_reflns_limit_k_max        18
_diffrn_reflns_limit_k_min        -18
_diffrn_reflns_limit_l_max        20
_diffrn_reflns_limit_l_min        -20
_diffrn_reflns_number             48851
_diffrn_reflns_point_group_measured_fraction_full 0.922
_diffrn_reflns_point_group_measured_fraction_max 0.976
_diffrn_reflns_theta_full         67.679
_diffrn_reflns_theta_max          65.083
_diffrn_reflns_theta_min          2.714
_diffrn_ambient_temperature       173(2)
_diffrn_detector_area_resol_mean  ?
_diffrn_measured_fraction_theta_full 0.922
_diffrn_measured_fraction_theta_max 0.976
_diffrn_measurement_device_type   ?
_diffrn_measurement_method        ?
_diffrn_radiation_type            CuK\a
_diffrn_radiation_wavelength      1.54178
_diffrn_source                    ?
_diffrn_standards_number          0
_reflns_Friedel_coverage          0.000
_reflns_Friedel_fraction_full     .
_reflns_Friedel_fraction_max      .
_reflns_number_gt                 7653
_reflns_number_total              10914
_reflns_special_details
;
 Reflections were merged by SHELXL according to the crystal
 class for the calculation of statistics and refinement.
 
 _reflns_Friedel_fraction is defined as the number of unique
 Friedel pairs measured divided by the number that would be
 possible theoretically, ignoring centric projections and
 systematic absences.
;
_reflns_threshold_expression      'I > 2\s(I)'
_computing_cell_refinement        ?
_computing_data_collection        ?
_computing_data_reduction         ?
_computing_molecular_graphics     ?
_computing_publication_material   ?
_computing_structure_refinement   'SHELXL-2013 (Sheldrick, 2013)'
_computing_structure_solution     ?
_refine_diff_density_max          0.761
_refine_diff_density_min          -0.524
_refine_diff_density_rms          0.074
_refine_ls_extinction_coef        .
_refine_ls_extinction_method      none
_refine_ls_goodness_of_fit_ref    1.022
_refine_ls_hydrogen_treatment     constr
_refine_ls_matrix_type            full
_refine_ls_number_parameters      853
_refine_ls_number_reflns          10914
_refine_ls_number_restraints      0
_refine_ls_R_factor_all           0.1118
_refine_ls_R_factor_gt            0.0771
_refine_ls_restrained_S_all       1.022
_refine_ls_shift/su_max           0.000
_refine_ls_shift/su_mean          0.000
_refine_ls_structure_factor_coef  Fsqd
_refine_ls_weighting_details
'w=1/[\s^2^(Fo^2^)+(0.1018P)^2^+4.6836P] where P=(Fo^2^+2Fc^2^)/3'
_refine_ls_weighting_scheme       calc
_refine_ls_wR_factor_gt           0.1941
_refine_ls_wR_factor_ref          0.2207
_refine_special_details
;
 ?
;
_olex2_refinement_description
;
1. Fixed Uiso
 At 1.2 times of:
  All C(H) groups, All C(H,H) groups, All N(H) groups
 At 1.5 times of:
  All C(H,H,H) groups
2.a Secondary CH2 refined with riding coordinates:
 C1A(H1AA,H1AB), C1B(H1BA,H1BB), C53(H53A,H53B), C54(H54A,H54B), C55(H55A,
 H55B), C56(H56A,H56B), C57(H57A,H57B), C58(H58A,H58B), C59(H59A,H59B),
 C60(H60A,H60B), C61(H61A,H61B), C62(H62A,H62B), C63(H63A,H63B), C64(H64A,H64B),
  C65(H65A,H65B), C66(H66A,H66B), C2S(H2SA,H2SB), C3S(H3SA,H3SB)
2.b Aromatic/amide H refined with riding coordinates:
 N2(H2), N3(H3), C4(H4), C5(H5), C7(H7), C8(H8), C13(H13), C14(H14), C16(H16),
 C17(H17), C19(H19), C20(H20), C25(H25), C26(H26), C28(H28), C29(H29), C34(H34),
  C35(H35), C37(H37), C38(H38), C40(H40), C41(H41), C46(H46), C47(H47),
 C49(H49), C50(H50)
2.c Idealised Me refined as rotating group:
 C1(H1A,H1B,H1C), C22(H22A,H22B,H22C), C31(H31A,H31B,H31C), C52(H52A,H52B,
 H52C), C1C(H1CA,H1CB,H1CC), C4S(H4SA,H4SB,H4SC)
;
_atom_sites_solution_hydrogens    geom
_atom_sites_solution_primary      ?
_atom_sites_solution_secondary    ?
loop_
  _atom_site_label
  _atom_site_type_symbol
  _atom_site_fract_x
  _atom_site_fract_y
  _atom_site_fract_z
  _atom_site_U_iso_or_equiv
  _atom_site_adp_type
  _atom_site_occupancy
  _atom_site_site_symmetry_order
  _atom_site_calc_flag
  _atom_site_refinement_flags_posn
  _atom_site_refinement_flags_adp
  _atom_site_refinement_flags_occupancy
  _atom_site_disorder_assembly
  _atom_site_disorder_group
 O1 O 1.9851(2) -0.7362(2) -0.22082(18) 0.0565(8) Uani 1 1 d . . . . .
 O2 O 1.8553(2) -0.77038(18) -0.33579(15) 0.0448(7) Uani 1 1 d . . . . .
 O3 O 0.91119(18) -0.53047(16) 0.11925(14) 0.0351(6) Uani 1 1 d . . . . .
 O4 O 1.03424(19) -0.47740(16) 0.23732(14) 0.0379(6) Uani 1 1 d . . . . .
 O5 O 1.8182(2) -0.2090(2) -0.5770(2) 0.0662(9) Uani 1 1 d . . . . .
 O6 O 1.6974(2) -0.2190(2) -0.69307(17) 0.0568(8) Uani 1 1 d . . . . .
 O7 O 0.8216(3) 0.0445(3) -0.1614(2) 0.0848(12) Uani 1 1 d . . . . .
 O8 O 0.7247(2) 0.0251(2) -0.28762(18) 0.0557(8) Uani 1 1 d . . . . .
 N1 N 1.4547(2) -0.55814(16) -0.17367(15) 0.0231(6) Uani 1 1 d . . . . .
 N2 N 1.3168(2) -0.52446(16) -0.11037(15) 0.0228(6) Uani 1 1 d . . . . .
 H2 H 1.2571 -0.5017 -0.0993 0.027 Uiso 1 1 calc R U . . .
 N3 N 1.3726(2) -0.23007(17) -0.37961(16) 0.0254(6) Uani 1 1 d . . . . .
 H3 H 1.4278 -0.2583 -0.3934 0.031 Uiso 1 1 calc R U . . .
 N4 N 1.2282(2) -0.19572(17) -0.32274(16) 0.0271(6) Uani 1 1 d . . . . .
 C1 C 1.9360(3) -0.7941(3) -0.3852(3) 0.0533(11) Uani 1 1 d . . . . .
 H1A H 1.9766 -0.8393 -0.3685 0.080 Uiso 1 1 calc R U . . .
 H1B H 1.9861 -0.7424 -0.3772 0.080 Uiso 1 1 calc R U . . .
 H1C H 1.8998 -0.8165 -0.4433 0.080 Uiso 1 1 calc R U . . .
 C2 C 1.8909(3) -0.7420(2) -0.2548(2) 0.0366(8) Uani 1 1 d . . . . .
 C3 C 1.8007(3) -0.7183(2) -0.2112(2) 0.0298(7) Uani 1 1 d . . . . .
 C4 C 1.6979(3) -0.7117(2) -0.2535(2) 0.0305(8) Uani 1 1 d . . . . .
 H4 H 1.6841 -0.7232 -0.3115 0.037 Uiso 1 1 calc R U . . .
 C5 C 1.6154(3) -0.6886(2) -0.21248(19) 0.0273(7) Uani 1 1 d . . . . .
 H5 H 1.5454 -0.6845 -0.2427 0.033 Uiso 1 1 calc R U . . .
 C6 C 1.6327(3) -0.6711(2) -0.12729(19) 0.0254(7) Uani 1 1 d . . . . .
 C7 C 1.7364(3) -0.6784(2) -0.0855(2) 0.0323(8) Uani 1 1 d . . . . .
 H7 H 1.7502 -0.6676 -0.0276 0.039 Uiso 1 1 calc R U . . .
 C8 C 1.8197(3) -0.7011(2) -0.1266(2) 0.0351(8) Uani 1 1 d . . . . .
 H8 H 1.8900 -0.7048 -0.0967 0.042 Uiso 1 1 calc R U . . .
 C9 C 1.5429(2) -0.64694(19) -0.08415(19) 0.0235(7) Uani 1 1 d . . . . .
 C10 C 1.4618(2) -0.5978(2) -0.11155(18) 0.0223(7) Uani 1 1 d . . . . .
 C11 C 1.3754(2) -0.57737(19) -0.07096(19) 0.0225(7) Uani 1 1 d . . . . .
 C12 C 1.3650(2) -0.6027(2) -0.00147(19) 0.0244(7) Uani 1 1 d . . . . .
 C13 C 1.4482(3) -0.6485(2) 0.0261(2) 0.0273(7) Uani 1 1 d . . . . .
 H13 H 1.4468 -0.6655 0.0742 0.033 Uiso 1 1 calc R U . . .
 C14 C 1.5337(3) -0.6707(2) -0.01389(19) 0.0273(7) Uani 1 1 d . . . . .
 H14 H 1.5875 -0.7030 0.0075 0.033 Uiso 1 1 calc R U . . .
 C15 C 1.2733(3) -0.5815(2) 0.03993(19) 0.0252(7) Uani 1 1 d . . . . .
 C16 C 1.1663(3) -0.5957(2) -0.0052(2) 0.0279(7) Uani 1 1 d . . . . .
 H16 H 1.1523 -0.6196 -0.0632 0.033 Uiso 1 1 calc R U . . .
 C17 C 1.0806(3) -0.5751(2) 0.0336(2) 0.0302(8) Uani 1 1 d . . . . .
 H17 H 1.0083 -0.5855 0.0021 0.036 Uiso 1 1 calc R U . . .
 C18 C 1.0996(3) -0.5396(2) 0.11802(19) 0.0258(7) Uani 1 1 d . . . . .
 C19 C 1.2058(3) -0.5259(2) 0.1637(2) 0.0287(7) Uani 1 1 d . . . . .
 H19 H 1.2195 -0.5018 0.2217 0.034 Uiso 1 1 calc R U . . .
 C20 C 1.2912(3) -0.5471(2) 0.1253(2) 0.0281(7) Uani 1 1 d . . . . .
 H20 H 1.3632 -0.5381 0.1572 0.034 Uiso 1 1 calc R U . . .
 C21 C 1.0052(3) -0.5157(2) 0.1566(2) 0.0299(8) Uani 1 1 d . . . . .
 C22 C 0.9465(3) -0.4540(3) 0.2789(2) 0.0503(11) Uani 1 1 d . . . . .
 H22A H 0.9762 -0.4250 0.3373 0.075 Uiso 1 1 calc R U . . .
 H22B H 0.8997 -0.5069 0.2729 0.075 Uiso 1 1 calc R U . . .
 H22C H 0.9038 -0.4143 0.2546 0.075 Uiso 1 1 calc R U . . .
 C23 C 1.3695(2) -0.51421(19) -0.17019(18) 0.0214(7) Uani 1 1 d . . . . .
 C24 C 1.3419(2) -0.45224(19) -0.21702(18) 0.0214(7) Uani 1 1 d . . . . .
 C25 C 1.3816(3) -0.4589(2) -0.2881(2) 0.0294(8) Uani 1 1 d . . . . .
 H25 H 1.4183 -0.5080 -0.3095 0.035 Uiso 1 1 calc R U . . .
 C26 C 1.3680(3) -0.3948(2) -0.3279(2) 0.0307(8) Uani 1 1 d . . . . .
 H26 H 1.3948 -0.4003 -0.3765 0.037 Uiso 1 1 calc R U . . .
 C27 C 1.3150(2) -0.3223(2) -0.29668(19) 0.0237(7) Uani 1 1 d . . . . .
 C28 C 1.2722(2) -0.3171(2) -0.22757(19) 0.0250(7) Uani 1 1 d . . . . .
 H28 H 1.2334 -0.2690 -0.2072 0.030 Uiso 1 1 calc R U . . .
 C29 C 1.2857(2) -0.3811(2) -0.18843(19) 0.0255(7) Uani 1 1 d . . . . .
 H29 H 1.2561 -0.3766 -0.1412 0.031 Uiso 1 1 calc R U . . .
 C30 C 1.3045(2) -0.2496(2) -0.33282(18) 0.0235(7) Uani 1 1 d . . . . .
 C31 C 1.7807(4) -0.2434(4) -0.7398(3) 0.0803(17) Uani 1 1 d . . . . .
 H31A H 1.7470 -0.2649 -0.7985 0.120 Uiso 1 1 calc R U . . .
 H31B H 1.8189 -0.2895 -0.7227 0.120 Uiso 1 1 calc R U . . .
 H31C H 1.8326 -0.1923 -0.7300 0.120 Uiso 1 1 calc R U . . .
 C32 C 1.7277(3) -0.2037(2) -0.6121(3) 0.0415(9) Uani 1 1 d . . . . .
 C33 C 1.6369(3) -0.1777(2) -0.5701(2) 0.0332(8) Uani 1 1 d . . . . .
 C34 C 1.5398(3) -0.1577(2) -0.6118(2) 0.0340(8) Uani 1 1 d . . . . .
 H34 H 1.5314 -0.1600 -0.6680 0.041 Uiso 1 1 calc R U . . .
 C35 C 1.4561(3) -0.1348(2) -0.5723(2) 0.0318(8) Uani 1 1 d . . . . .
 H35 H 1.3904 -0.1213 -0.6015 0.038 Uiso 1 1 calc R U . . .
 C36 C 1.4665(3) -0.1311(2) -0.4899(2) 0.0281(7) Uani 1 1 d . . . . .
 C37 C 1.5648(3) -0.1499(2) -0.4479(2) 0.0336(8) Uani 1 1 d . . . . .
 H37 H 1.5733 -0.1480 -0.3918 0.040 Uiso 1 1 calc R U . . .
 C38 C 1.6496(3) -0.1712(2) -0.4874(2) 0.0359(8) Uani 1 1 d . . . . .
 H38 H 1.7169 -0.1815 -0.4577 0.043 Uiso 1 1 calc R U . . .
 C39 C 1.3730(3) -0.1108(2) -0.4507(2) 0.0287(7) Uani 1 1 d . . . . .
 C40 C 1.3090(3) -0.0447(2) -0.4639(2) 0.0330(8) Uani 1 1 d . . . . .
 H40 H 1.3282 -0.0117 -0.4980 0.040 Uiso 1 1 calc R U . . .
 C41 C 1.2192(3) -0.0250(2) -0.4298(2) 0.0321(8) Uani 1 1 d . . . . .
 H41 H 1.1795 0.0208 -0.4414 0.039 Uiso 1 1 calc R U . . .
 C42 C 1.1847(3) -0.0697(2) -0.3793(2) 0.0298(8) Uani 1 1 d . . . . .
 C43 C 1.2465(3) -0.1371(2) -0.36582(19) 0.0261(7) Uani 1 1 d . . . . .
 C44 C 1.3373(2) -0.1571(2) -0.40093(19) 0.0250(7) Uani 1 1 d . . . . .
 C45 C 1.0884(3) -0.0480(2) -0.3432(2) 0.0305(8) Uani 1 1 d . . . . .
 C46 C 0.9914(3) -0.0367(3) -0.3912(2) 0.0405(9) Uani 1 1 d . . . . .
 H46 H 0.9861 -0.0449 -0.4482 0.049 Uiso 1 1 calc R U . . .
 C47 C 0.9032(3) -0.0138(3) -0.3572(2) 0.0439(9) Uani 1 1 d . . . . .
 H47 H 0.8373 -0.0069 -0.3911 0.053 Uiso 1 1 calc R U . . .
 C48 C 0.9094(3) -0.0006(2) -0.2739(2) 0.0361(8) Uani 1 1 d . . . . .
 C49 C 1.0057(3) -0.0132(3) -0.2265(2) 0.0462(10) Uani 1 1 d . . . . .
 H49 H 1.0109 -0.0046 -0.1694 0.055 Uiso 1 1 calc R U . . .
 C50 C 1.0935(3) -0.0376(3) -0.2602(2) 0.0406(9) Uani 1 1 d . . . . .
 H50 H 1.1581 -0.0474 -0.2268 0.049 Uiso 1 1 calc R U . . .
 C51 C 0.8165(4) 0.0258(3) -0.2340(3) 0.0480(10) Uani 1 1 d . . . . .
 C52 C 0.6321(4) 0.0477(4) -0.2516(3) 0.0696(15) Uani 1 1 d . . . . .
 H52A H 0.5665 0.0373 -0.2952 0.104 Uiso 1 1 calc R U . . .
 H52B H 0.6430 0.1095 -0.2197 0.104 Uiso 1 1 calc R U . . .
 H52C H 0.6237 0.0116 -0.2154 0.104 Uiso 1 1 calc R U . . .
 O9 O 1.6056(2) -0.25584(19) -0.27689(17) 0.0534(7) Uani 1 1 d . . . . .
 O10 O 1.3385(2) -0.42187(19) -0.54589(18) 0.0574(8) Uani 1 1 d . . . . .
 O11 O 1.5390(2) -0.35500(18) -0.44112(15) 0.0462(7) Uani 1 1 d . . . . .
 O12 O 1.0663(3) -0.3860(3) -0.5222(2) 0.0890(12) Uani 1 1 d . . . . .
 O13 O 1.4771(2) -0.16798(18) -0.10974(16) 0.0526(7) Uani 1 1 d . . . . .
 O14 O 0.9083(3) -0.3273(2) -0.3649(2) 0.0733(10) Uani 1 1 d . . . . .
 O15 O 1.2663(3) -0.1744(2) -0.06413(19) 0.0655(9) Uani 1 1 d . . . . .
 O16 O 1.0480(2) -0.21274(19) -0.15862(18) 0.0571(8) Uani 1 1 d . . . . .
 C1A C 1.0362(5) -0.3778(4) -0.4429(4) 0.099(2) Uani 1 1 d . . . . .
 H1AA H 1.0167 -0.4362 -0.4374 0.118 Uiso 1 1 calc R U . . .
 H1AB H 1.0972 -0.3474 -0.3969 0.118 Uiso 1 1 calc R U . . .
 C1B C 0.9452(6) -0.3282(5) -0.4427(4) 0.102(2) Uani 1 1 d . . . . .
 H1BA H 0.8866 -0.3557 -0.4914 0.122 Uiso 1 1 calc R U . . .
 H1BB H 0.9663 -0.2679 -0.4429 0.122 Uiso 1 1 calc R U . . .
 C53 C 0.9579(4) -0.2555(3) -0.2973(3) 0.0564(11) Uani 1 1 d . . . . .
 H53A H 0.9079 -0.2093 -0.2895 0.068 Uiso 1 1 calc R U . . .
 H53B H 1.0249 -0.2311 -0.3085 0.068 Uiso 1 1 calc R U . . .
 C54 C 0.9856(3) -0.2835(3) -0.2208(3) 0.0549(11) Uani 1 1 d . . . . .
 H54A H 0.9183 -0.2995 -0.2044 0.066 Uiso 1 1 calc R U . . .
 H54B H 1.0275 -0.3350 -0.2305 0.066 Uiso 1 1 calc R U . . .
 C55 C 1.0841(4) -0.2322(3) -0.0831(3) 0.0555(11) Uani 1 1 d . . . . .
 H55A H 1.1128 -0.2900 -0.0935 0.067 Uiso 1 1 calc R U . . .
 H55B H 1.0230 -0.2336 -0.0550 0.067 Uiso 1 1 calc R U . . .
 C56 C 1.1708(4) -0.1629(3) -0.0313(3) 0.0605(12) Uani 1 1 d . . . . .
 H56A H 1.1468 -0.1046 -0.0305 0.073 Uiso 1 1 calc R U . . .
 H56B H 1.1862 -0.1666 0.0258 0.073 Uiso 1 1 calc R U . . .
 C57 C 1.3494(4) -0.1049(3) -0.0285(3) 0.0668(13) Uani 1 1 d . . . . .
 H57A H 1.3980 -0.1159 0.0190 0.080 Uiso 1 1 calc R U . . .
 H57B H 1.3171 -0.0497 -0.0085 0.080 Uiso 1 1 calc R U . . .
 C58 C 1.4128(4) -0.0967(3) -0.0904(3) 0.0624(13) Uani 1 1 d . . . . .
 H58A H 1.3623 -0.0947 -0.1411 0.075 Uiso 1 1 calc R U . . .
 H58B H 1.4609 -0.0412 -0.0689 0.075 Uiso 1 1 calc R U . . .
 C59 C 1.5357(4) -0.1616(3) -0.1698(3) 0.0568(12) Uani 1 1 d . . . . .
 H59A H 1.5930 -0.1118 -0.1469 0.068 Uiso 1 1 calc R U . . .
 H59B H 1.4862 -0.1516 -0.2175 0.068 Uiso 1 1 calc R U . . .
 C60 C 1.5866(4) -0.2464(3) -0.1967(2) 0.0545(11) Uani 1 1 d . . . . .
 H60A H 1.6560 -0.2448 -0.1579 0.065 Uiso 1 1 calc R U . . .
 H60B H 1.5372 -0.2964 -0.1973 0.065 Uiso 1 1 calc R U . . .
 C61 C 1.6486(3) -0.3359(3) -0.3077(3) 0.0537(11) Uani 1 1 d . . . . .
 H61A H 1.6043 -0.3845 -0.3003 0.064 Uiso 1 1 calc R U . . .
 H61B H 1.7239 -0.3338 -0.2769 0.064 Uiso 1 1 calc R U . . .
 C62 C 1.6481(3) -0.3514(3) -0.3966(3) 0.0518(11) Uani 1 1 d . . . . .
 H62A H 1.6938 -0.3036 -0.4040 0.062 Uiso 1 1 calc R U . . .
 H62B H 1.6786 -0.4071 -0.4178 0.062 Uiso 1 1 calc R U . . .
 C63 C 1.5292(4) -0.3925(3) -0.5269(2) 0.0489(10) Uani 1 1 d . . . . .
 H63A H 1.5366 -0.4559 -0.5392 0.059 Uiso 1 1 calc R U . . .
 H63B H 1.5872 -0.3650 -0.5458 0.059 Uiso 1 1 calc R U . . .
 C64 C 1.4212(4) -0.3778(3) -0.5695(2) 0.0545(12) Uani 1 1 d . . . . .
 H64A H 1.4130 -0.3144 -0.5551 0.065 Uiso 1 1 calc R U . . .
 H64B H 1.4144 -0.3999 -0.6297 0.065 Uiso 1 1 calc R U . . .
 C65 C 1.2370(4) -0.3911(4) -0.5637(3) 0.0751(15) Uani 1 1 d . . . . .
 H65A H 1.2073 -0.4111 -0.6237 0.090 Uiso 1 1 calc R U . . .
 H65B H 1.2449 -0.3263 -0.5457 0.090 Uiso 1 1 calc R U . . .
 C66 C 1.1650(4) -0.4230(5) -0.5223(4) 0.098(2) Uani 1 1 d . . . . .
 H66A H 1.1488 -0.4869 -0.5477 0.118 Uiso 1 1 calc R U . . .
 H66B H 1.2030 -0.4134 -0.4645 0.118 Uiso 1 1 calc R U . . .
 O1S O 1.7831(3) -0.0895(2) 0.0047(3) 0.0984(14) Uani 1 1 d . . . . .
 O2S O 1.6892(3) -0.0791(2) 0.1469(2) 0.0773(10) Uani 1 1 d . . . . .
 C1C C 1.8656(5) -0.0945(4) -0.0389(4) 0.100(2) Uani 1 1 d . . . . .
 H1CA H 1.9359 -0.0913 -0.0018 0.150 Uiso 1 1 calc R U . . .
 H1CB H 1.8655 -0.0457 -0.0629 0.150 Uiso 1 1 calc R U . . .
 H1CC H 1.8536 -0.1499 -0.0829 0.150 Uiso 1 1 calc R U . . .
 C2S C 1.7725(4) -0.1556(3) 0.0397(4) 0.0707(14) Uani 1 1 d . . . . .
 H2SA H 1.8401 -0.1538 0.0804 0.085 Uiso 1 1 calc R U . . .
 H2SB H 1.7630 -0.2124 -0.0034 0.085 Uiso 1 1 calc R U . . .
 C3S C 1.6798(5) -0.1494(4) 0.0805(4) 0.0790(16) Uani 1 1 d . . . . .
 H3SA H 1.6132 -0.1477 0.0401 0.095 Uiso 1 1 calc R U . . .
 H3SB H 1.6703 -0.2029 0.0975 0.095 Uiso 1 1 calc R U . . .
 C4S C 1.6067(4) -0.0777(4) 0.1909(3) 0.0745(15) Uani 1 1 d . . . . .
 H4SA H 1.6239 -0.0281 0.2409 0.112 Uiso 1 1 calc R U . . .
 H4SB H 1.6011 -0.1323 0.2058 0.112 Uiso 1 1 calc R U . . .
 H4SC H 1.5374 -0.0717 0.1569 0.112 Uiso 1 1 calc R U . . .

loop_
  _atom_site_aniso_label
  _atom_site_aniso_U_11
  _atom_site_aniso_U_22
  _atom_site_aniso_U_33
  _atom_site_aniso_U_23
  _atom_site_aniso_U_13
  _atom_site_aniso_U_12
 O1 0.0308(16) 0.087(2) 0.0528(17) 0.0159(16) 0.0165(13) 0.0155(14)
 O2 0.0387(15) 0.0556(17) 0.0383(15) 0.0034(13) 0.0187(12) 0.0080(12)
 O3 0.0233(13) 0.0499(15) 0.0374(13) 0.0196(12) 0.0089(11) 0.0064(11)
 O4 0.0289(13) 0.0486(15) 0.0343(14) 0.0054(12) 0.0119(11) 0.0030(11)
 O5 0.0388(17) 0.105(3) 0.068(2) 0.0388(19) 0.0182(15) 0.0292(17)
 O6 0.0412(16) 0.081(2) 0.0462(17) 0.0100(15) 0.0136(13) 0.0232(15)
 O7 0.084(3) 0.127(3) 0.049(2) 0.018(2) 0.0332(18) 0.047(2)
 O8 0.0480(17) 0.075(2) 0.0650(19) 0.0395(17) 0.0294(15) 0.0293(15)
 N1 0.0218(14) 0.0267(14) 0.0238(13) 0.0120(11) 0.0048(11) 0.0048(11)
 N2 0.0194(13) 0.0274(14) 0.0269(14) 0.0131(12) 0.0086(11) 0.0086(11)
 N3 0.0237(14) 0.0281(15) 0.0289(14) 0.0135(12) 0.0075(12) 0.0077(11)
 N4 0.0259(14) 0.0299(15) 0.0285(15) 0.0152(12) 0.0028(12) 0.0033(12)
 C1 0.051(3) 0.060(3) 0.050(2) 0.005(2) 0.030(2) 0.009(2)
 C2 0.029(2) 0.039(2) 0.045(2) 0.0132(17) 0.0130(17) 0.0094(16)
 C3 0.0285(18) 0.0275(18) 0.0353(19) 0.0096(15) 0.0106(15) 0.0043(14)
 C4 0.0333(19) 0.0315(19) 0.0272(17) 0.0080(15) 0.0075(15) 0.0071(15)
 C5 0.0229(17) 0.0304(18) 0.0282(17) 0.0094(15) 0.0024(14) 0.0074(14)
 C6 0.0266(17) 0.0230(17) 0.0294(17) 0.0113(14) 0.0067(14) 0.0054(13)
 C7 0.0279(18) 0.043(2) 0.0285(18) 0.0127(16) 0.0060(15) 0.0104(15)
 C8 0.0233(18) 0.046(2) 0.036(2) 0.0136(17) 0.0021(15) 0.0107(15)
 C9 0.0238(16) 0.0217(16) 0.0263(17) 0.0088(13) 0.0053(13) 0.0035(13)
 C10 0.0220(16) 0.0237(16) 0.0245(16) 0.0107(13) 0.0066(13) 0.0034(12)
 C11 0.0225(16) 0.0216(16) 0.0252(16) 0.0098(13) 0.0048(13) 0.0039(12)
 C12 0.0255(17) 0.0243(17) 0.0266(17) 0.0109(14) 0.0080(14) 0.0023(13)
 C13 0.0297(18) 0.0315(18) 0.0274(17) 0.0177(15) 0.0078(14) 0.0054(14)
 C14 0.0262(17) 0.0294(18) 0.0292(17) 0.0140(15) 0.0035(14) 0.0073(14)
 C15 0.0295(18) 0.0266(17) 0.0275(17) 0.0177(14) 0.0104(14) 0.0048(13)
 C16 0.0276(18) 0.0323(19) 0.0257(17) 0.0115(14) 0.0060(14) 0.0015(14)
 C17 0.0240(17) 0.038(2) 0.0326(18) 0.0173(16) 0.0058(14) 0.0036(14)
 C18 0.0252(17) 0.0268(17) 0.0306(18) 0.0138(14) 0.0104(14) 0.0014(13)
 C19 0.0279(18) 0.0357(19) 0.0247(17) 0.0114(15) 0.0068(14) 0.0042(14)
 C20 0.0200(16) 0.0365(19) 0.0314(18) 0.0161(15) 0.0050(14) 0.0022(14)
 C21 0.030(2) 0.0322(19) 0.0338(19) 0.0155(16) 0.0118(16) 0.0043(14)
 C22 0.038(2) 0.065(3) 0.045(2) 0.002(2) 0.0220(19) 0.013(2)
 C23 0.0182(15) 0.0247(16) 0.0228(16) 0.0079(13) 0.0060(13) 0.0024(12)
 C24 0.0184(15) 0.0232(16) 0.0255(16) 0.0110(13) 0.0057(13) 0.0040(12)
 C25 0.0334(19) 0.0315(19) 0.0300(18) 0.0134(15) 0.0140(15) 0.0144(15)
 C26 0.0340(19) 0.038(2) 0.0295(18) 0.0174(15) 0.0161(15) 0.0132(15)
 C27 0.0192(15) 0.0266(17) 0.0263(16) 0.0105(14) 0.0025(13) 0.0036(13)
 C28 0.0247(17) 0.0271(17) 0.0264(17) 0.0105(14) 0.0079(13) 0.0081(13)
 C29 0.0244(17) 0.0346(18) 0.0245(16) 0.0152(14) 0.0115(14) 0.0082(14)
 C30 0.0226(16) 0.0254(17) 0.0236(16) 0.0109(14) 0.0017(13) 0.0028(13)
 C31 0.060(3) 0.125(5) 0.058(3) 0.014(3) 0.027(3) 0.048(3)
 C32 0.036(2) 0.040(2) 0.055(3) 0.0189(19) 0.0133(19) 0.0108(17)
 C33 0.0314(19) 0.0257(18) 0.045(2) 0.0149(16) 0.0088(16) 0.0017(14)
 C34 0.034(2) 0.035(2) 0.0358(19) 0.0152(16) 0.0070(16) 0.0031(15)
 C35 0.0299(18) 0.0326(19) 0.0364(19) 0.0177(16) 0.0041(15) 0.0020(14)
 C36 0.0299(18) 0.0219(17) 0.0349(19) 0.0132(14) 0.0058(15) -0.0019(13)
 C37 0.038(2) 0.0321(19) 0.0352(19) 0.0185(16) 0.0059(16) 0.0010(15)
 C38 0.0287(19) 0.035(2) 0.047(2) 0.0197(17) 0.0023(16) 0.0058(15)
 C39 0.0301(18) 0.0270(18) 0.0303(18) 0.0133(15) 0.0029(14) 0.0002(14)
 C40 0.037(2) 0.0305(19) 0.0369(19) 0.0191(16) 0.0068(16) 0.0022(15)
 C41 0.0349(19) 0.0268(18) 0.037(2) 0.0158(16) 0.0043(16) 0.0048(14)
 C42 0.0307(18) 0.0286(18) 0.0305(18) 0.0102(15) 0.0052(15) 0.0020(14)
 C43 0.0275(17) 0.0253(17) 0.0250(16) 0.0109(14) -0.0001(14) -0.0022(13)
 C44 0.0250(17) 0.0218(16) 0.0275(17) 0.0089(14) 0.0018(14) 0.0003(13)
 C45 0.0339(19) 0.0240(17) 0.0346(19) 0.0114(15) 0.0056(15) 0.0038(14)
 C46 0.040(2) 0.054(2) 0.037(2) 0.0240(18) 0.0132(17) 0.0191(18)
 C47 0.041(2) 0.058(3) 0.043(2) 0.028(2) 0.0094(18) 0.0181(19)
 C48 0.040(2) 0.032(2) 0.039(2) 0.0115(16) 0.0139(17) 0.0103(16)
 C49 0.049(2) 0.057(3) 0.029(2) 0.0073(18) 0.0072(18) 0.009(2)
 C50 0.034(2) 0.052(2) 0.0313(19) 0.0092(17) -0.0003(16) 0.0041(17)
 C51 0.057(3) 0.040(2) 0.053(3) 0.016(2) 0.022(2) 0.0185(19)
 C52 0.063(3) 0.090(4) 0.096(4) 0.061(3) 0.055(3) 0.044(3)
 O9 0.0628(19) 0.0595(19) 0.0441(16) 0.0281(14) 0.0082(14) 0.0015(15)
 O10 0.064(2) 0.0581(19) 0.0572(18) 0.0296(15) 0.0101(15) 0.0125(15)
 O11 0.0482(16) 0.0592(18) 0.0381(15) 0.0197(13) 0.0171(13) 0.0069(13)
 O12 0.109(3) 0.118(3) 0.066(2) 0.043(2) 0.048(2) 0.047(3)
 O13 0.0585(18) 0.0528(18) 0.0432(16) 0.0174(14) -0.0013(14) 0.0000(14)
 O14 0.068(2) 0.084(2) 0.062(2) 0.0070(18) 0.0252(18) -0.0167(18)
 O15 0.060(2) 0.055(2) 0.062(2) -0.0118(16) 0.0100(16) 0.0121(16)
 O16 0.0610(19) 0.0517(18) 0.0590(19) 0.0148(15) 0.0138(15) 0.0146(15)
 C1A 0.085(4) 0.080(4) 0.115(5) 0.029(4) -0.011(4) -0.014(3)
 C1B 0.110(5) 0.090(5) 0.090(5) 0.021(4) -0.008(4) 0.009(4)
 C53 0.052(3) 0.054(3) 0.061(3) 0.010(2) 0.017(2) -0.003(2)
 C54 0.043(2) 0.059(3) 0.063(3) 0.016(2) 0.016(2) -0.002(2)
 C55 0.063(3) 0.064(3) 0.051(3) 0.024(2) 0.023(2) 0.027(2)
 C56 0.075(3) 0.057(3) 0.049(3) 0.006(2) 0.022(2) 0.030(3)
 C57 0.071(3) 0.055(3) 0.057(3) -0.004(2) 0.004(3) 0.006(2)
 C58 0.076(3) 0.039(2) 0.056(3) 0.004(2) -0.009(2) 0.000(2)
 C59 0.066(3) 0.058(3) 0.040(2) 0.020(2) -0.008(2) -0.013(2)
 C60 0.062(3) 0.071(3) 0.035(2) 0.030(2) -0.001(2) -0.001(2)
 C61 0.040(2) 0.077(3) 0.061(3) 0.046(2) 0.012(2) 0.014(2)
 C62 0.043(2) 0.067(3) 0.062(3) 0.038(2) 0.022(2) 0.013(2)
 C63 0.073(3) 0.044(2) 0.042(2) 0.0172(19) 0.032(2) 0.006(2)
 C64 0.095(4) 0.039(2) 0.033(2) 0.0148(19) 0.018(2) 0.006(2)
 C65 0.079(4) 0.099(4) 0.061(3) 0.038(3) 0.019(3) 0.038(3)
 C66 0.049(3) 0.165(7) 0.097(4) 0.070(5) 0.009(3) 0.007(4)
 O1S 0.108(3) 0.063(2) 0.157(4) 0.044(3) 0.085(3) 0.032(2)
 O2S 0.058(2) 0.062(2) 0.096(3) -0.003(2) 0.0175(19) -0.0059(16)
 C1C 0.085(4) 0.071(4) 0.154(6) 0.016(4) 0.072(4) 0.021(3)
 C2S 0.066(3) 0.047(3) 0.093(4) 0.016(3) 0.009(3) 0.007(2)
 C3S 0.086(4) 0.064(3) 0.080(4) 0.017(3) 0.013(3) -0.014(3)
 C4S 0.060(3) 0.091(4) 0.074(3) 0.028(3) 0.015(3) -0.005(3)

_geom_special_details
;
 All esds (except the esd in the dihedral angle between two l.s. planes)
 are estimated using the full covariance matrix.  The cell esds are taken
 into account individually in the estimation of esds in distances, angles
 and torsion angles; correlations between esds in cell parameters are only
 used when they are defined by crystal symmetry.  An approximate (isotropic)
 treatment of cell esds is used for estimating esds involving l.s. planes.
;
loop_
  _geom_bond_atom_site_label_1
  _geom_bond_atom_site_label_2
  _geom_bond_distance
  _geom_bond_site_symmetry_2
  _geom_bond_publ_flag
 O1 C2 1.206(4) . ?
 O2 C1 1.448(4) . ?
 O2 C2 1.329(4) . ?
 O3 C21 1.214(4) . ?
 O4 C21 1.333(4) . ?
 O4 C22 1.440(4) . ?
 O5 C32 1.204(5) . ?
 O6 C31 1.448(5) . ?
 O6 C32 1.330(5) . ?
 O7 C51 1.198(5) . ?
 O8 C51 1.335(5) . ?
 O8 C52 1.440(5) . ?
 N1 C10 1.385(4) . ?
 N1 C23 1.310(4) . ?
 N2 C11 1.382(4) . ?
 N2 C23 1.376(4) . ?
 N3 C30 1.370(4) . ?
 N3 C44 1.385(4) . ?
 N4 C30 1.322(4) . ?
 N4 C43 1.388(4) . ?
 C2 C3 1.488(5) . ?
 C3 C4 1.385(5) . ?
 C3 C8 1.386(5) . ?
 C4 C5 1.376(4) . ?
 C5 C6 1.396(4) . ?
 C6 C7 1.394(5) . ?
 C6 C9 1.479(4) . ?
 C7 C8 1.384(5) . ?
 C9 C10 1.406(4) . ?
 C9 C14 1.396(4) . ?
 C10 C11 1.408(4) . ?
 C11 C12 1.400(4) . ?
 C12 C13 1.389(4) . ?
 C12 C15 1.477(4) . ?
 C13 C14 1.397(4) . ?
 C15 C16 1.397(5) . ?
 C15 C20 1.397(4) . ?
 C16 C17 1.383(4) . ?
 C17 C18 1.384(5) . ?
 C18 C19 1.392(4) . ?
 C18 C21 1.487(4) . ?
 C19 C20 1.377(4) . ?
 C23 C24 1.459(4) . ?
 C24 C25 1.396(4) . ?
 C24 C29 1.391(4) . ?
 C25 C26 1.385(5) . ?
 C26 C27 1.393(4) . ?
 C27 C28 1.389(4) . ?
 C27 C30 1.466(4) . ?
 C28 C29 1.376(4) . ?
 C32 C33 1.485(5) . ?
 C33 C34 1.395(5) . ?
 C33 C38 1.385(5) . ?
 C34 C35 1.373(5) . ?
 C35 C36 1.394(5) . ?
 C36 C37 1.400(5) . ?
 C36 C39 1.474(5) . ?
 C37 C38 1.382(5) . ?
 C39 C40 1.399(5) . ?
 C39 C44 1.403(4) . ?
 C40 C41 1.383(5) . ?
 C41 C42 1.391(5) . ?
 C42 C43 1.401(5) . ?
 C42 C45 1.480(5) . ?
 C43 C44 1.404(4) . ?
 C45 C46 1.389(5) . ?
 C45 C50 1.391(5) . ?
 C46 C47 1.372(5) . ?
 C47 C48 1.387(5) . ?
 C48 C49 1.384(5) . ?
 C48 C51 1.489(5) . ?
 C49 C50 1.370(5) . ?
 O9 C60 1.424(5) . ?
 O9 C61 1.417(5) . ?
 O10 C64 1.418(5) . ?
 O10 C65 1.400(5) . ?
 O11 C62 1.431(5) . ?
 O11 C63 1.419(4) . ?
 O12 C1A 1.469(7) . ?
 O12 C66 1.398(7) . ?
 O13 C58 1.428(5) . ?
 O13 C59 1.411(5) . ?
 O14 C1B 1.506(7) . ?
 O14 C53 1.413(5) . ?
 O15 C56 1.425(5) . ?
 O15 C57 1.410(6) . ?
 O16 C54 1.409(5) . ?
 O16 C55 1.423(5) . ?
 C1A C1B 1.421(8) . ?
 C53 C54 1.498(6) . ?
 C55 C56 1.482(7) . ?
 C57 C58 1.485(7) . ?
 C59 C60 1.519(6) . ?
 C61 C62 1.489(6) . ?
 C63 C64 1.481(6) . ?
 C65 C66 1.419(7) . ?
 O1S C1C 1.391(6) . ?
 O1S C2S 1.369(6) . ?
 O2S C3S 1.350(6) . ?
 O2S C4S 1.400(6) . ?
 C2S C3S 1.472(7) . ?

loop_
  _geom_angle_atom_site_label_1
  _geom_angle_atom_site_label_2
  _geom_angle_atom_site_label_3
  _geom_angle
  _geom_angle_site_symmetry_1
  _geom_angle_site_symmetry_3
  _geom_angle_publ_flag
 C2 O2 C1 117.0(3) . . ?
 C21 O4 C22 115.7(3) . . ?
 C32 O6 C31 116.3(3) . . ?
 C51 O8 C52 114.8(3) . . ?
 C23 N1 C10 105.5(2) . . ?
 C23 N2 C11 106.9(2) . . ?
 C30 N3 C44 106.3(2) . . ?
 C30 N4 C43 104.9(3) . . ?
 O1 C2 O2 124.0(3) . . ?
 O1 C2 C3 124.2(3) . . ?
 O2 C2 C3 111.8(3) . . ?
 C4 C3 C2 121.2(3) . . ?
 C4 C3 C8 119.0(3) . . ?
 C8 C3 C2 119.8(3) . . ?
 C5 C4 C3 120.8(3) . . ?
 C4 C5 C6 121.2(3) . . ?
 C5 C6 C9 120.6(3) . . ?
 C7 C6 C5 117.5(3) . . ?
 C7 C6 C9 122.0(3) . . ?
 C8 C7 C6 121.4(3) . . ?
 C7 C8 C3 120.2(3) . . ?
 C10 C9 C6 121.6(3) . . ?
 C14 C9 C6 122.5(3) . . ?
 C14 C9 C10 115.9(3) . . ?
 N1 C10 C9 129.2(3) . . ?
 N1 C10 C11 109.9(3) . . ?
 C9 C10 C11 120.8(3) . . ?
 N2 C11 C10 105.0(3) . . ?
 N2 C11 C12 131.5(3) . . ?
 C12 C11 C10 123.3(3) . . ?
 C11 C12 C15 122.6(3) . . ?
 C13 C12 C11 114.8(3) . . ?
 C13 C12 C15 122.6(3) . . ?
 C12 C13 C14 123.0(3) . . ?
 C9 C14 C13 122.2(3) . . ?
 C16 C15 C12 120.8(3) . . ?
 C16 C15 C20 118.3(3) . . ?
 C20 C15 C12 120.9(3) . . ?
 C17 C16 C15 120.8(3) . . ?
 C16 C17 C18 120.4(3) . . ?
 C17 C18 C19 119.3(3) . . ?
 C17 C18 C21 118.4(3) . . ?
 C19 C18 C21 122.3(3) . . ?
 C20 C19 C18 120.4(3) . . ?
 C19 C20 C15 120.8(3) . . ?
 O3 C21 O4 123.2(3) . . ?
 O3 C21 C18 124.0(3) . . ?
 O4 C21 C18 112.9(3) . . ?
 N1 C23 N2 112.7(3) . . ?
 N1 C23 C24 123.5(3) . . ?
 N2 C23 C24 123.4(3) . . ?
 C25 C24 C23 119.7(3) . . ?
 C29 C24 C23 121.5(3) . . ?
 C29 C24 C25 118.5(3) . . ?
 C26 C25 C24 120.7(3) . . ?
 C25 C26 C27 120.1(3) . . ?
 C26 C27 C30 122.6(3) . . ?
 C28 C27 C26 119.3(3) . . ?
 C28 C27 C30 118.1(3) . . ?
 C29 C28 C27 120.4(3) . . ?
 C28 C29 C24 121.0(3) . . ?
 N3 C30 C27 123.7(3) . . ?
 N4 C30 N3 113.3(3) . . ?
 N4 C30 C27 123.0(3) . . ?
 O5 C32 O6 124.1(4) . . ?
 O5 C32 C33 124.0(4) . . ?
 O6 C32 C33 111.9(3) . . ?
 C34 C33 C32 121.2(3) . . ?
 C38 C33 C32 119.6(3) . . ?
 C38 C33 C34 119.2(3) . . ?
 C35 C34 C33 120.5(3) . . ?
 C34 C35 C36 120.8(3) . . ?
 C35 C36 C37 118.5(3) . . ?
 C35 C36 C39 119.3(3) . . ?
 C37 C36 C39 122.2(3) . . ?
 C38 C37 C36 120.6(3) . . ?
 C37 C38 C33 120.3(3) . . ?
 C40 C39 C36 121.4(3) . . ?
 C40 C39 C44 114.4(3) . . ?
 C44 C39 C36 124.1(3) . . ?
 C41 C40 C39 123.1(3) . . ?
 C40 C41 C42 122.7(3) . . ?
 C41 C42 C43 115.4(3) . . ?
 C41 C42 C45 122.1(3) . . ?
 C43 C42 C45 122.5(3) . . ?
 N4 C43 C42 128.4(3) . . ?
 N4 C43 C44 109.7(3) . . ?
 C42 C43 C44 121.7(3) . . ?
 N3 C44 C39 131.5(3) . . ?
 N3 C44 C43 105.7(3) . . ?
 C39 C44 C43 122.6(3) . . ?
 C46 C45 C42 120.9(3) . . ?
 C46 C45 C50 118.5(3) . . ?
 C50 C45 C42 120.6(3) . . ?
 C47 C46 C45 120.9(3) . . ?
 C46 C47 C48 120.5(4) . . ?
 C47 C48 C51 122.5(3) . . ?
 C49 C48 C47 118.4(3) . . ?
 C49 C48 C51 119.1(3) . . ?
 C50 C49 C48 121.4(3) . . ?
 C49 C50 C45 120.1(3) . . ?
 O7 C51 O8 122.6(4) . . ?
 O7 C51 C48 124.3(4) . . ?
 O8 C51 C48 113.1(3) . . ?
 C61 O9 C60 111.4(3) . . ?
 C65 O10 C64 112.7(4) . . ?
 C63 O11 C62 111.8(3) . . ?
 C66 O12 C1A 109.1(4) . . ?
 C59 O13 C58 111.9(3) . . ?
 C53 O14 C1B 113.1(4) . . ?
 C57 O15 C56 114.5(3) . . ?
 C54 O16 C55 113.4(3) . . ?
 C1B C1A O12 105.7(5) . . ?
 C1A C1B O14 105.3(5) . . ?
 O14 C53 C54 110.4(4) . . ?
 O16 C54 C53 107.7(4) . . ?
 O16 C55 C56 107.8(4) . . ?
 O15 C56 C55 108.9(3) . . ?
 O15 C57 C58 109.7(4) . . ?
 O13 C58 C57 111.7(4) . . ?
 O13 C59 C60 108.4(3) . . ?
 O9 C60 C59 108.2(3) . . ?
 O9 C61 C62 109.9(3) . . ?
 O11 C62 C61 109.6(3) . . ?
 O11 C63 C64 108.3(3) . . ?
 O10 C64 C63 109.7(3) . . ?
 O10 C65 C66 109.4(4) . . ?
 O12 C66 C65 116.3(5) . . ?
 C2S O1S C1C 115.4(4) . . ?
 C3S O2S C4S 115.0(4) . . ?
 O1S C2S C3S 112.6(4) . . ?
 O2S C3S C2S 114.8(4) . . ?

loop_
  _geom_hbond_atom_site_label_D
  _geom_hbond_atom_site_label_H
  _geom_hbond_atom_site_label_A
  _geom_hbond_distance_DH
  _geom_hbond_distance_HA
  _geom_hbond_distance_DA
  _geom_hbond_angle_DHA
  _geom_hbond_site_symmetry_A
 N2 H2 O3 0.88 2.19 3.027(3) 159.2 2_745
 N3 H3 O11 0.88 2.23 3.092(4) 167.1 .
 C22 H22A O12 0.98 2.38 3.338(6) 166.6 1_556

loop_
  _geom_torsion_atom_site_label_1
  _geom_torsion_atom_site_label_2
  _geom_torsion_atom_site_label_3
  _geom_torsion_atom_site_label_4
  _geom_torsion
  _geom_torsion_site_symmetry_1
  _geom_torsion_site_symmetry_2
  _geom_torsion_site_symmetry_3
  _geom_torsion_site_symmetry_4
  _geom_torsion_publ_flag
 O1 C2 C3 C4 168.5(4) . . . . ?
 O1 C2 C3 C8 -10.4(6) . . . . ?
 O2 C2 C3 C4 -11.5(5) . . . . ?
 O2 C2 C3 C8 169.6(3) . . . . ?
 O5 C32 C33 C34 168.5(4) . . . . ?
 O5 C32 C33 C38 -10.0(6) . . . . ?
 O6 C32 C33 C34 -10.5(5) . . . . ?
 O6 C32 C33 C38 171.0(3) . . . . ?
 N1 C10 C11 N2 -0.1(3) . . . . ?
 N1 C10 C11 C12 -175.2(3) . . . . ?
 N1 C23 C24 C25 22.6(5) . . . . ?
 N1 C23 C24 C29 -151.0(3) . . . . ?
 N2 C11 C12 C13 -172.4(3) . . . . ?
 N2 C11 C12 C15 6.9(5) . . . . ?
 N2 C23 C24 C25 -165.8(3) . . . . ?
 N2 C23 C24 C29 20.6(5) . . . . ?
 N4 C43 C44 N3 1.1(3) . . . . ?
 N4 C43 C44 C39 177.6(3) . . . . ?
 C1 O2 C2 O1 -1.1(6) . . . . ?
 C1 O2 C2 C3 178.9(3) . . . . ?
 C2 C3 C4 C5 -179.1(3) . . . . ?
 C2 C3 C8 C7 179.6(3) . . . . ?
 C3 C4 C5 C6 0.1(5) . . . . ?
 C4 C3 C8 C7 0.6(5) . . . . ?
 C4 C5 C6 C7 -0.4(5) . . . . ?
 C4 C5 C6 C9 -179.6(3) . . . . ?
 C5 C6 C7 C8 0.8(5) . . . . ?
 C5 C6 C9 C10 -33.8(4) . . . . ?
 C5 C6 C9 C14 146.6(3) . . . . ?
 C6 C7 C8 C3 -0.9(5) . . . . ?
 C6 C9 C10 N1 -6.4(5) . . . . ?
 C6 C9 C10 C11 178.4(3) . . . . ?
 C6 C9 C14 C13 -179.3(3) . . . . ?
 C7 C6 C9 C10 147.1(3) . . . . ?
 C7 C6 C9 C14 -32.5(5) . . . . ?
 C8 C3 C4 C5 -0.2(5) . . . . ?
 C9 C6 C7 C8 180.0(3) . . . . ?
 C9 C10 C11 N2 176.0(3) . . . . ?
 C9 C10 C11 C12 0.9(5) . . . . ?
 C10 N1 C23 N2 -1.9(3) . . . . ?
 C10 N1 C23 C24 170.5(3) . . . . ?
 C10 C9 C14 C13 1.1(5) . . . . ?
 C10 C11 C12 C13 1.3(4) . . . . ?
 C10 C11 C12 C15 -179.3(3) . . . . ?
 C11 N2 C23 N1 1.9(3) . . . . ?
 C11 N2 C23 C24 -170.5(3) . . . . ?
 C11 C12 C13 C14 -2.3(5) . . . . ?
 C11 C12 C15 C16 47.3(4) . . . . ?
 C11 C12 C15 C20 -132.8(3) . . . . ?
 C12 C13 C14 C9 1.2(5) . . . . ?
 C12 C15 C16 C17 -179.5(3) . . . . ?
 C12 C15 C20 C19 178.8(3) . . . . ?
 C13 C12 C15 C16 -133.4(3) . . . . ?
 C13 C12 C15 C20 46.5(4) . . . . ?
 C14 C9 C10 N1 173.2(3) . . . . ?
 C14 C9 C10 C11 -2.1(4) . . . . ?
 C15 C12 C13 C14 178.4(3) . . . . ?
 C15 C16 C17 C18 0.4(5) . . . . ?
 C16 C15 C20 C19 -1.3(5) . . . . ?
 C16 C17 C18 C19 -1.0(5) . . . . ?
 C16 C17 C18 C21 177.9(3) . . . . ?
 C17 C18 C19 C20 0.3(5) . . . . ?
 C17 C18 C21 O3 4.8(5) . . . . ?
 C17 C18 C21 O4 -176.2(3) . . . . ?
 C18 C19 C20 C15 0.8(5) . . . . ?
 C19 C18 C21 O3 -176.4(3) . . . . ?
 C19 C18 C21 O4 2.6(4) . . . . ?
 C20 C15 C16 C17 0.7(5) . . . . ?
 C21 C18 C19 C20 -178.5(3) . . . . ?
 C22 O4 C21 O3 0.1(5) . . . . ?
 C22 O4 C21 C18 -178.9(3) . . . . ?
 C23 N1 C10 C9 -174.5(3) . . . . ?
 C23 N1 C10 C11 1.2(3) . . . . ?
 C23 N2 C11 C10 -1.0(3) . . . . ?
 C23 N2 C11 C12 173.6(3) . . . . ?
 C23 C24 C25 C26 -171.9(3) . . . . ?
 C23 C24 C29 C28 171.6(3) . . . . ?
 C24 C25 C26 C27 0.5(5) . . . . ?
 C25 C24 C29 C28 -2.1(5) . . . . ?
 C25 C26 C27 C28 -2.7(5) . . . . ?
 C25 C26 C27 C30 175.8(3) . . . . ?
 C26 C27 C28 C29 2.6(5) . . . . ?
 C26 C27 C30 N3 -22.9(5) . . . . ?
 C26 C27 C30 N4 157.6(3) . . . . ?
 C27 C28 C29 C24 -0.1(5) . . . . ?
 C28 C27 C30 N3 155.7(3) . . . . ?
 C28 C27 C30 N4 -23.8(5) . . . . ?
 C29 C24 C25 C26 1.9(5) . . . . ?
 C30 N3 C44 C39 -177.0(3) . . . . ?
 C30 N3 C44 C43 -0.9(3) . . . . ?
 C30 N4 C43 C42 175.7(3) . . . . ?
 C30 N4 C43 C44 -0.8(3) . . . . ?
 C30 C27 C28 C29 -176.1(3) . . . . ?
 C31 O6 C32 O5 0.0(6) . . . . ?
 C31 O6 C32 C33 179.0(4) . . . . ?
 C32 C33 C34 C35 179.2(3) . . . . ?
 C32 C33 C38 C37 -177.9(3) . . . . ?
 C33 C34 C35 C36 0.0(5) . . . . ?
 C34 C33 C38 C37 3.5(5) . . . . ?
 C34 C35 C36 C37 1.0(5) . . . . ?
 C34 C35 C36 C39 -176.8(3) . . . . ?
 C35 C36 C37 C38 0.3(5) . . . . ?
 C35 C36 C39 C40 -43.1(5) . . . . ?
 C35 C36 C39 C44 133.8(3) . . . . ?
 C36 C37 C38 C33 -2.6(5) . . . . ?
 C36 C39 C40 C41 178.5(3) . . . . ?
 C36 C39 C44 N3 -3.2(6) . . . . ?
 C36 C39 C44 C43 -178.7(3) . . . . ?
 C37 C36 C39 C40 139.2(3) . . . . ?
 C37 C36 C39 C44 -43.8(5) . . . . ?
 C38 C33 C34 C35 -2.2(5) . . . . ?
 C39 C36 C37 C38 178.0(3) . . . . ?
 C39 C40 C41 C42 -0.1(5) . . . . ?
 C40 C39 C44 N3 174.0(3) . . . . ?
 C40 C39 C44 C43 -1.5(5) . . . . ?
 C40 C41 C42 C43 -0.7(5) . . . . ?
 C40 C41 C42 C45 -180.0(3) . . . . ?
 C41 C42 C43 N4 -175.8(3) . . . . ?
 C41 C42 C43 C44 0.4(5) . . . . ?
 C41 C42 C45 C46 47.0(5) . . . . ?
 C41 C42 C45 C50 -132.3(4) . . . . ?
 C42 C43 C44 N3 -175.7(3) . . . . ?
 C42 C43 C44 C39 0.8(5) . . . . ?
 C42 C45 C46 C47 -177.9(3) . . . . ?
 C42 C45 C50 C49 176.7(3) . . . . ?
 C43 N4 C30 N3 0.3(4) . . . . ?
 C43 N4 C30 C27 179.8(3) . . . . ?
 C43 C42 C45 C46 -132.2(4) . . . . ?
 C43 C42 C45 C50 48.5(5) . . . . ?
 C44 N3 C30 N4 0.4(4) . . . . ?
 C44 N3 C30 C27 -179.1(3) . . . . ?
 C44 C39 C40 C41 1.2(5) . . . . ?
 C45 C42 C43 N4 3.5(5) . . . . ?
 C45 C42 C43 C44 179.6(3) . . . . ?
 C45 C46 C47 C48 0.6(6) . . . . ?
 C46 C45 C50 C49 -2.6(6) . . . . ?
 C46 C47 C48 C49 -1.5(6) . . . . ?
 C46 C47 C48 C51 178.9(4) . . . . ?
 C47 C48 C49 C50 0.3(6) . . . . ?
 C47 C48 C51 O7 -173.7(4) . . . . ?
 C47 C48 C51 O8 7.5(5) . . . . ?
 C48 C49 C50 C45 1.8(6) . . . . ?
 C49 C48 C51 O7 6.7(6) . . . . ?
 C49 C48 C51 O8 -172.1(4) . . . . ?
 C50 C45 C46 C47 1.4(6) . . . . ?
 C51 C48 C49 C50 179.9(4) . . . . ?
 C52 O8 C51 O7 -0.7(6) . . . . ?
 C52 O8 C51 C48 178.2(3) . . . . ?
 O9 C61 C62 O11 -59.8(5) . . . . ?
 O10 C65 C66 O12 169.3(5) . . . . ?
 O11 C63 C64 O10 -63.2(4) . . . . ?
 O12 C1A C1B O14 174.8(4) . . . . ?
 O13 C59 C60 O9 156.2(3) . . . . ?
 O14 C53 C54 O16 171.9(3) . . . . ?
 O15 C57 C58 O13 -70.2(5) . . . . ?
 O16 C55 C56 O15 -72.3(4) . . . . ?
 C1A O12 C66 C65 -143.5(6) . . . . ?
 C1B O14 C53 C54 -140.2(4) . . . . ?
 C53 O14 C1B C1A 90.8(6) . . . . ?
 C54 O16 C55 C56 165.3(3) . . . . ?
 C55 O16 C54 C53 -177.2(3) . . . . ?
 C56 O15 C57 C58 -149.0(4) . . . . ?
 C57 O15 C56 C55 170.3(4) . . . . ?
 C58 O13 C59 C60 -170.9(3) . . . . ?
 C59 O13 C58 C57 178.7(3) . . . . ?
 C60 O9 C61 C62 169.5(3) . . . . ?
 C61 O9 C60 C59 -177.2(3) . . . . ?
 C62 O11 C63 C64 -168.8(3) . . . . ?
 C63 O11 C62 C61 -164.1(3) . . . . ?
 C64 O10 C65 C66 -166.8(5) . . . . ?
 C65 O10 C64 C63 162.3(4) . . . . ?
 C66 O12 C1A C1B 171.4(5) . . . . ?
 O1S C2S C3S O2S -66.1(7) . . . . ?
 C1C O1S C2S C3S -176.5(5) . . . . ?
 C4S O2S C3S C2S -173.6(5) . . . . ?

_shelx_res_file
;
TITL MIM_LINKER_4 in P-1
CELL 1.54178 12.6007 16.0006 17.3353 106.0735 101.0732 92.406
ZERR 2 0.0004 0.0005 0.0005 0.0015 0.0016 0.0016
LATT 1

SFAC C H N O
UNIT 144 160 8 36
EQIV $1 2-X,-1-Y,-Z
EQIV $2 +X,+Y,1+Z

L.S. 40
PLAN  1
TEMP -100
HTAB N2 O3_$1
HTAB N3 O11
HTAB C22 O12_$2
BOND
MORE -1
CONF
fmap 2
ACTA
OMIT -8 1 1
OMIT 0 -4 1
OMIT 4 -2 4
OMIT 1 -3 1
OMIT -4 -3 7
OMIT -12 -1 8
OMIT 1 -4 14
OMIT 2 -2 2

WGHT    0.101800    4.683599
FVAR       0.07222
O1    4    1.985075   -0.736248   -0.220824    11.00000    0.03081    0.08726 =
         0.05281    0.01593    0.01650    0.01552
O2    4    1.855266   -0.770384   -0.335792    11.00000    0.03870    0.05564 =
         0.03835    0.00337    0.01866    0.00796
O3    4    0.911186   -0.530472    0.119253    11.00000    0.02334    0.04994 =
         0.03742    0.01956    0.00887    0.00641
O4    4    1.034242   -0.477401    0.237321    11.00000    0.02892    0.04864 =
         0.03426    0.00535    0.01193    0.00300
O5    4    1.818242   -0.208977   -0.576991    11.00000    0.03878    0.10510 =
         0.06792    0.03876    0.01822    0.02920
O6    4    1.697439   -0.218986   -0.693069    11.00000    0.04118    0.08123 =
         0.04620    0.01000    0.01359    0.02321
O7    4    0.821605    0.044514   -0.161448    11.00000    0.08421    0.12746 =
         0.04933    0.01827    0.03322    0.04707
O8    4    0.724712    0.025086   -0.287623    11.00000    0.04800    0.07517 =
         0.06501    0.03946    0.02936    0.02933
N1    3    1.454701   -0.558137   -0.173671    11.00000    0.02179    0.02665 =
         0.02385    0.01196    0.00484    0.00479
N2    3    1.316776   -0.524455   -0.110367    11.00000    0.01938    0.02742 =
         0.02692    0.01306    0.00863    0.00861
AFIX  43
H2    2    1.257118   -0.501665   -0.099320    11.00000   -1.20000
AFIX   0
N3    3    1.372635   -0.230065   -0.379607    11.00000    0.02372    0.02814 =
         0.02893    0.01348    0.00746    0.00773
AFIX  43
H3    2    1.427805   -0.258283   -0.393362    11.00000   -1.20000
AFIX   0
N4    3    1.228205   -0.195715   -0.322743    11.00000    0.02592    0.02989 =
         0.02851    0.01519    0.00278    0.00327
C1    1    1.935974   -0.794061   -0.385179    11.00000    0.05093    0.06030 =
         0.05032    0.00538    0.02953    0.00868
AFIX 137
H1A   2    1.976632   -0.839305   -0.368492    11.00000   -1.50000
H1B   2    1.986120   -0.742421   -0.377197    11.00000   -1.50000
H1C   2    1.899776   -0.816476   -0.443262    11.00000   -1.50000
AFIX   0
C2    1    1.890922   -0.742016   -0.254788    11.00000    0.02942    0.03913 =
         0.04458    0.01320    0.01300    0.00942
C3    1    1.800707   -0.718317   -0.211210    11.00000    0.02852    0.02747 =
         0.03535    0.00965    0.01062    0.00425
C4    1    1.697886   -0.711688   -0.253496    11.00000    0.03333    0.03154 =
         0.02718    0.00801    0.00748    0.00708
AFIX  43
H4    2    1.684138   -0.723204   -0.311489    11.00000   -1.20000
AFIX   0
C5    1    1.615374   -0.688608   -0.212476    11.00000    0.02293    0.03035 =
         0.02822    0.00942    0.00235    0.00744
AFIX  43
H5    2    1.545383   -0.684539   -0.242678    11.00000   -1.20000
AFIX   0
C6    1    1.632657   -0.671067   -0.127287    11.00000    0.02658    0.02304 =
         0.02940    0.01134    0.00674    0.00543
C7    1    1.736387   -0.678376   -0.085502    11.00000    0.02791    0.04260 =
         0.02851    0.01270    0.00599    0.01038
AFIX  43
H7    2    1.750232   -0.667563   -0.027581    11.00000   -1.20000
AFIX   0
C8    1    1.819651   -0.701052   -0.126592    11.00000    0.02331    0.04636 =
         0.03563    0.01363    0.00211    0.01073
AFIX  43
H8    2    1.889977   -0.704790   -0.096709    11.00000   -1.20000
AFIX   0
C9    1    1.542938   -0.646942   -0.084150    11.00000    0.02382    0.02170 =
         0.02634    0.00883    0.00530    0.00347
C10   1    1.461751   -0.597803   -0.111550    11.00000    0.02199    0.02367 =
         0.02445    0.01066    0.00664    0.00345
C11   1    1.375441   -0.577375   -0.070958    11.00000    0.02250    0.02159 =
         0.02524    0.00982    0.00483    0.00386
C12   1    1.364990   -0.602719   -0.001472    11.00000    0.02551    0.02434 =
         0.02659    0.01090    0.00800    0.00233
C13   1    1.448163   -0.648491    0.026065    11.00000    0.02973    0.03146 =
         0.02741    0.01766    0.00779    0.00538
AFIX  43
H13   2    1.446806   -0.665473    0.074245    11.00000   -1.20000
AFIX   0
C14   1    1.533730   -0.670683   -0.013891    11.00000    0.02616    0.02943 =
         0.02923    0.01398    0.00354    0.00729
AFIX  43
H14   2    1.587460   -0.703021    0.007475    11.00000   -1.20000
AFIX   0
C15   1    1.273290   -0.581550    0.039934    11.00000    0.02953    0.02656 =
         0.02747    0.01766    0.01041    0.00476
C16   1    1.166317   -0.595662   -0.005216    11.00000    0.02764    0.03227 =
         0.02573    0.01149    0.00600    0.00148
AFIX  43
H16   2    1.152281   -0.619642   -0.063240    11.00000   -1.20000
AFIX   0
C17   1    1.080606   -0.575126    0.033581    11.00000    0.02402    0.03834 =
         0.03257    0.01734    0.00576    0.00355
AFIX  43
H17   2    1.008266   -0.585486    0.002085    11.00000   -1.20000
AFIX   0
C18   1    1.099574   -0.539569    0.118022    11.00000    0.02523    0.02680 =
         0.03059    0.01379    0.01037    0.00141
C19   1    1.205800   -0.525910    0.163655    11.00000    0.02785    0.03574 =
         0.02469    0.01141    0.00683    0.00424
AFIX  43
H19   2    1.219467   -0.501834    0.221658    11.00000   -1.20000
AFIX   0
C20   1    1.291200   -0.547075    0.125254    11.00000    0.01997    0.03654 =
         0.03139    0.01614    0.00495    0.00216
AFIX  43
H20   2    1.363210   -0.538119    0.157184    11.00000   -1.20000
AFIX   0
C21   1    1.005156   -0.515737    0.156618    11.00000    0.02965    0.03221 =
         0.03379    0.01554    0.01176    0.00430
C22   1    0.946470   -0.454033    0.278856    11.00000    0.03833    0.06494 =
         0.04489    0.00161    0.02204    0.01292
AFIX 137
H22A  2    0.976171   -0.425031    0.337268    11.00000   -1.50000
H22B  2    0.899700   -0.506911    0.272923    11.00000   -1.50000
H22C  2    0.903795   -0.414252    0.254647    11.00000   -1.50000
AFIX   0
C23   1    1.369487   -0.514209   -0.170190    11.00000    0.01816    0.02474 =
         0.02275    0.00794    0.00598    0.00243
C24   1    1.341905   -0.452237   -0.217016    11.00000    0.01841    0.02319 =
         0.02555    0.01101    0.00567    0.00401
C25   1    1.381577   -0.458942   -0.288135    11.00000    0.03338    0.03154 =
         0.02997    0.01342    0.01403    0.01444
AFIX  43
H25   2    1.418285   -0.508005   -0.309477    11.00000   -1.20000
AFIX   0
C26   1    1.367977   -0.394824   -0.327892    11.00000    0.03396    0.03798 =
         0.02950    0.01739    0.01606    0.01325
AFIX  43
H26   2    1.394780   -0.400308   -0.376495    11.00000   -1.20000
AFIX   0
C27   1    1.315033   -0.322294   -0.296685    11.00000    0.01922    0.02660 =
         0.02631    0.01054    0.00248    0.00360
C28   1    1.272204   -0.317071   -0.227568    11.00000    0.02472    0.02710 =
         0.02638    0.01050    0.00795    0.00808
AFIX  43
H28   2    1.233397   -0.269015   -0.207211    11.00000   -1.20000
AFIX   0
C29   1    1.285654   -0.381077   -0.188429    11.00000    0.02444    0.03465 =
         0.02450    0.01525    0.01148    0.00819
AFIX  43
H29   2    1.256073   -0.376600   -0.141163    11.00000   -1.20000
AFIX   0
C30   1    1.304512   -0.249552   -0.332815    11.00000    0.02260    0.02542 =
         0.02362    0.01090    0.00174    0.00279
C31   1    1.780734   -0.243364   -0.739848    11.00000    0.05994    0.12484 =
         0.05825    0.01440    0.02711    0.04783
AFIX 137
H31A  2    1.747047   -0.264866   -0.798494    11.00000   -1.50000
H31B  2    1.818902   -0.289470   -0.722687    11.00000   -1.50000
H31C  2    1.832615   -0.192251   -0.730018    11.00000   -1.50000
AFIX   0
C32   1    1.727674   -0.203670   -0.612140    11.00000    0.03575    0.03955 =
         0.05458    0.01894    0.01330    0.01076
C33   1    1.636930   -0.177702   -0.570076    11.00000    0.03137    0.02567 =
         0.04546    0.01489    0.00882    0.00172
C34   1    1.539762   -0.157710   -0.611808    11.00000    0.03394    0.03515 =
         0.03577    0.01523    0.00701    0.00314
AFIX  43
H34   2    1.531397   -0.159980   -0.668016    11.00000   -1.20000
AFIX   0
C35   1    1.456116   -0.134780   -0.572320    11.00000    0.02987    0.03259 =
         0.03639    0.01773    0.00413    0.00198
AFIX  43
H35   2    1.390417   -0.121296   -0.601510    11.00000   -1.20000
AFIX   0
C36   1    1.466473   -0.131053   -0.489869    11.00000    0.02985    0.02187 =
         0.03489    0.01319    0.00584   -0.00187
C37   1    1.564793   -0.149892   -0.447920    11.00000    0.03789    0.03207 =
         0.03520    0.01846    0.00586    0.00102
AFIX  43
H37   2    1.573272   -0.147972   -0.391786    11.00000   -1.20000
AFIX   0
C38   1    1.649574   -0.171243   -0.487415    11.00000    0.02874    0.03452 =
         0.04703    0.01969    0.00226    0.00576
AFIX  43
H38   2    1.716884   -0.181547   -0.457725    11.00000   -1.20000
AFIX   0
C39   1    1.372991   -0.110794   -0.450657    11.00000    0.03011    0.02698 =
         0.03025    0.01326    0.00289    0.00019
C40   1    1.309025   -0.044661   -0.463941    11.00000    0.03677    0.03055 =
         0.03690    0.01911    0.00677    0.00223
AFIX  43
H40   2    1.328193   -0.011677   -0.498015    11.00000   -1.20000
AFIX   0
C41   1    1.219233   -0.025020   -0.429837    11.00000    0.03494    0.02676 =
         0.03745    0.01578    0.00430    0.00475
AFIX  43
H41   2    1.179534    0.020839   -0.441393    11.00000   -1.20000
AFIX   0
C42   1    1.184682   -0.069686   -0.379298    11.00000    0.03065    0.02865 =
         0.03053    0.01019    0.00518    0.00200
C43   1    1.246513   -0.137063   -0.365819    11.00000    0.02749    0.02530 =
         0.02496    0.01085   -0.00013   -0.00225
C44   1    1.337314   -0.157084   -0.400931    11.00000    0.02498    0.02184 =
         0.02746    0.00890    0.00180    0.00030
C45   1    1.088374   -0.048013   -0.343233    11.00000    0.03392    0.02405 =
         0.03457    0.01137    0.00556    0.00381
C46   1    0.991392   -0.036678   -0.391161    11.00000    0.04049    0.05436 =
         0.03671    0.02396    0.01316    0.01908
AFIX  43
H46   2    0.986079   -0.044879   -0.448234    11.00000   -1.20000
AFIX   0
C47   1    0.903159   -0.013806   -0.357246    11.00000    0.04077    0.05768 =
         0.04297    0.02833    0.00941    0.01806
AFIX  43
H47   2    0.837256   -0.006931   -0.391111    11.00000   -1.20000
AFIX   0
C48   1    0.909378   -0.000635   -0.273922    11.00000    0.04040    0.03243 =
         0.03895    0.01152    0.01392    0.01026
C49   1    1.005661   -0.013156   -0.226503    11.00000    0.04924    0.05690 =
         0.02920    0.00728    0.00722    0.00869
AFIX  43
H49   2    1.010940   -0.004631   -0.169388    11.00000   -1.20000
AFIX   0
C50   1    1.093527   -0.037589   -0.260197    11.00000    0.03401    0.05180 =
         0.03131    0.00919   -0.00026    0.00406
AFIX  43
H50   2    1.158085   -0.047426   -0.226768    11.00000   -1.20000
AFIX   0
C51   1    0.816489    0.025762   -0.233994    11.00000    0.05749    0.04039 =
         0.05307    0.01641    0.02153    0.01848
C52   1    0.632092    0.047654   -0.251601    11.00000    0.06341    0.09005 =
         0.09575    0.06102    0.05532    0.04418
AFIX 137
H52A  2    0.566537    0.037262   -0.295206    11.00000   -1.50000
H52B  2    0.642959    0.109505   -0.219709    11.00000   -1.50000
H52C  2    0.623735    0.011555   -0.215370    11.00000   -1.50000
AFIX   0

O9    4    1.605610   -0.255842   -0.276891    11.00000    0.06282    0.05954 =
         0.04408    0.02810    0.00821    0.00150
O10   4    1.338528   -0.421870   -0.545886    11.00000    0.06424    0.05811 =
         0.05724    0.02958    0.01006    0.01249
O11   4    1.539033   -0.355000   -0.441116    11.00000    0.04824    0.05916 =
         0.03813    0.01974    0.01708    0.00688
O12   4    1.066340   -0.386005   -0.522215    11.00000    0.10881    0.11782 =
         0.06565    0.04259    0.04818    0.04654
O13   4    1.477060   -0.167975   -0.109741    11.00000    0.05852    0.05276 =
         0.04319    0.01741   -0.00134   -0.00005
O14   4    0.908311   -0.327334   -0.364864    11.00000    0.06839    0.08351 =
         0.06188    0.00704    0.02522   -0.01674
O15   4    1.266314   -0.174374   -0.064132    11.00000    0.06024    0.05549 =
         0.06228   -0.01177    0.01004    0.01210
O16   4    1.047965   -0.212745   -0.158616    11.00000    0.06104    0.05169 =
         0.05900    0.01477    0.01385    0.01461
C1A   1    1.036169   -0.377798   -0.442856    11.00000    0.08513    0.07985 =
         0.11536    0.02875   -0.01149   -0.01360
AFIX  23
H1AA  2    1.016661   -0.436154   -0.437379    11.00000   -1.20000
H1AB  2    1.097154   -0.347444   -0.396913    11.00000   -1.20000
AFIX   0
C1B   1    0.945238   -0.328168   -0.442661    11.00000    0.11015    0.09023 =
         0.08987    0.02133   -0.00792    0.00930
AFIX  23
H1BA  2    0.886648   -0.355733   -0.491398    11.00000   -1.20000
H1BB  2    0.966338   -0.267948   -0.442887    11.00000   -1.20000
AFIX   0
C53   1    0.957941   -0.255533   -0.297317    11.00000    0.05153    0.05374 =
         0.06110    0.01006    0.01707   -0.00345
AFIX  23
H53A  2    0.907928   -0.209261   -0.289489    11.00000   -1.20000
H53B  2    1.024944   -0.231061   -0.308453    11.00000   -1.20000
AFIX   0
C54   1    0.985563   -0.283489   -0.220836    11.00000    0.04336    0.05856 =
         0.06310    0.01577    0.01605   -0.00167
AFIX  23
H54A  2    0.918301   -0.299528   -0.204415    11.00000   -1.20000
H54B  2    1.027491   -0.334982   -0.230473    11.00000   -1.20000
AFIX   0
C55   1    1.084136   -0.232174   -0.083132    11.00000    0.06313    0.06379 =
         0.05071    0.02394    0.02347    0.02655
AFIX  23
H55A  2    1.112836   -0.289998   -0.093461    11.00000   -1.20000
H55B  2    1.022996   -0.233649   -0.055045    11.00000   -1.20000
AFIX   0
C56   1    1.170782   -0.162920   -0.031294    11.00000    0.07527    0.05734 =
         0.04906    0.00606    0.02245    0.03012
AFIX  23
H56A  2    1.146776   -0.104627   -0.030542    11.00000   -1.20000
H56B  2    1.186223   -0.166624    0.025790    11.00000   -1.20000
AFIX   0
C57   1    1.349387   -0.104876   -0.028477    11.00000    0.07117    0.05537 =
         0.05706   -0.00404    0.00373    0.00611
AFIX  23
H57A  2    1.398011   -0.115922    0.019006    11.00000   -1.20000
H57B  2    1.317108   -0.049693   -0.008472    11.00000   -1.20000
AFIX   0
C58   1    1.412806   -0.096715   -0.090380    11.00000    0.07633    0.03917 =
         0.05566    0.00425   -0.00874    0.00042
AFIX  23
H58A  2    1.362296   -0.094748   -0.141059    11.00000   -1.20000
H58B  2    1.460929   -0.041207   -0.068870    11.00000   -1.20000
AFIX   0
C59   1    1.535651   -0.161572   -0.169848    11.00000    0.06582    0.05826 =
         0.04006    0.01988   -0.00791   -0.01305
AFIX  23
H59A  2    1.592955   -0.111790   -0.146854    11.00000   -1.20000
H59B  2    1.486248   -0.151609   -0.217541    11.00000   -1.20000
AFIX   0
C60   1    1.586637   -0.246365   -0.196689    11.00000    0.06160    0.07062 =
         0.03497    0.03016   -0.00085   -0.00064
AFIX  23
H60A  2    1.656021   -0.244848   -0.157922    11.00000   -1.20000
H60B  2    1.537229   -0.296412   -0.197281    11.00000   -1.20000
AFIX   0
C61   1    1.648577   -0.335867   -0.307738    11.00000    0.04037    0.07727 =
         0.06111    0.04647    0.01234    0.01430
AFIX  23
H61A  2    1.604308   -0.384483   -0.300270    11.00000   -1.20000
H61B  2    1.723866   -0.333835   -0.276878    11.00000   -1.20000
AFIX   0
C62   1    1.648054   -0.351365   -0.396563    11.00000    0.04293    0.06723 =
         0.06190    0.03773    0.02154    0.01345
AFIX  23
H62A  2    1.693832   -0.303566   -0.403979    11.00000   -1.20000
H62B  2    1.678582   -0.407084   -0.417849    11.00000   -1.20000
AFIX   0
C63   1    1.529250   -0.392505   -0.526869    11.00000    0.07262    0.04378 =
         0.04157    0.01723    0.03208    0.00574
AFIX  23
H63A  2    1.536623   -0.455947   -0.539234    11.00000   -1.20000
H63B  2    1.587241   -0.365001   -0.545785    11.00000   -1.20000
AFIX   0
C64   1    1.421161   -0.377816   -0.569491    11.00000    0.09507    0.03942 =
         0.03341    0.01483    0.01768    0.00633
AFIX  23
H64A  2    1.413038   -0.314419   -0.555123    11.00000   -1.20000
H64B  2    1.414442   -0.399869   -0.629682    11.00000   -1.20000
AFIX   0
C65   1    1.237038   -0.391054   -0.563667    11.00000    0.07928    0.09877 =
         0.06086    0.03817    0.01925    0.03812
AFIX  23
H65A  2    1.207320   -0.411070   -0.623654    11.00000   -1.20000
H65B  2    1.244942   -0.326335   -0.545725    11.00000   -1.20000
AFIX   0
C66   1    1.164953   -0.422962   -0.522297    11.00000    0.04918    0.16482 =
         0.09677    0.06968    0.00946    0.00674
AFIX  23
H66A  2    1.148778   -0.486876   -0.547741    11.00000   -1.20000
H66B  2    1.203030   -0.413361   -0.464549    11.00000   -1.20000
AFIX   0

O1S   4    1.783137   -0.089549    0.004740    11.00000    0.10810    0.06340 =
         0.15665    0.04352    0.08466    0.03204
O2S   4    1.689195   -0.079147    0.146930    11.00000    0.05750    0.06238 =
         0.09578   -0.00252    0.01753   -0.00586
C1C   1    1.865629   -0.094478   -0.038926    11.00000    0.08473    0.07127 =
         0.15351    0.01597    0.07168    0.02071
AFIX 137
H1CA  2    1.935900   -0.091289   -0.001774    11.00000   -1.50000
H1CB  2    1.865532   -0.045711   -0.062870    11.00000   -1.50000
H1CC  2    1.853559   -0.149906   -0.082890    11.00000   -1.50000
AFIX   0
C2S   1    1.772512   -0.155576    0.039655    11.00000    0.06591    0.04724 =
         0.09328    0.01632    0.00920    0.00730
AFIX  23
H2SA  2    1.840055   -0.153831    0.080395    11.00000   -1.20000
H2SB  2    1.763025   -0.212427   -0.003440    11.00000   -1.20000
AFIX   0
C3S   1    1.679761   -0.149361    0.080487    11.00000    0.08607    0.06442 =
         0.07998    0.01660    0.01331   -0.01361
AFIX  23
H3SA  2    1.613192   -0.147717    0.040144    11.00000   -1.20000
H3SB  2    1.670298   -0.202895    0.097519    11.00000   -1.20000
AFIX   0
C4S   1    1.606716   -0.077702    0.190934    11.00000    0.05992    0.09111 =
         0.07436    0.02827    0.01512   -0.00530
AFIX 137
H4SA  2    1.623898   -0.028122    0.240942    11.00000   -1.50000
H4SB  2    1.601059   -0.132269    0.205810    11.00000   -1.50000
H4SC  2    1.537446   -0.071703    0.156858    11.00000   -1.50000
AFIX   0
HKLF 4

REM  MIM_LINKER_4 in P-1
REM R1 =  0.0771 for    7653 Fo > 4sig(Fo)  and  0.1118 for all   10914 data
REM    853 parameters refined using      0 restraints

END

WGHT      0.1015      4.7044

REM Highest difference peak  0.761,  deepest hole -0.524,  1-sigma level  0.074
Q1    1   0.9996 -0.3309 -0.4841  11.00000  0.05    0.76
;
_shelx_res_checksum               92646
_shelx_hkl_file
;
  -1   0   0   16.19    1.32
   1   0   0   16.37    1.54
  -2   0   0    0.36    0.04
   2   0   0    0.44    0.04
   2   0   0    0.27    0.04
   2   0   0    0.35    0.04
   3   0   0   61.34    4.98
  -4   0   0    1.29    0.12
   4   0   0    1.29    0.12
   4   0   0    1.50    0.16
  -5   0   0    0.09    0.05
  -5   0   0    0.09    0.04
  -5   0   0    0.01    0.05
  -5   0   0    0.07    0.05
   5   0   0    0.20    0.05
   5   0   0    0.13    0.06
   5   0   0    0.20    0.08
   5   0   0    0.01    0.06
   5   0   0    0.12    0.04
   5   0   0    0.14    0.07
  -6   0   0    1.88    0.17
  -6   0   0    1.42    0.16
  -6   0   0    1.62    0.21
  -6   0   0    1.49    0.18
   6   0   0    1.60    0.18
   6   0   0    1.65    0.18
  -7   0   0    4.48    0.40
   7   0   0    4.54    0.42
   7   0   0    4.81    0.44
   7   0   0    4.53    0.43
  -8   0   0    0.83    0.15
  -8   0   0    0.74    0.14
   8   0   0    1.02    0.14
   8   0   0    0.70    0.13
   8   0   0    0.91    0.14
  -9   0   0    0.23    0.11
  -9   0   0    0.44    0.11
  -9   0   0    0.29    0.20
   9   0   0    0.68    0.13
   9   0   0    0.43    0.17
   9   0   0    0.58    0.12
 -10   0   0    0.10    0.13
 -10   0   0    0.12    0.11
 -10   0   0    0.10    0.11
  10   0   0    0.08    0.13
  10   0   0    0.10    0.11
 -12   0   0    2.50    0.30
 -12   0   0    1.91    0.28
  12   0   0    1.91    0.29
  12   0   0    2.41    0.28
  12   0   0    1.91    0.31
 -13   0   0    2.85    0.37
 -13   0   0    3.10    0.40
  13   0   0    3.84    0.37
 -14   0   0    0.69    0.19
 -14   0   0    0.49    0.20
  14   0   0    0.44    0.15
  14  -1   0    0.20    0.14
 -14   1   0    0.07    0.16
 -14   1   0    0.26    0.21
  13  -1   0    0.34    0.13
  13  -1   0    0.38    0.23
 -13   1   0    0.42    0.15
 -13   1   0    0.05    0.19
  12  -1   0    1.78    0.25
  12  -1   0    1.69    0.24
 -12   1   0    1.47    0.25
 -12   1   0    1.75    0.27
  11  -1   0    1.99    0.26
 -11   1   0    1.53    0.22
 -11   1   0    1.90    0.26
 -11   1   0    2.07    0.25
  10  -1   0    3.62    0.37
  10  -1   0    2.87    0.34
 -10   1   0    3.22    0.38
 -10   1   0    3.67    0.35
   9  -1   0    0.33    0.15
   9  -1   0    0.24    0.11
   9  -1   0    0.02    0.09
  -9   1   0   -0.11    0.16
  -9   1   0    0.21    0.10
  -9   1   0    0.20    0.10
  -9   1   0    0.29    0.09
   8  -1   0    0.69    0.11
   8  -1   0    0.47    0.11
   8  -1   0    0.61    0.12
  -8   1   0    0.82    0.12
  -8   1   0    0.38    0.12
  -8   1   0    0.36    0.10
  -8   1   0    0.52    0.09
   7  -1   0    2.22    0.22
  -7   1   0    1.64    0.24
  -7   1   0    2.39    0.21
  -7   1   0    2.14    0.21
   6  -1   0    0.41    0.10
   6  -1   0    0.28    0.06
   6  -1   0    0.13    0.09
   6  -1   0    0.29    0.06
   6  -1   0    0.13    0.10
  -6   1   0    0.08    0.10
  -6   1   0    0.19    0.05
  -6   1   0    0.15    0.09
   5  -1   0    0.99    0.15
   5  -1   0    1.13    0.11
   5  -1   0    1.06    0.12
  -5   1   0    1.18    0.13
  -5   1   0    0.97    0.11
  -5   1   0    1.22    0.14
   4  -1   0    2.99    0.27
   4  -1   0    2.84    0.27
   4  -1   0    2.81    0.24
  -4   1   0    2.69    0.24
  -4   1   0    2.60    0.25
   3  -1   0   11.44    1.12
  -3   1   0   12.20    0.97
  -2   1   0   69.12    5.54
  -2   1   0   67.47    6.47
   0   1   0    6.94    0.56
  -2  -1   0    3.68    0.32
   2   1   0    4.09    0.32
  -4  -1   0    7.67    0.65
   4   1   0    7.93    0.75
  -5  -1   0    1.72    0.19
  -5  -1   0    2.00    0.18
  -5  -1   0    2.03    0.20
   5   1   0    2.21    0.19
   5   1   0    2.00    0.18
  -6  -1   0    0.84    0.16
  -6  -1   0    0.94    0.12
   6   1   0    0.91    0.16
   6   1   0    0.76    0.12
   6   1   0    1.05    0.12
   6   1   0    1.08    0.12
   6   1   0    0.93    0.13
  -7  -1   0    0.08    0.09
  -7  -1   0    0.18    0.08
  -7  -1   0    0.13    0.08
  -7  -1   0    0.15    0.06
   7   1   0    0.00    0.08
   7   1   0    0.13    0.08
   7   1   0    0.07    0.08
   7   1   0    0.12    0.07
   7   1   0    0.14    0.07
  -8  -1   0    0.60    0.12
  -8  -1   0    0.64    0.13
  -8  -1   0    0.91    0.14
   8   1   0    0.81    0.12
   8   1   0    0.84    0.16
   8   1   0    1.09    0.15
   8   1   0    0.68    0.13
   8   1   0    0.95    0.14
  -9  -1   0    1.33    0.21
  -9  -1   0    1.70    0.23
   9   1   0    1.83    0.22
   9   1   0    1.85    0.25
   9   1   0    1.83    0.23
   9   1   0    2.08    0.31
 -10  -1   0    0.53    0.15
 -10  -1   0    0.40    0.14
  10   1   0    0.44    0.14
  10   1   0    0.26    0.13
 -11  -1   0    0.29    0.15
 -11  -1   0    0.23    0.14
  11   1   0    0.23    0.12
  11   1   0    0.30    0.15
 -12  -1   0    0.49    0.16
 -12  -1   0    0.43    0.16
  12   1   0    0.28    0.18
  12   1   0    0.58    0.15
 -13  -1   0   -0.02    0.15
 -13  -1   0    0.19    0.15
  13   1   0    0.12    0.13
  13   1   0    0.26    0.26
 -14  -1   0    0.04    0.16
 -14  -1   0    0.18    0.21
  14   1   0    0.05    0.14
 -14   2   0    0.06    0.14
  13  -2   0   -0.15    0.18
  13  -2   0    0.11    0.12
 -13   2   0    0.08    0.20
 -13   2   0    0.02    0.13
  12  -2   0    0.20    0.15
  12  -2   0    0.34    0.12
 -12   2   0    0.66    0.20
 -12   2   0    0.23    0.15
  11  -2   0    2.52    0.30
  11  -2   0    2.23    0.35
 -11   2   0    2.75    0.36
 -11   2   0    2.58    0.30
  10  -2   0    6.85    0.71
 -10   2   0    7.88    0.67
 -10   2   0    7.14    0.69
 -10   2   0    7.45    0.72
   9  -2   0   -0.04    0.08
   9  -2   0   -0.07    0.12
  -9   2   0   -0.16    0.14
  -9   2   0    0.02    0.09
  -9   2   0   -0.11    0.11
  -9   2   0    0.15    0.08
   8  -2   0    2.79    0.27
   8  -2   0    2.76    0.26
   8  -2   0    2.28    0.27
  -8   2   0    2.28    0.28
  -8   2   0    2.46    0.24
  -8   2   0    2.14    0.25
  -8   2   0    2.05    0.23
   7  -2   0    3.69    0.34
   7  -2   0    3.90    0.37
   7  -2   0    3.66    0.36
   7  -2   0    3.34    0.36
   6  -2   0    1.08    0.14
   6  -2   0    0.79    0.12
   6  -2   0    0.86    0.11
   6  -2   0    0.98    0.13
   6  -2   0    0.81    0.13
  -6   2   0    1.16    0.14
  -6   2   0    0.81    0.11
  -6   2   0    0.83    0.13
   5  -2   0    3.00    0.28
   5  -2   0    2.60    0.24
   5  -2   0    2.81    0.28
   5  -2   0    2.55    0.27
  -5   2   0    2.55    0.25
  -5   2   0    2.51    0.25
   4  -2   0    1.33    0.15
   4  -2   0    1.46    0.13
  -4   2   0    1.68    0.15
   2  -2   0    1.94    0.16
   2  -2   0    1.84    0.18
  -2   2   0    1.80    0.16
  -2   2   0    1.79    0.16
   1  -2   0   16.12    1.30
  -1   2   0   15.88    1.52
   0  -2   0    1.76    0.14
   0  -2   0    1.87    0.14
   0   2   0    1.74    0.15
   0   2   0    1.70    0.15
   1   2   0    9.73    0.80
  -2  -2   0    4.78    0.39
   2   2   0    4.58    0.39
  -4  -2   0    9.67    0.88
   4   2   0    9.71    0.86
  -5  -2   0    0.57    0.09
  -5  -2   0    0.44    0.07
  -5  -2   0    0.30    0.08
  -5  -2   0    0.49    0.09
   5   2   0    0.50    0.07
   5   2   0    0.46    0.09
   5   2   0    0.40    0.07
   5   2   0    0.56    0.08
  -6  -2   0    0.13    0.07
  -6  -2   0    0.11    0.06
  -6  -2   0    0.27    0.07
   6   2   0    0.16    0.06
   6   2   0    0.10    0.05
   6   2   0    0.19    0.14
   6   2   0    0.17    0.09
   6   2   0    0.09    0.06
  -7  -2   0    0.67    0.11
  -7  -2   0    0.50    0.10
   7   2   0    0.49    0.11
   7   2   0    0.73    0.10
   7   2   0    0.57    0.11
   7   2   0    0.83    0.11
   7   2   0    0.48    0.11
  -8  -2   0    3.85    0.40
  -8  -2   0    4.56    0.41
   8   2   0    4.17    0.39
   8   2   0    3.70    0.44
   8   2   0    4.44    0.41
  -9  -2   0    2.75    0.34
  -9  -2   0    3.43    0.37
   9   2   0    3.45    0.33
   9   2   0    2.85    0.33
   9   2   0    3.68    0.36
 -10  -2   0    0.24    0.12
 -10  -2   0   -0.23    0.12
  10   2   0   -0.08    0.11
  10   2   0    0.29    0.13
 -11  -2   0    0.57    0.15
 -11  -2   0    0.15    0.13
  11   2   0    0.39    0.16
  11   2   0    0.18    0.13
 -12  -2   0    0.16    0.15
 -12  -2   0    0.27    0.16
  12   2   0    0.41    0.15
  12   2   0    0.14    0.16
 -13  -2   0    0.36    0.15
  13   2   0   -0.04    0.14
 -14  -2   0    0.18    0.15
  14   2   0    0.36    0.15
  14  -3   0    0.47    0.24
  14  -3   0    0.42    0.13
 -14   3   0    0.49    0.15
  13  -3   0    0.58    0.13
  13  -3   0    0.24    0.18
 -13   3   0    0.47    0.14
 -13   3   0    0.14    0.21
 -13   3   0    0.74    0.28
  12  -3   0   -0.21    0.14
  12  -3   0   -0.05    0.11
 -12   3   0    0.04    0.12
 -12   3   0    0.26    0.25
  11  -3   0    5.62    0.52
 -11   3   0    5.74    0.49
 -11   3   0    4.52    0.51
 -11   3   0    4.67    0.58
  10  -3   0    3.29    0.35
 -10   3   0    3.24    0.32
 -10   3   0    2.77    0.39
   9  -3   0    0.70    0.14
   9  -3   0    0.49    0.17
   9  -3   0    0.55    0.11
   9  -3   0    0.48    0.18
   9  -3   0    0.36    0.17
  -9   3   0    0.58    0.12
  -9   3   0    0.18    0.16
  -9   3   0    0.29    0.09
   8  -3   0    0.19    0.10
   8  -3   0    0.13    0.12
   8  -3   0    0.17    0.12
   8  -3   0    0.16    0.08
   8  -3   0    0.16    0.10
  -8   3   0    0.09    0.08
  -8   3   0    0.07    0.09
  -8   3   0    0.19    0.07
  -8   3   0    0.17    0.12
   7  -3   0    4.55    0.42
   7  -3   0    3.75    0.40
   7  -3   0    4.06    0.41
  -7   3   0    4.39    0.43
  -7   3   0    4.42    0.38
   6  -3   0   14.27    1.24
   6  -3   0   12.61    1.20
   5  -3   0    1.61    0.15
   5  -3   0    1.53    0.17
   5  -3   0    1.40    0.16
  -5   3   0    1.45    0.16
  -5   3   0    1.24    0.17
  -5   3   0    1.81    0.14
   4  -3   0    0.45    0.08
   4  -3   0    0.32    0.04
   4  -3   0    0.35    0.06
   4  -3   0    0.34    0.06
   4  -3   0    0.25    0.05
  -4   3   0    0.32    0.05
  -4   3   0    0.30    0.06
  -4   3   0    0.35    0.08
  -4   3   0    0.28    0.04
   3  -3   0    2.33    0.20
   2  -3   0   12.09    0.94
  -2   3   0   11.03    0.94
   1  -3   0    7.91    0.64
   0  -3   0    0.15    0.02
   0   3   0    0.16    0.02
   0   3   0    0.16    0.04
  -1  -3   0   11.56    0.92
  -1  -3   0   11.02    0.92
  -2  -3   0    2.09    0.18
   2   3   0    1.92    0.18
  -3  -3   0    0.39    0.05
  -3  -3   0    0.36    0.05
  -3  -3   0    0.51    0.08
   3   3   0    0.57    0.07
   3   3   0    0.41    0.05
  -4  -3   0    0.46    0.06
   4   3   0    0.37    0.06
  -5  -3   0    1.23    0.13
  -5  -3   0    1.34    0.16
  -5  -3   0    1.11    0.17
   5   3   0    1.57    0.17
   5   3   0    1.10    0.16
  -6  -3   0    3.68    0.37
  -6  -3   0    3.60    0.37
  -6  -3   0    3.91    0.34
  -6  -3   0    3.44    0.37
   6   3   0    4.05    0.34
   6   3   0    4.19    0.35
   6   3   0    3.55    0.41
  -7  -3   0    1.04    0.15
   7   3   0    1.00    0.13
   7   3   0    0.69    0.13
   7   3   0    0.85    0.13
   7   3   0    0.71    0.13
  -8  -3   0    0.04    0.06
   8   3   0    0.01    0.08
   8   3   0   -0.12    0.11
   8   3   0   -0.05    0.12
   8   3   0   -0.04    0.09
   8   3   0   -0.17    0.15
  -9  -3   0    0.44    0.13
  -9  -3   0    0.71    0.14
   9   3   0    0.32    0.13
   9   3   0    0.41    0.12
   9   3   0    0.53    0.11
 -10  -3   0    2.16    0.29
 -10  -3   0    2.33    0.28
  10   3   0    2.22    0.30
  10   3   0    2.16    0.29
 -11  -3   0   -0.12    0.13
 -11  -3   0    0.32    0.16
  11   3   0    0.06    0.14
  11   3   0    0.09    0.14
 -12  -3   0    0.52    0.14
 -12  -3   0    0.40    0.19
  12   3   0    0.65    0.16
  12   3   0    0.38    0.17
 -13  -3   0    0.88    0.16
  13   3   0    0.55    0.18
  13   3   0    0.62    0.22
 -14  -3   0    0.58    0.16
  14   3   0    0.73    0.18
  14  -4   0    0.01    0.19
  14  -4   0    0.08    0.12
 -14   4   0    0.03    0.13
  13  -4   0   -0.36    0.14
  13  -4   0    0.03    0.12
 -13   4   0    0.06    0.15
  12  -4   0    0.22    0.12
  12  -4   0    0.19    0.13
 -12   4   0    0.08    0.30
 -12   4   0    0.24    0.13
  11  -4   0    5.48    0.53
 -11   4   0    5.04    0.62
 -11   4   0    4.66    0.50
 -11   4   0    6.06    0.52
  10  -4   0   44.98    4.07
  10  -4   0   45.03    4.03
 -10   4   0   44.52    3.95
   9  -4   0    1.04    0.15
   9  -4   0    1.41    0.22
   9  -4   0    0.81    0.18
   9  -4   0    0.89    0.18
  -9   4   0    1.23    0.23
  -9   4   0    1.00    0.19
  -9   4   0    1.18    0.15
   8  -4   0    0.48    0.12
   8  -4   0    0.62    0.12
   8  -4   0    0.25    0.09
   8  -4   0    0.19    0.11
  -8   4   0    0.44    0.16
  -8   4   0    0.35    0.10
  -8   4   0    0.49    0.08
  -8   4   0    0.44    0.11
   7  -4   0    0.09    0.06
   7  -4   0    0.27    0.08
   7  -4   0    0.20    0.09
   7  -4   0    0.14    0.09
  -7   4   0    0.22    0.07
  -7   4   0    0.20    0.06
  -7   4   0    0.04    0.06
  -7   4   0   -0.03    0.16
   6  -4   0    3.67    0.38
  -6   4   0    3.72    0.33
  -6   4   0    4.17    0.37
   5  -4   0    2.15    0.22
   5  -4   0    2.19    0.22
  -5   4   0    1.89    0.20
  -5   4   0    2.17    0.18
  -5   4   0    1.89    0.20
   4  -4   0    5.01    0.39
   4  -4   0    5.04    0.45
   4  -4   0    4.34    0.39
   4  -4   0    4.70    0.44
   3  -4   0   42.13    3.97
  -3   4   0   45.68    3.57
   2  -4   0    6.27    0.51
  -2   4   0    6.13    0.51
   0  -4   0    0.22    0.02
   0  -4   0    0.24    0.02
   0   4   0    0.15    0.03
   0   4   0    0.17    0.03
  -1  -4   0  450.86   36.40
   1   4   0  446.28   36.40
  -2  -4   0   23.50    2.25
   2   4   0   23.74    1.92
  -3  -4   0    5.98    0.50
  -3  -4   0    6.07    0.50
  -3  -4   0    5.74    0.59
   3   4   0    6.29    0.54
  -4  -4   0    7.19    0.60
  -4  -4   0    7.08    0.65
  -4  -4   0    7.32    0.62
   4   4   0    7.06    0.65
  -5  -4   0    1.36    0.15
  -5  -4   0    1.42    0.14
  -5  -4   0    1.27    0.15
  -5  -4   0    0.93    0.14
  -5  -4   0    0.94    0.17
   5   4   0    1.38    0.17
   5   4   0    1.07    0.13
   5   4   0    1.21    0.14
   5   4   0    1.31    0.14
   5   4   0    1.20    0.16
  -6  -4   0    3.15    0.29
  -6  -4   0    2.97    0.30
  -6  -4   0    3.08    0.28
   6   4   0    2.49    0.27
   6   4   0    3.13    0.30
   6   4   0    3.05    0.28
   6   4   0    3.01    0.30
   6   4   0    2.41    0.29
  -7  -4   0    1.64    0.21
   7   4   0    1.79    0.21
   7   4   0    1.61    0.20
  -8  -4   0   -0.02    0.11
  -8  -4   0    0.04    0.07
   8   4   0    0.06    0.08
   8   4   0   -0.03    0.12
   8   4   0    0.05    0.10
   8   4   0   -0.05    0.14
   8   4   0   -0.20    0.17
  -9  -4   0    1.78    0.28
  -9  -4   0    2.19    0.27
  -9  -4   0    2.29    0.26
   9   4   0    1.94    0.25
   9   4   0    1.87    0.24
 -10  -4   0    3.10    0.34
  10   4   0    2.89    0.34
 -11  -4   0    0.28    0.18
 -11  -4   0   -0.12    0.12
  11   4   0   -0.14    0.13
  11   4   0    0.20    0.14
 -12  -4   0    2.13    0.25
  12   4   0    1.54    0.23
  12   4   0    1.44    0.25
  13   4   0    0.24    0.16
  13   4   0    0.45    0.17
  14  -5   0    0.16    0.17
  14  -5   0    0.37    0.17
 -14   5   0    0.35    0.14
  13  -5   0    0.01    0.13
  13  -5   0   -0.08    0.14
 -13   5   0   -0.28    0.13
  12  -5   0    0.72    0.16
  12  -5   0    0.89    0.15
 -12   5   0    0.45    0.14
 -12   5   0    0.68    0.14
  11  -5   0    2.53    0.36
  11  -5   0    2.98    0.34
  11  -5   0    3.06    0.44
 -11   5   0    3.41    0.32
 -11   5   0    3.38    0.34
  10  -5   0    3.50    0.37
  10  -5   0    3.29    0.40
 -10   5   0    4.02    0.38
 -10   5   0    3.37    0.35
   9  -5   0    0.74    0.13
   9  -5   0    0.46    0.15
   9  -5   0    0.69    0.16
   9  -5   0    1.11    0.21
  -9   5   0    0.92    0.12
  -9   5   0    0.68    0.14
   8  -5   0    0.65    0.15
   8  -5   0    1.22    0.16
   8  -5   0    0.90    0.16
  -8   5   0    1.01    0.13
  -8   5   0    1.04    0.13
   7  -5   0    1.80    0.21
  -7   5   0    1.59    0.18
  -7   5   0    1.89    0.20
   6  -5   0    2.78    0.28
   6  -5   0    2.60    0.29
   6  -5   0    3.29    0.28
   6  -5   0    2.63    0.30
  -6   5   0    3.18    0.27
  -6   5   0    2.77    0.29
   5  -5   0    4.55    0.37
   5  -5   0    3.99    0.41
  -5   5   0    4.32    0.38
  -5   5   0    4.22    0.38
   4  -5   0    0.06    0.07
   4  -5   0    0.13    0.03
   4  -5   0   -0.03    0.05
   4  -5   0    0.07    0.04
   4  -5   0    0.01    0.08
   4  -5   0    0.17    0.05
  -4   5   0    0.04    0.06
  -4   5   0    0.16    0.09
  -4   5   0    0.15    0.03
  -4   5   0    0.10    0.05
   3  -5   0   21.59    2.04
  -3   5   0   21.14    1.72
  -3   5   0   20.74    1.72
   2  -5   0    6.74    0.65
  -2   5   0    6.60    0.54
   1  -5   0    0.25    0.06
   1  -5   0    0.22    0.07
   1  -5   0    0.16    0.08
  -1   5   0    0.12    0.02
  -1   5   0    0.17    0.02
   0  -5   0   16.11    1.31
   0  -5   0   15.58    1.51
   0   5   0   15.25    1.27
  -1  -5   0    4.29    0.35
  -1  -5   0    4.44    0.37
   1   5   0    3.96    0.35
   1   5   0    3.90    0.41
   1   5   0    4.35    0.35
  -2  -5   0    4.78    0.43
  -2  -5   0    5.38    0.46
  -2  -5   0    5.55    0.52
  -2  -5   0    5.41    0.44
   2   5   0    5.43    0.44
  -3  -5   0    0.73    0.10
  -3  -5   0    0.67    0.10
   3   5   0    0.72    0.10
   3   5   0    0.69    0.08
   3   5   0    0.59    0.10
   3   5   0    0.78    0.10
  -4  -5   0    1.63    0.19
  -4  -5   0    1.95    0.18
  -4  -5   0    2.19    0.22
  -4  -5   0    1.93    0.22
  -4  -5   0    2.13    0.20
   4   5   0    1.96    0.19
   4   5   0    1.72    0.17
   4   5   0    1.59    0.20
  -5  -5   0   18.26    1.60
  -5  -5   0   19.17    1.88
  -5  -5   0   18.85    1.89
  -5  -5   0   20.51    1.73
   5   5   0   20.74    1.69
  -6  -5   0    0.09    0.10
  -6  -5   0    0.13    0.11
  -6  -5   0   -0.06    0.06
  -6  -5   0    0.03    0.07
   6   5   0   -0.02    0.07
   6   5   0    0.05    0.06
   6   5   0   -0.19    0.12
   6   5   0   -0.02    0.07
  -7  -5   0    0.09    0.09
  -7  -5   0    0.14    0.13
  -7  -5   0    0.08    0.11
  -7  -5   0    0.06    0.11
   7   5   0   -0.12    0.06
   7   5   0    0.04    0.09
   7   5   0   -0.14    0.12
   7   5   0   -0.18    0.11
   7   5   0    0.03    0.12
  -8  -5   0    2.24    0.25
  -8  -5   0    1.83    0.25
  -8  -5   0    1.46    0.26
   8   5   0    1.97    0.28
   8   5   0    2.14    0.24
   8   5   0    1.72    0.29
   8   5   0    2.07    0.22
  -9  -5   0    1.08    0.18
  -9  -5   0    1.30    0.22
  -9  -5   0    1.15    0.21
   9   5   0    1.40    0.20
   9   5   0    1.12    0.18
   9   5   0    1.37    0.17
 -10  -5   0    0.76    0.16
 -10  -5   0    1.05    0.23
 -10  -5   0    0.72    0.20
  10   5   0    0.85    0.16
  10   5   0    0.61    0.19
  10   5   0    0.77    0.16
 -11  -5   0    0.18    0.12
  11   5   0   -0.13    0.17
  11   5   0   -0.01    0.13
 -12  -5   0    0.67    0.15
  12   5   0    0.88    0.19
  12   5   0    0.61    0.16
 -13  -5   0    0.01    0.11
  13   5   0    0.12    0.18
  13   5   0    0.08    0.16
  14  -6   0    0.22    0.15
 -14   6   0    0.20    0.14
  13  -6   0    0.33    0.14
  12  -6   0    1.15    0.19
  12  -6   0    1.24    0.18
 -12   6   0    0.92    0.17
 -12   6   0    1.03    0.16
  11  -6   0    3.61    0.46
  11  -6   0    3.80    0.41
 -11   6   0    4.18    0.42
 -11   6   0    4.24    0.39
  10  -6   0    2.67    0.34
   9  -6   0    5.60    0.53
   9  -6   0    5.72    0.55
   9  -6   0    5.24    0.56
   8  -6   0    0.11    0.11
   8  -6   0    0.02    0.08
   8  -6   0    0.03    0.10
   8  -6   0   -0.09    0.13
  -8   6   0    0.03    0.11
  -8   6   0    0.06    0.09
  -8   6   0    0.05    0.07
   7  -6   0    0.16    0.08
   7  -6   0    0.07    0.07
   7  -6   0    0.14    0.09
   7  -6   0    0.11    0.10
   7  -6   0    0.13    0.09
  -7   6   0    0.10    0.08
  -7   6   0    0.31    0.07
  -7   6   0    0.05    0.06
   6  -6   0    1.23    0.16
   6  -6   0    1.08    0.16
   6  -6   0    0.82    0.13
  -6   6   0    1.01    0.11
  -6   6   0    1.28    0.13
  -6   6   0    1.13    0.15
   5  -6   0   21.80    1.95
  -5   6   0   20.50    1.91
  -5   6   0   22.64    1.77
   4  -6   0    4.21    0.34
   4  -6   0    3.80    0.40
   4  -6   0    4.33    0.39
   4  -6   0    4.26    0.42
  -4   6   0    3.78    0.35
  -4   6   0    4.47    0.39
   3  -6   0    2.87    0.28
   3  -6   0    2.97    0.30
   3  -6   0    3.18    0.31
  -3   6   0    2.88    0.25
   2  -6   0    8.49    0.71
   2  -6   0    8.62    0.79
   2  -6   0    7.73    0.76
   1  -6   0   10.28    0.96
   1  -6   0   10.55    0.89
   1  -6   0   10.06    1.02
  -1   6   0   10.83    0.85
   0  -6   0    4.61    0.40
  -1  -6   0    0.13    0.05
   1   6   0    0.16    0.03
   1   6   0    0.13    0.03
  -2  -6   0   26.09    2.00
  -2  -6   0   25.01    2.20
  -2  -6   0   23.16    2.37
  -2  -6   0   24.22    2.36
   2   6   0   23.49    2.00
   2   6   0   25.29    2.16
  -3  -6   0    0.08    0.08
  -3  -6   0    0.23    0.06
  -3  -6   0    0.27    0.06
   3   6   0    0.22    0.06
   3   6   0    0.22    0.07
   3   6   0    0.19    0.04
   3   6   0    0.18    0.07
  -4  -6   0   23.91    2.34
  -4  -6   0   23.48    1.99
   4   6   0   25.34    1.99
   4   6   0   24.78    2.00
  -5  -6   0   -0.03    0.08
  -5  -6   0    0.10    0.06
  -5  -6   0    0.04    0.09
   5   6   0    0.19    0.14
   5   6   0   -0.02    0.06
   5   6   0    0.01    0.07
   5   6   0    0.01    0.05
  -6  -6   0    0.04    0.07
  -6  -6   0    0.06    0.09
  -6  -6   0    0.11    0.10
   6   6   0    0.06    0.07
   6   6   0    0.10    0.08
   6   6   0   -0.08    0.09
  -7  -6   0    2.05    0.27
  -7  -6   0    2.17    0.27
  -7  -6   0    1.91    0.23
   7   6   0    2.17    0.23
   7   6   0    2.33    0.29
   7   6   0    1.64    0.24
   7   6   0    2.49    0.24
  -8  -6   0    0.21    0.15
  -8  -6   0    0.45    0.11
   8   6   0    0.48    0.18
   8   6   0    0.29    0.09
   8   6   0    0.38    0.11
  -9  -6   0    0.09    0.16
   9   6   0    0.19    0.16
 -10  -6   0    0.44    0.20
 -10  -6   0    0.31    0.11
  10   6   0    0.19    0.13
  10   6   0    0.12    0.12
  10   6   0    0.19    0.18
 -11  -6   0    0.99    0.17
  11   6   0    0.82    0.21
  11   6   0    1.09    0.17
 -12  -6   0    0.25    0.12
  12   6   0    0.20    0.15
  12   6   0    0.03    0.19
 -13  -6   0    0.25    0.12
  13   6   0    0.45    0.18
  12  -7   0    1.28    0.19
  12  -7   0    1.05    0.18
 -12   7   0    1.25    0.19
 -12   7   0    1.21    0.17
  11  -7   0    0.80    0.14
  11  -7   0    0.86    0.20
  11  -7   0    0.63    0.19
  11  -7   0    0.75    0.16
 -11   7   0    0.51    0.15
 -11   7   0    0.89    0.13
  10  -7   0    1.49    0.23
  10  -7   0    1.83    0.23
  10  -7   0    2.03    0.28
  10  -7   0    1.66    0.24
 -10   7   0    1.42    0.20
 -10   7   0    1.71    0.23
   9  -7   0    1.01    0.14
   9  -7   0    0.80    0.16
   9  -7   0    0.56    0.16
  -9   7   0    0.82    0.15
  -9   7   0    0.62    0.12
   8  -7   0    0.03    0.09
   8  -7   0   -0.01    0.11
   8  -7   0   -0.19    0.12
   8  -7   0   -0.01    0.09
   8  -7   0    0.11    0.10
  -8   7   0    0.08    0.10
  -8   7   0    0.03    0.07
   7  -7   0    0.32    0.10
   7  -7   0    0.20    0.10
   7  -7   0    0.12    0.11
   7  -7   0    0.25    0.08
   7  -7   0    0.26    0.08
  -7   7   0    0.34    0.10
  -7   7   0    0.24    0.08
  -7   7   0    0.21    0.07
   6  -7   0    0.06    0.06
   6  -7   0    0.06    0.06
   6  -7   0   -0.05    0.08
   6  -7   0    0.10    0.06
   6  -7   0    0.01    0.08
  -6   7   0    0.01    0.06
  -6   7   0    0.08    0.05
  -6   7   0    0.13    0.09
   5  -7   0    1.25    0.16
   5  -7   0    1.63    0.20
   5  -7   0    1.24    0.17
   5  -7   0    1.66    0.17
   5  -7   0    1.20    0.18
  -5   7   0    1.65    0.14
  -5   7   0    1.53    0.17
  -5   7   0    1.39    0.20
  -5   7   0    1.44    0.17
   4  -7   0    6.74    0.71
   4  -7   0    7.53    0.67
   4  -7   0    7.60    0.63
  -4   7   0    6.74    0.59
   3  -7   0    2.82    0.31
   3  -7   0    3.29    0.30
   3  -7   0    3.18    0.37
   3  -7   0    3.11    0.29
  -3   7   0    3.52    0.33
   2  -7   0    0.28    0.11
   2  -7   0    0.37    0.08
   2  -7   0    0.21    0.09
   2  -7   0    0.46    0.09
  -2   7   0    0.24    0.04
   1  -7   0   12.82    1.16
  -1   7   0   12.59    1.03
   0  -7   0    0.50    0.10
   0  -7   0    0.46    0.10
   0   7   0    0.56    0.07
   0   7   0    0.49    0.06
  -1  -7   0    0.57    0.08
   1   7   0    0.70    0.07
   1   7   0    0.44    0.07
   1   7   0    0.60    0.11
  -2  -7   0    0.67    0.10
   2   7   0    0.68    0.08
   2   7   0    0.64    0.11
   2   7   0    0.82    0.10
  -3  -7   0    5.31    0.55
  -3  -7   0    5.59    0.49
   3   7   0    5.68    0.49
  -4  -7   0    0.10    0.06
  -4  -7   0    0.02    0.07
  -4  -7   0    0.06    0.06
   4   7   0    0.16    0.05
   4   7   0    0.09    0.08
   4   7   0    0.04    0.06
  -5  -7   0    0.12    0.06
  -5  -7   0    0.17    0.08
  -5  -7   0    0.04    0.10
  -5  -7   0    0.19    0.14
   5   7   0    0.07    0.06
   5   7   0    0.06    0.07
   5   7   0    0.18    0.08
  -6  -7   0    0.09    0.07
  -6  -7   0    0.22    0.11
  -6  -7   0    0.29    0.10
   6   7   0    0.23    0.08
   6   7   0   -0.07    0.18
   6   7   0    0.36    0.09
   6   7   0    0.24    0.11
  -7  -7   0   -0.07    0.13
  -7  -7   0   -0.19    0.08
  -7  -7   0   -0.12    0.12
   7   7   0    0.01    0.20
   7   7   0    0.12    0.08
   7   7   0   -0.02    0.09
  -8  -7   0    0.78    0.17
  -8  -7   0    0.79    0.20
  -8  -7   0    0.62    0.13
   8   7   0    0.72    0.13
   8   7   0    0.93    0.16
   8   7   0    1.31    0.24
  -9  -7   0    0.56    0.18
  -9  -7   0    0.46    0.11
   9   7   0    0.25    0.23
   9   7   0    0.32    0.14
   9   7   0    0.16    0.11
 -10  -7   0    0.03    0.20
 -10  -7   0    0.25    0.11
  10   7   0    0.14    0.13
  10   7   0    0.34    0.21
  10   7   0    0.52    0.14
 -11  -7   0    0.32    0.12
  11   7   0    0.18    0.19
  11   7   0    0.90    0.23
  11   7   0    0.50    0.14
 -12  -7   0    0.07    0.11
  12   7   0   -0.10    0.14
  12   7   0    0.31    0.27
  13  -8   0    0.17    0.12
  12  -8   0    0.20    0.13
 -12   8   0    0.45    0.11
 -12   8   0    0.50    0.14
  11  -8   0    1.86    0.27
  11  -8   0    1.55    0.26
  11  -8   0    1.80    0.27
 -11   8   0    2.34    0.23
 -11   8   0    2.27    0.27
  10  -8   0   -0.02    0.13
  10  -8   0    0.06    0.15
  10  -8   0    0.08    0.15
  10  -8   0    0.16    0.12
 -10   8   0    0.19    0.13
 -10   8   0    0.14    0.10
   9  -8   0   14.58    1.37
   9  -8   0   14.37    1.29
   9  -8   0   13.43    1.26
  -9   8   0   13.14    1.24
   8  -8   0    1.02    0.21
   8  -8   0    0.45    0.13
   8  -8   0    0.54    0.13
   8  -8   0    0.82    0.12
  -8   8   0    0.54    0.11
  -8   8   0    0.50    0.13
   7  -8   0    0.24    0.11
   7  -8   0    0.12    0.08
   7  -8   0    0.02    0.08
   7  -8   0    0.09    0.09
   7  -8   0   -0.01    0.07
   7  -8   0    0.06    0.16
  -7   8   0    0.07    0.10
  -7   8   0    0.01    0.07
  -7   8   0   -0.04    0.11
   6  -8   0    0.16    0.15
   6  -8   0    0.17    0.09
   6  -8   0    0.29    0.09
   6  -8   0    0.23    0.08
   6  -8   0    0.22    0.08
   6  -8   0    0.27    0.10
  -6   8   0    0.24    0.07
  -6   8   0    0.15    0.07
  -6   8   0    0.35    0.11
   5  -8   0    3.62    0.33
   5  -8   0    3.57    0.35
   5  -8   0    3.59    0.36
   5  -8   0    3.54    0.34
  -5   8   0    3.00    0.32
  -5   8   0    3.16    0.29
   4  -8   0    0.07    0.08
   4  -8   0    0.03    0.07
   4  -8   0   -0.01    0.10
   4  -8   0    0.22    0.09
   4  -8   0   -0.02    0.08
   4  -8   0    0.02    0.06
  -4   8   0    0.00    0.08
  -4   8   0    0.10    0.07
  -4   8   0    0.01    0.11
  -4   8   0    0.12    0.04
  -3   8   0   20.37    1.65
  -3   8   0   20.18    1.65
   2  -8   0    6.00    0.57
   2  -8   0    5.93    0.56
   2  -8   0    5.92    0.53
   2  -8   0    5.41    0.57
  -2   8   0    5.36    0.47
   1  -8   0   12.40    1.06
   1  -8   0   10.70    1.13
   1  -8   0   10.95    0.98
  -1   8   0   11.60    0.94
  -1   8   0   11.71    0.94
   0  -8   0    0.27    0.14
   0  -8   0    0.14    0.08
   0  -8   0    0.41    0.11
   0  -8   0    0.46    0.09
   0  -8   0    0.30    0.10
   0   8   0    0.23    0.05
   0   8   0    0.21    0.04
   0   8   0    0.18    0.11
  -1  -8   0   10.38    1.05
  -1  -8   0   11.11    1.11
  -1  -8   0   11.88    0.97
  -1  -8   0   11.57    1.02
   1   8   0   11.20    0.99
   1   8   0   11.68    0.93
  -2  -8   0   17.04    1.73
  -2  -8   0   18.43    1.52
  -2  -8   0   18.93    1.62
   2   8   0   17.46    1.59
  -3  -8   0   15.31    1.28
   3   8   0   15.06    1.31
   3   8   0   14.89    1.24
  -4  -8   0    0.61    0.11
  -4  -8   0    0.63    0.13
   4   8   0    0.46    0.09
   4   8   0    0.68    0.10
   4   8   0    0.75    0.11
  -5  -8   0    1.15    0.18
  -5  -8   0    0.98    0.15
  -5  -8   0    1.05    0.14
   5   8   0    1.04    0.14
   5   8   0    0.89    0.13
   5   8   0    1.29    0.17
  -6  -8   0    2.43    0.26
  -6  -8   0    1.73    0.22
  -6  -8   0    2.25    0.24
   6   8   0    1.84    0.23
   6   8   0    1.88    0.21
  -7  -8   0    2.10    0.28
  -7  -8   0    2.72    0.30
  -7  -8   0    1.81    0.25
   7   8   0    2.73    0.27
   7   8   0    2.21    0.24
  -8  -8   0    0.08    0.11
   8   8   0   -0.03    0.09
   8   8   0   -0.25    0.11
  -9  -8   0    0.97    0.16
  -9  -8   0    1.15    0.22
   9   8   0    0.87    0.17
   9   8   0    0.85    0.15
 -10  -8   0    0.14    0.11
 -10  -8   0    0.43    0.23
  10   8   0    0.30    0.13
  10   8   0    0.31    0.14
 -11  -8   0   -0.04    0.11
  11   8   0    0.16    0.13
  11   8   0   -0.15    0.18
 -12  -8   0    0.28    0.13
  12   8   0    0.06    0.14
  13  -9   0   -0.16    0.13
  12  -9   0    0.70    0.16
  12  -9   0    1.34    0.25
 -12   9   0    0.82    0.16
 -12   9   0    1.03    0.15
  11  -9   0   -0.11    0.11
  11  -9   0    0.05    0.16
  11  -9   0    0.34    0.18
 -11   9   0    0.15    0.10
 -11   9   0    0.11    0.13
  10  -9   0    0.41    0.14
  10  -9   0    0.27    0.15
  10  -9   0    0.65    0.16
 -10   9   0    0.20    0.10
 -10   9   0    0.09    0.14
   9  -9   0    0.55    0.15
   9  -9   0    0.68    0.16
   9  -9   0    0.44    0.14
  -9   9   0    0.51    0.12
  -9   9   0    0.44    0.15
   8  -9   0    0.00    0.09
   8  -9   0    0.00    0.12
   8  -9   0    0.11    0.13
   8  -9   0    0.05    0.12
  -8   9   0   -0.06    0.12
  -8   9   0    0.07    0.09
   7  -9   0    0.16    0.10
   7  -9   0   -0.02    0.11
   7  -9   0    0.03    0.08
   7  -9   0    0.03    0.10
  -7   9   0    0.04    0.12
  -7   9   0    0.06    0.08
   6  -9   0    0.25    0.11
   6  -9   0    0.44    0.12
   6  -9   0    0.23    0.11
   6  -9   0    0.37    0.11
   6  -9   0    0.21    0.12
  -6   9   0    0.46    0.09
  -6   9   0    0.47    0.13
  -6   9   0    0.27    0.08
   5  -9   0    2.59    0.29
   5  -9   0    2.52    0.31
   5  -9   0    2.99    0.28
  -5   9   0    2.49    0.24
  -5   9   0    2.72    0.27
  -5   9   0    2.46    0.30
   4  -9   0    7.65    0.74
   4  -9   0    7.73    0.74
   4  -9   0    8.31    0.68
   4  -9   0    8.30    0.73
   4  -9   0    7.61    0.77
   4  -9   0    6.91    0.72
  -4   9   0    8.05    0.68
  -4   9   0    7.15    0.63
   3  -9   0    0.43    0.09
   3  -9   0    0.63    0.12
   3  -9   0    0.36    0.09
   3  -9   0    0.63    0.11
   3  -9   0    0.51    0.11
   3  -9   0    0.46    0.12
  -3   9   0    0.39    0.05
  -3   9   0    0.27    0.07
   2  -9   0    2.10    0.24
   2  -9   0    2.18    0.24
   2  -9   0    1.92    0.22
   2  -9   0    2.45    0.25
   2  -9   0    2.25    0.26
   2  -9   0    2.67    0.27
  -2   9   0    2.10    0.19
  -2   9   0    2.05    0.20
   1  -9   0    0.65    0.10
   1  -9   0    0.62    0.10
   1  -9   0    0.25    0.15
   1  -9   0    0.55    0.12
   1  -9   0    0.44    0.10
   1  -9   0    0.62    0.11
  -1   9   0    0.57    0.07
   0  -9   0    0.14    0.09
   0  -9   0   -0.06    0.06
   0  -9   0    0.21    0.16
   0  -9   0    0.02    0.06
   0  -9   0    0.00    0.09
   0  -9   0   -0.02    0.05
   0  -9   0    0.04    0.07
   0   9   0    0.04    0.05
   0   9   0   -0.22    0.11
   0   9   0    0.02    0.03
  -1  -9   0    1.86    0.22
  -1  -9   0    1.99    0.21
  -1  -9   0    1.48    0.17
  -1  -9   0    1.49    0.19
   1   9   0    1.46    0.19
   1   9   0    1.69    0.22
   1   9   0    1.63    0.15
   1   9   0    1.74    0.18
  -2  -9   0    2.73    0.28
  -2  -9   0    3.45    0.35
  -2  -9   0    2.67    0.32
   2   9   0    3.15    0.29
   2   9   0    3.06    0.26
  -3  -9   0    0.74    0.10
  -3  -9   0    0.74    0.11
  -3  -9   0    0.61    0.11
  -3  -9   0    0.58    0.13
   3   9   0    0.88    0.11
   3   9   0    0.54    0.10
  -5  -9   0    0.74    0.13
  -5  -9   0    0.52    0.14
  -5  -9   0    0.71    0.11
   5   9   0    0.70    0.11
   5   9   0    0.71    0.13
  -6  -9   0    5.69    0.54
  -6  -9   0    5.01    0.52
   6   9   0    5.94    0.54
   6   9   0    5.82    0.52
  -7  -9   0    0.21    0.13
  -7  -9   0    0.43    0.15
  -8  -9   0    0.00    0.16
  -8  -9   0    0.05    0.18
  -8  -9   0    0.05    0.10
   8   9   0    0.04    0.10
   8   9   0   -0.21    0.11
  -9  -9   0   -0.03    0.11
  -9  -9   0    0.23    0.19
   9   9   0   -0.05    0.11
   9   9   0    0.11    0.13
 -10  -9   0    1.00    0.17
 -10  -9   0    1.31    0.31
  10   9   0    1.50    0.19
  10   9   0    1.35    0.19
 -11  -9   0    0.14    0.12
  11   9   0    0.29    0.21
  12 -10   0    1.05    0.24
  11 -10   0    0.03    0.11
  11 -10   0    0.19    0.16
  11 -10   0   -0.05    0.18
 -11  10   0   -0.03    0.14
 -11  10   0    0.18    0.10
  10 -10   0    0.33    0.16
  10 -10   0    0.12    0.14
  10 -10   0    0.52    0.16
 -10  10   0    0.55    0.12
 -10  10   0    0.51    0.16
   9 -10   0   10.14    0.97
   9 -10   0    9.91    0.94
  -9  10   0    9.64    0.91
   8 -10   0    2.86    0.34
   8 -10   0    3.11    0.34
   8 -10   0    3.23    0.36
  -8  10   0    2.56    0.31
   7 -10   0    0.48    0.12
   7 -10   0    0.39    0.13
   7 -10   0    0.37    0.13
   7 -10   0    0.19    0.10
  -7  10   0    0.17    0.15
  -7  10   0    0.20    0.09
   6 -10   0    0.20    0.11
   6 -10   0    0.29    0.12
   6 -10   0    0.05    0.10
   6 -10   0    0.31    0.12
   6 -10   0    0.14    0.11
  -6  10   0    0.05    0.08
  -6  10   0   -0.02    0.14
   5 -10   0    5.45    0.58
   5 -10   0    5.77    0.57
  -5  10   0    6.09    0.57
  -5  10   0    6.03    0.50
   4 -10   0    0.45    0.12
   4 -10   0    0.49    0.11
   4 -10   0    0.35    0.11
   4 -10   0    0.37    0.11
   4 -10   0    0.40    0.13
   4 -10   0    0.23    0.11
  -4  10   0    0.39    0.07
   3 -10   0    0.31    0.11
   3 -10   0    0.25    0.10
   3 -10   0    0.29    0.10
   3 -10   0    0.19    0.12
   3 -10   0    0.20    0.10
   3 -10   0    0.39    0.11
  -3  10   0    0.35    0.06
   2 -10   0    0.17    0.09
   2 -10   0    0.30    0.09
   2 -10   0    0.18    0.11
   2 -10   0    0.40    0.09
   2 -10   0    0.18    0.14
   2 -10   0    0.37    0.10
  -2  10   0    0.38    0.06
  -2  10   0    0.46    0.08
   1 -10   0   -0.10    0.12
   1 -10   0    0.05    0.09
   1 -10   0    0.03    0.08
   1 -10   0   -0.02    0.09
   1 -10   0   -0.06    0.09
   1 -10   0   -0.01    0.06
  -1  10   0   -0.03    0.04
   0 -10   0    1.87    0.22
   0 -10   0    2.33    0.27
   0 -10   0    2.07    0.23
   0 -10   0    1.86    0.28
   0 -10   0    2.27    0.26
   0  10   0    1.78    0.28
   0  10   0    2.46    0.23
  -1 -10   0   12.50    1.29
  -1 -10   0   13.41    1.22
  -1 -10   0   13.99    1.28
  -1 -10   0   12.30    1.25
   1  10   0   13.35    1.08
  -2 -10   0   19.33    1.76
  -2 -10   0   18.28    1.67
  -2 -10   0   18.95    1.53
   2  10   0   16.92    1.57
   2  10   0   17.80    1.60
   2  10   0   17.47    1.48
  -5 -10   0    0.13    0.13
  -5 -10   0   -0.09    0.12
  -5 -10   0    0.20    0.10
  -5 -10   0    0.11    0.11
  -5 -10   0   -0.03    0.08
   5  10   0    0.17    0.11
   5  10   0    0.15    0.08
  -6 -10   0   -0.02    0.09
  -6 -10   0    0.07    0.12
  -6 -10   0    0.05    0.13
   6  10   0    0.16    0.11
  -7 -10   0    0.16    0.15
  -7 -10   0    0.02    0.14
  -7 -10   0    0.21    0.10
   7  10   0    0.06    0.10
   7  10   0   -0.10    0.12
  -8 -10   0    0.12    0.18
  -8 -10   0    0.20    0.11
  -8 -10   0   -0.04    0.17
   8  10   0    0.10    0.10
   8  10   0   -0.04    0.12
  -9 -10   0    0.20    0.14
  -9 -10   0    0.16    0.11
  -9 -10   0   -0.04    0.20
   9  10   0    0.07    0.11
   9  10   0    0.25    0.13
 -10 -10   0   -0.04    0.13
 -10 -10   0   -0.05    0.14
  10  10   0    0.19    0.13
 -11 -10   0   -0.20    0.15
  11  10   0    0.09    0.14
  12 -11   0   -0.11    0.14
  12 -11   0    0.82    0.23
 -12  11   0   -0.03    0.10
  11 -11   0    0.42    0.17
  11 -11   0    0.23    0.13
 -11  11   0    0.30    0.17
  10 -11   0    0.55    0.15
  10 -11   0    0.67    0.16
  10 -11   0    0.94    0.18
 -10  11   0    0.37    0.12
 -10  11   0    0.67    0.18
   9 -11   0    0.72    0.18
   9 -11   0    1.03    0.19
   9 -11   0    1.06    0.18
  -9  11   0    0.89    0.21
   8 -11   0    0.10    0.14
   8 -11   0    0.09    0.14
   8 -11   0    0.42    0.14
   8 -11   0    0.05    0.14
  -8  11   0    0.34    0.11
  -8  11   0    0.08    0.17
   7 -11   0    0.57    0.15
   7 -11   0    0.38    0.14
   7 -11   0    0.65    0.13
  -7  11   0    0.24    0.18
   6 -11   0    3.33    0.33
   6 -11   0    2.78    0.35
   6 -11   0    2.84    0.35
   6 -11   0    3.04    0.35
   6 -11   0    2.72    0.32
  -6  11   0    3.03    0.37
  -6  11   0    3.19    0.30
   5 -11   0    4.05    0.46
   5 -11   0    4.48    0.47
   5 -11   0    4.29    0.46
   5 -11   0    4.96    0.50
  -5  11   0    4.89    0.43
   4 -11   0    0.13    0.10
   4 -11   0    0.31    0.12
   4 -11   0    0.15    0.08
   4 -11   0    0.19    0.13
   4 -11   0   -0.15    0.10
   4 -11   0    0.00    0.12
  -4  11   0   -0.03    0.08
  -4  11   0   -0.21    0.10
   3 -11   0    3.25    0.38
   3 -11   0    2.95    0.35
   3 -11   0    3.20    0.33
  -3  11   0    3.57    0.29
  -3  11   0    3.37    0.33
   2 -11   0    1.94    0.21
   2 -11   0    1.73    0.24
   2 -11   0    1.55    0.21
   2 -11   0    1.48    0.20
   2 -11   0    1.47    0.23
  -2  11   0    1.82    0.17
   1 -11   0    1.89    0.23
   1 -11   0    2.22    0.23
   1 -11   0    1.90    0.21
   1 -11   0    1.75    0.24
   1 -11   0    1.78    0.24
  -1  11   0    1.69    0.18
  -1  11   0    1.72    0.23
   0 -11   0    0.74    0.15
   0 -11   0    0.96    0.15
   0 -11   0    1.03    0.17
   0 -11   0    0.84    0.18
   0 -11   0    0.96    0.14
   0  11   0    0.89    0.11
   0  11   0    0.88    0.14
  -1 -11   0    3.86    0.40
  -1 -11   0    3.63    0.35
  -1 -11   0    3.32    0.40
  -1 -11   0    3.97    0.38
   1  11   0    3.49    0.39
   1  11   0    3.87    0.35
   1  11   0    3.58    0.33
  -5 -11   0    4.52    0.46
  -5 -11   0    5.13    0.52
  -5 -11   0    5.11    0.53
   5  11   0    4.63    0.48
  -6 -11   0    0.86    0.15
  -6 -11   0    1.00    0.19
  -6 -11   0    1.12    0.20
  -6 -11   0    1.10    0.18
   6  11   0    0.98    0.15
   6  11   0    1.21    0.18
  -7 -11   0    0.04    0.14
  -7 -11   0   -0.05    0.16
  -7 -11   0    0.18    0.12
  -7 -11   0    0.15    0.14
   7  11   0    0.23    0.13
   7  11   0    0.21    0.10
  -8 -11   0    0.05    0.13
  -8 -11   0    0.07    0.20
  -8 -11   0   -0.15    0.12
  -8 -11   0   -0.33    0.17
   8  11   0    0.07    0.11
   8  11   0    0.13    0.13
  -9 -11   0    0.20    0.15
   9  11   0    0.52    0.13
   9  11   0    0.54    0.15
 -10 -11   0    0.13    0.16
  10  11   0    0.18    0.14
  10  11   0    0.01    0.14
  11 -12   0    0.06    0.19
  11 -12   0   -0.16    0.14
  11 -12   0    0.24    0.17
 -11  12   0    0.10    0.10
  10 -12   0    2.70    0.35
  10 -12   0    3.42    0.37
 -10  12   0    2.73    0.41
 -10  12   0    3.06    0.31
   9 -12   0    1.99    0.26
   9 -12   0    1.28    0.23
   9 -12   0    1.77    0.25
  -9  12   0    2.17    0.22
  -9  12   0    1.57    0.27
   8 -12   0    2.38    0.30
   8 -12   0    2.35    0.30
   8 -12   0    2.33    0.30
   8 -12   0    2.18    0.30
  -8  12   0    2.16    0.26
   7 -12   0    0.94    0.18
   7 -12   0    0.91    0.18
   7 -12   0    0.93    0.17
  -7  12   0    0.88    0.14
   6 -12   0    0.26    0.14
   6 -12   0    0.27    0.13
   6 -12   0    0.25    0.14
   6 -12   0    0.42    0.15
   5 -12   0   -0.03    0.11
   5 -12   0    0.20    0.13
   5 -12   0    0.08    0.12
   5 -12   0    0.21    0.14
   5 -12   0    0.03    0.11
  -5  12   0    0.16    0.12
   4 -12   0    0.03    0.16
   4 -12   0    0.17    0.14
   4 -12   0    0.11    0.13
   4 -12   0    0.03    0.11
   4 -12   0   -0.05    0.12
   4 -12   0   -0.04    0.11
  -4  12   0   -0.05    0.11
   3 -12   0    2.76    0.31
   3 -12   0    2.60    0.30
   3 -12   0    2.67    0.31
   3 -12   0    2.06    0.29
  -3  12   0    2.41    0.28
   2 -12   0    0.25    0.11
   2 -12   0    0.20    0.12
   2 -12   0    0.11    0.12
   2 -12   0    0.43    0.12
  -2  12   0   -0.05    0.12
   1 -12   0    1.38    0.21
   1 -12   0    1.72    0.23
   1 -12   0    1.61    0.23
   1 -12   0    1.95    0.25
  -1  12   0    1.48    0.21
  -4 -12   0    2.67    0.30
  -4 -12   0    2.74    0.34
  -4 -12   0    3.06    0.33
   4  12   0    2.44    0.30
  -5 -12   0   -0.23    0.12
  -5 -12   0   -0.30    0.19
  -5 -12   0   -0.02    0.11
  -5 -12   0   -0.15    0.14
   5  12   0    0.07    0.10
   5  12   0    0.17    0.13
  -6 -12   0    0.24    0.16
  -6 -12   0    0.32    0.13
  -6 -12   0    0.03    0.14
   6  12   0    0.47    0.15
   6  12   0    0.35    0.11
  -7 -12   0   -0.02    0.15
  -7 -12   0    0.09    0.14
  -7 -12   0   -0.45    0.16
   7  12   0    0.11    0.11
   7  12   0   -0.10    0.14
  -8 -12   0   -0.14    0.14
  -8 -12   0   -0.04    0.20
   8  12   0    0.09    0.12
   8  12   0    0.00    0.13
  -9 -12   0    0.05    0.15
  -9 -12   0    0.27    0.29
   9  12   0    0.30    0.15
   9  12   0    0.40    0.13
  11 -13   0    0.97    0.20
  11 -13   0    1.03    0.20
  11 -13   0    0.79    0.24
 -11  13   0    0.87    0.14
  10 -13   0    0.32    0.16
  10 -13   0    0.05    0.15
 -10  13   0    0.03    0.13
   9 -13   0    0.51    0.15
   9 -13   0    0.37    0.16
   9 -13   0    0.19    0.13
  -9  13   0    0.41    0.12
   8 -13   0    2.67    0.30
   8 -13   0    2.36    0.31
   8 -13   0    2.35    0.31
   8 -13   0    2.40    0.32
  -8  13   0    2.12    0.26
   7 -13   0    0.17    0.14
   7 -13   0    0.38    0.14
   7 -13   0    0.22    0.13
   7 -13   0    0.25    0.16
  -7  13   0    0.11    0.11
   6 -13   0    0.68    0.18
   6 -13   0    0.63    0.17
   6 -13   0    0.37    0.16
  -6  13   0    0.85    0.14
   5 -13   0    1.56    0.23
   5 -13   0    0.89    0.18
   5 -13   0    1.10    0.19
   5 -13   0    1.69    0.23
  -5  13   0    1.36    0.18
   4 -13   0    0.83    0.17
   4 -13   0    1.13    0.19
   4 -13   0    0.89    0.18
   4 -13   0    0.95    0.18
   3 -13   0    0.74    0.16
   3 -13   0    0.58    0.15
  -3  13   0    0.69    0.15
   2 -13   0    0.08    0.14
   2 -13   0    0.05    0.11
   2 -13   0    0.03    0.13
   2 -13   0   -0.07    0.10
   2 -13   0   -0.19    0.12
  -2  13   0   -0.18    0.12
   1 -13   0   -0.08    0.12
   1 -13   0   -0.02    0.12
   1 -13   0   -0.18    0.17
   1 -13   0    0.15    0.12
   1 -13   0    0.10    0.11
  -1  13   0    0.07    0.12
   0 -13   0    1.28    0.21
   0 -13   0    1.24    0.18
   0 -13   0    1.60    0.21
   0 -13   0    1.58    0.22
   0  13   0    1.51    0.21
  -1 -13   0    0.59    0.15
   1  13   0    0.55    0.12
  -2 -13   0    0.30    0.13
  -2 -13   0    0.62    0.16
  -2 -13   0    0.61    0.16
  -2 -13   0    0.59    0.16
  -3 -13   0    0.82    0.17
  -3 -13   0    0.36    0.14
  -3 -13   0    0.33    0.13
  -3 -13   0    0.33    0.15
   3  13   0    0.68    0.18
   3  13   0    0.57    0.12
  -4 -13   0    0.21    0.14
  -4 -13   0   -0.14    0.12
  -4 -13   0    0.26    0.19
  -4 -13   0    0.17    0.14
   4  13   0    0.37    0.11
   4  13   0    0.15    0.16
  -5 -13   0   -0.02    0.13
  -5 -13   0   -0.13    0.15
  -5 -13   0   -0.04    0.13
   5  13   0    0.15    0.11
   5  13   0    0.09    0.14
  -6 -13   0    0.35    0.15
  -6 -13   0    0.31    0.15
  -6 -13   0    0.50    0.18
   6  13   0    0.34    0.12
   6  13   0    0.52    0.16
  -7 -13   0    0.15    0.15
  -7 -13   0   -0.16    0.16
  -7 -13   0    0.05    0.18
   7  13   0    0.07    0.15
   7  13   0    0.09    0.11
  -8 -13   0   -0.08    0.23
   8  13   0   -0.01    0.16
  -9 -13   0    0.07    0.17
   9  13   0    0.15    0.17
   9  13   0    0.48    0.14
  10 -14   0    0.81    0.22
  10 -14   0    0.28    0.19
  10 -14   0    0.18    0.18
 -10  14   0    0.43    0.12
   9 -14   0    0.19    0.14
  -9  14   0    0.12    0.12
   8 -14   0    6.36    0.65
   8 -14   0    6.55    0.66
   8 -14   0    7.08    0.66
  -8  14   0    6.23    0.60
   7 -14   0    1.18    0.22
   7 -14   0    0.35    0.16
   7 -14   0    0.34    0.15
   7 -14   0    0.61    0.16
  -7  14   0    0.64    0.14
   6 -14   0    0.22    0.13
   6 -14   0    0.04    0.12
   6 -14   0    0.22    0.14
  -6  14   0    0.28    0.12
   5 -14   0    2.03    0.28
   5 -14   0    1.71    0.26
   5 -14   0    2.22    0.27
   5 -14   0    1.34    0.25
  -5  14   0    1.98    0.25
   4 -14   0    0.77    0.17
   4 -14   0    0.98    0.18
   4 -14   0    0.95    0.20
   4 -14   0    1.03    0.19
  -4  14   0    0.97    0.17
   3 -14   0    0.90    0.19
   3 -14   0    0.76    0.19
   3 -14   0    0.87    0.19
   3 -14   0    1.08    0.18
   3 -14   0    0.88    0.17
  -3  14   0    1.37    0.17
   2 -14   0    1.15    0.20
   2 -14   0    1.07    0.20
   2 -14   0    1.43    0.24
   2 -14   0    1.62    0.24
   1 -14   0    0.32    0.14
   1 -14   0    0.28    0.13
   1 -14   0    0.39    0.13
   1 -14   0    0.16    0.12
   1 -14   0    0.24    0.21
  -1  14   0    0.35    0.14
   0 -14   0    2.01    0.32
   0 -14   0    2.37    0.28
   0 -14   0    2.97    0.33
   0 -14   0    3.01    0.32
   0  14   0    2.56    0.29
  -1 -14   0    0.80    0.18
  -1 -14   0    0.82    0.16
  -1 -14   0    1.30    0.20
   1  14   0    0.99    0.16
  -2 -14   0   -0.03    0.11
  -2 -14   0   -0.01    0.15
  -2 -14   0    0.15    0.13
  -2 -14   0    0.05    0.12
   2  14   0    0.09    0.11
  -3 -14   0    1.62    0.26
  -3 -14   0    1.75    0.27
  -3 -14   0    1.62    0.25
  -3 -14   0    1.75    0.23
   3  14   0    1.53    0.22
  -4 -14   0    0.77    0.19
  -4 -14   0    0.93    0.17
  -4 -14   0    0.85    0.19
   4  14   0    0.78    0.23
   4  14   0    0.95    0.14
  -5 -14   0    0.51    0.15
  -5 -14   0    0.85    0.19
   5  14   0    0.49    0.21
   5  14   0    0.59    0.13
  -6 -14   0    1.10    0.18
  -6 -14   0    0.94    0.18
  -6 -14   0    0.60    0.20
   6  14   0    0.56    0.22
   6  14   0    0.93    0.15
  -7 -14   0   -0.13    0.15
  -7 -14   0    0.07    0.19
   7  14   0    0.05    0.12
   7  14   0    0.03    0.19
  -8 -14   0   -0.38    0.16
   9 -15   0    0.22    0.17
   9 -15   0    0.03    0.15
  -9  15   0   -0.05    0.13
   8 -15   0    0.11    0.14
  -8  15   0    0.22    0.13
   7 -15   0    1.33    0.20
   7 -15   0    1.03    0.19
   7 -15   0    0.76    0.18
   6 -15   0    1.05    0.20
   6 -15   0    1.34    0.22
   6 -15   0    1.45    0.20
  -6  15   0    1.40    0.19
   5 -15   0    0.41    0.14
   5 -15   0    0.22    0.15
   5 -15   0    0.06    0.16
   5 -15   0    0.56    0.16
  -5  15   0    0.38    0.15
   4 -15   0    0.82    0.17
   4 -15   0    0.83    0.17
   4 -15   0    0.97    0.18
   4 -15   0    0.70    0.19
  -4  15   0    0.56    0.17
   3 -15   0    0.02    0.15
   3 -15   0    0.20    0.14
   3 -15   0   -0.04    0.17
   3 -15   0    0.02    0.14
  -3  15   0   -0.04    0.15
   2 -15   0    1.16    0.20
   2 -15   0    1.18    0.20
   2 -15   0    1.16    0.20
   2 -15   0    1.55    0.24
   2 -15   0    0.96    0.18
  -2  15   0    1.14    0.19
   1 -15   0    5.13    0.54
   1 -15   0    5.12    0.55
  -1  15   0    5.48    0.51
   0 -15   0    0.22    0.13
   0 -15   0   -0.01    0.14
   0 -15   0    0.08    0.13
   0 -15   0    0.15    0.14
   0  15   0    0.17    0.13
  -1 -15   0    1.25    0.22
  -1 -15   0    1.23    0.21
  -1 -15   0    0.92    0.17
  -1 -15   0    1.18    0.21
   1  15   0    1.23    0.17
  -2 -15   0    1.89    0.23
  -2 -15   0    1.68    0.26
  -2 -15   0    2.08    0.29
  -2 -15   0    1.22    0.23
   2  15   0    1.41    0.19
  -3 -15   0   -0.08    0.14
  -3 -15   0    0.28    0.15
  -3 -15   0    0.02    0.24
  -3 -15   0   -0.04    0.12
   3  15   0   -0.04    0.12
  -4 -15   0    0.09    0.12
  -4 -15   0    0.02    0.14
  -4 -15   0    0.13    0.16
   4  15   0   -0.16    0.11
  -5 -15   0    0.22    0.17
  -5 -15   0    0.02    0.14
  -5 -15   0    0.25    0.16
   5  15   0   -0.16    0.11
  -6 -15   0    0.15    0.16
  -6 -15   0    0.25    0.19
   6  15   0    0.19    0.12
   8 -16   0    1.00    0.18
   8 -16   0    0.60    0.20
   7 -16   0    0.47    0.17
   7 -16   0    0.23    0.16
   7 -16   0    0.21    0.15
  -7  16   0    0.50    0.17
   6 -16   0    1.96    0.30
  -6  16   0    2.28    0.27
   5 -16   0    0.51    0.15
   5 -16   0    0.49    0.15
  -5  16   0   -0.20    0.16
   4 -16   0    0.16    0.13
   4 -16   0   -0.03    0.14
   4 -16   0    0.25    0.15
   4 -16   0   -0.10    0.20
   3 -16   0    0.78    0.18
   3 -16   0    0.37    0.15
   3 -16   0    0.42    0.16
   2 -16   0    0.54    0.16
   2 -16   0    0.46    0.15
   2 -16   0    0.35    0.15
  -2  16   0    0.47    0.17
   1 -16   0    0.26    0.16
   1 -16   0    0.04    0.15
   1 -16   0   -0.15    0.12
  -1  16   0    0.28    0.16
   0 -16   0    1.33    0.22
   0 -16   0    1.43    0.22
   0 -16   0    1.24    0.23
   0  16   0    1.49    0.20
  -1 -16   0   -0.08    0.12
  -1 -16   0   -0.09    0.14
  -1 -16   0    0.02    0.14
  -1 -16   0   -0.20    0.19
   1  16   0   -0.10    0.13
  -2 -16   0    0.09    0.26
  -2 -16   0    0.53    0.16
  -2 -16   0    0.37    0.14
  -2 -16   0    0.65    0.17
   2  16   0    0.68    0.15
  -3 -16   0    0.04    0.14
  -3 -16   0    0.08    0.13
  -3 -16   0    0.25    0.16
  -4 -16   0   -0.31    0.13
  -4 -16   0    0.12    0.16
  -4 -16   0    0.02    0.15
   4  16   0    0.14    0.13
  -5 -16   0    0.16    0.18
  -5 -16   0    0.13    0.16
   5  16   0    0.28    0.13
   6 -17   0    2.12    0.30
   6 -17   0    1.95    0.32
   6 -17   0    1.88    0.29
   5 -17   0    1.16    0.27
   5 -17   0    1.36    0.22
   5 -17   0    1.87    0.26
   4 -17   0    0.29    0.16
   4 -17   0    0.13    0.15
   2 -17   0   -0.11    0.14
   2 -17   0   -0.20    0.18
   1 -17   0   -0.20    0.14
   1 -17   0   -0.06    0.18
   1 -17   0    0.03    0.15
   0 -17   0   -0.06    0.19
   0  17   0   -0.03    0.17
  -1 -17   0   -0.05    0.15
   1  17   0    0.02    0.16
  -2 -17   0    0.77    0.18
  -2 -17   0    0.60    0.18
   2  17   0    0.85    0.17
  -3 -17   0    0.26    0.17
  -3 -17   0    0.70    0.17
   3  17   0    0.47    0.15
   2 -18   0    0.73    0.23
   2 -18   0    0.60    0.18
   1 -18   0    0.07    0.16
   1 -18   0    0.56    0.16
  -1 -18   1   -0.04    0.16
  -1 -18   1   -0.16    0.15
   0 -18   1   -0.21    0.14
   0 -18   1    0.04    0.26
   0 -18   1    0.12    0.14
   1 -18   1    0.62    0.16
   1 -18   1    0.39    0.22
   2 -18   1    0.04    0.18
   2 -18   1    0.23    0.15
   2 -18   1    0.24    0.15
   3 -18   1    0.13    0.17
   3 -18   1    0.28    0.15
   4 -18   1    0.97    0.20
   4 -18   1    1.01    0.18
   4  17  -1    3.64    0.35
  -4 -17   1    3.59    0.40
  -4 -17   1    2.79    0.41
   3  17  -1    3.03    0.30
  -3 -17   1    2.54    0.33
  -3 -17   1    2.07    0.34
   2  17  -1    0.07    0.13
  -2 -17   1   -0.12    0.15
  -2 -17   1    0.10    0.28
   1  17  -1    0.66    0.15
  -1 -17   1    0.27    0.21
  -1 -17   1    0.93    0.18
  -1 -17   1    0.32    0.15
   0  17  -1    0.10    0.14
   0 -17   1    0.17    0.15
   0 -17   1   -0.08    0.14
  -1  17  -1    0.33    0.16
   1 -17   1    0.42    0.15
   1 -17   1    0.26    0.14
   1 -17   1    0.07    0.16
  -2  17  -1    0.01    0.16
   2 -17   1   -0.21    0.14
   2 -17   1    0.32    0.15
  -3  17  -1    0.17    0.17
   3 -17   1    0.25    0.15
   3 -17   1    0.58    0.15
   3 -17   1    0.42    0.15
  -4  17  -1    1.57    0.23
   4 -17   1    1.69    0.30
  -5  17  -1    0.13    0.16
   5 -17   1    0.16    0.21
   5 -17   1    0.22    0.14
   5 -17   1   -0.08    0.14
   6 -17   1   -0.26    0.15
   6 -17   1    0.09    0.15
   6 -17   1    0.39    0.19
   5  16  -1    0.11    0.12
  -5 -16   1    0.09    0.15
  -5 -16   1    0.27    0.18
  -4 -16   1   -0.04    0.15
   3  16  -1    4.21    0.42
  -3 -16   1    4.96    0.49
  -3 -16   1    4.06    0.47
  -3 -16   1    4.57    0.42
  -3 -16   1    3.35    0.53
   2  16  -1    1.42    0.18
  -2 -16   1    1.02    0.17
  -2 -16   1    0.97    0.23
  -2 -16   1    1.03    0.20
  -2 -16   1    1.26    0.21
   1  16  -1    0.33    0.13
  -1 -16   1    0.49    0.15
  -1 -16   1    0.22    0.15
  -1 -16   1    0.41    0.18
  -1 -16   1    0.06    0.12
   0  16  -1    0.88    0.15
   0 -16   1    0.81    0.18
   0 -16   1    0.82    0.17
   0 -16   1    0.58    0.17
  -1  16  -1    0.28    0.14
   1 -16   1    0.11    0.13
   1 -16   1    0.15    0.14
   1 -16   1   -0.12    0.14
  -2  16  -1    0.22    0.14
   2 -16   1    0.04    0.13
   2 -16   1   -0.02    0.14
   2 -16   1    0.15    0.14
  -3  16  -1    0.06    0.14
   3 -16   1    0.25    0.13
   3 -16   1    0.11    0.14
   3 -16   1    0.15    0.21
   3 -16   1    0.33    0.14
  -4  16  -1    1.24    0.20
   4 -16   1    1.66    0.25
   4 -16   1    1.47    0.22
   4 -16   1    1.38    0.21
   4 -16   1    1.72    0.25
   5 -16   1    0.36    0.14
   5 -16   1    0.29    0.14
   5 -16   1    0.59    0.18
  -6  16  -1    0.01    0.13
   6 -16   1    0.26    0.14
   6 -16   1    0.13    0.14
  -7  16  -1    0.86    0.15
   7 -16   1    0.53    0.17
   7 -16   1    0.57    0.16
   7 -16   1    0.60    0.16
  -8  16  -1    0.21    0.14
   8 -16   1    0.36    0.17
   8 -16   1    0.45    0.16
   7  15  -1    0.26    0.12
  -7 -15   1    0.19    0.16
   6  15  -1    0.43    0.23
   6  15  -1    0.17    0.12
  -6 -15   1    0.26    0.20
   5  15  -1    1.98    0.24
  -5 -15   1    1.56    0.26
  -5 -15   1    2.08    0.26
  -5 -15   1    2.40    0.31
   4  15  -1    0.05    0.11
  -4 -15   1    0.19    0.16
  -4 -15   1    0.15    0.15
  -4 -15   1    0.20    0.13
   3  15  -1    2.28    0.26
  -3 -15   1    1.65    0.29
  -3 -15   1    2.07    0.27
  -3 -15   1    2.65    0.30
  -3 -15   1    1.95    0.29
   2  15  -1    1.59    0.21
  -2 -15   1    1.59    0.25
  -2 -15   1    1.19    0.19
  -2 -15   1    1.26    0.23
  -2 -15   1    1.41    0.22
   1  15  -1    0.47    0.12
  -1 -15   1    0.30    0.15
  -1 -15   1    0.32    0.15
  -1 -15   1    0.47    0.16
  -1 -15   1    0.24    0.12
   0  15  -1    1.68    0.22
   0 -15   1    1.91    0.25
   0 -15   1    1.28    0.23
   0 -15   1    1.50    0.21
  -1  15  -1    1.98    0.25
   1 -15   1    1.79    0.28
   1 -15   1    1.69    0.25
   1 -15   1    2.36    0.28
   1 -15   1    1.94    0.28
  -2  15  -1    0.76    0.15
   2 -15   1    0.59    0.15
   2 -15   1    0.80    0.18
   2 -15   1    0.55    0.16
   2 -15   1    0.58    0.21
  -3  15  -1    2.08    0.27
   3 -15   1    1.98    0.28
   3 -15   1    1.66    0.25
   3 -15   1    2.02    0.28
   3 -15   1    2.18    0.30
  -4  15  -1    0.28    0.14
   4 -15   1    0.58    0.17
   4 -15   1    0.63    0.16
   4 -15   1    0.37    0.14
   4 -15   1    0.60    0.16
  -5  15  -1    0.13    0.12
   5 -15   1   -0.08    0.13
   5 -15   1    0.21    0.13
   5 -15   1    0.21    0.15
  -6  15  -1    0.91    0.16
   6 -15   1    0.75    0.17
   6 -15   1    1.19    0.20
   6 -15   1    0.99    0.18
  -7  15  -1    0.03    0.11
   7 -15   1   -0.03    0.13
   7 -15   1   -0.07    0.13
   7 -15   1    0.02    0.13
  -8  15  -1    2.27    0.26
  -9  15  -1    1.78    0.26
   9 -15   1    2.16    0.28
   9 -15   1    2.63    0.33
   8  14  -1   -0.21    0.16
   8  14  -1    0.42    0.13
  -8 -14   1    0.17    0.15
   7  14  -1    0.27    0.17
   7  14  -1    0.36    0.13
  -7 -14   1    0.33    0.16
  -7 -14   1    0.26    0.21
   6  14  -1    0.51    0.13
   6  14  -1    0.55    0.18
  -6 -14   1    0.32    0.15
  -6 -14   1    0.45    0.18
  -6 -14   1    0.52    0.15
   5  14  -1   -0.01    0.10
   5  14  -1    0.09    0.16
  -5 -14   1   -0.03    0.15
  -5 -14   1   -0.04    0.13
  -5 -14   1    0.04    0.13
   4  14  -1   -0.25    0.16
   4  14  -1    0.03    0.10
  -4 -14   1    0.21    0.19
  -4 -14   1   -0.13    0.12
  -4 -14   1    0.15    0.12
  -4 -14   1    0.08    0.15
   3  14  -1    3.41    0.42
   3  14  -1    3.95    0.36
  -3 -14   1    3.28    0.41
  -3 -14   1    4.15    0.42
  -3 -14   1    2.90    0.39
  -3 -14   1    3.45    0.35
   2  14  -1    0.01    0.10
  -2 -14   1    0.11    0.13
  -2 -14   1    0.07    0.14
  -2 -14   1    0.18    0.15
  -2 -14   1    0.00    0.13
   1  14  -1    0.19    0.11
  -1 -14   1    0.34    0.15
  -1 -14   1    0.23    0.13
  -1 -14   1    0.30    0.15
  -1 -14   1    0.15    0.11
   0  14  -1    0.21    0.11
   0 -14   1    0.09    0.13
   0 -14   1    0.01    0.12
   0 -14   1    0.05    0.13
   0 -14   1    0.21    0.12
  -1  14  -1    0.44    0.13
   1 -14   1    0.61    0.13
   1 -14   1    0.59    0.16
   1 -14   1    0.43    0.19
   1 -14   1    0.32    0.14
   1 -14   1    0.42    0.14
  -2  14  -1    1.25    0.18
   2 -14   1    1.48    0.22
   2 -14   1    1.14    0.18
   2 -14   1    1.65    0.23
   2 -14   1    1.12    0.20
   2 -14   1    1.36    0.21
  -3  14  -1    2.36    0.26
   3 -14   1    1.99    0.29
   3 -14   1    2.22    0.30
   3 -14   1    2.07    0.28
   3 -14   1    1.93    0.28
  -4  14  -1    0.57    0.14
   4 -14   1    0.63    0.16
   4 -14   1    0.66    0.17
   4 -14   1    0.45    0.16
   4 -14   1    0.78    0.17
  -5  14  -1    0.19    0.11
   5 -14   1   -0.03    0.12
   5 -14   1    0.15    0.14
   5 -14   1    0.12    0.12
   5 -14   1    0.05    0.13
  -6  14  -1    1.75    0.24
   6 -14   1    2.14    0.28
   6 -14   1    2.43    0.28
  -7  14  -1    1.17    0.16
   7 -14   1    1.17    0.20
   7 -14   1    1.28    0.20
   7 -14   1    0.75    0.19
   7 -14   1    1.41    0.24
  -8  14  -1    1.86    0.24
   8 -14   1    1.92    0.28
   8 -14   1    2.54    0.28
   8 -14   1    2.32    0.34
   9 -14   1    0.98    0.22
   9 -14   1    0.63    0.16
 -10  14  -1    0.60    0.12
  10 -14   1    0.57    0.21
  10 -14   1    0.66    0.18
   9  13  -1    0.29    0.16
   9  13  -1    0.56    0.14
  -9 -13   1    0.19    0.16
   8  13  -1    1.58    0.20
  -8 -13   1    1.33    0.31
  -8 -13   1    1.62    0.23
   7  13  -1    1.09    0.16
   7  13  -1    0.86    0.18
  -7 -13   1    0.67    0.19
  -7 -13   1    1.04    0.19
  -7 -13   1    1.02    0.23
   6  13  -1    0.10    0.14
   6  13  -1    0.17    0.10
  -6 -13   1    0.28    0.14
  -6 -13   1    0.18    0.17
  -6 -13   1    0.14    0.13
   5  13  -1    0.04    0.10
   5  13  -1    0.28    0.14
  -5 -13   1    0.30    0.14
  -5 -13   1    0.14    0.18
  -5 -13   1    0.22    0.12
  -5 -13   1    0.10    0.16
   4  13  -1    0.30    0.15
   4  13  -1    0.20    0.10
  -4 -13   1    0.00    0.15
  -4 -13   1    0.27    0.12
  -4 -13   1    0.17    0.13
  -4 -13   1    0.26    0.14
   3  13  -1    1.48    0.22
   3  13  -1    1.35    0.20
  -3 -13   1    1.08    0.21
  -3 -13   1    1.65    0.24
  -3 -13   1    1.70    0.25
   2  13  -1    0.06    0.09
   2  13  -1    0.15    0.16
   1  13  -1    0.27    0.11
   1  13  -1    0.52    0.17
  -1 -13   1    0.18    0.12
  -1 -13   1    0.27    0.09
  -1 -13   1    0.21    0.13
  -1 -13   1    0.27    0.13
   0  13  -1    1.10    0.17
   0 -13   1    1.40    0.25
   0 -13   1    1.38    0.20
   0 -13   1    1.68    0.23
   0 -13   1    1.29    0.18
   0 -13   1    1.70    0.23
  -1  13  -1    1.50    0.17
   1 -13   1    1.42    0.22
   1 -13   1    1.67    0.24
   1 -13   1    0.98    0.20
   1 -13   1    1.65    0.22
   1 -13   1    0.99    0.16
  -2  13  -1    3.76    0.41
   2 -13   1    4.22    0.41
   2 -13   1    4.32    0.45
   2 -13   1    4.50    0.46
   2 -13   1    4.53    0.45
  -3  13  -1    1.03    0.15
   3 -13   1    0.68    0.17
   3 -13   1    0.90    0.18
   3 -13   1    0.95    0.17
   3 -13   1    1.13    0.19
  -4  13  -1    0.41    0.13
   4 -13   1    0.51    0.14
  -5  13  -1    2.37    0.30
   5 -13   1    2.80    0.34
   5 -13   1    2.74    0.33
   5 -13   1    2.61    0.32
   5 -13   1    2.73    0.37
   5 -13   1    3.30    0.34
  -6  13  -1    1.56    0.20
   6 -13   1    1.16    0.20
   6 -13   1    0.89    0.21
   6 -13   1    1.46    0.21
   6 -13   1    1.34    0.21
  -7  13  -1    1.70    0.23
   7 -13   1    2.19    0.27
   7 -13   1    1.57    0.24
   7 -13   1    1.93    0.25
   7 -13   1    1.61    0.26
  -8  13  -1   -0.01    0.10
   8 -13   1    0.07    0.14
   8 -13   1    0.08    0.14
   8 -13   1   -0.13    0.15
   8 -13   1    0.05    0.13
  -9  13  -1    0.11    0.11
   9 -13   1   -0.06    0.15
   9 -13   1    0.30    0.16
   9 -13   1   -0.06    0.14
  10 -13   1    2.27    0.32
 -11  13  -1    0.27    0.11
  11 -13   1    0.22    0.19
  11 -13   1    0.09    0.16
  10  12  -1    0.60    0.16
  10  12  -1    0.88    0.18
 -10 -12   1    0.64    0.18
  -9 -12   1    0.07    0.15
   8  12  -1   -0.03    0.11
   8  12  -1    0.23    0.14
  -8 -12   1    0.10    0.21
  -8 -12   1   -0.06    0.13
   7  12  -1   -0.02    0.10
   7  12  -1    0.05    0.13
  -7 -12   1    0.02    0.15
  -7 -12   1   -0.14    0.12
  -7 -12   1   -0.07    0.17
   6  12  -1    0.17    0.10
   6  12  -1    0.21    0.13
  -6 -12   1    0.16    0.13
  -6 -12   1    0.24    0.16
  -6 -12   1    0.33    0.14
   5  12  -1   -0.03    0.10
   5  12  -1   -0.15    0.12
  -5 -12   1    0.03    0.13
  -5 -12   1    0.16    0.16
  -5 -12   1   -0.01    0.14
  -5 -12   1   -0.22    0.11
   4  12  -1    3.36    0.33
   4  12  -1    2.57    0.30
  -4 -12   1    3.32    0.35
  -4 -12   1    2.41    0.36
   3  12  -1    0.98    0.17
   3  12  -1    0.92    0.13
  -3 -12   1    0.87    0.18
  -3 -12   1    0.98    0.17
  -3 -12   1    0.66    0.14
   2  12  -1    0.08    0.09
   2  12  -1    0.25    0.14
  -2 -12   1    0.23    0.13
  -2 -12   1   -0.01    0.08
  -2 -12   1   -0.02    0.11
  -2 -12   1    0.00    0.09
   0  12  -1    4.48    0.47
   0 -12   1    4.22    0.49
   0 -12   1    4.17    0.49
   0 -12   1    4.60    0.42
   0 -12   1    5.10    0.47
  -1  12  -1    6.59    0.57
   1 -12   1    5.64    0.62
   1 -12   1    6.72    0.62
  -2  12  -1    1.28    0.16
   2 -12   1    0.96    0.16
   2 -12   1    1.24    0.19
   2 -12   1    1.11    0.18
   2 -12   1    1.38    0.20
   2 -12   1    0.99    0.19
  -3  12  -1    3.60    0.40
   3 -12   1    4.15    0.43
   3 -12   1    4.75    0.45
   3 -12   1    4.32    0.40
  -4  12  -1   -0.05    0.10
   4 -12   1   -0.02    0.09
   4 -12   1    0.16    0.16
   4 -12   1   -0.08    0.08
   4 -12   1    0.22    0.13
   4 -12   1   -0.13    0.11
  -5  12  -1    1.57    0.21
  -5  12  -1    1.33    0.24
   5 -12   1    1.28    0.21
   5 -12   1    1.58    0.22
   5 -12   1    1.47    0.23
   5 -12   1    1.60    0.23
  -6  12  -1    1.33    0.23
   6 -12   1    1.55    0.22
   6 -12   1    1.32    0.22
  -7  12  -1    0.96    0.14
  -7  12  -1    0.98    0.21
   7 -12   1    0.93    0.18
   7 -12   1    0.65    0.15
   7 -12   1    0.93    0.16
   7 -12   1    0.62    0.17
  -8  12  -1    2.55    0.26
   8 -12   1    1.84    0.30
   8 -12   1    2.62    0.30
   8 -12   1    2.12    0.31
  -9  12  -1    2.56    0.25
  -9  12  -1    1.93    0.27
   9 -12   1    2.19    0.31
   9 -12   1    1.69    0.28
   9 -12   1    2.30    0.30
 -10  12  -1   -0.01    0.10
  10 -12   1    0.30    0.17
  10 -12   1    0.12    0.14
  10 -12   1    0.01    0.13
 -11  12  -1    0.18    0.10
 -11  12  -1   -0.02    0.19
  11 -12   1    0.22    0.17
  11 -12   1   -0.04    0.24
  10  11  -1    0.41    0.15
  10  11  -1    0.31    0.14
   9  11  -1    0.21    0.13
   9  11  -1    0.02    0.12
  -9 -11   1    0.00    0.14
  -9 -11   1    0.03    0.13
   8  11  -1    0.39    0.12
   8  11  -1    0.60    0.14
  -8 -11   1    0.48    0.20
  -8 -11   1    0.28    0.13
  -8 -11   1    0.35    0.20
  -8 -11   1    0.35    0.12
   7  11  -1    0.35    0.11
   7  11  -1    0.17    0.13
  -7 -11   1    0.00    0.11
  -7 -11   1    0.09    0.15
  -7 -11   1    0.22    0.16
  -7 -11   1    0.28    0.13
   6  11  -1    2.53    0.27
   6  11  -1    1.75    0.24
  -6 -11   1    2.12    0.30
  -6 -11   1    1.99    0.27
  -6 -11   1    2.22    0.29
  -6 -11   1    2.01    0.25
   5  11  -1    0.21    0.09
   5  11  -1    0.23    0.13
  -5 -11   1    0.07    0.14
  -5 -11   1    0.19    0.12
  -5 -11   1    0.31    0.10
  -5 -11   1    0.18    0.11
  -5 -11   1    0.35    0.13
   4  11  -1    4.15    0.41
  -4 -11   1    4.48    0.45
  -4 -11   1    4.69    0.42
  -4 -11   1    4.19    0.41
   2  11  -1    4.60    0.41
   2  11  -1    4.81    0.45
   2  11  -1    4.36    0.42
  -2 -11   1    5.11    0.46
  -2 -11   1    4.60    0.47
  -2 -11   1    4.13    0.42
   1  11  -1    1.53    0.19
   1  11  -1    1.82    0.24
   1  11  -1    1.95    0.20
  -1 -11   1    2.03    0.25
  -1 -11   1    1.54    0.22
  -1 -11   1    1.68    0.23
  -1 -11   1    1.59    0.20
   0  11  -1    0.30    0.14
   0  11  -1    0.44    0.10
   0  11  -1    0.21    0.07
   0 -11   1    0.63    0.13
   0 -11   1    0.17    0.10
   0 -11   1    0.41    0.10
   0 -11   1    0.47    0.13
   0 -11   1    0.40    0.13
  -1  11  -1    0.56    0.11
  -1  11  -1    0.60    0.15
  -1  11  -1    0.44    0.08
   1 -11   1    0.59    0.11
   1 -11   1    0.38    0.13
   1 -11   1    0.62    0.13
   1 -11   1    0.55    0.12
  -2  11  -1    0.20    0.07
  -2  11  -1    0.09    0.10
  -2  11  -1    0.12    0.15
   2 -11   1    0.17    0.09
   2 -11   1    0.22    0.09
   2 -11   1    0.18    0.11
   2 -11   1    0.10    0.11
   2 -11   1    0.11    0.10
  -3  11  -1    0.19    0.15
  -3  11  -1    0.02    0.07
  -3  11  -1    0.08    0.09
   3 -11   1   -0.06    0.10
   3 -11   1   -0.02    0.10
   3 -11   1    0.10    0.08
   3 -11   1    0.19    0.13
   3 -11   1   -0.07    0.11
   3 -11   1    0.00    0.10
  -4  11  -1    0.64    0.13
  -4  11  -1    0.79    0.12
  -4  11  -1    0.47    0.17
   4 -11   1    0.70    0.15
   4 -11   1    0.84    0.15
   4 -11   1    1.02    0.14
   4 -11   1    0.90    0.16
   4 -11   1    0.73    0.15
  -5  11  -1    0.60    0.16
  -5  11  -1    0.23    0.09
   5 -11   1    0.09    0.09
   5 -11   1    0.11    0.08
   5 -11   1    0.24    0.13
   5 -11   1    0.03    0.12
   5 -11   1    0.04    0.11
  -6  11  -1    0.39    0.16
  -6  11  -1    0.23    0.10
   6 -11   1    0.17    0.11
   6 -11   1    0.11    0.12
   6 -11   1    0.35    0.14
   6 -11   1    0.30    0.14
  -7  11  -1    0.37    0.16
   7 -11   1    0.21    0.14
  -8  11  -1    0.56    0.15
  -8  11  -1    0.29    0.11
   8 -11   1    0.38    0.14
   8 -11   1    0.26    0.15
   8 -11   1    0.24    0.13
   8 -11   1    0.58    0.14
  -9  11  -1   21.99    2.01
   9 -11   1   23.20    2.14
 -10  11  -1    0.09    0.14
 -10  11  -1    0.32    0.10
  10 -11   1    0.45    0.16
  10 -11   1    0.14    0.13
  10 -11   1    0.18    0.16
 -11  11  -1    0.59    0.12
  11 -11   1    0.59    0.22
  11 -11   1    0.59    0.17
  11 -11   1    0.44    0.14
 -12  11  -1    0.55    0.12
  12 -11   1    0.37    0.14
  11  10  -1    0.42    0.14
 -11 -10   1    0.26    0.15
 -11 -10   1    0.36    0.15
  10  10  -1    0.64    0.15
  10  10  -1    0.32    0.15
 -10 -10   1    0.35    0.15
 -10 -10   1    0.46    0.13
   9  10  -1    1.18    0.17
   9  10  -1    1.14    0.18
  -9 -10   1    1.22    0.18
  -9 -10   1    1.35    0.27
   8  10  -1    0.23    0.13
   8  10  -1    0.32    0.11
  -8 -10   1    0.16    0.17
  -8 -10   1    0.32    0.19
  -8 -10   1    0.33    0.12
   7  10  -1    0.16    0.10
   7  10  -1    0.27    0.12
  -7 -10   1    0.18    0.13
  -7 -10   1    0.16    0.10
  -7 -10   1    0.06    0.14
   6  10  -1    0.82    0.14
   6  10  -1    0.39    0.11
  -6 -10   1    0.67    0.12
  -6 -10   1    0.62    0.14
  -6 -10   1    0.52    0.16
   5  10  -1    0.08    0.10
   5  10  -1   -0.11    0.07
  -5 -10   1    0.05    0.12
  -5 -10   1   -0.02    0.10
  -5 -10   1    0.04    0.08
  -5 -10   1   -0.18    0.08
   3  10  -1    2.57    0.26
   3  10  -1    3.02    0.29
   3  10  -1    2.67    0.27
  -3 -10   1    3.00    0.27
  -3 -10   1    2.76    0.28
  -3 -10   1    3.17    0.31
  -3 -10   1    2.52    0.32
   2  10  -1    8.12    0.69
   2  10  -1    7.90    0.65
  -2 -10   1    7.30    0.76
  -2 -10   1    7.74    0.71
   1  10  -1   -0.02    0.05
   1  10  -1   -0.10    0.10
   1  10  -1   -0.02    0.07
  -1 -10   1    0.14    0.07
  -1 -10   1    0.06    0.10
  -1 -10   1    0.28    0.13
  -1 -10   1   -0.06    0.08
  -1 -10   1    0.06    0.06
  -1 -10   1   -0.02    0.09
   0  10  -1    1.19    0.12
   0  10  -1    1.45    0.17
   0 -10   1    0.85    0.16
   0 -10   1    0.97    0.16
   0 -10   1    0.79    0.15
   0 -10   1    1.43    0.19
  -1  10  -1    2.33    0.26
  -1  10  -1    2.25    0.29
  -1  10  -1    2.68    0.23
   1 -10   1    2.35    0.38
   1 -10   1    2.79    0.28
   1 -10   1    2.47    0.25
  -2  10  -1    2.70    0.29
  -2  10  -1    2.38    0.22
  -2  10  -1    2.36    0.25
   2 -10   1    2.59    0.27
   2 -10   1    2.66    0.25
   2 -10   1    2.51    0.30
   2 -10   1    2.12    0.29
   2 -10   1    2.34    0.26
   2 -10   1    2.36    0.26
  -3  10  -1    8.10    0.73
  -3  10  -1    8.59    0.69
   3 -10   1    8.87    0.78
   3 -10   1    7.54    0.78
  -4  10  -1    4.27    0.37
  -4  10  -1    3.94    0.40
  -4  10  -1    3.57    0.34
   4 -10   1    3.76    0.40
   4 -10   1    4.33    0.41
   4 -10   1    3.89    0.40
   4 -10   1    3.81    0.40
  -5  10  -1    0.13    0.08
  -5  10  -1    0.08    0.13
  -5  10  -1    0.05    0.08
   5 -10   1    0.11    0.08
   5 -10   1    0.00    0.07
   5 -10   1   -0.02    0.10
   5 -10   1    0.12    0.10
   5 -10   1    0.05    0.10
  -6  10  -1    0.10    0.14
  -6  10  -1    0.13    0.09
   6 -10   1    0.29    0.11
   6 -10   1    0.08    0.10
   6 -10   1    0.16    0.11
   6 -10   1    0.06    0.11
  -7  10  -1    0.02    0.13
  -7  10  -1    0.21    0.08
   7 -10   1    0.16    0.12
   7 -10   1    0.32    0.12
   7 -10   1    0.23    0.12
   8 -10   1    0.24    0.13
   8 -10   1    0.32    0.11
  -9  10  -1    8.64    0.74
   9 -10   1    7.75    0.78
   9 -10   1    7.30    0.78
   9 -10   1    7.76    0.77
 -10  10  -1    1.37    0.19
 -10  10  -1    0.92    0.14
  10 -10   1    1.09    0.20
  10 -10   1    1.02    0.18
  10 -10   1    0.82    0.20
 -11  10  -1    0.23    0.14
 -11  10  -1    0.22    0.10
  11 -10   1    0.49    0.21
  11 -10   1    0.10    0.17
  11 -10   1    0.26    0.13
 -12  10  -1    0.57    0.16
  12 -10   1    0.78    0.25
  12   9  -1    0.24    0.14
 -12  -9   1    0.22    0.14
 -12  -9   1   -0.02    0.14
  11   9  -1    0.14    0.14
  11   9  -1    0.36    0.20
  10   9  -1    0.63    0.16
  10   9  -1    0.69    0.15
 -10  -9   1    0.61    0.13
   9   9  -1    0.31    0.13
   9   9  -1    0.31    0.12
  -9  -9   1    0.35    0.21
  -9  -9   1    0.13    0.10
   8   9  -1    1.90    0.22
   8   9  -1    1.62    0.24
  -8  -9   1    1.42    0.26
  -8  -9   1    1.67    0.25
  -8  -9   1    1.84    0.23
   7   9  -1    1.90    0.24
   7   9  -1    1.66    0.21
  -7  -9   1    1.95    0.24
  -7  -9   1    1.66    0.25
  -7  -9   1    1.69    0.22
   6   9  -1    3.65    0.35
   6   9  -1    3.62    0.37
  -6  -9   1    3.93    0.37
  -6  -9   1    3.32    0.36
  -6  -9   1    4.05    0.41
   5   9  -1    0.85    0.14
   5   9  -1    1.03    0.14
   5   9  -1    1.15    0.15
  -5  -9   1    0.75    0.16
  -5  -9   1    1.16    0.15
  -5  -9   1    0.88    0.14
   4   9  -1    1.79    0.20
   4   9  -1    1.65    0.17
   4   9  -1    1.91    0.17
  -4  -9   1    1.70    0.18
  -4  -9   1    1.31    0.18
  -4  -9   1    1.25    0.21
   3   9  -1   11.64    1.06
   3   9  -1   12.92    1.09
  -3  -9   1   11.96    1.04
   2   9  -1    9.81    0.83
   2   9  -1   10.31    0.88
  -2  -9   1   10.15    0.86
  -2  -9   1   10.00    0.99
  -2  -9   1    9.95    0.91
   1   9  -1    4.48    0.39
   1   9  -1    3.99    0.36
  -1  -9   1    4.44    0.39
  -1  -9   1    4.34    0.40
   0  -9   1    7.02    0.74
   0  -9   1    7.70    0.70
   0  -9   1    7.35    0.70
   0  -9   1    7.71    0.74
   0  -9   1    7.35    0.65
  -1   9  -1    2.71    0.27
  -1   9  -1    2.09    0.25
  -1   9  -1    2.31    0.22
   1  -9   1    2.63    0.27
   1  -9   1    2.25    0.24
   1  -9   1    2.16    0.25
   1  -9   1    2.69    0.26
  -2   9  -1    0.16    0.04
  -2   9  -1    0.18    0.07
  -2   9  -1    0.21    0.09
  -2   9  -1    0.24    0.12
   2  -9   1    0.11    0.10
   2  -9   1    0.23    0.08
   2  -9   1    0.08    0.07
   2  -9   1    0.03    0.06
   2  -9   1    0.11    0.10
   2  -9   1   -0.29    0.17
  -3   9  -1    0.13    0.07
  -3   9  -1    0.06    0.11
  -3   9  -1   -0.02    0.08
  -3   9  -1    0.10    0.04
   3  -9   1    0.10    0.09
   3  -9   1    0.11    0.07
   3  -9   1    0.05    0.07
   3  -9   1    0.02    0.07
   3  -9   1   -0.01    0.09
  -4   9  -1    1.74    0.18
  -4   9  -1    2.05    0.21
   4  -9   1    2.23    0.24
   4  -9   1    2.17    0.22
   4  -9   1    2.06    0.23
   4  -9   1    1.67    0.25
   4  -9   1    2.00    0.22
   4  -9   1    1.86    0.20
  -5   9  -1    0.12    0.11
  -5   9  -1   -0.03    0.06
  -5   9  -1    0.14    0.08
   5  -9   1   -0.13    0.10
   5  -9   1    0.12    0.09
   5  -9   1    0.11    0.07
   5  -9   1    0.03    0.10
   5  -9   1   -0.01    0.07
   5  -9   1    0.03    0.08
  -6   9  -1    0.30    0.11
  -6   9  -1    0.36    0.09
  -6   9  -1    0.61    0.10
   6  -9   1    0.45    0.10
   6  -9   1    0.29    0.11
   6  -9   1    0.24    0.10
   6  -9   1    0.36    0.09
  -7   9  -1    0.38    0.09
  -7   9  -1    0.04    0.11
   7  -9   1    0.17    0.12
   7  -9   1    0.46    0.10
   7  -9   1    0.14    0.11
   7  -9   1    0.40    0.10
   7  -9   1    0.22    0.09
  -8   9  -1    1.24    0.19
  -8   9  -1    1.46    0.21
   8  -9   1    1.79    0.24
   8  -9   1    1.93    0.24
   8  -9   1    1.73    0.21
  -9   9  -1    0.36    0.14
  -9   9  -1    0.69    0.12
   9  -9   1    0.54    0.13
   9  -9   1    0.62    0.14
   9  -9   1    0.61    0.16
   9  -9   1    0.41    0.16
 -10   9  -1    3.66    0.39
 -10   9  -1    3.53    0.37
  10  -9   1    3.24    0.42
  10  -9   1    4.29    0.42
  10  -9   1    3.60    0.43
  10  -9   1    4.21    0.40
 -11   9  -1    1.51    0.20
 -11   9  -1    1.26    0.21
  11  -9   1    1.85    0.28
  11  -9   1    1.40    0.23
  11  -9   1    1.59    0.24
 -12   9  -1    0.03    0.13
 -12   9  -1    0.10    0.11
  12  -9   1    0.27    0.26
  12  -9   1    0.09    0.13
  13  -9   1    0.20    0.13
  12   8  -1    0.79    0.17
 -12  -8   1    0.64    0.14
  11   8  -1    0.19    0.13
  11   8  -1   -0.03    0.26
 -11  -8   1    0.21    0.11
  10   8  -1    1.23    0.18
  10   8  -1    0.82    0.17
  10   8  -1    1.06    0.27
 -10  -8   1    1.17    0.17
   9   8  -1   -0.06    0.11
   9   8  -1    0.22    0.21
   9   8  -1    0.14    0.11
  -9  -8   1    0.29    0.19
  -9  -8   1    0.06    0.10
   8   8  -1    0.58    0.22
  -8  -8   1    0.52    0.16
  -8  -8   1    0.16    0.18
   7   8  -1    0.80    0.14
   7   8  -1    0.78    0.23
  -7  -8   1    0.87    0.17
  -7  -8   1    0.79    0.15
   6   8  -1    0.86    0.13
   6   8  -1    0.64    0.11
   6   8  -1    0.92    0.15
  -6  -8   1    0.61    0.11
  -6  -8   1    0.66    0.14
  -6  -8   1    0.68    0.14
   5   8  -1    0.06    0.06
   5   8  -1    0.03    0.08
   5   8  -1    0.05    0.08
  -5  -8   1    0.05    0.08
  -5  -8   1   -0.01    0.07
  -5  -8   1    0.07    0.10
   4   8  -1    4.17    0.39
  -4  -8   1    3.53    0.43
  -4  -8   1    4.18    0.39
  -4  -8   1    4.55    0.38
   3   8  -1    8.12    0.69
  -3  -8   1    8.73    0.72
  -3  -8   1    8.11    0.82
   2   8  -1    2.35    0.20
   2   8  -1    2.41    0.23
   2   8  -1    2.57    0.24
   2   8  -1    2.12    0.22
  -2  -8   1    2.26    0.23
  -2  -8   1    2.32    0.26
  -2  -8   1    2.22    0.22
  -2  -8   1    2.35    0.22
  -2  -8   1    2.71    0.28
  -2  -8   1    2.00    0.24
   1   8  -1    2.79    0.24
   1   8  -1    2.47    0.27
   1   8  -1    2.44    0.22
   1   8  -1    2.72    0.25
  -1  -8   1    2.60    0.28
  -1  -8   1    2.78    0.26
  -1  -8   1    1.98    0.31
   0   8  -1   15.13    1.26
   0   8  -1   15.51    1.33
   0   8  -1   15.50    1.26
  -1   8  -1    7.23    0.58
  -1   8  -1    7.08    0.65
  -1   8  -1    7.05    0.58
   1  -8   1    6.63    0.64
   1  -8   1    7.34    0.61
  -2   8  -1    2.58    0.26
  -2   8  -1    2.55    0.28
  -2   8  -1    2.53    0.22
   2  -8   1    3.02    0.25
   2  -8   1    2.44    0.25
   2  -8   1    2.27    0.27
   2  -8   1    3.26    0.33
   2  -8   1    2.84    0.29
  -3   8  -1    1.44    0.18
  -3   8  -1    1.13    0.13
  -3   8  -1    1.09    0.13
   3  -8   1    0.89    0.15
   3  -8   1    0.96    0.15
   3  -8   1    0.75    0.13
   3  -8   1    0.96    0.14
   3  -8   1    1.03    0.15
   3  -8   1    0.97    0.15
  -4   8  -1    4.56    0.37
  -4   8  -1    4.35    0.35
  -4   8  -1    3.94    0.37
  -4   8  -1    4.14    0.40
   4  -8   1    3.87    0.38
   4  -8   1    3.64    0.40
  -5   8  -1    0.97    0.10
  -5   8  -1    0.85    0.14
  -5   8  -1    0.97    0.13
   5  -8   1    0.64    0.13
   5  -8   1    1.03    0.13
   5  -8   1    0.65    0.14
   5  -8   1    1.06    0.15
  -6   8  -1    4.78    0.40
   6  -8   1    4.93    0.46
   6  -8   1    4.69    0.46
   6  -8   1    4.55    0.47
   6  -8   1    4.37    0.44
  -7   8  -1    0.09    0.08
  -7   8  -1    0.17    0.11
  -7   8  -1    0.20    0.10
   7  -8   1    0.21    0.11
   7  -8   1    0.14    0.08
   7  -8   1    0.13    0.10
   7  -8   1    0.17    0.08
  -8   8  -1    0.89    0.13
   8  -8   1    1.26    0.18
   8  -8   1    0.76    0.14
   8  -8   1    1.17    0.18
   8  -8   1    1.06    0.17
  -9   8  -1    1.19    0.17
   9  -8   1    1.27    0.19
   9  -8   1    0.97    0.16
   9  -8   1    0.86    0.19
 -10   8  -1    2.29    0.25
 -10   8  -1    1.92    0.28
  10  -8   1    2.09    0.29
  10  -8   1    2.57    0.28
  10  -8   1    2.36    0.33
  10  -8   1    2.54    0.31
 -11   8  -1    2.82    0.34
 -11   8  -1    2.86    0.31
  11  -8   1    3.18    0.35
  11  -8   1    2.96    0.38
 -12   8  -1    0.20    0.13
 -12   8  -1    0.49    0.11
  12  -8   1    0.32    0.13
  13  -8   1    0.10    0.13
  13   7  -1    0.43    0.16
 -13  -7   1    0.06    0.12
  12   7  -1    3.40    0.51
  12   7  -1    4.13    0.41
 -12  -7   1    3.95    0.40
  11   7  -1    1.57    0.29
  11   7  -1    1.99    0.27
 -11  -7   1    2.35    0.27
  10   7  -1    0.36    0.19
  10   7  -1    0.25    0.13
  10   7  -1    0.51    0.14
 -10  -7   1    0.45    0.13
   9   7  -1    0.60    0.14
   9   7  -1    0.70    0.13
  -9  -7   1    0.56    0.13
   8   7  -1    1.16    0.18
   8   7  -1    1.19    0.23
   8   7  -1    1.40    0.18
  -8  -7   1    1.36    0.18
  -8  -7   1    1.02    0.21
  -8  -7   1    1.14    0.23
   7   7  -1    0.80    0.13
   7   7  -1    0.63    0.19
   7   7  -1    1.20    0.20
   7   7  -1    0.68    0.12
  -7  -7   1    0.67    0.16
  -7  -7   1    1.02    0.15
  -7  -7   1    0.73    0.13
   6   7  -1    0.40    0.10
   6   7  -1    0.40    0.11
   6   7  -1    0.33    0.08
   6   7  -1    0.33    0.17
  -6  -7   1    0.30    0.11
  -6  -7   1    0.36    0.08
  -6  -7   1    0.40    0.11
   5   7  -1    5.03    0.48
   5   7  -1    4.95    0.50
  -5  -7   1    5.36    0.54
  -5  -7   1    5.55    0.50
  -5  -7   1    5.80    0.48
   4   7  -1    1.78    0.18
   4   7  -1    2.26    0.25
   4   7  -1    1.75    0.17
  -4  -7   1    1.69    0.22
  -4  -7   1    1.61    0.21
  -4  -7   1    1.94    0.20
   3   7  -1    0.07    0.07
   3   7  -1    0.19    0.08
   3   7  -1    0.07    0.04
   3   7  -1    0.09    0.05
  -3  -7   1    0.00    0.05
  -3  -7   1    0.08    0.07
  -3  -7   1    0.12    0.08
  -3  -7   1    0.03    0.06
   2   7  -1    0.18    0.06
   2   7  -1    0.30    0.06
   2   7  -1    0.25    0.04
   2   7  -1    0.21    0.08
  -2  -7   1    0.24    0.09
  -2  -7   1    0.17    0.07
  -2  -7   1    0.17    0.05
   1   7  -1  124.75   11.09
  -1  -7   1  137.42   12.37
  -1  -7   1  125.67   11.52
   0   7  -1    2.92    0.26
   0  -7   1    3.18    0.25
   0  -7   1    3.20    0.25
   0  -7   1    2.77    0.29
  -1   7  -1    3.79    0.33
  -1   7  -1    4.15    0.34
   1  -7   1    4.10    0.38
   1  -7   1    4.20    0.36
  -2   7  -1    1.55    0.13
   2  -7   1    1.34    0.16
   2  -7   1    1.45    0.17
   3  -7   1   12.94    1.17
   3  -7   1   13.11    1.06
  -4   7  -1    0.12    0.09
  -4   7  -1    0.06    0.07
  -4   7  -1    0.05    0.06
  -4   7  -1    0.00    0.03
   4  -7   1    0.05    0.05
   4  -7   1    0.04    0.08
   4  -7   1    0.01    0.05
   4  -7   1   -0.03    0.08
   4  -7   1    0.11    0.06
  -5   7  -1    4.58    0.40
   5  -7   1    3.77    0.41
   5  -7   1    4.31    0.42
   5  -7   1    4.30    0.40
  -6   7  -1    0.49    0.11
  -6   7  -1    0.58    0.08
  -6   7  -1    0.39    0.07
   6  -7   1    0.27    0.11
   6  -7   1    0.46    0.09
   6  -7   1    0.42    0.08
   6  -7   1    0.59    0.10
  -7   7  -1   -0.01    0.08
  -7   7  -1   -0.02    0.07
  -7   7  -1    0.04    0.09
   7  -7   1    0.14    0.07
   7  -7   1    0.02    0.08
   7  -7   1    0.00    0.07
   7  -7   1    0.01    0.09
  -8   7  -1    0.07    0.07
  -8   7  -1    0.06    0.10
   8  -7   1   -0.10    0.08
   8  -7   1   -0.03    0.09
   8  -7   1   -0.12    0.10
  -9   7  -1    2.02    0.27
  -9   7  -1    2.03    0.24
   9  -7   1    2.63    0.29
   9  -7   1    2.40    0.30
   9  -7   1    2.25    0.26
 -10   7  -1   20.81    1.74
  10  -7   1   19.00    1.80
 -11   7  -1    0.15    0.10
 -11   7  -1    0.15    0.13
  11  -7   1    0.01    0.11
  11  -7   1   -0.01    0.12
  11  -7   1    0.03    0.20
 -12   7  -1    0.01    0.12
 -12   7  -1   -0.13    0.10
  12  -7   1    0.14    0.13
  12  -7   1    0.20    0.13
  13   6  -1   -0.27    0.20
  13   6  -1    0.14    0.16
 -13  -6   1   -0.05    0.12
  12   6  -1    0.18    0.18
  12   6  -1    0.29    0.14
 -12  -6   1    0.15    0.12
  11   6  -1    0.19    0.13
  11   6  -1    0.29    0.17
  11   6  -1    0.08    0.20
  10   6  -1    1.23    0.22
  10   6  -1    1.18    0.18
  10   6  -1    1.31    0.18
 -10  -6   1    1.09    0.26
 -10  -6   1    1.07    0.18
   9   6  -1   -0.03    0.14
   9   6  -1    0.00    0.10
   9   6  -1   -0.03    0.12
  -9  -6   1   -0.17    0.17
  -9  -6   1   -0.21    0.16
  -9  -6   1   -0.05    0.09
   8   6  -1    1.91    0.21
   8   6  -1    2.33    0.24
   8   6  -1    1.78    0.27
  -8  -6   1    1.53    0.23
  -8  -6   1    1.87    0.23
  -8  -6   1    1.76    0.28
   7   6  -1    1.66    0.23
   7   6  -1    1.81    0.21
   7   6  -1    1.43    0.20
   7   6  -1    1.33    0.17
  -7  -6   1    1.20    0.21
  -7  -6   1    1.92    0.20
  -7  -6   1    1.52    0.20
   6   6  -1    0.02    0.08
   6   6  -1    0.16    0.07
   6   6  -1    0.04    0.07
  -6  -6   1    0.07    0.06
  -6  -6   1    0.15    0.10
  -6  -6   1    0.13    0.10
   5   6  -1    1.13    0.19
   5   6  -1    1.50    0.17
   5   6  -1    1.30    0.15
  -5  -6   1    1.12    0.19
  -5  -6   1    1.46    0.17
  -5  -6   1    1.67    0.18
   4   6  -1    4.53    0.40
   4   6  -1    4.24    0.43
   4   6  -1    5.14    0.42
   4   6  -1    4.91    0.42
  -4  -6   1    4.81    0.41
   3   6  -1    0.14    0.05
   3   6  -1    0.10    0.06
   3   6  -1    0.11    0.06
  -3  -6   1    0.00    0.05
  -3  -6   1    0.07    0.06
  -3  -6   1    0.05    0.07
   2   6  -1    0.27    0.07
   2   6  -1    0.24    0.06
   2   6  -1    0.21    0.05
   2   6  -1    0.21    0.04
  -2  -6   1    0.28    0.06
  -2  -6   1    0.27    0.09
  -2  -6   1    0.22    0.06
  -2  -6   1    0.24    0.06
  -2  -6   1    0.34    0.05
  -1  -6   1    8.99    0.87
  -1  -6   1    8.93    0.81
  -1  -6   1    8.85    0.73
   0   6  -1    1.44    0.14
   0  -6   1    1.51    0.13
   0  -6   1    1.57    0.16
   0  -6   1    1.53    0.13
   0  -6   1    1.81    0.17
  -1   6  -1    1.06    0.09
  -1   6  -1    0.98    0.09
   1  -6   1    0.89    0.08
   1  -6   1    0.99    0.11
   1  -6   1    0.99    0.08
   1  -6   1    0.80    0.12
   2  -6   1   20.12    1.64
  -3   6  -1    0.19    0.04
  -3   6  -1    0.19    0.09
  -3   6  -1    0.20    0.05
   3  -6   1    0.19    0.04
   3  -6   1    0.32    0.09
   3  -6   1    0.16    0.07
   3  -6   1    0.27    0.06
   3  -6   1    0.27    0.04
   3  -6   1    0.05    0.06
  -4   6  -1    9.66    0.91
  -4   6  -1   10.51    0.84
  -4   6  -1    9.97    0.89
   4  -6   1   10.65    0.95
  -5   6  -1    0.17    0.04
  -5   6  -1    0.11    0.05
  -5   6  -1    0.12    0.09
  -5   6  -1    0.13    0.08
   5  -6   1    0.00    0.06
   5  -6   1    0.07    0.08
   5  -6   1    0.02    0.05
   5  -6   1    0.11    0.06
   5  -6   1    0.12    0.08
   5  -6   1    0.10    0.08
   5  -6   1    0.07    0.06
  -6   6  -1    4.12    0.37
  -6   6  -1    3.82    0.39
   6  -6   1    4.35    0.39
   6  -6   1    3.79    0.41
  -7   6  -1    3.88    0.36
   7  -6   1    4.10    0.40
   7  -6   1    3.80    0.43
   7  -6   1    4.56    0.40
  -8   6  -1    0.88    0.15
  -8   6  -1    0.79    0.14
  -8   6  -1    1.05    0.13
   8  -6   1    1.05    0.16
   8  -6   1    0.64    0.15
   8  -6   1    1.05    0.18
   8  -6   1    1.18    0.16
  -9   6  -1    0.18    0.09
  -9   6  -1    0.28    0.12
   9  -6   1    0.29    0.13
   9  -6   1    0.19    0.10
   9  -6   1    0.21    0.22
   9  -6   1    0.33    0.14
 -10   6  -1    2.95    0.31
 -10   6  -1    2.70    0.33
  10  -6   1    3.67    0.36
 -11   6  -1    2.48    0.31
 -11   6  -1    2.54    0.28
  11  -6   1    2.76    0.40
  11  -6   1    3.00    0.31
 -12   6  -1    2.16    0.28
 -12   6  -1    2.10    0.27
  12  -6   1    2.69    0.29
  12  -6   1    2.41    0.30
  13  -6   1    0.65    0.16
 -14   6  -1    2.26    0.29
  14  -6   1    2.02    0.32
  13   5  -1    1.72    0.26
  13   5  -1    2.09    0.27
 -13  -5   1    2.08    0.27
  12   5  -1    0.30    0.14
  12   5  -1    0.16    0.16
 -12  -5   1    0.18    0.12
  11   5  -1    0.52    0.19
 -11  -5   1    0.96    0.21
 -11  -5   1    0.78    0.15
  10   5  -1    3.25    0.41
  10   5  -1    3.32    0.39
  10   5  -1    3.81    0.38
 -10  -5   1    4.23    0.41
 -10  -5   1    3.63    0.39
   9   5  -1    3.41    0.38
   9   5  -1    3.87    0.41
  -9  -5   1    4.33    0.42
  -9  -5   1    4.51    0.41
  -9  -5   1    4.02    0.47
   8   5  -1    0.99    0.18
   8   5  -1    0.90    0.21
   8   5  -1    0.90    0.14
   8   5  -1    1.06    0.16
   8   5  -1    1.36    0.22
  -8  -5   1    0.98    0.16
  -8  -5   1    1.09    0.16
  -8  -5   1    1.00    0.19
   7   5  -1    2.56    0.30
   7   5  -1    2.38    0.25
   7   5  -1    2.75    0.28
   7   5  -1    2.65    0.30
   7   5  -1    2.66    0.27
  -7  -5   1    2.66    0.31
   6   5  -1    6.07    0.57
   6   5  -1    6.76    0.61
  -6  -5   1    6.57    0.57
   5   5  -1    0.11    0.10
   5   5  -1    0.18    0.13
   5   5  -1    0.13    0.05
   5   5  -1    0.17    0.06
  -5  -5   1    0.24    0.09
  -5  -5   1    0.15    0.09
  -5  -5   1    0.20    0.07
   4   5  -1    0.90    0.14
   4   5  -1    0.84    0.10
   4   5  -1    0.64    0.09
   4   5  -1    0.99    0.13
  -4  -5   1    0.74    0.10
  -4  -5   1    1.00    0.12
  -4  -5   1    0.88    0.14
  -4  -5   1    0.76    0.11
   3   5  -1    0.28    0.05
   3   5  -1    0.37    0.08
   3   5  -1    0.39    0.06
  -3  -5   1    0.57    0.09
  -3  -5   1    0.31    0.08
  -3  -5   1    0.39    0.07
  -3  -5   1    0.38    0.06
  -2  -5   1   55.67    5.29
  -1  -5   1   46.81    4.57
  -1  -5   1   46.88    3.98
  -1  -5   1   49.13    3.87
   0   5  -1  105.35    9.75
   0   5  -1  101.23    8.35
   0  -5   1  102.21    8.35
   1  -5   1   63.00    5.73
   2  -5   1    3.66    0.33
   2  -5   1    3.57    0.32
   2  -5   1    3.05    0.27
  -3   5  -1    0.23    0.04
  -3   5  -1    0.24    0.04
   3  -5   1    0.31    0.08
   3  -5   1    0.03    0.06
   3  -5   1    0.21    0.04
   3  -5   1    0.14    0.05
   3  -5   1    0.16    0.06
   3  -5   1    0.18    0.03
   3  -5   1    0.18    0.05
  -4   5  -1    1.97    0.22
  -4   5  -1    1.95    0.19
  -4   5  -1    2.31    0.20
   4  -5   1    2.37    0.19
   4  -5   1    2.08    0.23
  -5   5  -1    0.14    0.06
  -5   5  -1    0.28    0.05
  -5   5  -1    0.35    0.08
  -5   5  -1    0.27    0.09
   5  -5   1    0.32    0.07
   5  -5   1    0.30    0.07
   5  -5   1    0.18    0.07
   5  -5   1    0.30    0.07
   5  -5   1    0.33    0.08
   5  -5   1    0.43    0.07
  -6   5  -1    4.91    0.46
   6  -5   1    5.37    0.48
  -7   5  -1    3.20    0.37
  -7   5  -1    2.61    0.26
  -7   5  -1    2.69    0.28
   7  -5   1    2.78    0.28
  -8   5  -1    0.12    0.11
  -8   5  -1   -0.02    0.08
  -8   5  -1   -0.01    0.06
  -8   5  -1    0.10    0.17
   8  -5   1   -0.04    0.08
   8  -5   1   -0.21    0.10
   8  -5   1    0.06    0.11
  -9   5  -1    0.46    0.21
  -9   5  -1    0.58    0.13
  -9   5  -1    0.53    0.11
   9  -5   1    0.61    0.12
   9  -5   1    0.68    0.21
   9  -5   1    0.38    0.15
   9  -5   1    0.43    0.14
 -10   5  -1    0.32    0.13
 -10   5  -1    0.25    0.23
 -10   5  -1    0.30    0.12
  10  -5   1    0.66    0.18
  10  -5   1    0.28    0.11
  10  -5   1    0.38    0.20
 -11   5  -1    6.31    0.77
 -11   5  -1    7.69    0.69
  11  -5   1    7.20    0.69
 -12   5  -1    0.71    0.14
 -12   5  -1    0.44    0.15
  12  -5   1    0.41    0.13
  12  -5   1    0.41    0.14
  13  -5   1    0.23    0.12
  13  -5   1    0.11    0.14
 -14   5  -1    0.31    0.14
  14  -5   1    0.52    0.16
  14  -5   1    0.19    0.17
  13   4  -1    0.25    0.15
  13   4  -1    0.15    0.18
 -13  -4   1    0.26    0.13
  12   4  -1    1.11    0.19
  12   4  -1    0.82    0.18
 -12  -4   1    1.45    0.23
 -12  -4   1    1.09    0.18
  11   4  -1    0.87    0.18
  11   4  -1    1.15    0.19
 -11  -4   1    1.29    0.18
 -11  -4   1    0.88    0.19
  10   4  -1    1.56    0.21
  10   4  -1    1.34    0.22
 -10  -4   1    1.99    0.31
   9   4  -1    7.84    0.77
   9   4  -1    8.11    0.76
   9   4  -1    7.55    0.73
  -9  -4   1    9.05    0.84
  -9  -4   1    8.47    0.76
   8   4  -1   -0.27    0.16
   8   4  -1   -0.05    0.08
   8   4  -1   -0.04    0.09
   8   4  -1   -0.15    0.11
   8   4  -1    0.03    0.12
  -8  -4   1   -0.15    0.10
  -8  -4   1    0.06    0.09
   7   4  -1    0.01    0.08
   7   4  -1    0.04    0.08
   7   4  -1    0.12    0.10
   7   4  -1    0.04    0.06
   7   4  -1    0.17    0.10
  -7  -4   1    0.01    0.08
  -7  -4   1   -0.12    0.11
  -7  -4   1   -0.05    0.07
   6   4  -1    0.59    0.11
   6   4  -1    0.72    0.11
   6   4  -1    1.01    0.13
   6   4  -1    0.82    0.11
   6   4  -1    0.52    0.20
  -6  -4   1    0.85    0.11
  -6  -4   1    0.64    0.12
  -6  -4   1    0.86    0.13
   5   4  -1    2.52    0.28
   5   4  -1    2.17    0.26
   5   4  -1    2.31    0.23
  -5  -4   1    2.63    0.23
  -5  -4   1    2.80    0.25
   4   4  -1    0.59    0.07
   4   4  -1    0.60    0.09
  -4  -4   1    0.58    0.08
  -4  -4   1    0.85    0.09
  -4  -4   1    0.76    0.11
  -4  -4   1    0.71    0.10
   3   4  -1   14.50    1.35
  -3  -4   1   15.06    1.46
  -3  -4   1   16.06    1.24
  -2  -4   1   94.19    7.64
   1   4  -1   84.46    6.64
   1   4  -1   79.18    6.64
   0   4  -1    0.39    0.05
   0  -4   1    0.52    0.05
   0  -4   1    0.48    0.05
  -1   4  -1   12.13    0.99
   1  -4   1   11.73    0.99
   1  -4   1   12.71    0.99
  -2   4  -1   45.69    3.71
  -3   4  -1    1.01    0.11
  -3   4  -1    1.10    0.10
  -3   4  -1    1.07    0.10
   3  -4   1    1.08    0.13
   3  -4   1    1.02    0.14
   3  -4   1    0.90    0.12
   3  -4   1    0.80    0.13
   3  -4   1    1.12    0.12
  -4   4  -1    1.03    0.14
  -4   4  -1    1.03    0.10
   4  -4   1    1.15    0.13
   4  -4   1    0.97    0.13
   4  -4   1    0.96    0.11
  -5   4  -1    3.17    0.27
  -5   4  -1    2.99    0.26
   5  -4   1    2.60    0.26
  -6   4  -1    2.30    0.26
  -6   4  -1    2.18    0.19
  -6   4  -1    2.05    0.25
   6  -4   1    2.36    0.21
   6  -4   1    2.32    0.23
   6  -4   1    1.79    0.21
   6  -4   1    1.77    0.21
   6  -4   1    2.31    0.24
   6  -4   1    1.62    0.22
  -7   4  -1   -0.02    0.06
  -7   4  -1    0.08    0.08
  -7   4  -1    0.11    0.07
  -7   4  -1    0.07    0.13
   7  -4   1    0.13    0.09
   7  -4   1    0.05    0.09
   7  -4   1    0.01    0.06
   7  -4   1   -0.10    0.13
   7  -4   1   -0.07    0.07
  -8   4  -1    6.49    0.57
  -8   4  -1    5.45    0.53
  -8   4  -1    5.96    0.60
   8  -4   1    6.05    0.62
   8  -4   1    5.56    0.59
   8  -4   1    6.44    0.58
   8  -4   1    6.47    0.59
  -9   4  -1    0.23    0.11
  -9   4  -1    0.52    0.18
  -9   4  -1    0.19    0.08
   9  -4   1    0.27    0.14
   9  -4   1    0.18    0.19
   9  -4   1    0.17    0.15
   9  -4   1    0.08    0.09
 -10   4  -1    0.16    0.19
 -10   4  -1    0.04    0.12
 -10   4  -1    0.12    0.09
  10  -4   1    0.17    0.10
 -11   4  -1    0.44    0.12
 -11   4  -1    0.57    0.23
 -11   4  -1    0.63    0.15
  11  -4   1    0.79    0.15
 -12   4  -1    0.00    0.12
 -12   4  -1   -0.04    0.26
  12  -4   1   -0.29    0.12
  12  -4   1   -0.05    0.11
 -13   4  -1    0.50    0.32
  13  -4   1    0.54    0.14
  13  -4   1    0.47    0.17
 -14   4  -1   -0.04    0.14
  14  -4   1   -0.39    0.20
  14  -4   1    0.26    0.13
  14   3  -1    0.12    0.15
 -14  -3   1    0.10    0.15
  13   3  -1   -0.14    0.14
 -13  -3   1    0.19    0.14
  12   3  -1   -0.02    0.14
  12   3  -1    0.01    0.15
 -12  -3   1    0.20    0.16
 -12  -3   1    0.14    0.13
  11   3  -1    2.06    0.30
  11   3  -1    2.70    0.32
 -11  -3   1    2.62    0.32
  10   3  -1    0.63    0.15
  10   3  -1    0.55    0.14
  10   3  -1    0.33    0.18
 -10  -3   1    0.73    0.16
 -10  -3   1    0.60    0.15
   9   3  -1    0.82    0.21
   9   3  -1    1.10    0.17
   9   3  -1    0.96    0.14
   9   3  -1    1.02    0.16
  -9  -3   1    0.83    0.15
   8   3  -1    0.05    0.11
   8   3  -1   -0.16    0.07
   8   3  -1    0.02    0.07
   8   3  -1    0.09    0.09
   8   3  -1   -0.03    0.14
  -8  -3   1   -0.08    0.11
  -8  -3   1   -0.05    0.09
  -8  -3   1   -0.04    0.09
  -8  -3   1    0.32    0.16
   7   3  -1    0.11    0.07
   7   3  -1   -0.02    0.06
   7   3  -1   -0.01    0.07
   7   3  -1   -0.04    0.08
   7   3  -1    0.06    0.09
  -7  -3   1    0.07    0.06
  -7  -3   1    0.09    0.09
  -7  -3   1   -0.01    0.09
   6   3  -1    2.31    0.24
   6   3  -1    2.46    0.31
  -6  -3   1    2.44    0.24
   5   3  -1    0.08    0.07
   5   3  -1   -0.05    0.04
   5   3  -1    0.09    0.08
  -5  -3   1    0.06    0.07
  -5  -3   1    0.08    0.05
  -5  -3   1    0.05    0.05
  -5  -3   1   -0.01    0.07
   4   3  -1    3.40    0.33
  -4  -3   1    3.74    0.33
  -4  -3   1    3.23    0.36
  -4  -3   1    3.66    0.30
   3   3  -1    2.65    0.22
  -3  -3   1    2.67    0.22
  -3  -3   1    2.33    0.21
  -2  -3   1   69.53    5.52
  -2  -3   1   66.41    5.52
  -1  -3   1   13.20    1.08
   0  -3   1    7.44    0.61
  -1   3  -1    0.32    0.04
  -1   3  -1    0.35    0.04
   1  -3   1    0.35    0.04
  -2   3  -1    1.67    0.14
   2  -3   1    1.61    0.17
   3  -3   1   35.37    2.88
  -4   3  -1    0.35    0.08
  -4   3  -1    0.34    0.06
  -4   3  -1    0.44    0.09
  -4   3  -1    0.27    0.05
   4  -3   1    0.27    0.06
   4  -3   1    0.18    0.06
   4  -3   1    0.45    0.05
   4  -3   1    0.42    0.07
   4  -3   1    0.36    0.08
   5  -3   1    2.81    0.29
  -6   3  -1    2.07    0.18
  -6   3  -1    1.66    0.24
  -6   3  -1    1.83    0.19
   6  -3   1    1.72    0.21
   6  -3   1    2.12    0.19
   6  -3   1    1.68    0.22
   7  -3   1    3.78    0.37
  -8   3  -1    4.96    0.42
   8  -3   1    4.18    0.47
  -9   3  -1    0.00    0.19
  -9   3  -1    0.10    0.08
  -9   3  -1    0.11    0.09
  -9   3  -1    0.32    0.13
   9  -3   1    0.19    0.14
   9  -3   1    0.26    0.09
   9  -3   1    0.28    0.18
   9  -3   1    0.29    0.17
 -10   3  -1    0.08    0.09
 -10   3  -1    0.07    0.11
 -10   3  -1    0.13    0.16
  10  -3   1   -0.07    0.11
  10  -3   1    0.17    0.19
 -11   3  -1    6.35    0.57
 -11   3  -1    5.60    0.63
  11  -3   1    6.26    0.61
 -12   3  -1   -0.29    0.15
 -12   3  -1    0.17    0.12
 -12   3  -1    0.17    0.21
  12  -3   1    0.45    0.13
 -13   3  -1   -0.20    0.24
  13  -3   1    0.36    0.17
  13  -3   1    0.42    0.13
 -14   3  -1    1.09    0.32
 -14   3  -1    0.59    0.15
  14  -3   1    0.25    0.14
  14  -3   1   -0.03    0.26
  14   2  -1   -0.04    0.14
 -14  -2   1    0.06    0.15
  13   2  -1   -0.08    0.13
 -13  -2   1   -0.13    0.16
 -13  -2   1   -0.01    0.13
  12   2  -1    0.58    0.16
  12   2  -1    0.81    0.19
 -12  -2   1    0.70    0.16
 -12  -2   1    0.64    0.18
  11   2  -1    0.45    0.16
  11   2  -1    0.60    0.15
 -11  -2   1    0.58    0.15
 -11  -2   1    0.70    0.16
  10   2  -1    0.96    0.17
 -10  -2   1    0.57    0.18
 -10  -2   1    0.71    0.15
   9   2  -1   -0.03    0.12
   9   2  -1   -0.02    0.10
   9   2  -1   -0.15    0.09
  -9  -2   1    0.02    0.10
  -9  -2   1    0.10    0.10
   8   2  -1    5.61    0.52
   8   2  -1    5.31    0.48
   8   2  -1    4.88    0.50
  -8  -2   1    4.43    0.47
  -8  -2   1    4.95    0.47
   7   2  -1    0.04    0.09
   7   2  -1    0.15    0.07
   7   2  -1    0.05    0.08
   7   2  -1    0.06    0.07
   7   2  -1    0.10    0.07
  -7  -2   1    0.04    0.08
  -7  -2   1    0.09    0.07
  -7  -2   1    0.07    0.06
   6   2  -1    0.07    0.05
   6   2  -1    0.08    0.06
   6   2  -1    0.09    0.06
   6   2  -1   -0.05    0.06
   6   2  -1    0.06    0.06
   6   2  -1    0.11    0.13
  -6  -2   1    0.08    0.06
  -6  -2   1    0.03    0.05
  -6  -2   1    0.01    0.06
   5   2  -1    1.83    0.16
   5   2  -1    1.73    0.15
   5   2  -1    1.40    0.16
   5   2  -1    1.38    0.17
   5   2  -1    1.50    0.17
  -5  -2   1    1.26    0.17
  -5  -2   1    1.43    0.17
   4   2  -1   -0.03    0.06
   4   2  -1    0.03    0.03
   4   2  -1   -0.02    0.04
   4   2  -1    0.01    0.03
  -4  -2   1    0.01    0.03
  -4  -2   1    0.07    0.03
  -4  -2   1   -0.02    0.06
  -4  -2   1    0.13    0.06
   1   2  -1    1.06    0.09
  -1  -2   1    0.97    0.09
   0   2  -1    9.84    0.92
  -1   2  -1    9.66    0.80
  -1   2  -1   10.01    0.93
  -2   2  -1    0.09    0.03
   2  -2   1    0.04    0.04
   2  -2   1    0.06    0.03
  -3   2  -1   22.72    2.25
  -3   2  -1   23.70    1.93
   3  -2   1   24.58    1.93
  -4   2  -1    3.33    0.34
  -4   2  -1    3.32    0.29
   4  -2   1    3.63    0.32
   4  -2   1    3.41    0.34
  -5   2  -1    0.80    0.12
  -5   2  -1    0.40    0.06
   5  -2   1    0.77    0.11
   5  -2   1    0.66    0.10
   5  -2   1    0.58    0.08
   5  -2   1    0.47    0.10
   5  -2   1    0.57    0.07
  -6   2  -1    0.67    0.13
  -6   2  -1    0.43    0.12
  -6   2  -1    0.58    0.08
  -6   2  -1    0.69    0.10
  -6   2  -1    0.58    0.08
   6  -2   1    0.56    0.09
   6  -2   1    0.50    0.11
   7  -2   1    2.89    0.33
   7  -2   1    3.66    0.35
   7  -2   1    3.56    0.35
  -8   2  -1    4.58    0.45
  -8   2  -1    4.58    0.43
  -8   2  -1    4.40    0.43
  -8   2  -1    5.17    0.46
   8  -2   1    4.90    0.49
  -9   2  -1    1.65    0.23
  -9   2  -1    1.85    0.25
  -9   2  -1    1.72    0.26
   9  -2   1    1.80    0.26
   9  -2   1    1.81    0.24
   9  -2   1    1.71    0.23
 -10   2  -1    0.10    0.11
 -10   2  -1    0.14    0.09
 -10   2  -1    0.09    0.13
  10  -2   1   -0.03    0.15
  10  -2   1   -0.02    0.09
 -11   2  -1    0.65    0.15
 -11   2  -1    0.42    0.16
  11  -2   1    0.57    0.15
  11  -2   1    0.10    0.21
 -12   2  -1    1.57    0.26
 -12   2  -1    1.15    0.24
  12  -2   1    2.01    0.25
 -13   2  -1    1.40    0.20
 -13   2  -1    1.17    0.24
  13  -2   1    1.39    0.19
 -14   2  -1    0.27    0.16
 -14   2  -1    0.85    0.24
  14  -2   1    0.06    0.15
  14   1  -1    0.46    0.14
 -14  -1   1    0.25    0.17
 -14  -1   1    0.54    0.18
  13   1  -1    1.19    0.19
 -13  -1   1    1.33    0.20
  12   1  -1    5.87    0.59
  12   1  -1    6.27    0.61
 -12  -1   1    5.86    0.61
  11   1  -1    7.38    0.86
  11   1  -1    9.09    0.79
 -11  -1   1    8.02    0.77
  10   1  -1    9.48    0.81
  10   1  -1    8.52    0.81
 -10  -1   1    8.12    0.77
   9   1  -1    0.06    0.11
   9   1  -1   -0.07    0.07
  -9  -1   1    0.09    0.10
  -9  -1   1    0.06    0.10
  -9  -1   1    0.38    0.20
  -9  -1   1    0.04    0.09
   8   1  -1    0.43    0.10
   8   1  -1    0.54    0.11
   8   1  -1    0.43    0.11
   8   1  -1    0.52    0.11
   8   1  -1    0.29    0.14
  -8  -1   1    0.46    0.10
  -8  -1   1    0.40    0.10
   7   1  -1    1.22    0.14
   7   1  -1    1.24    0.15
   7   1  -1    0.91    0.14
  -7  -1   1    1.23    0.15
  -7  -1   1    1.12    0.14
  -7  -1   1    1.15    0.17
  -7  -1   1    1.35    0.14
   6   1  -1   10.07    0.93
  -6  -1   1   10.52    0.86
  -6  -1   1   10.63    0.95
   5   1  -1    0.46    0.07
   5   1  -1    0.55    0.09
   5   1  -1    0.27    0.06
   5   1  -1    0.52    0.07
   5   1  -1    0.48    0.07
  -5  -1   1    0.32    0.06
  -5  -1   1    0.32    0.08
  -5  -1   1    0.47    0.08
  -5  -1   1    0.46    0.07
   4   1  -1    0.71    0.08
   4   1  -1    0.86    0.08
   4   1  -1    0.64    0.09
  -4  -1   1    0.72    0.10
  -4  -1   1    0.99    0.11
  -4  -1   1    0.77    0.08
  -4  -1   1    0.57    0.08
   2   1  -1    3.90    0.33
  -2  -1   1    3.84    0.33
  -2  -1   1    4.31    0.33
   1   1  -1    3.74    0.32
   1   1  -1    4.03    0.32
   0   1  -1    3.96    0.32
   0  -1   1    3.92    0.32
  -2   1  -1   12.40    1.07
   2  -1   1   13.83    1.07
  -3   1  -1    0.34    0.05
  -3   1  -1    0.52    0.07
   3  -1   1    0.43    0.06
  -4   1  -1    0.06    0.03
  -4   1  -1    0.10    0.05
  -4   1  -1    0.04    0.04
   4  -1   1    0.02    0.03
   4  -1   1    0.12    0.06
   4  -1   1    0.03    0.03
   4  -1   1    0.04    0.03
   4  -1   1    0.08    0.07
  -5   1  -1    0.32    0.08
  -5   1  -1    0.39    0.06
  -5   1  -1    0.41    0.07
   5  -1   1    0.44    0.08
   5  -1   1    0.41    0.07
   5  -1   1    0.35    0.08
   5  -1   1    0.26    0.06
  -6   1  -1    0.34    0.08
  -6   1  -1    0.46    0.07
  -6   1  -1    0.42    0.07
  -6   1  -1    0.45    0.12
   6  -1   1    0.38    0.07
   6  -1   1    0.52    0.10
   6  -1   1    0.31    0.09
   6  -1   1    0.43    0.09
   6  -1   1    0.33    0.12
  -7   1  -1    4.15    0.39
  -7   1  -1    3.85    0.36
  -7   1  -1    3.80    0.34
   7  -1   1    3.98    0.38
   7  -1   1    3.61    0.36
   7  -1   1    4.21    0.38
   7  -1   1    3.82    0.39
  -8   1  -1    0.15    0.08
  -8   1  -1    0.08    0.09
  -8   1  -1    0.14    0.07
  -8   1  -1    0.11    0.11
   8  -1   1    0.03    0.09
   8  -1   1    0.15    0.09
   8  -1   1    0.28    0.10
   8  -1   1    0.05    0.13
  -9   1  -1    1.00    0.19
  -9   1  -1    1.34    0.19
  -9   1  -1    1.52    0.26
   9  -1   1    1.16    0.17
   9  -1   1    1.59    0.21
 -10   1  -1    3.27    0.31
 -10   1  -1    2.80    0.31
  10  -1   1    2.58    0.33
  10  -1   1    2.25    0.31
 -11   1  -1    5.89    0.52
 -11   1  -1    5.19    0.55
  11  -1   1    4.76    0.54
 -12   1  -1    0.11    0.17
  12  -1   1   -0.32    0.21
  12  -1   1   -0.03    0.12
 -13   1  -1    0.73    0.20
 -13   1  -1    1.09    0.18
  13  -1   1    0.79    0.17
 -14   1  -1    0.94    0.20
  14  -1   1    1.00    0.18
  14   0  -1    0.41    0.14
 -14   0   1    0.24    0.20
 -14   0   1    0.45    0.16
  13   0  -1    0.29    0.13
 -13   0   1    0.61    0.18
 -13   0   1    0.35    0.15
  12   0  -1    1.87    0.30
  12   0  -1    2.57    0.28
  12   0  -1    2.44    0.30
 -12   0   1    1.45    0.24
 -12   0   1    1.96    0.29
  11   0  -1    1.84    0.28
  11   0  -1    1.88    0.26
 -11   0   1    1.63    0.25
 -11   0   1    1.81    0.26
  10   0  -1    1.66    0.25
  10   0  -1    2.05    0.29
 -10   0   1    2.52    0.25
 -10   0   1    1.98    0.29
   9   0  -1    0.14    0.10
   9   0  -1    0.19    0.11
  -9   0   1    0.40    0.16
  -9   0   1    0.07    0.12
  -9   0   1    0.09    0.09
   8   0  -1    6.96    0.62
  -8   0   1    6.85    0.62
  -8   0   1    6.30    0.64
   7   0  -1    1.84    0.21
   7   0  -1    1.71    0.23
   7   0  -1    2.15    0.24
   7   0  -1    1.98    0.23
  -7   0   1    2.20    0.23
  -7   0   1    2.27    0.21
  -7   0   1    2.44    0.23
  -7   0   1    2.33    0.21
   6   0  -1    0.06    0.08
   6   0  -1    0.05    0.06
   6   0  -1    0.07    0.05
   6   0  -1    0.07    0.08
   6   0  -1    0.15    0.05
  -6   0   1    0.12    0.08
  -6   0   1    0.08    0.08
  -6   0   1   -0.03    0.05
  -6   0   1    0.11    0.05
   5   0  -1    1.22    0.16
   5   0  -1    1.40    0.14
   5   0  -1    1.26    0.13
  -5   0   1    1.33    0.16
  -5   0   1    1.39    0.13
  -5   0   1    1.46    0.15
  -4   0   1    2.89    0.24
  -4   0   1    2.84    0.26
   3   0  -1    2.63    0.23
  -2   0   1    9.21    0.75
   1   0  -1    7.18    0.61
  -1   0   1    7.76    0.61
   0   0  -1    0.23    0.02
   0   0   1    0.23    0.02
   1   0   1    4.31    0.41
   2   0   1   65.28    6.15
   2   0   1   67.61    5.26
   2   0   1   61.61    5.26
  -3   0  -1   48.75    4.20
  -3   0  -1   53.89    4.20
   3   0   1   52.43    4.20
  -4   0  -1   16.33    1.35
   4   0   1   15.67    1.43
   4   0   1   16.83    1.35
   4   0   1   17.44    1.46
  -5   0  -1    0.27    0.06
  -5   0  -1    0.30    0.06
  -5   0  -1    0.24    0.07
  -5   0  -1    0.41    0.09
   5   0   1    0.46    0.07
   5   0   1    0.19    0.07
   5   0   1    0.38    0.06
   5   0   1    0.23    0.06
   5   0   1    0.28    0.08
   5   0   1    0.39    0.07
  -6   0  -1    3.05    0.36
  -6   0  -1    3.20    0.31
  -6   0  -1    3.84    0.34
   6   0   1    3.55    0.35
   6   0   1    4.04    0.32
  -7   0  -1    1.37    0.19
  -7   0  -1    1.94    0.19
  -7   0  -1    2.04    0.20
   7   0   1    2.00    0.21
   7   0   1    1.39    0.19
   7   0   1    1.64    0.20
  -8   0  -1    1.40    0.20
  -8   0  -1    1.62    0.19
  -8   0  -1    1.85    0.21
  -8   0  -1    1.25    0.19
   8   0   1    1.80    0.22
   8   0   1    1.49    0.21
   8   0   1    1.83    0.21
   8   0   1    1.51    0.20
  -9   0  -1    1.29    0.18
  -9   0  -1    1.30    0.18
   9   0   1    1.15    0.17
   9   0   1    0.97    0.16
 -10   0  -1   -0.05    0.10
 -10   0  -1    0.13    0.13
 -10   0  -1    0.16    0.12
  10   0   1   -0.02    0.12
  10   0   1    0.07    0.12
 -11   0  -1   -0.01    0.15
  11   0   1    0.04    0.15
  11   0   1    0.16    0.12
 -12   0  -1    2.22    0.27
 -12   0  -1    2.10    0.31
  12   0   1    2.26    0.30
  12   0   1    1.86    0.26
  12   0   1    1.66    0.27
 -13   0  -1    0.38    0.16
 -13   0  -1   -0.44    0.15
  13   0   1    0.01    0.13
 -14   0  -1    0.35    0.20
 -14   0  -1    0.50    0.17
  14   0   1    0.05    0.14
 -14   1   1    0.26    0.15
 -14   1   1    0.49    0.24
  13  -1  -1    1.56    0.22
  13  -1  -1    0.91    0.27
 -13   1   1    1.28    0.26
 -13   1   1    1.24    0.20
  12  -1  -1    1.20    0.21
 -12   1   1    1.09    0.18
 -12   1   1    1.06    0.18
  11  -1  -1    7.35    0.70
  10  -1  -1    0.06    0.10
  10  -1  -1    0.31    0.23
  10  -1  -1   -0.06    0.16
 -10   1   1    0.04    0.13
 -10   1   1    0.13    0.10
   9  -1  -1    0.09    0.13
   9  -1  -1    0.10    0.09
  -9   1   1    0.01    0.09
  -9   1   1    0.01    0.15
  -9   1   1    0.28    0.13
  -9   1   1    0.20    0.08
   8  -1  -1    3.23    0.31
   8  -1  -1    2.82    0.35
  -8   1   1    2.85    0.28
   7  -1  -1    0.06    0.06
   7  -1  -1    0.10    0.07
   7  -1  -1    0.15    0.08
   7  -1  -1   -0.01    0.07
   7  -1  -1    0.15    0.12
  -7   1   1    0.02    0.05
  -7   1   1   -0.03    0.07
  -7   1   1    0.27    0.17
  -7   1   1    0.05    0.06
  -7   1   1    0.04    0.09
   6  -1  -1    9.20    0.81
   6  -1  -1    9.14    0.84
   6  -1  -1    8.01    0.78
  -6   1   1    9.00    0.78
  -6   1   1    8.03    0.72
   5  -1  -1   -0.04    0.07
   5  -1  -1    0.06    0.04
   5  -1  -1    0.08    0.05
   5  -1  -1    0.00    0.04
   5  -1  -1    0.05    0.04
  -5   1   1   -0.01    0.03
  -5   1   1    0.18    0.06
  -5   1   1   -0.04    0.04
   4  -1  -1    0.03    0.04
   4  -1  -1    0.02    0.05
   4  -1  -1    0.01    0.03
   4  -1  -1    0.02    0.02
  -4   1   1    0.00    0.02
  -4   1   1   -0.04    0.03
  -3   1   1   14.44    1.18
   2  -1  -1   18.20    1.48
   1  -1  -1    3.93    0.32
   1  -1  -1    3.83    0.32
  -1   1   1    3.86    0.32
   0  -1  -1   50.28    4.10
   0  -1  -1   48.30    4.10
   0   1   1   49.27    4.79
   0   1   1   52.40    4.10
   0   1   1   52.34    4.10
  -1  -1  -1    2.29    0.24
  -1  -1  -1    2.23    0.24
   1   1   1    1.95    0.24
   1   1   1    2.05    0.24
  -2  -1  -1    3.48    0.29
   2   1   1    3.49    0.29
  -4  -1  -1    0.53    0.09
  -4  -1  -1    0.60    0.09
  -4  -1  -1    0.60    0.07
   4   1   1    0.60    0.09
   4   1   1    0.38    0.06
   4   1   1    0.51    0.07
   4   1   1    0.49    0.07
   4   1   1    0.38    0.06
   5   1   1   24.87    2.29
   5   1   1   23.42    1.97
   5   1   1   24.01    2.09
   6   1   1    9.77    0.89
   6   1   1    9.01    0.81
   6   1   1    8.75    0.83
  -7  -1  -1    3.75    0.36
  -7  -1  -1    3.69    0.33
   7   1   1    3.39    0.35
   7   1   1    3.72    0.34
  -8  -1  -1    0.36    0.10
  -8  -1  -1    0.18    0.14
  -8  -1  -1    0.38    0.09
   8   1   1    0.37    0.12
   8   1   1    0.33    0.10
   8   1   1    0.18    0.15
   8   1   1    0.45    0.10
   8   1   1    0.26    0.09
  -9  -1  -1    0.56    0.12
  -9  -1  -1    0.13    0.13
   9   1   1    0.29    0.10
   9   1   1    0.31    0.11
   9   1   1    0.43    0.13
 -10  -1  -1    0.14    0.12
  10   1   1    0.36    0.13
  10   1   1   -0.03    0.13
 -11  -1  -1    1.51    0.22
 -11  -1  -1    1.40    0.21
  11   1   1    1.48    0.22
 -12  -1  -1    0.90    0.18
 -12  -1  -1    0.70    0.18
  12   1   1    0.72    0.19
  12   1   1    0.66    0.16
 -13  -1  -1   -0.26    0.15
  13   1   1   -0.01    0.22
  13   1   1    0.20    0.13
 -14  -1  -1    0.83    0.19
  14   1   1    0.96    0.18
  14  -2  -1    0.68    0.14
 -14   2   1    0.34    0.31
 -14   2   1    0.35    0.14
  13  -2  -1    0.14    0.12
  13  -2  -1    0.09    0.17
 -13   2   1   -0.10    0.12
 -13   2   1   -0.49    0.23
 -13   2   1    0.06    0.18
  12  -2  -1    1.23    0.21
  12  -2  -1    1.10    0.18
 -12   2   1    1.35    0.19
 -12   2   1    0.83    0.26
  11  -2  -1    2.69    0.32
  11  -2  -1    2.45    0.31
 -11   2   1    2.50    0.29
  10  -2  -1    1.16    0.19
  10  -2  -1    1.57    0.29
  10  -2  -1    1.36    0.25
 -10   2   1    1.68    0.19
 -10   2   1    1.18    0.23
 -10   2   1    1.40    0.20
   9  -2  -1    0.24    0.16
   9  -2  -1    0.43    0.11
   9  -2  -1    0.27    0.16
   9  -2  -1    0.44    0.15
  -9   2   1    0.30    0.10
  -9   2   1    0.20    0.08
  -9   2   1    0.31    0.14
  -9   2   1    0.47    0.14
   8  -2  -1    4.59    0.42
   8  -2  -1    3.75    0.40
   8  -2  -1    4.47    0.41
  -8   2   1    3.46    0.37
   7  -2  -1    0.52    0.10
   7  -2  -1    0.38    0.08
   7  -2  -1    0.52    0.12
  -7   2   1    0.37    0.07
  -7   2   1    0.45    0.19
   6  -2  -1    0.30    0.07
   6  -2  -1    0.29    0.09
   6  -2  -1    0.37    0.10
   6  -2  -1    0.35    0.07
  -6   2   1    0.23    0.09
  -6   2   1    0.30    0.07
  -6   2   1    0.17    0.05
  -6   2   1    0.26    0.09
  -6   2   1    0.18    0.06
   5  -2  -1    0.24    0.08
   5  -2  -1    0.30    0.05
   5  -2  -1    0.22    0.06
   5  -2  -1    0.20    0.06
  -5   2   1    0.37    0.06
  -5   2   1    0.21    0.04
  -5   2   1    0.23    0.06
   3  -2  -1   17.09    1.45
  -3   2   1   18.58    1.45
  -3   2   1   17.73    1.45
   2  -2  -1    1.10    0.09
  -2   2   1    0.99    0.09
  -2   2   1    1.00    0.09
   1  -2  -1    2.37    0.22
  -1   2   1    2.12    0.18
   0  -2  -1   24.11    2.43
   0   2   1   26.58    2.08
   0   2   1   26.06    2.08
  -1  -2  -1    0.06    0.02
  -1  -2  -1    0.08    0.02
   1   2   1    0.12    0.02
   1   2   1    0.08    0.02
  -3  -2  -1  212.92   18.32
   3   2   1  231.16   18.32
   3   2   1  232.89   18.32
  -4  -2  -1   18.05    1.73
  -5  -2  -1   26.16    2.40
   5   2   1   25.73    2.06
   5   2   1   23.49    2.26
  -6  -2  -1    7.93    0.73
  -6  -2  -1    7.67    0.70
  -6  -2  -1    8.20    0.70
   6   2   1    7.43    0.70
   6   2   1    7.94    0.66
   6   2   1    7.86    0.70
  -7  -2  -1   -0.14    0.07
  -7  -2  -1    0.06    0.08
  -7  -2  -1   -0.06    0.10
  -7  -2  -1   -0.17    0.08
   7   2   1    0.01    0.07
   7   2   1   -0.07    0.09
   7   2   1   -0.11    0.06
   7   2   1    0.03    0.07
   7   2   1    0.04    0.08
  -8  -2  -1    0.98    0.15
   8   2   1    1.14    0.19
   8   2   1    0.93    0.15
   8   2   1    0.69    0.12
   8   2   1    0.95    0.18
   8   2   1    0.67    0.13
  -9  -2  -1    0.23    0.11
   9   2   1    0.39    0.13
   9   2   1    0.29    0.11
   9   2   1   -0.01    0.11
 -10  -2  -1   -0.16    0.13
 -10  -2  -1    0.08    0.10
  10   2   1   -0.05    0.13
  10   2   1    0.22    0.16
  10   2   1    0.04    0.13
 -11  -2  -1    0.12    0.15
 -11  -2  -1   -0.03    0.13
  11   2   1   -0.19    0.13
  11   2   1    0.05    0.12
 -12  -2  -1    0.36    0.18
 -12  -2  -1    0.40    0.15
  12   2   1    0.15    0.16
  12   2   1    0.36    0.15
 -13  -2  -1   -0.12    0.22
  13   2   1    0.00    0.14
  13   2   1    0.05    0.21
 -14  -2  -1    1.75    0.25
  14   2   1    1.33    0.22
  14  -3  -1    0.12    0.12
  14  -3  -1   -0.47    0.22
 -14   3   1    0.03    0.13
  13  -3  -1   -0.17    0.15
  13  -3  -1    0.08    0.12
 -13   3   1    0.23    0.13
 -13   3   1   -0.37    0.29
 -13   3   1   -0.04    0.14
  12  -3  -1    0.40    0.16
  12  -3  -1    0.20    0.12
 -12   3   1    0.35    0.26
  11  -3  -1    0.19    0.11
  11  -3  -1    0.06    0.13
 -11   3   1    0.13    0.11
 -11   3   1   -0.31    0.25
 -11   3   1    0.10    0.12
  10  -3  -1   43.87    4.00
 -10   3   1   45.26    3.85
   9  -3  -1    1.01    0.18
   9  -3  -1    1.11    0.15
   9  -3  -1    0.74    0.18
  -9   3   1    1.12    0.21
  -9   3   1    1.19    0.17
  -9   3   1    0.74    0.14
  -9   3   1    1.24    0.14
   8  -3  -1    4.75    0.48
  -8   3   1    5.05    0.46
   7  -3  -1    0.95    0.18
   7  -3  -1    1.31    0.17
  -7   3   1    1.34    0.14
  -7   3   1    1.47    0.20
  -7   3   1    1.33    0.16
  -7   3   1    1.02    0.13
   6  -3  -1    6.43    0.61
   6  -3  -1    6.44    0.62
   6  -3  -1    6.81    0.61
  -6   3   1    6.59    0.54
  -6   3   1    5.67    0.63
  -6   3   1    6.42    0.57
  -6   3   1    6.54    0.59
   5  -3  -1   10.46    1.00
  -5   3   1   10.78    0.90
  -5   3   1   11.56    0.95
   4  -3  -1    1.37    0.14
   4  -3  -1    1.08    0.10
   4  -3  -1    1.09    0.11
   4  -3  -1    0.87    0.13
   4  -3  -1    1.24    0.13
   4  -3  -1    1.20    0.13
  -4   3   1    1.24    0.10
  -4   3   1    0.91    0.11
   3  -3  -1    3.53    0.35
   3  -3  -1    3.59    0.30
  -3   3   1    3.77    0.36
   2  -3  -1    2.02    0.17
   2  -3  -1    2.01    0.17
  -2   3   1    1.91    0.20
  -1   3   1   78.77    6.41
  -1   3   1   79.17    6.41
   0   3   1   25.65    2.07
   0   3   1   25.34    2.07
   1   3   1  784.31   62.47
   1   3   1  755.83   72.94
  -2  -3  -1   31.20    2.54
  -3  -3  -1    5.94    0.56
  -3  -3  -1    5.97    0.47
   3   3   1    5.33    0.47
   3   3   1    5.40    0.50
  -4  -3  -1    1.48    0.14
  -4  -3  -1    1.14    0.17
  -4  -3  -1    1.64    0.17
  -4  -3  -1    1.64    0.14
   4   3   1    1.23    0.16
   4   3   1    1.54    0.14
   4   3   1    1.77    0.16
   4   3   1    1.38    0.15
  -5  -3  -1   10.08    0.86
  -5  -3  -1    9.92    0.98
  -6  -3  -1    2.81    0.28
  -6  -3  -1    2.67    0.28
  -6  -3  -1    2.65    0.28
  -6  -3  -1    2.79    0.32
  -6  -3  -1    2.58    0.27
   6   3   1    2.71    0.30
   6   3   1    2.72    0.28
   6   3   1    2.73    0.37
   6   3   1    3.13    0.27
  -7  -3  -1   -0.32    0.12
  -7  -3  -1    0.07    0.06
   7   3   1    0.09    0.09
   7   3   1    0.03    0.07
   7   3   1   -0.05    0.06
   7   3   1   -0.02    0.08
   7   3   1    0.04    0.10
  -8  -3  -1    1.77    0.20
   8   3   1    1.67    0.23
   8   3   1    1.53    0.20
   8   3   1    1.21    0.19
   8   3   1    1.33    0.18
  -9  -3  -1    2.51    0.28
  -9  -3  -1    2.14    0.27
   9   3   1    1.90    0.28
   9   3   1    2.52    0.25
   9   3   1    2.08    0.26
 -10  -3  -1    0.35    0.13
  10   3   1    0.25    0.13
 -11  -3  -1   -0.22    0.20
 -11  -3  -1    0.18    0.17
 -11  -3  -1   -0.22    0.11
  11   3   1    0.11    0.15
  11   3   1   -0.01    0.14
 -12  -3  -1    3.33    0.36
  12   3   1    2.66    0.36
  12   3   1    3.12    0.36
  13   3   1   -0.01    0.18
  13   3   1    0.08    0.15
  14  -4  -1    0.85    0.17
 -14   4   1    0.89    0.17
  13  -4  -1    0.05    0.15
  13  -4  -1   -0.02    0.12
 -13   4   1   -0.03    0.12
  12  -4  -1    1.20    0.19
  12  -4  -1    0.92    0.16
 -12   4   1    0.87    0.17
  11  -4  -1    2.52    0.32
  11  -4  -1    2.52    0.30
 -11   4   1    2.85    0.29
  10  -4  -1    1.87    0.24
  10  -4  -1    1.67    0.33
  10  -4  -1    2.43    0.30
 -10   4   1    1.81    0.21
 -10   4   1    1.44    0.23
   9  -4  -1    0.35    0.14
   9  -4  -1    0.31    0.16
   9  -4  -1    0.34    0.10
   9  -4  -1    0.30    0.12
  -9   4   1    0.36    0.11
  -9   4   1    0.30    0.08
  -9   4   1    0.43    0.22
   8  -4  -1    9.76    0.97
  -8   4   1   10.69    0.94
  -8   4   1   10.75    0.92
   7  -4  -1    3.60    0.35
   6  -4  -1    1.57    0.20
  -6   4   1    1.61    0.21
  -6   4   1    1.91    0.18
  -6   4   1    1.83    0.20
   5  -4  -1    5.61    0.52
  -5   4   1    5.39    0.50
   4  -4  -1    1.03    0.10
   4  -4  -1    1.22    0.10
   4  -4  -1    0.99    0.13
   4  -4  -1    1.22    0.14
   4  -4  -1    1.00    0.15
  -4   4   1    0.98    0.11
   3  -4  -1    0.48    0.04
   3  -4  -1    0.43    0.05
   3  -4  -1    0.56    0.08
   3  -4  -1    0.36    0.07
   3  -4  -1    0.39    0.08
  -3   4   1    0.54    0.05
   2  -4  -1   20.84    2.10
  -2   4   1   21.48    2.10
  -2   4   1   22.52    1.79
  -2   4   1   23.22    1.79
  -1   4   1   12.45    1.01
   0   4   1    1.19    0.11
   0   4   1    1.34    0.11
  -1  -4  -1    9.01    0.73
  -1  -4  -1    8.99    0.73
   1   4   1    8.56    0.86
   1   4   1    9.18    0.73
  -2  -4  -1    2.65    0.31
  -2  -4  -1    3.20    0.27
  -2  -4  -1    2.77    0.31
  -2  -4  -1    2.95    0.25
  -2  -4  -1    2.85    0.25
   2   4   1    3.07    0.25
   2   4   1    3.27    0.25
  -3  -4  -1    5.75    0.51
  -3  -4  -1    6.31    0.58
  -3  -4  -1    6.03    0.59
  -3  -4  -1    5.57    0.54
   3   4   1    5.33    0.53
   3   4   1    6.21    0.49
  -4  -4  -1    0.16    0.09
  -4  -4  -1    0.34    0.08
  -4  -4  -1    0.07    0.06
  -4  -4  -1    0.34    0.08
   4   4   1    0.06    0.07
   4   4   1    0.22    0.07
   4   4   1    0.20    0.06
   4   4   1    0.10    0.04
  -5  -4  -1    0.53    0.09
  -5  -4  -1    0.43    0.09
  -5  -4  -1    0.56    0.11
  -5  -4  -1    0.25    0.10
  -5  -4  -1    0.73    0.11
   5   4   1    0.89    0.14
   5   4   1    0.49    0.07
   5   4   1    0.44    0.08
   5   4   1    0.35    0.12
  -6  -4  -1    0.14    0.10
  -6  -4  -1   -0.07    0.09
  -6  -4  -1    0.25    0.08
  -6  -4  -1    0.15    0.09
  -6  -4  -1   -0.01    0.12
   6   4   1    0.15    0.08
   6   4   1    0.08    0.06
   6   4   1    0.25    0.07
   6   4   1    0.23    0.11
   6   4   1    0.23    0.07
  -7  -4  -1    4.96    0.44
   7   4   1    4.18    0.43
   7   4   1    4.76    0.46
   7   4   1    4.29    0.42
  -8  -4  -1    2.37    0.32
  -8  -4  -1    3.04    0.31
   8   4   1    2.97    0.32
   8   4   1    2.75    0.33
   8   4   1    3.29    0.30
   8   4   1    3.08    0.34
  -9  -4  -1    0.53    0.14
  -9  -4  -1    0.76    0.18
   9   4   1    0.59    0.13
   9   4   1    0.64    0.13
   9   4   1    0.60    0.15
 -10  -4  -1    0.73    0.20
 -10  -4  -1    0.73    0.19
 -10  -4  -1    0.47    0.15
  10   4   1    0.28    0.14
  10   4   1    0.85    0.18
  10   4   1    0.47    0.15
 -11  -4  -1    0.42    0.13
 -11  -4  -1    0.20    0.22
 -11  -4  -1    0.38    0.24
  11   4   1    0.34    0.15
  11   4   1    0.51    0.17
 -12  -4  -1    0.33    0.13
  12   4   1   -0.07    0.16
  12   4   1   -0.06    0.13
 -13  -4  -1    0.70    0.15
  13   4   1    0.58    0.18
  13   4   1    0.37    0.18
 -14   5   1    0.25    0.14
 -14   5   1    0.07    0.20
  13  -5  -1    0.12    0.12
  13  -5  -1    0.24    0.13
 -13   5   1    0.02    0.12
  12  -5  -1    0.69    0.14
  12  -5  -1    0.71    0.17
 -12   5   1    0.69    0.15
 -12   5   1    0.55    0.13
  11  -5  -1    0.66    0.15
  11  -5  -1    0.54    0.13
  11  -5  -1    0.72    0.20
 -11   5   1    0.33    0.13
 -11   5   1    0.50    0.11
  10  -5  -1    8.95    0.81
  10  -5  -1    8.89    0.84
  10  -5  -1    7.60    0.95
  10  -5  -1    8.72    0.86
   9  -5  -1    3.14    0.32
  -9   5   1    2.98    0.32
   8  -5  -1    0.89    0.16
   8  -5  -1    0.79    0.13
   8  -5  -1    1.24    0.16
  -8   5   1    1.06    0.13
  -8   5   1    0.87    0.12
  -8   5   1    0.87    0.14
   7  -5  -1    0.96    0.15
   7  -5  -1    1.17    0.15
   7  -5  -1    1.21    0.16
   7  -5  -1    0.75    0.12
   7  -5  -1    1.05    0.15
  -7   5   1    0.87    0.12
  -7   5   1    0.80    0.12
   6  -5  -1    3.03    0.30
   6  -5  -1    3.23    0.32
   6  -5  -1    3.02    0.30
  -6   5   1    2.99    0.31
   5  -5  -1   16.25    1.49
  -5   5   1   17.24    1.42
  -5   5   1   16.47    1.34
  -5   5   1   15.61    1.34
  -4   5   1   14.43    1.18
   3  -5  -1    2.02    0.19
  -3   5   1    1.56    0.15
  -3   5   1    1.85    0.15
   2  -5  -1   10.94    1.00
   1  -5  -1    5.03    0.47
   1  -5  -1    5.86    0.54
   1  -5  -1    5.33    0.51
  -1   5   1    5.46    0.44
   0  -5  -1   20.38    1.87
   0  -5  -1   18.83    1.89
  -1  -5  -1   16.05    1.31
  -1  -5  -1   16.28    1.36
  -2  -5  -1    7.49    0.60
  -2  -5  -1    7.20    0.60
   2   5   1    7.14    0.60
   2   5   1    7.21    0.71
  -3  -5  -1    6.02    0.52
  -3  -5  -1    6.13    0.50
   3   5   1    5.89    0.53
  -4  -5  -1    6.10    0.57
  -4  -5  -1    5.81    0.50
   4   5   1    6.06    0.48
   4   5   1    5.25    0.52
   4   5   1    5.28    0.50
  -5  -5  -1   -0.09    0.08
  -5  -5  -1    0.18    0.12
  -5  -5  -1    0.15    0.06
  -5  -5  -1    0.00    0.08
  -5  -5  -1    0.02    0.09
   5   5   1    0.19    0.06
   5   5   1    0.02    0.15
   5   5   1    0.05    0.07
  -6  -5  -1   13.72    1.13
   6   5   1   12.84    1.16
   6   5   1   13.77    1.23
   6   5   1   12.88    1.18
  -7  -5  -1    3.29    0.34
  -7  -5  -1    3.60    0.34
   7   5   1    3.24    0.32
   7   5   1    3.32    0.33
   7   5   1    2.88    0.34
  -8  -5  -1    0.09    0.11
  -8  -5  -1   -0.14    0.16
  -8  -5  -1    0.08    0.10
   8   5   1    0.19    0.08
   8   5   1    0.12    0.09
   8   5   1   -0.09    0.15
  -9  -5  -1    0.15    0.14
  -9  -5  -1   -0.28    0.20
   9   5   1    0.06    0.16
   9   5   1   -0.09    0.11
   9   5   1   -0.02    0.10
 -10  -5  -1   -0.08    0.11
 -10  -5  -1   -0.08    0.17
  10   5   1    0.08    0.12
  10   5   1   -0.08    0.16
  10   5   1    0.08    0.12
 -11  -5  -1    0.88    0.24
 -11  -5  -1    0.62    0.14
  11   5   1    0.15    0.14
  11   5   1    0.30    0.18
  11   5   1    0.37    0.20
 -12  -5  -1    0.03    0.12
  12   5   1    0.24    0.14
  12   5   1    0.17    0.20
 -13  -5  -1    0.06    0.12
  13   5   1    0.00    0.21
  13   5   1    0.33    0.17
  14  -6  -1   -0.33    0.15
 -14   6   1   -0.20    0.16
 -14   6   1    0.26    0.14
  13  -6  -1    0.69    0.27
  13  -6  -1    0.69    0.16
  12  -6  -1    0.48    0.14
  12  -6  -1    0.17    0.13
 -12   6   1    0.27    0.11
 -12   6   1    0.20    0.13
  11  -6  -1    0.14    0.11
  11  -6  -1   -0.12    0.17
  11  -6  -1    0.20    0.13
 -11   6   1    0.41    0.10
 -11   6   1    0.20    0.13
  10  -6  -1    0.04    0.15
   9  -6  -1    5.53    0.54
   9  -6  -1    5.78    0.57
   8  -6  -1    0.13    0.08
   8  -6  -1   -0.10    0.10
   8  -6  -1   -0.03    0.10
   8  -6  -1    0.04    0.12
  -8   6   1    0.16    0.09
  -8   6   1    0.08    0.07
  -8   6   1   -0.03    0.10
   7  -6  -1    0.27    0.10
   7  -6  -1    0.27    0.08
   7  -6  -1    0.26    0.11
   7  -6  -1    0.47    0.09
   7  -6  -1    0.38    0.08
  -7   6   1    0.22    0.07
  -7   6   1    0.46    0.08
  -7   6   1    0.29    0.09
   6  -6  -1   10.14    0.92
   5  -6  -1    0.15    0.07
   5  -6  -1   -0.05    0.07
   5  -6  -1    0.01    0.06
   5  -6  -1   -0.02    0.05
   5  -6  -1    0.10    0.07
   5  -6  -1    0.01    0.08
  -5   6   1    0.06    0.07
  -5   6   1    0.17    0.09
  -5   6   1    0.06    0.07
  -5   6   1    0.04    0.03
   4  -6  -1    0.94    0.12
   4  -6  -1    1.24    0.18
   4  -6  -1    0.82    0.12
   4  -6  -1    0.83    0.12
   4  -6  -1    0.86    0.12
  -4   6   1    0.83    0.09
  -4   6   1    1.18    0.14
   3  -6  -1    0.63    0.10
   3  -6  -1    0.59    0.09
   3  -6  -1    0.74    0.13
   3  -6  -1    0.51    0.12
  -3   6   1    0.54    0.06
  -3   6   1    0.73    0.07
   2  -6  -1    8.65    0.79
   2  -6  -1    8.23    0.72
   2  -6  -1    7.87    0.77
  -2   6   1    8.73    0.68
  -2   6   1    8.17    0.68
   1  -6  -1    1.64    0.19
   1  -6  -1    1.62    0.21
   1  -6  -1    1.80    0.18
   1  -6  -1    1.90    0.21
   1  -6  -1    1.77    0.22
   1  -6  -1    1.74    0.20
  -1   6   1    1.90    0.15
  -1   6   1    1.85    0.15
   0  -6  -1    2.23    0.20
   0  -6  -1    1.80    0.22
   0  -6  -1    2.56    0.25
   0  -6  -1    2.22    0.23
   0   6   1    1.95    0.17
  -1  -6  -1    4.93    0.45
  -1  -6  -1    4.23    0.47
  -1  -6  -1    4.44    0.42
   1   6   1    4.70    0.38
   1   6   1    4.77    0.39
  -2  -6  -1    9.43    0.81
   2   6   1    8.98    0.77
   2   6   1   10.15    0.84
   2   6   1    9.35    0.83
  -3  -6  -1   15.02    1.25
  -3  -6  -1   15.15    1.43
  -3  -6  -1   13.95    1.43
  -3  -6  -1   14.52    1.33
   3   6   1   15.14    1.28
  -4  -6  -1    1.11    0.15
  -4  -6  -1    1.33    0.17
  -4  -6  -1    1.10    0.14
  -4  -6  -1    1.48    0.17
  -4  -6  -1    1.44    0.17
   4   6   1    0.93    0.16
   4   6   1    0.88    0.13
  -5  -6  -1    0.23    0.12
  -5  -6  -1    0.16    0.08
  -5  -6  -1    0.05    0.07
  -5  -6  -1    0.12    0.07
   5   6   1    0.18    0.06
   5   6   1    0.10    0.08
   5   6   1    0.13    0.06
  -6  -6  -1    0.46    0.11
  -6  -6  -1    0.45    0.09
  -6  -6  -1    0.45    0.11
   6   6   1    0.39    0.10
   6   6   1    0.38    0.08
   6   6   1    0.11    0.10
   6   6   1    0.28    0.17
  -7  -6  -1    1.74    0.24
  -7  -6  -1    2.00    0.23
   7   6   1    1.59    0.21
   7   6   1    1.65    0.24
   7   6   1    2.31    0.23
   7   6   1    2.06    0.28
  -8  -6  -1    0.73    0.13
  -8  -6  -1    0.65    0.17
   8   6   1    0.73    0.20
   8   6   1    0.65    0.12
   8   6   1    0.67    0.14
  -9  -6  -1   -0.13    0.15
  -9  -6  -1   -0.08    0.10
   9   6   1    0.08    0.12
   9   6   1    0.12    0.11
   9   6   1   -0.10    0.21
 -10  -6  -1    0.52    0.13
 -10  -6  -1    0.88    0.20
  10   6   1    0.41    0.14
  10   6   1    0.18    0.13
  10   6   1    0.83    0.22
 -11  -6  -1   -0.01    0.11
 -11  -6  -1   -0.57    0.27
  11   6   1   -0.47    0.22
  11   6   1   -0.04    0.18
  11   6   1   -0.10    0.13
 -12  -6  -1    0.11    0.11
  12   6   1    0.16    0.24
  13  -7  -1    0.04    0.13
  12  -7  -1    1.66    0.32
  12  -7  -1    1.85    0.26
 -12   7   1    1.51    0.21
 -12   7   1    1.78    0.25
  11  -7  -1    4.02    0.46
  11  -7  -1    3.84    0.43
  11  -7  -1    4.85    0.47
  11  -7  -1    3.65    0.52
  11  -7  -1    4.16    0.46
 -11   7   1    4.57    0.41
 -11   7   1    4.20    0.43
  10  -7  -1    0.85    0.19
  10  -7  -1    1.28    0.17
  10  -7  -1    0.82    0.19
  10  -7  -1    0.94    0.18
 -10   7   1    1.33    0.18
 -10   7   1    1.39    0.19
   9  -7  -1   73.41    6.64
   8  -7  -1    0.32    0.12
   8  -7  -1    0.35    0.11
   8  -7  -1    0.20    0.10
   8  -7  -1    0.15    0.11
   8  -7  -1    0.33    0.15
   8  -7  -1    0.19    0.09
  -8   7   1    0.34    0.12
  -8   7   1    0.21    0.08
   7  -7  -1   -0.06    0.08
   7  -7  -1    0.03    0.08
   7  -7  -1   -0.01    0.09
   7  -7  -1   -0.06    0.09
   7  -7  -1   -0.07    0.08
   7  -7  -1   -0.04    0.10
  -7   7   1    0.01    0.07
  -7   7   1    0.02    0.09
  -7   7   1   -0.17    0.07
   6  -7  -1    0.48    0.10
   6  -7  -1    0.42    0.13
   6  -7  -1    0.16    0.09
   6  -7  -1    0.17    0.09
   6  -7  -1    0.33    0.10
   6  -7  -1    0.32    0.08
   6  -7  -1    0.06    0.09
  -6   7   1    0.34    0.06
  -6   7   1    0.29    0.10
  -6   7   1    0.24    0.07
   5  -7  -1    6.10    0.64
   5  -7  -1    6.89    0.62
   5  -7  -1    6.12    0.61
  -5   7   1    6.37    0.59
   4  -7  -1    2.36    0.28
   4  -7  -1    2.67    0.27
   4  -7  -1    2.05    0.25
   4  -7  -1    2.43    0.24
  -4   7   1    2.23    0.20
  -4   7   1    2.12    0.19
  -4   7   1    2.01    0.27
   3  -7  -1    4.11    0.38
   3  -7  -1    4.37    0.42
   3  -7  -1    3.54    0.39
  -3   7   1    3.82    0.32
  -3   7   1    3.77    0.32
   2  -7  -1    0.73    0.13
   2  -7  -1    0.94    0.15
   2  -7  -1    0.93    0.13
   2  -7  -1    0.92    0.14
   2  -7  -1    1.20    0.16
   2  -7  -1    1.04    0.15
  -2   7   1    1.00    0.09
  -2   7   1    0.97    0.09
   1  -7  -1    3.18    0.31
   1  -7  -1    3.65    0.34
   1  -7  -1    3.22    0.32
   1  -7  -1    3.20    0.33
   1  -7  -1    3.37    0.34
   1  -7  -1    3.06    0.35
  -1   7   1    3.16    0.26
  -1   7   1    3.07    0.27
   0  -7  -1    0.41    0.09
   0  -7  -1    0.69    0.11
   0  -7  -1    0.50    0.13
   0  -7  -1    0.47    0.09
   0   7   1    0.57    0.06
   0   7   1    0.49    0.06
  -1  -7  -1    0.27    0.08
  -1  -7  -1    0.28    0.08
  -1  -7  -1    0.20    0.10
  -1  -7  -1    0.25    0.06
   1   7   1    0.20    0.10
   1   7   1    0.18    0.03
  -2  -7  -1    5.82    0.50
   2   7   1    5.91    0.47
   2   7   1    5.06    0.52
   2   7   1    6.10    0.48
   2   7   1    5.45    0.51
  -3  -7  -1   10.40    1.07
  -3  -7  -1   11.21    0.93
  -3  -7  -1   11.16    1.06
  -4  -7  -1    8.05    0.72
   4   7   1    8.57    0.75
   4   7   1    8.18    0.69
  -5  -7  -1    4.69    0.49
  -5  -7  -1    5.25    0.43
  -5  -7  -1    4.32    0.45
   5   7   1    4.20    0.44
   5   7   1    4.94    0.43
   5   7   1    5.03    0.41
  -6  -7  -1    0.12    0.08
  -6  -7  -1   -0.31    0.18
  -6  -7  -1    0.16    0.10
  -6  -7  -1    0.14    0.10
   6   7   1    0.22    0.09
   6   7   1    0.10    0.11
   6   7   1    0.15    0.08
  -7  -7  -1   -0.04    0.12
  -7  -7  -1    0.32    0.13
  -7  -7  -1   -0.06    0.08
   7   7   1   -0.01    0.10
   7   7   1    0.08    0.08
  -8  -7  -1    0.34    0.11
  -8  -7  -1    0.25    0.15
   8   7   1    0.47    0.13
   8   7   1    0.29    0.24
  -9  -7  -1   -0.05    0.10
  -9  -7  -1    0.36    0.15
   9   7   1    0.06    0.23
   9   7   1   -0.17    0.10
   9   7   1   -0.03    0.12
 -10  -7  -1    2.13    0.35
 -10  -7  -1    2.64    0.29
  10   7   1    2.63    0.30
  10   7   1    2.30    0.37
 -11  -7  -1    1.78    0.24
  11   7   1    1.64    0.25
 -12  -7  -1    0.14    0.12
  12   7   1    0.15    0.14
  13  -8  -1   -0.01    0.13
 -13   8   1    0.33    0.14
  12  -8  -1    0.73    0.24
  12  -8  -1    0.15    0.12
 -12   8   1    0.33    0.11
 -12   8   1    0.24    0.13
  11  -8  -1    0.00    0.11
  11  -8  -1    0.22    0.17
  11  -8  -1    0.14    0.16
 -11   8   1    0.08    0.13
 -11   8   1    0.17    0.10
  10  -8  -1    0.08    0.13
  10  -8  -1    0.44    0.21
  10  -8  -1    0.57    0.15
  10  -8  -1    0.15    0.14
 -10   8   1    0.43    0.14
 -10   8   1    0.30    0.11
   9  -8  -1    0.84    0.19
   9  -8  -1    1.67    0.25
   9  -8  -1    1.16    0.17
  -9   8   1    1.22    0.16
  -9   8   1    1.30    0.19
   8  -8  -1    2.71    0.31
   8  -8  -1    2.48    0.37
   8  -8  -1    2.91    0.31
   8  -8  -1    3.19    0.32
   8  -8  -1    2.34    0.30
   8  -8  -1    2.45    0.28
  -8   8   1    2.48    0.31
  -8   8   1    2.75    0.27
   7  -8  -1    0.49    0.10
   7  -8  -1    0.34    0.12
   7  -8  -1    0.66    0.13
   7  -8  -1    0.69    0.13
   7  -8  -1    0.77    0.17
   7  -8  -1    0.64    0.13
  -7   8   1    0.37    0.11
  -7   8   1    0.44    0.13
  -7   8   1    0.59    0.10
   6  -8  -1    1.30    0.19
   6  -8  -1    1.72    0.21
   6  -8  -1    1.07    0.17
   6  -8  -1    1.54    0.19
   6  -8  -1    1.38    0.21
   6  -8  -1    1.24    0.17
  -6   8   1    1.50    0.18
  -6   8   1    1.09    0.15
  -6   8   1    1.11    0.16
   5  -8  -1   14.49    1.37
   4  -8  -1    0.38    0.09
   4  -8  -1    0.41    0.10
   4  -8  -1    0.26    0.07
   4  -8  -1   -0.07    0.13
   4  -8  -1    0.30    0.09
   4  -8  -1    0.23    0.09
   4  -8  -1    0.39    0.10
  -4   8   1    0.29    0.06
  -4   8   1    0.31    0.05
   3  -8  -1   10.02    0.98
   3  -8  -1   10.20    1.05
  -3   8   1   11.19    0.88
  -3   8   1   10.95    0.87
   2  -8  -1    4.84    0.46
   2  -8  -1    5.07    0.48
   2  -8  -1    5.38    0.49
   2  -8  -1    4.62    0.43
  -2   8   1    4.49    0.39
  -2   8   1    4.80    0.40
   1  -8  -1   16.41    1.62
   1  -8  -1   17.75    1.62
  -1   8   1   16.19    1.36
   0  -8  -1    1.67    0.18
   0  -8  -1    1.82    0.26
   0  -8  -1    1.70    0.26
   0  -8  -1    1.92    0.22
   0  -8  -1    1.80    0.21
   0  -8  -1    1.96    0.23
   0   8   1    1.86    0.16
   0   8   1    1.97    0.17
  -1  -8  -1    0.70    0.14
  -1  -8  -1    0.99    0.12
  -1  -8  -1    0.85    0.13
  -1  -8  -1    0.60    0.16
  -1  -8  -1    0.86    0.13
  -1  -8  -1    0.95    0.11
   1   8   1    0.83    0.09
   1   8   1    0.72    0.10
   1   8   1    0.88    0.14
  -2  -8  -1    3.15    0.31
  -2  -8  -1    3.38    0.36
  -2  -8  -1    3.29    0.35
  -2  -8  -1    3.89    0.35
  -2  -8  -1    3.00    0.37
  -2  -8  -1    3.38    0.32
  -2  -8  -1    3.20    0.35
   2   8   1    3.44    0.29
   2   8   1    3.57    0.32
   2   8   1    3.37    0.31
  -3  -8  -1    2.27    0.24
  -3  -8  -1    1.96    0.20
  -3  -8  -1    1.62    0.23
  -3  -8  -1    2.08    0.21
   3   8   1    1.64    0.20
   3   8   1    2.01    0.18
  -4  -8  -1    5.76    0.59
  -4  -8  -1    6.06    0.51
  -4  -8  -1    5.54    0.53
   4   8   1    5.71    0.49
  -6  -8  -1    0.81    0.16
  -6  -8  -1    1.07    0.16
  -6  -8  -1    0.95    0.28
  -6  -8  -1    0.96    0.14
   6   8   1    1.27    0.16
   6   8   1    0.84    0.13
  -7  -8  -1    2.02    0.25
  -7  -8  -1    2.31    0.28
  -7  -8  -1    2.08    0.30
   7   8   1    2.47    0.28
   7   8   1    2.33    0.24
  -8  -8  -1    0.08    0.10
  -8  -8  -1    0.06    0.16
  -8  -8  -1    0.12    0.18
   8   8   1    0.16    0.12
   8   8   1    0.09    0.09
  -9  -8  -1    0.07    0.16
  -9  -8  -1    0.06    0.11
   9   8   1    0.01    0.11
   9   8   1   -0.05    0.12
 -10  -8  -1    0.65    0.14
 -10  -8  -1    0.59    0.23
  10   8   1    0.81    0.15
  10   8   1    0.41    0.14
  11   8   1    0.56    0.20
  11   8   1    0.56    0.15
 -12  -8  -1    0.06    0.16
  12   8   1    0.28    0.15
  13  -9  -1    0.32    0.13
 -13   9   1    0.45    0.17
  12  -9  -1    0.10    0.12
  12  -9  -1    0.24    0.20
 -12   9   1   -0.06    0.09
  11  -9  -1    1.04    0.16
  11  -9  -1    0.57    0.18
  11  -9  -1    0.57    0.19
 -11   9   1    0.67    0.16
 -11   9   1    0.85    0.13
  10  -9  -1    4.90    0.45
  10  -9  -1    4.16    0.44
 -10   9   1    3.62    0.39
 -10   9   1    3.78    0.43
   9  -9  -1    1.02    0.19
   9  -9  -1    0.90    0.18
   9  -9  -1    0.82    0.18
  -9   9   1    0.95    0.18
  -9   9   1    1.33    0.17
   8  -9  -1    1.53    0.29
   8  -9  -1    1.60    0.23
   8  -9  -1    0.96    0.18
  -8   9   1    1.17    0.17
  -8   9   1    1.69    0.23
   7  -9  -1    1.60    0.23
   7  -9  -1    1.74    0.20
   7  -9  -1    1.46    0.23
   7  -9  -1    2.16    0.27
  -7   9   1    1.60    0.19
  -7   9   1    1.21    0.21
   6  -9  -1    5.82    0.58
   6  -9  -1    6.51    0.61
   6  -9  -1    5.48    0.60
   6  -9  -1    6.70    0.66
   6  -9  -1    5.95    0.60
  -6   9   1    6.22    0.52
   5  -9  -1    0.65    0.14
   5  -9  -1    0.73    0.13
   5  -9  -1    0.51    0.19
   5  -9  -1    0.78    0.14
   5  -9  -1    0.50    0.13
   5  -9  -1    0.88    0.14
  -5   9   1    0.70    0.12
  -5   9   1    0.86    0.11
  -5   9   1    0.77    0.17
   4  -9  -1    2.55    0.29
   4  -9  -1    2.77    0.29
   4  -9  -1    2.44    0.36
   4  -9  -1    2.85    0.28
   4  -9  -1    2.40    0.29
   4  -9  -1    2.95    0.31
  -4   9   1    2.75    0.24
  -4   9   1    2.63    0.23
   3  -9  -1    0.43    0.09
   3  -9  -1    0.26    0.10
   3  -9  -1    0.55    0.17
   3  -9  -1    0.11    0.10
   3  -9  -1    0.32    0.09
   3  -9  -1    0.33    0.10
   3  -9  -1    0.43    0.15
   3  -9  -1    0.30    0.10
  -3   9   1    0.31    0.05
  -3   9   1    0.31    0.04
   2  -9  -1    0.47    0.12
   2  -9  -1    0.49    0.10
   2  -9  -1    0.37    0.11
   2  -9  -1    0.50    0.10
   2  -9  -1    0.60    0.12
   2  -9  -1    0.52    0.09
   2  -9  -1    0.51    0.11
  -2   9   1    0.33    0.05
   1  -9  -1    0.71    0.11
   1  -9  -1    0.83    0.13
   1  -9  -1    0.63    0.14
   1  -9  -1    0.88    0.13
   1  -9  -1    0.69    0.13
   1  -9  -1    0.80    0.11
   0  -9  -1    1.94    0.25
   0  -9  -1    2.34    0.22
   0  -9  -1    2.15    0.28
   0  -9  -1    2.04    0.25
   0  -9  -1    2.04    0.24
   0  -9  -1    2.14    0.27
   0  -9  -1    2.43    0.26
   0   9   1    2.21    0.19
   0   9   1    2.02    0.19
  -1  -9  -1    0.14    0.06
  -1  -9  -1    0.19    0.07
  -1  -9  -1    0.10    0.08
  -1  -9  -1    0.10    0.07
  -1  -9  -1    0.08    0.07
   1   9   1    0.01    0.09
   1   9   1    0.39    0.13
   1   9   1    0.11    0.07
  -2  -9  -1    1.47    0.19
  -2  -9  -1    1.70    0.17
  -2  -9  -1    1.46    0.21
  -2  -9  -1    1.47    0.23
  -2  -9  -1    1.25    0.22
   2   9   1    1.59    0.16
   2   9   1    1.65    0.18
  -3  -9  -1    0.06    0.07
  -3  -9  -1    0.04    0.08
  -3  -9  -1    0.00    0.08
  -3  -9  -1    0.09    0.10
  -3  -9  -1    0.02    0.10
   3   9   1   -0.07    0.07
   3   9   1   -0.02    0.07
   3   9   1    0.04    0.10
  -6  -9  -1    0.63    0.15
  -6  -9  -1    0.62    0.12
  -6  -9  -1    0.70    0.14
   6   9   1    0.60    0.11
   6   9   1    0.71    0.14
  -7  -9  -1    2.23    0.24
  -7  -9  -1    1.61    0.26
   7   9   1    1.82    0.26
   7   9   1    2.00    0.23
  -8  -9  -1    0.19    0.16
  -8  -9  -1   -0.03    0.10
  -8  -9  -1   -0.13    0.17
   8   9   1    0.05    0.12
   8   9   1    0.08    0.10
  -9  -9  -1    0.54    0.19
  -9  -9  -1    0.49    0.12
   9   9   1    0.48    0.14
   9   9   1    0.43    0.13
 -10  -9  -1    0.49    0.13
  10   9   1    0.39    0.14
  10   9   1    0.40    0.14
 -11  -9  -1   -0.06    0.15
 -11  -9  -1    0.22    0.15
  11   9   1    0.19    0.13
  11   9   1   -0.07    0.21
  12 -10  -1    0.98    0.24
  11 -10  -1    0.00    0.12
  11 -10  -1   -0.03    0.16
  11 -10  -1    0.23    0.15
 -11  10   1    0.17    0.17
 -11  10   1    0.26    0.10
  10 -10  -1    1.38    0.21
  10 -10  -1    1.21    0.21
  10 -10  -1    1.46    0.20
 -10  10   1    1.39    0.18
 -10  10   1    0.99    0.20
   9 -10  -1    0.26    0.14
   9 -10  -1    0.34    0.14
   9 -10  -1    0.30    0.15
  -9  10   1    0.31    0.17
  -9  10   1    0.24    0.10
   8 -10  -1    0.50    0.15
   8 -10  -1    0.34    0.14
   8 -10  -1    0.60    0.14
   8 -10  -1    0.46    0.15
  -8  10   1    0.56    0.11
   7 -10  -1    0.33    0.14
   7 -10  -1    0.32    0.12
   7 -10  -1    0.37    0.12
  -7  10   1    0.41    0.10
  -7  10   1    0.39    0.17
   6 -10  -1    0.10    0.11
   6 -10  -1    0.03    0.11
   6 -10  -1   -0.07    0.11
   6 -10  -1    0.05    0.10
   6 -10  -1    0.12    0.08
  -6  10   1    0.06    0.18
  -6  10   1    0.16    0.09
   5 -10  -1    0.83    0.15
   5 -10  -1    0.76    0.15
   5 -10  -1    1.19    0.16
   5 -10  -1    1.04    0.15
  -5  10   1    0.91    0.14
  -5  10   1    0.66    0.11
   4 -10  -1    0.20    0.11
   4 -10  -1    0.13    0.11
   4 -10  -1    0.09    0.07
   4 -10  -1    0.12    0.10
   4 -10  -1    0.01    0.09
   4 -10  -1    0.06    0.07
  -4  10   1    0.14    0.05
   3 -10  -1    0.77    0.13
   3 -10  -1    0.80    0.19
   3 -10  -1    0.60    0.12
   3 -10  -1    0.70    0.14
   3 -10  -1    0.67    0.13
   3 -10  -1    0.73    0.13
   3 -10  -1    0.66    0.14
  -3  10   1    0.69    0.07
   2 -10  -1    0.32    0.13
   2 -10  -1    0.42    0.11
   2 -10  -1    0.45    0.12
   2 -10  -1    0.30    0.13
   2 -10  -1    0.39    0.10
   2 -10  -1    0.32    0.09
   2 -10  -1    0.29    0.10
  -2  10   1    0.41    0.05
   1 -10  -1    1.04    0.16
   1 -10  -1    0.89    0.15
   1 -10  -1    1.09    0.16
   1 -10  -1    0.96    0.16
   1 -10  -1    1.05    0.13
   1 -10  -1    0.77    0.14
  -1  10   1    1.00    0.10
  -1  10   1    1.02    0.11
   0 -10  -1    1.34    0.22
   0 -10  -1    1.34    0.19
   0 -10  -1    1.32    0.19
   0 -10  -1    1.02    0.16
   0 -10  -1    1.01    0.18
   0 -10  -1    1.38    0.17
   0 -10  -1    1.20    0.16
   0  10   1    1.20    0.13
  -1 -10  -1    2.64    0.31
  -1 -10  -1    3.09    0.31
  -1 -10  -1    2.57    0.38
  -1 -10  -1    3.07    0.28
   1  10   1    2.61    0.29
   1  10   1    2.93    0.26
  -2 -10  -1   -0.01    0.09
  -2 -10  -1    0.06    0.06
  -2 -10  -1    0.08    0.10
  -2 -10  -1    0.13    0.10
   2  10   1    0.00    0.08
   2  10   1    0.09    0.07
   2  10   1    0.07    0.13
  -3 -10  -1    0.41    0.13
  -3 -10  -1    0.50    0.11
  -3 -10  -1    0.36    0.13
  -3 -10  -1    0.30    0.12
   3  10   1    0.44    0.10
   3  10   1    0.66    0.13
   3  10   1    0.53    0.11
  -6 -10  -1    1.66    0.23
  -6 -10  -1    1.46    0.21
   6  10   1    1.43    0.20
  -7 -10  -1    0.11    0.15
  -7 -10  -1   -0.07    0.14
  -7 -10  -1    0.16    0.14
  -7 -10  -1    0.16    0.11
   7  10   1   -0.12    0.09
   7  10   1    0.05    0.13
  -8 -10  -1    1.12    0.18
  -8 -10  -1    1.47    0.22
  -8 -10  -1    1.72    0.25
  -8 -10  -1    0.91    0.23
   8  10   1    1.11    0.17
   8  10   1    1.37    0.19
  -9 -10  -1    0.03    0.19
  -9 -10  -1    0.17    0.13
  -9 -10  -1    0.04    0.14
   9  10   1    0.22    0.14
   9  10   1    0.21    0.11
 -10 -10  -1   -0.16    0.29
  10  10   1    0.37    0.14
  12 -11  -1    0.50    0.21
  12 -11  -1   -0.04    0.13
 -12  11   1   -0.23    0.10
  11 -11  -1   -0.03    0.16
  11 -11  -1   -0.17    0.12
  11 -11  -1    0.14    0.20
 -11  11   1    0.10    0.10
  10 -11  -1   -0.03    0.14
  10 -11  -1    0.00    0.13
  10 -11  -1    0.17    0.14
 -10  11   1    0.20    0.10
 -10  11   1    0.05    0.19
   9 -11  -1    0.39    0.15
   9 -11  -1   -0.13    0.14
   9 -11  -1   -0.01    0.12
  -9  11   1    0.04    0.19
  -9  11   1   -0.07    0.10
   8 -11  -1   10.52    1.00
   8 -11  -1    9.78    0.97
  -8  11   1   10.48    0.96
   7 -11  -1    0.68    0.17
   7 -11  -1    0.80    0.15
   7 -11  -1    0.52    0.15
   7 -11  -1    0.78    0.15
   6 -11  -1    0.05    0.14
   6 -11  -1   -0.05    0.12
   6 -11  -1    0.00    0.10
   6 -11  -1   -0.05    0.11
   6 -11  -1   -0.04    0.12
  -6  11   1    0.11    0.10
   5 -11  -1   -0.09    0.13
   5 -11  -1    0.02    0.12
   5 -11  -1    0.06    0.11
   5 -11  -1    0.21    0.13
   5 -11  -1    0.02    0.12
  -5  11   1   -0.08    0.11
   4 -11  -1    0.86    0.17
   4 -11  -1    0.72    0.15
   4 -11  -1    0.79    0.16
   4 -11  -1    0.84    0.15
   4 -11  -1    0.59    0.14
   4 -11  -1    1.11    0.17
   3 -11  -1    0.21    0.10
   3 -11  -1   -0.12    0.14
   3 -11  -1    0.10    0.10
   3 -11  -1    0.18    0.11
   3 -11  -1    0.24    0.13
   3 -11  -1    0.16    0.10
   2 -11  -1    0.96    0.14
   2 -11  -1    0.49    0.13
   2 -11  -1    0.53    0.19
   2 -11  -1    0.80    0.15
   2 -11  -1    0.69    0.17
   2 -11  -1    0.72    0.13
   2 -11  -1    0.73    0.18
   1 -11  -1    0.71    0.12
   1 -11  -1    0.67    0.14
   1 -11  -1    0.63    0.15
   1 -11  -1    0.84    0.15
   1 -11  -1    0.34    0.16
   1 -11  -1    0.88    0.14
   0 -11  -1    3.56    0.39
   0 -11  -1    3.74    0.36
   0 -11  -1    2.85    0.33
   0 -11  -1    3.57    0.39
   0 -11  -1    3.71    0.39
   0  11   1    3.13    0.29
  -1 -11  -1    2.11    0.28
  -1 -11  -1    2.45    0.29
  -1 -11  -1    2.51    0.24
  -1 -11  -1    2.43    0.27
   1  11   1    1.95    0.24
   1  11   1    2.67    0.26
  -5 -11  -1    3.62    0.42
  -5 -11  -1    3.75    0.38
  -5 -11  -1    3.80    0.43
   5  11   1    3.90    0.37
   5  11   1    3.57    0.42
  -6 -11  -1    0.22    0.15
  -6 -11  -1   -0.17    0.14
  -6 -11  -1   -0.03    0.12
   6  11   1    0.06    0.13
   6  11   1    0.23    0.10
  -7 -11  -1    0.55    0.17
  -7 -11  -1    0.23    0.15
  -7 -11  -1    0.20    0.15
   7  11   1    0.54    0.12
   7  11   1    0.39    0.15
  -8 -11  -1    0.24    0.17
  -8 -11  -1    0.60    0.21
  -8 -11  -1    0.31    0.15
   8  11   1    0.58    0.13
   8  11   1    0.43    0.15
  -9 -11  -1    0.19    0.22
  -9 -11  -1    0.16    0.15
   9  11   1    0.25    0.12
   9  11   1    0.28    0.15
 -10 -11  -1    0.21    0.16
  10  11   1   -0.12    0.16
  10  11   1    0.14    0.15
  11 -12  -1    0.77    0.16
  11 -12  -1    0.62    0.19
  11 -12  -1    0.66    0.18
  10 -12  -1   -0.13    0.14
  10 -12  -1    0.06    0.15
  10 -12  -1    0.04    0.14
 -10  12   1   -0.10    0.10
   9 -12  -1    1.28    0.22
   9 -12  -1    1.59    0.23
   9 -12  -1    1.51    0.22
  -9  12   1    1.49    0.21
   8 -12  -1   -0.16    0.14
   8 -12  -1   -0.12    0.14
   8 -12  -1    0.09    0.13
   8 -12  -1   -0.02    0.13
  -8  12   1    0.15    0.10
   7 -12  -1    1.36    0.21
   7 -12  -1    0.90    0.18
   7 -12  -1    0.77    0.18
   7 -12  -1    1.09    0.19
  -7  12   1    1.44    0.19
   6 -12  -1    1.13    0.19
   6 -12  -1    0.99    0.19
   6 -12  -1    1.24    0.19
   6 -12  -1    0.80    0.19
  -6  12   1    1.36    0.17
   5 -12  -1    2.00    0.31
  -5  12   1    2.09    0.24
   4 -12  -1    5.56    0.62
   4 -12  -1    6.61    0.61
   4 -12  -1    5.91    0.63
   4 -12  -1    6.12    0.60
   3 -12  -1   -0.23    0.18
   3 -12  -1   -0.04    0.11
   3 -12  -1   -0.06    0.12
   3 -12  -1    0.22    0.13
   3 -12  -1    0.11    0.13
   3 -12  -1   -0.07    0.11
   2 -12  -1    2.29    0.27
   2 -12  -1    1.75    0.25
   2 -12  -1    1.98    0.24
   2 -12  -1    2.36    0.27
   2 -12  -1    1.52    0.26
   1 -12  -1    1.26    0.22
   1 -12  -1    1.48    0.23
   1 -12  -1    1.70    0.23
   1 -12  -1    1.59    0.23
   1 -12  -1    1.57    0.20
   0 -12  -1    3.74    0.38
   0 -12  -1    3.64    0.41
   0 -12  -1    4.51    0.44
   0 -12  -1    4.34    0.43
   0  12   1    3.46    0.38
  -3 -12  -1    3.68    0.37
  -3 -12  -1    3.67    0.42
  -3 -12  -1    3.63    0.41
   3  12   1    3.43    0.41
  -4 -12  -1    0.55    0.15
  -4 -12  -1    0.54    0.14
  -4 -12  -1    0.32    0.13
   4  12   1    0.74    0.17
   4  12   1    0.64    0.12
  -5 -12  -1    1.30    0.22
  -5 -12  -1    1.69    0.25
  -5 -12  -1    1.10    0.19
   5  12   1    1.23    0.18
   5  12   1    1.60    0.21
  -6 -12  -1    0.37    0.14
  -6 -12  -1    0.57    0.17
  -6 -12  -1    0.66    0.18
   6  12   1    0.61    0.13
   6  12   1    0.54    0.16
  -7 -12  -1    2.70    0.37
  -7 -12  -1    2.51    0.34
  -7 -12  -1    2.72    0.34
   7  12   1    2.59    0.30
   7  12   1    3.30    0.34
  -8 -12  -1   -0.31    0.23
  -8 -12  -1    0.02    0.15
   8  12   1    0.00    0.11
  -9 -12  -1    0.05    0.28
  -9 -12  -1    0.21    0.17
   9  12   1    0.21    0.16
   9  12   1   -0.12    0.12
  11 -13  -1    0.46    0.18
  11 -13  -1    0.52    0.17
  11 -13  -1   -0.22    0.19
 -11  13   1    0.13    0.12
  10 -13  -1    0.88    0.19
  10 -13  -1    0.84    0.19
  10 -13  -1    1.20    0.20
 -10  13   1    0.81    0.15
   9 -13  -1    0.82    0.17
   9 -13  -1    0.40    0.14
   9 -13  -1    0.53    0.16
  -9  13   1    0.45    0.13
   8 -13  -1    0.67    0.19
   8 -13  -1    0.95    0.18
   8 -13  -1    1.28    0.20
   8 -13  -1    1.17    0.20
  -8  13   1    1.25    0.16
   7 -13  -1    2.60    0.32
   7 -13  -1    2.69    0.32
   7 -13  -1    3.30    0.37
   7 -13  -1    2.41    0.33
  -7  13   1    2.25    0.29
   6 -13  -1    0.75    0.18
   6 -13  -1    0.32    0.15
   6 -13  -1    0.41    0.14
   6 -13  -1    0.24    0.14
  -6  13   1    0.12    0.13
   5 -13  -1    1.06    0.20
   5 -13  -1    0.92    0.17
   5 -13  -1    0.75    0.17
   5 -13  -1    0.58    0.15
   5 -13  -1    0.88    0.19
  -5  13   1    0.77    0.17
   4 -13  -1    0.69    0.17
   4 -13  -1    0.81    0.15
   4 -13  -1    0.68    0.16
   4 -13  -1    0.28    0.17
   3 -13  -1    0.14    0.12
   3 -13  -1    0.15    0.13
   3 -13  -1    0.13    0.14
   2 -13  -1    2.45    0.61
   0 -13  -1    0.06    0.12
   0 -13  -1    0.03    0.14
   0  13   1    0.16    0.13
  -3 -13  -1    1.12    0.24
  -3 -13  -1    1.10    0.18
  -3 -13  -1    1.34    0.21
  -3 -13  -1    1.41    0.22
   3  13   1    1.30    0.17
  -4 -13  -1    0.39    0.16
  -4 -13  -1    0.46    0.15
  -4 -13  -1    0.49    0.13
   4  13   1    0.26    0.12
   4  13   1    0.52    0.18
  -5 -13  -1    0.48    0.14
  -5 -13  -1    0.13    0.15
  -5 -13  -1    0.07    0.15
   5  13   1    0.30    0.17
   5  13   1    0.24    0.11
  -6 -13  -1    0.06    0.16
  -6 -13  -1    0.08    0.14
  -6 -13  -1   -0.04    0.15
   6  13   1    0.00    0.11
   6  13   1    0.27    0.17
  -7 -13  -1   -0.05    0.16
  -7 -13  -1   -0.16    0.17
   7  13   1   -0.09    0.11
   7  13   1    0.18    0.18
  -8 -13  -1    0.07    0.16
  -8 -13  -1    0.10    0.22
   8  13   1    0.01    0.18
   8  13   1   -0.09    0.12
  10 -14  -1    0.49    0.18
  10 -14  -1    0.61    0.18
   9 -14  -1    0.63    0.20
  -9  14   1    0.07    0.13
   8 -14  -1    0.59    0.16
   8 -14  -1    0.80    0.18
   8 -14  -1    0.83    0.17
   8 -14  -1    1.37    0.23
   7 -14  -1    0.21    0.14
   7 -14  -1    0.55    0.22
   7 -14  -1   -0.11    0.13
   7 -14  -1    0.20    0.14
  -7  14   1   -0.10    0.13
   6 -14  -1    0.67    0.23
   6 -14  -1    0.63    0.15
   6 -14  -1    0.74    0.16
   6 -14  -1    0.68    0.16
  -6  14   1    0.33    0.15
   5 -14  -1    0.49    0.16
   5 -14  -1    0.49    0.15
   5 -14  -1    0.53    0.16
   5 -14  -1    0.08    0.15
  -5  14   1    0.54    0.16
   4 -14  -1    0.28    0.15
   4 -14  -1    0.49    0.15
   4 -14  -1    0.67    0.17
   4 -14  -1    0.41    0.15
   3 -14  -1    0.10    0.13
   3 -14  -1    0.17    0.14
   3 -14  -1    0.23    0.14
   3 -14  -1    0.22    0.16
   3 -14  -1    0.33    0.14
   2 -14  -1   -0.01    0.18
   2 -14  -1   -0.05    0.14
   2 -14  -1   -0.18    0.12
   2 -14  -1    0.07    0.13
   2 -14  -1    0.16    0.14
   1 -14  -1    0.40    0.15
   1 -14  -1    0.49    0.16
   1 -14  -1    0.43    0.13
   1 -14  -1    0.79    0.16
  -1  14   1    0.74    0.16
   0 -14  -1    0.49    0.15
   0 -14  -1    0.22    0.11
   0 -14  -1    0.49    0.16
   0 -14  -1    0.29    0.15
   0  14   1    0.27    0.14
  -1 -14  -1    0.52    0.16
  -1 -14  -1    0.27    0.12
  -1 -14  -1    0.31    0.15
  -1 -14  -1    0.53    0.16
   1  14   1    0.49    0.14
  -2 -14  -1   -0.19    0.13
  -2 -14  -1    0.27    0.17
  -2 -14  -1   -0.07    0.14
  -2 -14  -1   -0.08    0.11
   2  14   1    0.11    0.12
  -3 -14  -1    0.19    0.11
  -3 -14  -1    0.18    0.16
  -3 -14  -1    0.21    0.15
   3  14   1    0.22    0.12
  -4 -14  -1    0.21    0.15
  -4 -14  -1   -0.02    0.12
  -4 -14  -1    0.12    0.15
   4  14   1    0.01    0.11
  -5 -14  -1    0.19    0.16
  -5 -14  -1    0.35    0.14
  -5 -14  -1    0.01    0.14
   5  14   1    0.32    0.12
  -6 -14  -1   -0.10    0.16
   6  14   1   -0.05    0.12
  -7 -14  -1    0.03    0.19
  -7 -14  -1   -0.02    0.17
   7  14   1    0.07    0.12
   9 -15  -1    0.38    0.17
   9 -15  -1    0.48    0.16
   8 -15  -1    1.73    0.25
   8 -15  -1    2.05    0.29
   7 -15  -1    0.07    0.13
   7 -15  -1    0.21    0.14
   7 -15  -1   -0.11    0.15
  -7  15   1    0.21    0.16
   6 -15  -1    2.02    0.26
   6 -15  -1    1.66    0.24
   6 -15  -1    1.58    0.24
   5 -15  -1    1.53    0.21
   5 -15  -1    1.24    0.21
   5 -15  -1    1.01    0.21
   5 -15  -1    1.32    0.20
   4 -15  -1    0.08    0.14
   4 -15  -1   -0.05    0.13
   4 -15  -1    0.21    0.16
   4 -15  -1    0.06    0.17
   3 -15  -1    2.91    0.37
   3 -15  -1    3.33    0.35
   3 -15  -1    2.29    0.35
   3 -15  -1    2.94    0.38
   2 -15  -1    1.71    0.23
   2 -15  -1    2.09    0.29
   2 -15  -1    1.80    0.26
   2 -15  -1    1.74    0.27
   1 -15  -1    0.18    0.14
   1 -15  -1    0.14    0.14
   1 -15  -1    0.14    0.13
   1 -15  -1   -0.08    0.15
  -1  15   1   -0.01    0.17
   0 -15  -1    0.73    0.19
   0 -15  -1    0.97    0.17
   0 -15  -1    0.93    0.20
   0 -15  -1    0.81    0.18
   0  15   1    1.05    0.18
  -1 -15  -1    1.01    0.23
  -1 -15  -1    1.45    0.22
  -1 -15  -1    1.45    0.22
  -1 -15  -1    1.30    0.19
   1  15   1    1.46    0.20
  -2 -15  -1    1.11    0.28
  -2 -15  -1    0.95    0.20
  -2 -15  -1    0.88    0.17
  -2 -15  -1    1.20    0.21
   2  15   1    1.22    0.17
  -3 -15  -1    1.14    0.21
  -3 -15  -1    1.47    0.22
  -3 -15  -1    1.31    0.19
   3  15   1    1.41    0.19
  -4 -15  -1    2.12    0.27
  -4 -15  -1    2.45    0.32
  -4 -15  -1    2.24    0.31
   4  15   1    2.11    0.28
  -5 -15  -1    0.00    0.16
  -5 -15  -1    0.21    0.16
  -5 -15  -1    0.29    0.14
   5  15   1    0.10    0.13
  -6 -15  -1    0.04    0.18
  -6 -15  -1    0.21    0.18
   6  15   1    0.03    0.12
   7 -16  -1    0.21    0.18
   7 -16  -1   -0.08    0.15
   7 -16  -1    0.01    0.15
   6 -16  -1    0.24    0.14
   6 -16  -1    0.10    0.15
   6 -16  -1   -0.04    0.18
   5 -16  -1   -0.06    0.19
   5 -16  -1    0.05    0.14
   5 -16  -1    0.27    0.14
   4 -16  -1    0.41    0.24
   4 -16  -1    0.24    0.15
   4 -16  -1    0.21    0.17
   4 -16  -1    0.13    0.14
   3 -16  -1    0.88    0.19
   3 -16  -1    0.77    0.17
   3 -16  -1    0.64    0.18
   2 -16  -1    0.19    0.15
   2 -16  -1    0.38    0.17
   2 -16  -1    0.43    0.17
   1 -16  -1    0.01    0.15
   1 -16  -1   -0.04    0.13
   1 -16  -1   -0.01    0.17
   1 -16  -1    0.10    0.14
   0 -16  -1    2.24    0.32
   0 -16  -1    1.83    0.26
   0 -16  -1    2.30    0.29
   0 -16  -1    1.53    0.25
  -1 -16  -1    0.42    0.26
  -1 -16  -1    0.22    0.15
  -1 -16  -1   -0.12    0.14
  -1 -16  -1    0.10    0.12
   1  16   1   -0.15    0.16
  -2 -16  -1    0.44    0.16
  -2 -16  -1    0.29    0.14
  -2 -16  -1    0.58    0.17
   2  16   1    0.62    0.16
  -3 -16  -1    0.06    0.13
  -3 -16  -1    0.28    0.16
   3  16   1    0.67    0.15
  -4 -16  -1    0.08    0.17
  -4 -16  -1   -0.03    0.14
  -4 -16  -1    0.30    0.17
   4  16   1    0.54    0.14
   5 -17  -1    0.65    0.16
   5 -17  -1    0.36    0.18
   4 -17  -1    0.62    0.17
   4 -17  -1    0.72    0.19
   3 -17  -1    0.16    0.14
   3 -17  -1    0.09    0.16
   3 -17  -1    0.03    0.18
   2 -17  -1    0.12    0.15
   2 -17  -1   -0.16    0.20
   2 -17  -1    0.19    0.15
   1 -17  -1    0.55    0.22
   1 -17  -1    0.09    0.15
   1 -17  -1    0.24    0.15
   0 -17  -1    0.97    0.19
   0 -17  -1    0.74    0.18
  -1 -17  -1    0.68    0.18
  -2 -17  -1    0.25    0.16
  -2 -17  -1    0.55    0.18
   2  18  -2    0.40    0.14
  -2 -18   2   -0.14    0.15
  -2 -18   2   -0.01    0.16
  -1 -18   2    0.10    0.14
  -1 -18   2    0.08    0.14
  -1 -18   2   -0.34    0.24
   0  18  -2   -0.17    0.14
   0 -18   2    0.13    0.14
   0 -18   2    0.03    0.20
   0 -18   2    0.15    0.15
  -1  18  -2    0.17    0.16
   1 -18   2    0.31    0.14
   1 -18   2    0.35    0.19
   1 -18   2    0.09    0.15
  -2  18  -2    0.03    0.16
   2 -18   2    0.07    0.14
   2 -18   2    0.28    0.14
   2 -18   2    0.21    0.17
  -3  18  -2    0.21    0.18
   3 -18   2    0.36    0.15
   3 -18   2    0.02    0.16
   4 -18   2    1.40    0.22
   4 -18   2    1.81    0.26
   4  17  -2    2.29    0.25
  -4 -17   2    1.89    0.28
  -4 -17   2    1.60    0.28
   3  17  -2    2.71    0.28
  -3 -17   2    2.23    0.34
  -3 -17   2    2.44    0.32
   2  17  -2    0.06    0.12
  -2 -17   2   -0.08    0.20
  -2 -17   2    0.17    0.14
  -1 -17   2   -0.04    0.14
  -1 -17   2    0.15    0.14
   0 -17   2   -0.03    0.16
   0 -17   2    0.04    0.14
   0 -17   2   -0.07    0.14
   1 -17   2    0.68    0.16
   1 -17   2    0.39    0.15
   1 -17   2    0.47    0.16
   2 -17   2    0.39    0.15
   2 -17   2    0.23    0.14
   2 -17   2   -0.05    0.14
  -3  17  -2    0.26    0.13
   3 -17   2    0.09    0.14
   3 -17   2    0.20    0.14
   3 -17   2    0.09    0.14
  -4  17  -2    0.33    0.13
   4 -17   2    0.03    0.21
   4 -17   2    0.28    0.14
   4 -17   2    0.38    0.15
  -5  17  -2   -0.06    0.13
   5 -17   2   -0.15    0.18
   5 -17   2   -0.07    0.13
   5 -17   2    0.11    0.14
  -6  17  -2    0.07    0.14
   6 -17   2   -0.25    0.17
   6 -17   2   -0.06    0.14
   6 -17   2   -0.02    0.15
   6  16  -2    0.06    0.12
  -6 -16   2    0.18    0.16
   5  16  -2    0.23    0.11
  -5 -16   2    0.09    0.18
  -5 -16   2    0.20    0.15
   4  16  -2   -0.06    0.11
  -4 -16   2    0.07    0.14
  -4 -16   2   -0.06    0.17
  -4 -16   2   -0.06    0.29
   3  16  -2    0.49    0.12
  -3 -16   2    0.56    0.17
  -3 -16   2    0.63    0.22
  -3 -16   2    0.28    0.15
   2  16  -2    0.91    0.15
  -2 -16   2    0.89    0.19
  -2 -16   2    0.66    0.18
  -2 -16   2    0.63    0.17
   1  16  -2    0.10    0.11
  -1 -16   2   -0.06    0.14
  -1 -16   2    0.01    0.15
  -1 -16   2   -0.08    0.12
   0  16  -2    1.83    0.23
   0 -16   2    1.74    0.25
   0 -16   2    1.71    0.25
   0 -16   2    1.54    0.25
  -1  16  -2    0.68    0.13
   1 -16   2    0.50    0.16
   1 -16   2    0.62    0.15
   1 -16   2    0.53    0.16
  -2  16  -2    0.06    0.12
   2 -16   2   -0.19    0.13
   2 -16   2    0.09    0.13
   2 -16   2   -0.16    0.23
   2 -16   2   -0.07    0.14
  -3  16  -2   -0.05    0.12
   3 -16   2    0.20    0.14
   3 -16   2   -0.15    0.13
   3 -16   2   -0.11    0.18
   3 -16   2    0.13    0.13
  -4  16  -2    0.06    0.12
   4 -16   2    0.19    0.13
   4 -16   2    0.36    0.14
   4 -16   2    0.07    0.17
  -5  16  -2    0.90    0.14
   5 -16   2    0.52    0.15
   5 -16   2    0.59    0.15
   5 -16   2    0.39    0.18
   6 -16   2    0.26    0.13
   6 -16   2    0.23    0.15
   6 -16   2    0.32    0.14
  -7  16  -2   -0.13    0.11
   7 -16   2   -0.11    0.14
   7 -16   2    0.29    0.15
   7 -16   2   -0.28    0.14
  -8  16  -2    0.34    0.12
   8 -16   2    0.09    0.13
   8 -16   2    0.26    0.17
   7  15  -2   -0.07    0.19
   7  15  -2    0.07    0.12
  -7 -15   2   -0.21    0.14
   6  15  -2    0.19    0.18
  -6 -15   2    0.22    0.21
   5  15  -2    1.96    0.23
  -5 -15   2    2.41    0.32
  -5 -15   2    1.59    0.26
   4  15  -2    1.18    0.17
  -4 -15   2    1.37    0.23
  -4 -15   2    1.28    0.21
  -4 -15   2    1.04    0.20
   3  15  -2    3.22    0.33
   3  15  -2    2.72    0.40
  -3 -15   2    3.27    0.34
  -3 -15   2    2.94    0.39
  -3 -15   2    3.82    0.40
  -3 -15   2    3.24    0.38
   2  15  -2    0.79    0.13
  -2 -15   2    0.30    0.15
  -2 -15   2    0.58    0.17
  -2 -15   2    0.66    0.17
  -2 -15   2    0.38    0.13
   1  15  -2    0.56    0.13
  -1 -15   2    0.52    0.17
  -1 -15   2    0.57    0.16
  -1 -15   2    0.52    0.16
  -1 -15   2    0.19    0.13
   0  15  -2    1.30    0.16
   0 -15   2    0.88    0.19
   0 -15   2    1.18    0.20
   0 -15   2    1.02    0.16
   0 -15   2    0.94    0.19
  -1  15  -2   -0.03    0.11
   1 -15   2    0.00    0.12
   1 -15   2    0.05    0.12
   1 -15   2    0.10    0.14
   1 -15   2    0.15    0.20
  -2  15  -2    2.82    0.30
   2 -15   2    2.63    0.34
   2 -15   2    2.20    0.32
   2 -15   2    2.96    0.34
   2 -15   2    2.90    0.36
  -3  15  -2   -0.05    0.11
   3 -15   2    0.26    0.14
   3 -15   2    0.29    0.16
   3 -15   2   -0.06    0.13
   3 -15   2    0.06    0.13
  -4  15  -2    0.42    0.13
   4 -15   2    0.27    0.14
   4 -15   2    0.73    0.16
   4 -15   2    0.69    0.16
   4 -15   2    0.49    0.17
  -5  15  -2    0.51    0.13
   5 -15   2    0.88    0.17
   5 -15   2    0.92    0.18
   5 -15   2    0.77    0.18
  -6  15  -2   -0.09    0.10
   6 -15   2    0.07    0.13
   6 -15   2    0.19    0.14
   6 -15   2   -0.15    0.13
  -7  15  -2    4.06    0.41
   7 -15   2    4.29    0.45
   7 -15   2    4.54    0.46
   7 -15   2    4.07    0.46
  -8  15  -2    0.14    0.12
   8 -15   2    0.06    0.14
  -9  15  -2    1.21    0.16
   9 -15   2    1.24    0.22
   9 -15   2    1.04    0.19
   8  14  -2   -0.18    0.15
   8  14  -2    0.44    0.13
  -8 -14   2   -0.12    0.15
   7  14  -2    0.15    0.12
  -7 -14   2    0.11    0.14
  -7 -14   2    0.46    0.26
   6  14  -2    1.11    0.16
   6  14  -2    1.18    0.19
  -6 -14   2    0.92    0.18
  -6 -14   2    0.64    0.17
  -6 -14   2    1.17    0.22
   5  14  -2    0.03    0.15
   5  14  -2    0.21    0.11
  -5 -14   2    0.18    0.16
  -5 -14   2   -0.11    0.18
  -5 -14   2    0.34    0.13
  -5 -14   2   -0.04    0.14
   4  14  -2    0.65    0.13
   4  14  -2    0.33    0.16
  -4 -14   2    0.62    0.17
  -4 -14   2    0.41    0.17
  -4 -14   2    0.51    0.16
  -4 -14   2    0.65    0.14
   3  14  -2    0.34    0.11
   3  14  -2    0.62    0.17
  -3 -14   2    0.34    0.13
  -3 -14   2    0.44    0.15
  -3 -14   2    0.29    0.14
  -3 -14   2    0.31    0.14
   2  14  -2    3.98    0.44
   2  14  -2    3.90    0.40
  -2 -14   2    4.59    0.40
  -2 -14   2    4.21    0.45
  -2 -14   2    3.77    0.44
  -2 -14   2    4.34    0.46
   1  14  -2    2.77    0.27
   1  14  -2    2.92    0.35
  -1 -14   2    2.51    0.33
  -1 -14   2    2.31    0.32
  -1 -14   2    2.36    0.29
  -1 -14   2    2.45    0.31
   0  14  -2    2.08    0.26
   0 -14   2    2.62    0.30
   0 -14   2    2.70    0.31
   0 -14   2    2.31    0.27
  -1  14  -2    0.13    0.11
   1 -14   2    0.12    0.11
   1 -14   2    0.16    0.11
   1 -14   2    0.04    0.13
   1 -14   2    0.40    0.13
  -2  14  -2    2.27    0.27
   2 -14   2    2.31    0.30
   2 -14   2    2.24    0.30
   2 -14   2    2.58    0.32
  -3  14  -2    0.21    0.11
   3 -14   2   -0.01    0.12
   3 -14   2    0.13    0.13
   3 -14   2   -0.02    0.13
   3 -14   2    0.05    0.11
  -4  14  -2   -0.10    0.11
   4 -14   2    0.14    0.14
   4 -14   2    0.04    0.13
   4 -14   2   -0.08    0.12
   4 -14   2    0.05    0.13
  -5  14  -2    4.13    0.41
   5 -14   2    3.76    0.45
   5 -14   2    4.60    0.48
   5 -14   2    4.61    0.47
  -6  14  -2    0.14    0.10
   6 -14   2    0.23    0.14
   6 -14   2   -0.04    0.12
   6 -14   2    0.09    0.13
  -7  14  -2    0.01    0.10
   7 -14   2    0.13    0.14
   7 -14   2   -0.10    0.12
   7 -14   2   -0.05    0.21
   7 -14   2    0.02    0.12
  -8  14  -2    0.30    0.11
   8 -14   2    0.19    0.20
   8 -14   2    0.09    0.13
   8 -14   2    0.27    0.14
   8 -14   2    0.59    0.16
   9 -14   2   -0.03    0.20
   9 -14   2    0.29    0.17
   9 -14   2   -0.01    0.14
 -10  14  -2    0.19    0.11
  10 -14   2   -0.26    0.15
  10 -14   2   -0.04    0.23
  10 -14   2    0.49    0.21
   9  13  -2    1.07    0.17
   9  13  -2    0.80    0.17
  -9 -13   2    0.82    0.18
   8  13  -2    0.11    0.14
   8  13  -2    0.19    0.12
  -8 -13   2    0.14    0.27
  -8 -13   2    0.23    0.14
   7  13  -2    0.25    0.14
   7  13  -2    0.22    0.11
  -7 -13   2    0.31    0.20
  -7 -13   2    0.15    0.14
   6  13  -2    0.97    0.15
   6  13  -2    0.76    0.17
  -6 -13   2    0.94    0.21
  -6 -13   2    1.15    0.19
  -6 -13   2    1.05    0.23
  -6 -13   2    0.76    0.17
   5  13  -2    0.31    0.14
   5  13  -2    0.16    0.10
  -5 -13   2    0.22    0.15
  -5 -13   2    0.20    0.16
  -5 -13   2    0.33    0.13
  -5 -13   2    0.06    0.12
   4  13  -2    0.41    0.14
   4  13  -2    0.26    0.11
  -4 -13   2    0.39    0.13
  -4 -13   2    0.10    0.10
  -4 -13   2    0.30    0.14
  -4 -13   2    0.49    0.16
  -3 -13   2    4.51    0.45
  -3 -13   2    4.89    0.50
  -3 -13   2    4.26    0.52
  -3 -13   2    5.16    0.49
   2  13  -2    0.11    0.14
   2  13  -2    0.28    0.10
  -2 -13   2    0.18    0.13
  -2 -13   2    0.28    0.13
  -2 -13   2    0.23    0.12
  -2 -13   2    0.25    0.12
   1  13  -2    0.25    0.15
   1  13  -2    0.20    0.09
  -1 -13   2    0.24    0.13
  -1 -13   2    0.27    0.12
  -1 -13   2    0.02    0.13
  -1 -13   2    0.07    0.11
   0  13  -2    1.78    0.23
   0  13  -2    1.70    0.20
   0 -13   2    2.09    0.30
   0 -13   2    1.81    0.23
   0 -13   2    1.55    0.25
   0 -13   2    1.26    0.20
   0 -13   2    1.83    0.24
  -1  13  -2    2.36    0.31
  -1  13  -2    1.79    0.23
   1 -13   2    1.63    0.26
   1 -13   2    2.46    0.29
   1 -13   2    2.52    0.30
   1 -13   2    2.15    0.25
  -2  13  -2    3.15    0.30
  -2  13  -2    2.51    0.37
   2 -13   2    2.39    0.34
   2 -13   2    3.18    0.31
   2 -13   2    3.15    0.34
   2 -13   2    2.85    0.32
  -3  13  -2    7.05    0.67
  -3  13  -2    7.21    0.72
   3 -13   2    7.41    0.73
   3 -13   2    7.88    0.77
   3 -13   2    7.89    0.73
  -4  13  -2    2.56    0.28
  -4  13  -2    2.81    0.38
  -5  13  -2    4.85    0.46
   5 -13   2    4.18    0.54
   5 -13   2    5.47    0.50
   5 -13   2    5.23    0.53
   5 -13   2    4.42    0.51
  -6  13  -2    3.48    0.42
  -6  13  -2    3.40    0.35
   6 -13   2    3.72    0.40
   6 -13   2    3.73    0.40
   6 -13   2    3.40    0.42
  -7  13  -2    0.40    0.20
  -7  13  -2    0.10    0.10
   7 -13   2    0.21    0.13
   7 -13   2    0.06    0.16
   7 -13   2    0.26    0.13
   7 -13   2    0.23    0.13
  -8  13  -2    0.14    0.11
  -8  13  -2    0.37    0.19
   8 -13   2    0.23    0.15
   8 -13   2    0.37    0.16
   8 -13   2    0.30    0.13
  -9  13  -2    0.17    0.10
  -9  13  -2    0.41    0.21
   9 -13   2    0.16    0.14
   9 -13   2    0.04    0.15
   9 -13   2    0.47    0.17
 -10  13  -2    0.49    0.21
  10 -13   2    0.47    0.20
 -11  13  -2    0.36    0.11
  11 -13   2    0.32    0.21
  10  12  -2    0.10    0.16
  10  12  -2    0.05    0.14
 -10 -12   2   -0.06    0.14
   9  12  -2    0.28    0.13
   9  12  -2    0.06    0.13
  -9 -12   2    0.16    0.14
   8  12  -2    0.65    0.13
   8  12  -2    0.75    0.15
  -8 -12   2    0.32    0.14
  -8 -12   2    0.54    0.16
  -8 -12   2    0.47    0.24
   7  12  -2   -0.01    0.10
   7  12  -2   -0.01    0.13
  -7 -12   2   -0.07    0.11
  -7 -12   2    0.01    0.12
  -7 -12   2   -0.03    0.17
  -7 -12   2   -0.27    0.15
   6  12  -2    0.20    0.13
   6  12  -2    0.19    0.10
  -6 -12   2    0.01    0.12
  -6 -12   2    0.17    0.16
  -6 -12   2    0.36    0.15
  -6 -12   2    0.29    0.13
  -6 -12   2    0.18    0.11
   5  12  -2    0.04    0.09
   5  12  -2    0.15    0.12
  -5 -12   2    0.05    0.14
  -5 -12   2    0.17    0.13
  -5 -12   2    0.01    0.11
  -5 -12   2    0.12    0.12
  -5 -12   2    0.01    0.11
   4  12  -2    0.35    0.14
   4  12  -2    0.37    0.10
  -4 -12   2    0.66    0.15
  -4 -12   2    0.59    0.14
  -4 -12   2    0.39    0.13
  -4 -12   2    0.52    0.14
  -4 -12   2    0.36    0.11
   3  12  -2    5.18    0.47
   3  12  -2    4.91    0.49
  -3 -12   2    5.20    0.47
  -3 -12   2    4.66    0.51
  -3 -12   2    5.65    0.52
  -3 -12   2    4.75    0.54
  -2 -12   2   13.93    1.30
  -2 -12   2   15.19    1.44
  -2 -12   2   16.35    1.42
  -2 -12   2   15.24    1.49
   1  12  -2    3.18    0.33
  -1 -12   2    3.61    0.33
  -1 -12   2    3.03    0.36
  -1 -12   2    3.70    0.37
  -1 -12   2    3.43    0.38
   0  12  -2    4.35    0.39
   0  12  -2    4.07    0.42
   0 -12   2    3.90    0.44
   0 -12   2    4.31    0.38
   0 -12   2    3.81    0.45
  -1  12  -2    0.13    0.14
  -1  12  -2   -0.03    0.08
   1 -12   2    0.06    0.11
   1 -12   2    0.05    0.11
   1 -12   2   -0.06    0.09
   1 -12   2   -0.02    0.07
  -2  12  -2    1.46    0.21
  -2  12  -2    1.32    0.17
   2 -12   2    1.72    0.20
   2 -12   2    0.96    0.18
   2 -12   2    1.31    0.19
   2 -12   2    1.43    0.22
   2 -12   2    1.88    0.23
  -3  12  -2    0.95    0.18
  -3  12  -2    0.61    0.13
   3 -12   2    0.86    0.16
   3 -12   2    0.71    0.16
   3 -12   2    0.94    0.15
   3 -12   2    0.86    0.14
  -4  12  -2    1.81    0.21
  -4  12  -2    1.38    0.24
   4 -12   2    1.71    0.22
   4 -12   2    1.43    0.24
   4 -12   2    2.01    0.25
   4 -12   2    2.12    0.29
   4 -12   2    1.94    0.24
  -5  12  -2    0.04    0.15
  -5  12  -2    0.04    0.09
   5 -12   2    0.13    0.11
   5 -12   2   -0.07    0.10
   5 -12   2   -0.03    0.10
   5 -12   2    0.00    0.12
   5 -12   2    0.31    0.15
   6 -12   2    0.81    0.17
   6 -12   2    0.96    0.16
   6 -12   2    0.85    0.17
  -7  12  -2    0.73    0.13
   7 -12   2    1.13    0.19
   7 -12   2    1.03    0.18
   7 -12   2    0.54    0.15
  -8  12  -2    0.53    0.16
  -8  12  -2    0.45    0.12
   8 -12   2    0.24    0.15
   8 -12   2    0.53    0.15
   8 -12   2    0.26    0.15
   8 -12   2    0.49    0.14
  -9  12  -2    4.51    0.44
  -9  12  -2    4.85    0.49
   9 -12   2    4.74    0.50
   9 -12   2    5.12    0.49
   9 -12   2    4.28    0.51
 -10  12  -2    1.33    0.19
 -10  12  -2    1.27    0.21
  10 -12   2    1.62    0.23
  10 -12   2    1.29    0.20
 -11  12  -2    0.79    0.19
  11 -12   2    0.82    0.17
  11 -12   2    0.93    0.20
  11 -12   2    0.82    0.31
  11  11  -2    0.18    0.14
 -11 -11   2   -0.04    0.15
  10  11  -2    0.40    0.16
  10  11  -2    0.46    0.14
 -10 -11   2    0.22    0.13
 -10 -11   2    0.28    0.14
   9  11  -2   -0.05    0.13
   9  11  -2   -0.07    0.12
  -9 -11   2    0.04    0.11
  -9 -11   2   -0.06    0.12
   8  11  -2    0.54    0.15
   8  11  -2    0.73    0.14
  -8 -11   2    0.85    0.17
  -8 -11   2    0.98    0.24
  -8 -11   2    0.71    0.14
   7  11  -2    0.07    0.12
   7  11  -2    0.09    0.10
  -7 -11   2   -0.03    0.16
  -7 -11   2    0.07    0.14
  -7 -11   2   -0.11    0.10
  -7 -11   2    0.04    0.10
   6  11  -2    0.57    0.12
  -6 -11   2    0.42    0.13
   5  11  -2   -0.05    0.08
   5  11  -2   -0.06    0.11
  -5 -11   2    0.17    0.13
  -5 -11   2    0.18    0.10
  -5 -11   2    0.00    0.09
  -5 -11   2    0.07    0.11
   4  11  -2    1.05    0.14
   4  11  -2    0.52    0.14
  -4 -11   2    0.92    0.16
  -4 -11   2    0.93    0.13
  -4 -11   2    0.84    0.13
  -4 -11   2    0.67    0.15
   3  11  -2    3.09    0.27
   3  11  -2    2.18    0.29
  -3 -11   2    2.68    0.28
  -3 -11   2    2.67    0.27
  -3 -11   2    2.25    0.30
  -3 -11   2    3.09    0.32
   2  11  -2    0.01    0.09
   2  11  -2    0.03    0.10
   2  11  -2    0.03    0.07
  -2 -11   2   -0.05    0.09
  -2 -11   2    0.14    0.11
  -2 -11   2    0.01    0.10
  -2 -11   2    0.21    0.08
  -2 -11   2    0.13    0.07
   1  11  -2    1.77    0.20
   1  11  -2    2.01    0.21
   1  11  -2    1.65    0.24
  -1 -11   2    2.04    0.28
  -1 -11   2    1.81    0.21
  -1 -11   2    2.29    0.25
  -1 -11   2    1.88    0.21
  -1 -11   2    1.76    0.24
  -1 -11   2    1.97    0.23
   0  11  -2    1.08    0.13
   0  11  -2    1.01    0.14
   0  11  -2    1.12    0.17
   0 -11   2    1.23    0.18
   0 -11   2    1.21    0.16
   0 -11   2    1.06    0.18
   0 -11   2    1.11    0.17
   0 -11   2    1.36    0.19
  -1  11  -2    3.91    0.35
  -1  11  -2    3.98    0.38
  -1  11  -2    3.46    0.33
   1 -11   2    4.06    0.39
   1 -11   2    3.52    0.35
   1 -11   2    3.72    0.39
  -2  11  -2    4.10    0.41
  -2  11  -2    3.86    0.35
   2 -11   2    4.04    0.43
   2 -11   2    4.39    0.42
   2 -11   2    3.94    0.38
  -3  11  -2    0.15    0.08
  -3  11  -2   -0.12    0.08
  -3  11  -2    0.11    0.12
   3 -11   2    0.09    0.08
   3 -11   2    0.03    0.08
   3 -11   2    0.04    0.14
   3 -11   2    0.15    0.09
   3 -11   2    0.01    0.10
   3 -11   2    0.04    0.08
  -4  11  -2    0.72    0.15
  -4  11  -2    0.60    0.11
   4 -11   2    0.72    0.15
   4 -11   2    0.61    0.12
   4 -11   2    0.77    0.13
   4 -11   2    0.61    0.15
  -5  11  -2    0.50    0.10
  -5  11  -2    0.69    0.15
   5 -11   2    0.20    0.12
   5 -11   2    0.34    0.12
   5 -11   2    0.31    0.11
   5 -11   2    0.13    0.09
   5 -11   2    0.47    0.13
  -6  11  -2    0.62    0.11
  -6  11  -2    0.64    0.16
   6 -11   2    0.49    0.12
   6 -11   2    0.33    0.13
   6 -11   2    0.59    0.14
   6 -11   2    0.42    0.13
  -8  11  -2    0.51    0.15
  -8  11  -2    0.60    0.12
   8 -11   2    0.54    0.15
   8 -11   2    0.30    0.14
   8 -11   2    0.43    0.15
   8 -11   2    0.19    0.13
  -9  11  -2    0.26    0.15
  -9  11  -2    0.31    0.10
   9 -11   2    0.51    0.16
   9 -11   2    0.35    0.15
   9 -11   2    0.38    0.16
 -10  11  -2    1.27    0.20
 -10  11  -2    0.92    0.16
  10 -11   2    1.62    0.23
  10 -11   2    1.47    0.21
 -11  11  -2    0.06    0.10
  11 -11   2   -0.09    0.12
  11 -11   2   -0.23    0.28
 -12  11  -2    0.23    0.14
 -12  11  -2    0.02    0.11
  12 -11   2   -0.01    0.13
  11  10  -2    0.88    0.16
 -11 -10   2    0.65    0.14
 -11 -10   2    0.85    0.17
  10  10  -2   -0.19    0.14
  10  10  -2    0.19    0.13
 -10 -10   2    0.21    0.12
   9  10  -2   -0.04    0.11
   9  10  -2   -0.15    0.11
  -9 -10   2   -0.05    0.11
   8  10  -2    3.28    0.34
   8  10  -2    3.04    0.35
  -8 -10   2    3.19    0.41
  -8 -10   2    3.41    0.35
   7  10  -2    0.99    0.14
   7  10  -2    1.04    0.16
  -7 -10   2    0.65    0.14
   6  10  -2    2.66    0.28
   6  10  -2    2.86    0.30
  -6 -10   2    2.36    0.29
  -6 -10   2    2.95    0.34
  -6 -10   2    2.64    0.29
   5  10  -2   -0.13    0.09
   5  10  -2    0.07    0.07
  -5 -10   2    0.00    0.08
  -5 -10   2    0.02    0.10
  -5 -10   2    0.13    0.11
   4  10  -2   10.33    0.81
  -4 -10   2    9.03    0.84
  -4 -10   2    9.16    0.88
  -4 -10   2    9.40    0.93
  -4 -10   2   10.50    0.96
   3  10  -2    0.33    0.08
   3  10  -2    0.05    0.07
   3  10  -2    0.04    0.09
  -3 -10   2    0.08    0.07
  -3 -10   2    0.13    0.09
  -3 -10   2    0.08    0.07
  -3 -10   2    0.20    0.07
  -2 -10   2    4.25    0.41
  -2 -10   2    5.04    0.46
  -2 -10   2    4.30    0.39
  -2 -10   2    3.95    0.44
   1  10  -2    0.27    0.06
   1  10  -2    0.34    0.11
   1  10  -2    0.43    0.08
  -1 -10   2    0.30    0.10
  -1 -10   2    0.22    0.11
  -1 -10   2    0.37    0.07
  -1 -10   2    0.24    0.09
   0  10  -2    0.47    0.07
   0  10  -2    0.55    0.10
   0 -10   2    0.46    0.12
   0 -10   2    0.54    0.10
   0 -10   2    0.60    0.16
   0 -10   2    0.52    0.10
   0 -10   2    0.53    0.10
   0 -10   2    0.45    0.11
  -1  10  -2    1.49    0.16
  -1  10  -2    1.56    0.19
   1 -10   2    2.01    0.19
   1 -10   2    1.62    0.19
   1 -10   2    1.91    0.22
   1 -10   2    1.64    0.21
   1 -10   2    1.76    0.21
  -2  10  -2    0.05    0.05
  -2  10  -2    0.01    0.08
   2 -10   2    0.11    0.06
   2 -10   2   -0.06    0.08
   2 -10   2    0.01    0.09
   2 -10   2    0.07    0.09
   2 -10   2    0.33    0.14
   2 -10   2   -0.01    0.09
   2 -10   2   -0.04    0.08
  -3  10  -2    2.24    0.25
  -3  10  -2    1.95    0.20
  -3  10  -2    2.04    0.23
   3 -10   2    2.20    0.27
   3 -10   2    2.34    0.26
   3 -10   2    2.58    0.28
   3 -10   2    2.22    0.24
   3 -10   2    2.26    0.24
  -4  10  -2    0.38    0.12
  -4  10  -2    0.38    0.07
  -4  10  -2    0.22    0.08
   4 -10   2    0.27    0.11
   4 -10   2    0.54    0.12
   4 -10   2    0.29    0.10
   4 -10   2    0.44    0.12
   4 -10   2    0.50    0.08
   4 -10   2    0.17    0.08
  -5  10  -2    1.98    0.26
  -5  10  -2    2.11    0.23
   5 -10   2    2.13    0.26
   5 -10   2    2.31    0.26
   5 -10   2    1.92    0.23
   5 -10   2    2.26    0.26
   5 -10   2    2.32    0.26
  -6  10  -2    0.42    0.09
  -6  10  -2    0.37    0.13
   6 -10   2    0.22    0.10
   6 -10   2    0.24    0.13
   6 -10   2    0.63    0.13
   6 -10   2    0.24    0.11
   6 -10   2    0.41    0.12
  -7  10  -2    1.73    0.18
   7 -10   2    1.22    0.18
   7 -10   2    1.47    0.22
   7 -10   2    1.70    0.23
   7 -10   2    1.34    0.21
   7 -10   2    1.66    0.23
  -8  10  -2    0.12    0.10
   8 -10   2    0.27    0.13
   8 -10   2    0.34    0.12
   8 -10   2    0.19    0.12
  -9  10  -2    5.09    0.53
  -9  10  -2    6.05    0.56
   9 -10   2    6.34    0.58
   9 -10   2    6.37    0.60
   9 -10   2    5.10    0.59
 -10  10  -2    2.36    0.29
  10 -10   2    1.98    0.29
  10 -10   2    2.25    0.32
  10 -10   2    2.21    0.29
 -11  10  -2    2.23    0.27
 -11  10  -2    2.59    0.30
  11 -10   2    2.38    0.35
  11 -10   2    2.74    0.32
 -12  10  -2   -0.03    0.11
 -12  10  -2   -0.02    0.13
  12 -10   2   -0.04    0.13
  12   9  -2    2.28    0.30
 -12  -9   2    2.49    0.30
 -12  -9   2    2.25    0.29
  11   9  -2    2.57    0.33
  11   9  -2    3.35    0.41
 -11  -9   2    2.91    0.32
  10   9  -2    0.13    0.13
  10   9  -2    0.05    0.31
  10   9  -2    0.20    0.14
 -10  -9   2    0.35    0.12
   9   9  -2   -0.15    0.25
   9   9  -2    0.20    0.12
   9   9  -2    0.16    0.11
  -9  -9   2    0.23    0.23
  -9  -9   2    0.18    0.10
   8   9  -2    0.69    0.15
   8   9  -2    0.99    0.15
  -8  -9   2    0.92    0.14
   7   9  -2    1.22    0.17
   7   9  -2    1.24    0.16
  -7  -9   2    0.90    0.20
  -7  -9   2    0.99    0.15
  -7  -9   2    0.90    0.17
   6   9  -2    0.07    0.07
   6   9  -2    0.06    0.09
  -6  -9   2    0.01    0.08
  -6  -9   2   -0.15    0.12
  -6  -9   2    0.10    0.10
   5   9  -2    2.27    0.27
   5   9  -2    2.39    0.25
   5   9  -2    2.43    0.25
  -5  -9   2    2.25    0.30
  -5  -9   2    2.62    0.26
  -5  -9   2    2.72    0.26
   4   9  -2    0.43    0.10
   4   9  -2    0.55    0.08
   4   9  -2    0.24    0.08
  -4  -9   2    0.39    0.08
  -4  -9   2    0.45    0.12
  -4  -9   2    0.46    0.10
   3   9  -2   21.77    1.85
   3   9  -2   22.31    2.00
   3   9  -2   23.16    1.95
  -3  -9   2   23.01    2.11
   2   9  -2    2.76    0.27
  -2  -9   2    2.78    0.25
  -2  -9   2    2.22    0.28
  -2  -9   2    2.34    0.28
   1   9  -2    5.54    0.47
  -1  -9   2    5.83    0.54
  -1  -9   2    4.73    0.48
  -1  -9   2    5.32    0.46
  -1  -9   2    4.82    0.51
   0   9  -2    2.35    0.26
   0  -9   2    3.11    0.27
   0  -9   2    3.04    0.28
   0  -9   2    2.52    0.27
   0  -9   2    2.42    0.30
  -1   9  -2    1.25    0.17
  -1   9  -2    1.44    0.19
  -1   9  -2    1.41    0.17
   1  -9   2    1.38    0.16
   1  -9   2    1.69    0.17
   1  -9   2    1.33    0.19
   1  -9   2    1.52    0.20
  -2   9  -2   17.40    1.47
   2  -9   2   15.79    1.61
   2  -9   2   16.14    1.49
   2  -9   2   16.01    1.53
   2  -9   2   17.46    1.56
  -3   9  -2    0.13    0.04
  -3   9  -2    0.07    0.10
   3  -9   2    0.13    0.06
   3  -9   2    0.09    0.09
   3  -9   2    0.10    0.07
   3  -9   2    0.21    0.09
   3  -9   2    0.05    0.06
   3  -9   2    0.17    0.08
  -4   9  -2    0.81    0.11
  -4   9  -2    1.18    0.15
  -4   9  -2    0.76    0.11
   4  -9   2    0.99    0.13
   4  -9   2    0.87    0.14
   4  -9   2    1.02    0.15
   4  -9   2    0.69    0.13
   4  -9   2    0.95    0.14
  -5   9  -2    0.07    0.11
  -5   9  -2    0.03    0.06
  -5   9  -2    0.04    0.07
   5  -9   2    0.00    0.09
   5  -9   2    0.00    0.07
   5  -9   2    0.15    0.07
   5  -9   2    0.15    0.09
   5  -9   2   -0.01    0.10
  -6   9  -2    1.65    0.21
  -6   9  -2    1.14    0.16
   6  -9   2    1.32    0.19
   6  -9   2    1.48    0.18
   6  -9   2    1.44    0.18
   6  -9   2    1.60    0.20
  -7   9  -2    2.48    0.26
  -7   9  -2    2.87    0.29
   7  -9   2    2.32    0.30
   7  -9   2    2.64    0.28
   7  -9   2    2.25    0.29
  -8   9  -2    0.08    0.12
  -8   9  -2    0.15    0.09
   8  -9   2    0.04    0.12
   8  -9   2    0.10    0.10
   8  -9   2    0.03    0.11
   8  -9   2   -0.01    0.11
  -9   9  -2   -0.08    0.09
  -9   9  -2    0.09    0.12
   9  -9   2   -0.12    0.11
   9  -9   2    0.07    0.13
   9  -9   2    0.21    0.15
 -10   9  -2    4.33    0.46
 -10   9  -2    4.50    0.44
  10  -9   2    4.77    0.49
  10  -9   2    5.54    0.52
  10  -9   2    4.00    0.49
  10  -9   2    4.90    0.46
 -11   9  -2   -0.05    0.13
 -11   9  -2    0.16    0.10
  11  -9   2    0.08    0.26
  11  -9   2   -0.02    0.12
  11  -9   2    0.24    0.14
  11  -9   2   -0.12    0.18
 -12   9  -2    0.32    0.13
 -12   9  -2    0.23    0.11
  12  -9   2    0.40    0.13
  13  -9   2    1.52    0.24
  12   8  -2    3.62    0.56
  12   8  -2    3.94    0.45
 -12  -8   2    4.66    0.43
  11   8  -2    0.71    0.22
  11   8  -2    0.09    0.12
  11   8  -2   -0.52    0.22
 -11  -8   2   -0.05    0.10
  10   8  -2    0.13    0.21
  10   8  -2    0.07    0.12
  10   8  -2    0.00    0.13
 -10  -8   2    0.04    0.11
   9   8  -2    0.78    0.14
   9   8  -2    1.16    0.23
   9   8  -2    0.87    0.16
  -9  -8   2    0.58    0.23
  -9  -8   2    0.57    0.13
   8   8  -2    0.14    0.09
   8   8  -2    0.15    0.18
   8   8  -2    0.20    0.11
  -8  -8   2    0.07    0.10
  -8  -8   2    0.01    0.18
  -8  -8   2    0.10    0.17
   7   8  -2    0.15    0.11
   7   8  -2    0.29    0.09
   7   8  -2    0.15    0.18
  -7  -8   2    0.01    0.12
  -7  -8   2    0.00    0.08
  -7  -8   2    0.16    0.13
   6   8  -2    0.70    0.14
   6   8  -2    0.35    0.18
   6   8  -2    0.59    0.10
   6   8  -2    0.74    0.12
  -6  -8   2    0.66    0.13
  -6  -8   2    0.72    0.15
   5   8  -2    0.05    0.08
   5   8  -2    0.10    0.07
   5   8  -2   -0.06    0.06
  -5  -8   2    0.18    0.10
  -5  -8   2   -0.05    0.06
  -5  -8   2    0.01    0.10
   4   8  -2    0.25    0.09
   4   8  -2    0.14    0.06
   4   8  -2    0.25    0.06
  -4  -8   2    0.05    0.10
  -4  -8   2    0.13    0.09
  -4  -8   2    0.19    0.06
   3   8  -2    0.35    0.12
   3   8  -2    0.42    0.07
   3   8  -2    0.43    0.06
  -3  -8   2    0.27    0.07
  -3  -8   2    0.20    0.08
  -3  -8   2    0.22    0.10
  -3  -8   2    0.35    0.09
   2   8  -2    2.16    0.20
   2   8  -2    1.75    0.18
  -2  -8   2    2.24    0.20
   1   8  -2  120.35   10.35
  -1  -8   2  134.27   12.21
  -1  -8   2  128.15   12.10
   0   8  -2    6.17    0.55
   0   8  -2    6.76    0.56
   0  -8   2    6.58    0.58
   0  -8   2    7.24    0.66
  -1   8  -2   10.71    0.82
  -1   8  -2   10.13    0.90
   1  -8   2   10.30    0.99
   1  -8   2    9.54    0.82
   1  -8   2    9.37    0.95
   1  -8   2   10.09    0.85
  -2   8  -2    2.30    0.23
  -2   8  -2    1.92    0.21
   2  -8   2    2.23    0.25
   2  -8   2    1.76    0.21
   2  -8   2    2.10    0.18
  -3   8  -2    0.07    0.06
  -3   8  -2    0.13    0.08
  -3   8  -2    0.21    0.04
  -3   8  -2    0.24    0.09
   3  -8   2    0.23    0.06
   3  -8   2    0.15    0.08
   3  -8   2    0.18    0.06
   3  -8   2    0.17    0.09
   3  -8   2    0.31    0.09
   3  -8   2    0.08    0.08
  -4   8  -2    0.46    0.10
  -4   8  -2    0.70    0.13
  -4   8  -2    0.30    0.06
   4  -8   2    0.47    0.10
   4  -8   2    0.25    0.08
   4  -8   2    0.40    0.10
   4  -8   2    0.44    0.09
   4  -8   2    0.34    0.07
  -5   8  -2    5.07    0.44
  -5   8  -2    4.90    0.49
  -5   8  -2    4.67    0.46
   5  -8   2    5.29    0.51
   5  -8   2    5.73    0.50
   5  -8   2    5.48    0.50
   5  -8   2    5.14    0.48
  -6   8  -2   -0.09    0.07
  -6   8  -2    0.12    0.10
  -6   8  -2    0.05    0.06
   6  -8   2    0.23    0.07
   6  -8   2    0.05    0.09
   6  -8   2   -0.07    0.08
   6  -8   2   -0.03    0.09
   7  -8   2    4.79    0.47
   7  -8   2    5.20    0.50
  -8   8  -2   -0.05    0.10
  -8   8  -2    0.22    0.08
   8  -8   2    0.03    0.12
   8  -8   2    0.17    0.10
   8  -8   2    0.02    0.11
   9  -8   2    1.33    0.21
 -10   8  -2   15.67    1.37
 -11   8  -2    0.06    0.12
 -11   8  -2    0.16    0.10
  11  -8   2   -0.24    0.19
  11  -8   2    0.03    0.12
  11  -8   2    0.20    0.13
 -12   8  -2   -0.03    0.11
 -12   8  -2   -0.18    0.11
  12  -8   2    0.00    0.13
  13  -8   2    0.13    0.13
  13   7  -2    0.17    0.24
  13   7  -2    0.22    0.17
 -13  -7   2   -0.09    0.12
  12   7  -2    1.26    0.25
  12   7  -2    1.12    0.20
 -12  -7   2    1.44    0.19
  11   7  -2    0.22    0.20
  11   7  -2    0.09    0.17
  11   7  -2    0.04    0.14
 -11  -7   2    0.04    0.11
  10   7  -2    0.35    0.17
  10   7  -2    0.19    0.13
  10   7  -2    0.18    0.14
 -10  -7   2    0.46    0.13
   9   7  -2    1.10    0.17
  -9  -7   2    0.86    0.16
  -9  -7   2    1.20    0.24
   8   7  -2    0.24    0.09
   8   7  -2    0.37    0.10
   8   7  -2    0.11    0.16
  -8  -7   2    0.14    0.17
  -8  -7   2    0.13    0.10
   7   7  -2   -0.09    0.15
   7   7  -2    0.23    0.15
   7   7  -2    0.04    0.09
   7   7  -2    0.09    0.07
  -7  -7   2    0.11    0.14
  -7  -7   2    0.08    0.13
  -7  -7   2    0.23    0.13
  -7  -7   2    0.20    0.09
   6   7  -2    1.74    0.23
   6   7  -2    2.31    0.27
   6   7  -2    1.75    0.23
  -6  -7   2    2.07    0.26
  -6  -7   2    1.83    0.26
  -6  -7   2    2.33    0.22
  -6  -7   2    2.08    0.23
   5   7  -2    0.68    0.10
   5   7  -2    0.43    0.16
   5   7  -2    0.53    0.08
   5   7  -2    0.44    0.08
  -5  -7   2    0.53    0.11
  -5  -7   2    0.57    0.10
  -5  -7   2    0.55    0.12
   4   7  -2    0.51    0.08
   4   7  -2    0.57    0.07
   4   7  -2    0.33    0.14
   4   7  -2    0.45    0.14
   4   7  -2    0.49    0.09
  -4  -7   2    0.55    0.10
  -4  -7   2    0.51    0.10
  -4  -7   2    0.51    0.10
  -4  -7   2    0.36    0.07
   3   7  -2    0.86    0.13
   3   7  -2    0.69    0.12
   3   7  -2    1.00    0.10
   3   7  -2    0.72    0.11
  -3  -7   2    1.10    0.12
  -3  -7   2    0.68    0.10
  -3  -7   2    0.94    0.11
  -3  -7   2    0.96    0.14
   2   7  -2    6.42    0.53
  -2  -7   2    6.28    0.55
  -2  -7   2    6.39    0.53
  -1  -7   2   11.06    0.91
   0   7  -2    1.63    0.18
   0   7  -2    1.65    0.15
   0  -7   2    1.53    0.15
   0  -7   2    1.92    0.15
   0  -7   2    1.68    0.21
  -1   7  -2    0.25    0.07
  -1   7  -2    0.36    0.09
  -1   7  -2    0.16    0.03
  -1   7  -2    0.22    0.05
   1  -7   2    0.10    0.04
   1  -7   2    0.17    0.06
   1  -7   2    0.12    0.07
   1  -7   2    0.38    0.09
  -2   7  -2   11.09    1.02
  -2   7  -2   11.67    1.04
   2  -7   2   11.85    1.06
   2  -7   2   12.13    0.96
  -3   7  -2    7.34    0.63
  -3   7  -2    7.68    0.59
   3  -7   2    6.62    0.67
   3  -7   2    7.35    0.62
   3  -7   2    7.25    0.59
   3  -7   2    6.64    0.69
  -4   7  -2    1.30    0.14
  -4   7  -2    1.72    0.18
  -4   7  -2    1.35    0.16
   4  -7   2    1.63    0.18
   4  -7   2    1.68    0.16
   4  -7   2    1.29    0.17
   4  -7   2    1.43    0.16
  -5   7  -2    0.87    0.11
  -5   7  -2    0.86    0.10
   5  -7   2    0.83    0.12
   5  -7   2    0.62    0.10
   5  -7   2    0.87    0.12
   5  -7   2    0.71    0.13
  -6   7  -2    4.13    0.41
  -6   7  -2    4.28    0.37
   6  -7   2    4.21    0.40
   6  -7   2    4.26    0.42
  -7   7  -2    0.70    0.13
  -7   7  -2    0.91    0.14
  -7   7  -2    0.97    0.13
   7  -7   2    1.07    0.16
   7  -7   2    0.91    0.16
   7  -7   2    1.34    0.17
   7  -7   2    1.04    0.14
  -8   7  -2    0.55    0.10
  -8   7  -2    0.31    0.11
   8  -7   2    0.49    0.14
   8  -7   2    0.36    0.14
   8  -7   2    0.59    0.11
  -9   7  -2    3.26    0.31
  -9   7  -2    3.13    0.33
   9  -7   2    2.63    0.35
 -10   7  -2    0.69    0.15
 -10   7  -2    0.34    0.11
  10  -7   2    0.44    0.17
  10  -7   2    0.54    0.20
  10  -7   2    0.49    0.13
 -11   7  -2    0.16    0.11
 -11   7  -2    0.18    0.11
  11  -7   2    0.24    0.12
  11  -7   2   -0.23    0.22
 -12   7  -2   -0.08    0.11
  12  -7   2    0.13    0.12
  12  -7   2    0.06    0.12
  13  -7   2   -0.15    0.13
  13  -7   2   -0.04    0.14
  13   6  -2    0.20    0.16
  13   6  -2    0.09    0.18
 -13  -6   2    0.30    0.12
  12   6  -2    1.27    0.23
  12   6  -2    1.47    0.21
 -12  -6   2    1.66    0.23
  11   6  -2    1.23    0.20
  11   6  -2    1.08    0.19
 -11  -6   2    1.28    0.19
  10   6  -2    0.33    0.14
  10   6  -2    0.58    0.15
  10   6  -2    0.71    0.18
 -10  -6   2    0.78    0.19
 -10  -6   2    0.43    0.13
   9   6  -2    0.48    0.12
   9   6  -2    0.66    0.16
   9   6  -2    0.55    0.14
  -9  -6   2    0.62    0.20
  -9  -6   2    0.32    0.11
  -9  -6   2    0.42    0.15
   8   6  -2    0.46    0.23
   8   6  -2    0.10    0.09
   8   6  -2   -0.14    0.17
   8   6  -2    0.10    0.12
   8   6  -2   -0.07    0.10
  -8  -6   2   -0.12    0.11
  -8  -6   2   -0.15    0.15
  -8  -6   2    0.07    0.09
   7   6  -2    4.29    0.42
   7   6  -2    4.94    0.43
   7   6  -2    4.37    0.40
  -7  -6   2    4.21    0.42
  -7  -6   2    4.39    0.47
  -7  -6   2    4.43    0.43
  -7  -6   2    4.03    0.42
   6   6  -2    0.06    0.08
   6   6  -2   -0.20    0.11
   6   6  -2    0.15    0.06
   6   6  -2   -0.01    0.07
  -6  -6   2    0.08    0.09
  -6  -6   2   -0.08    0.10
  -6  -6   2   -0.05    0.09
  -6  -6   2   -0.08    0.07
   5   6  -2    0.18    0.06
   5   6  -2    0.39    0.08
   5   6  -2    0.30    0.10
   5   6  -2    0.22    0.06
   5   6  -2    0.43    0.17
  -5  -6   2    0.32    0.09
  -5  -6   2    0.17    0.07
  -5  -6   2    0.17    0.10
   4   6  -2    3.27    0.32
   4   6  -2    3.53    0.33
  -4  -6   2    3.39    0.37
  -4  -6   2    3.73    0.31
   3   6  -2    2.24    0.22
  -3  -6   2    2.37    0.21
  -3  -6   2    2.33    0.22
   2   6  -2    8.05    0.65
   2   6  -2    7.75    0.69
  -2  -6   2    7.63    0.68
  -2  -6   2    8.14    0.78
  -1  -6   2   15.64    1.60
  -1  -6   2   17.62    1.50
   0   6  -2    0.02    0.02
   0   6  -2    0.05    0.03
   0  -6   2   -0.02    0.03
   0  -6   2    0.06    0.05
   0  -6   2    0.00    0.05
   0  -6   2    0.05    0.04
   0  -6   2    0.04    0.07
   0  -6   2   -0.01    0.02
   1  -6   2   10.37    0.91
   1  -6   2   10.79    0.97
   1  -6   2   10.91    0.88
   2  -6   2    1.64    0.16
   2  -6   2    1.92    0.19
   2  -6   2    1.83    0.19
   2  -6   2    1.82    0.16
  -3   6  -2    2.98    0.27
  -3   6  -2    3.29    0.26
  -3   6  -2    2.92    0.25
   3  -6   2    3.11    0.31
   3  -6   2    2.62    0.28
  -4   6  -2    0.50    0.06
  -4   6  -2    0.54    0.09
   4  -6   2    0.38    0.07
   4  -6   2    0.48    0.09
   4  -6   2    0.44    0.08
  -5   6  -2    0.14    0.04
  -5   6  -2    0.02    0.11
  -5   6  -2    0.24    0.08
   5  -6   2    0.17    0.08
   5  -6   2    0.08    0.08
   5  -6   2    0.16    0.08
   5  -6   2    0.11    0.07
   5  -6   2    0.16    0.06
  -6   6  -2    1.48    0.17
  -6   6  -2    1.10    0.14
  -6   6  -2    1.47    0.14
   6  -6   2    1.23    0.16
   6  -6   2    1.32    0.17
   6  -6   2    1.14    0.17
  -7   6  -2    2.96    0.40
  -7   6  -2    2.85    0.30
  -7   6  -2    2.78    0.28
   7  -6   2    2.73    0.32
   7  -6   2    3.35    0.31
  -8   6  -2    1.76    0.20
  -8   6  -2    1.39    0.26
  -8   6  -2    1.32    0.20
   8  -6   2    1.41    0.19
   8  -6   2    1.46    0.22
   8  -6   2    1.62    0.21
  -9   6  -2    0.00    0.21
  -9   6  -2    0.13    0.11
  -9   6  -2    0.13    0.08
   9  -6   2    0.21    0.11
   9  -6   2    0.11    0.15
   9  -6   2    0.29    0.15
 -10   6  -2   14.27    1.21
  10  -6   2   13.09    1.26
 -11   6  -2    1.93    0.26
 -11   6  -2    2.14    0.25
  11  -6   2    2.21    0.27
 -12   6  -2    0.86    0.16
 -12   6  -2    0.54    0.15
  12  -6   2    0.88    0.15
  12  -6   2    0.73    0.16
 -13   6  -2   -0.19    0.18
  13  -6   2    0.42    0.14
  13   5  -2    2.69    0.36
  13   5  -2    2.63    0.38
 -13  -5   2    2.83    0.32
  12   5  -2   -0.10    0.14
  12   5  -2    0.00    0.14
 -12  -5   2    0.32    0.20
 -12  -5   2    0.04    0.12
  11   5  -2    0.00    0.14
  11   5  -2   -0.10    0.15
 -11  -5   2    0.03    0.12
 -11  -5   2    0.46    0.16
  10   5  -2    0.15    0.12
  10   5  -2    0.27    0.16
 -10  -5   2    0.43    0.12
   9   5  -2    2.16    0.27
   9   5  -2    2.73    0.28
  -9  -5   2    2.06    0.28
  -9  -5   2    2.45    0.33
  -9  -5   2    2.66    0.28
   8   5  -2    0.18    0.08
   8   5  -2   -0.13    0.10
   8   5  -2   -0.04    0.10
   8   5  -2    0.36    0.17
  -8  -5   2   -0.03    0.10
  -8  -5   2   -0.09    0.14
  -8  -5   2    0.24    0.09
   7   5  -2    2.29    0.27
   7   5  -2    2.35    0.28
   7   5  -2    2.50    0.28
   7   5  -2    2.70    0.25
  -7  -5   2    2.70    0.27
  -7  -5   2    2.30    0.27
   6   5  -2    0.22    0.11
   6   5  -2    0.41    0.09
   6   5  -2    0.34    0.07
   6   5  -2    0.46    0.09
  -6  -5   2    0.21    0.11
  -6  -5   2    0.39    0.08
  -6  -5   2    0.32    0.10
  -6  -5   2    0.46    0.10
  -6  -5   2    0.53    0.11
   5   5  -2    1.21    0.15
   5   5  -2    1.71    0.20
  -5  -5   2    1.65    0.17
  -5  -5   2    1.49    0.16
  -5  -5   2    1.22    0.19
   4   5  -2    1.22    0.15
   4   5  -2    1.35    0.20
   4   5  -2    1.62    0.16
   4   5  -2    1.49    0.14
  -4  -5   2    1.46    0.17
  -4  -5   2    1.54    0.17
  -4  -5   2    1.82    0.19
  -4  -5   2    1.47    0.15
   3   5  -2    8.97    0.78
   3   5  -2    9.90    0.78
  -3  -5   2    9.56    0.78
  -3  -5   2    9.59    0.81
  -2  -5   2   60.09    4.80
  -2  -5   2   59.03    5.27
  -2  -5   2   58.05    4.80
   1   5  -2    1.60    0.16
  -1  -5   2    2.00    0.18
  -1  -5   2    1.87    0.15
   0  -5   2   41.33    3.36
  -1   5  -2   14.65    1.20
   2  -5   2   21.55    2.00
   2  -5   2   21.19    1.69
   2  -5   2   19.76    1.69
  -3   5  -2   34.86    2.84
  -4   5  -2    3.50    0.34
   4  -5   2    3.80    0.37
   4  -5   2    3.96    0.37
  -5   5  -2    0.09    0.05
  -5   5  -2    0.11    0.08
  -5   5  -2    0.02    0.13
  -5   5  -2    0.13    0.06
  -5   5  -2    0.00    0.09
   5  -5   2    0.02    0.07
   5  -5   2    0.24    0.13
   5  -5   2    0.23    0.07
   5  -5   2    0.27    0.06
  -6   5  -2    0.02    0.07
  -6   5  -2    0.01    0.05
  -6   5  -2   -0.20    0.10
   6  -5   2    0.05    0.07
   6  -5   2    0.10    0.07
   6  -5   2    0.29    0.13
   6  -5   2   -0.08    0.08
   6  -5   2    0.05    0.07
   6  -5   2    0.00    0.07
   6  -5   2   -0.10    0.10
  -7   5  -2    0.92    0.11
  -7   5  -2    0.87    0.12
  -7   5  -2    0.73    0.11
   7  -5   2    0.75    0.13
   7  -5   2    0.48    0.11
   7  -5   2    0.79    0.17
   7  -5   2    0.57    0.10
  -8   5  -2    0.37    0.09
  -8   5  -2    0.32    0.17
  -8   5  -2    0.29    0.14
  -8   5  -2    0.38    0.10
   8  -5   2    0.44    0.13
   8  -5   2    0.42    0.13
   8  -5   2    0.40    0.14
   8  -5   2    0.49    0.10
  -9   5  -2    2.00    0.22
  -9   5  -2    2.36    0.25
  -9   5  -2    2.21    0.31
   9  -5   2    2.41    0.28
   9  -5   2    1.59    0.24
   9  -5   2    1.97    0.27
 -10   5  -2    5.35    0.55
  10  -5   2    4.59    0.56
 -11   5  -2    0.58    0.14
 -11   5  -2    0.49    0.24
 -11   5  -2    0.41    0.13
  11  -5   2    0.49    0.14
 -12   5  -2    4.57    0.42
 -12   5  -2    3.56    0.49
  12  -5   2    3.66    0.42
  13  -5   2    0.10    0.12
  13  -5   2   -0.17    0.13
 -14   5  -2    0.12    0.14
  14  -5   2    0.24    0.16
  14  -5   2   -0.13    0.18
  14   4  -2   -0.16    0.16
 -14  -4   2    0.45    0.15
  13   4  -2    0.11    0.14
  13   4  -2    0.04    0.20
 -13  -4   2    0.30    0.21
 -13  -4   2    0.21    0.14
  12   4  -2    0.33    0.14
  12   4  -2    0.11    0.15
 -12  -4   2    0.35    0.14
 -12  -4   2    0.40    0.16
  11   4  -2    3.94    0.45
 -11  -4   2    4.88    0.46
 -11  -4   2    4.33    0.45
  10   4  -2   -0.22    0.16
  10   4  -2    0.09    0.12
  10   4  -2    0.16    0.13
 -10  -4   2    0.29    0.12
 -10  -4   2    0.06    0.13
   9   4  -2    0.08    0.10
   9   4  -2   -0.05    0.20
   9   4  -2    0.09    0.11
   9   4  -2    0.01    0.11
  -9  -4   2   -0.01    0.09
  -9  -4   2    0.16    0.12
  -9  -4   2    0.15    0.19
   8   4  -2    1.21    0.17
   8   4  -2    1.54    0.20
   8   4  -2    1.51    0.20
   8   4  -2    1.24    0.18
   8   4  -2    1.44    0.22
  -8  -4   2    1.25    0.19
  -8  -4   2    1.60    0.22
  -8  -4   2    1.29    0.19
   7   4  -2    1.30    0.18
   7   4  -2    1.22    0.16
   7   4  -2    1.47    0.18
   7   4  -2    1.15    0.14
  -7  -4   2    1.20    0.17
  -7  -4   2    1.10    0.16
  -7  -4   2    1.04    0.14
  -7  -4   2    1.16    0.16
  -7  -4   2    0.86    0.18
   6   4  -2    0.57    0.09
   6   4  -2    0.56    0.18
   6   4  -2    0.38    0.09
   6   4  -2    0.62    0.09
  -6  -4   2    0.77    0.11
  -6  -4   2    0.62    0.10
  -6  -4   2    0.78    0.13
  -6  -4   2    0.46    0.10
  -6  -4   2    0.88    0.13
   5   4  -2    0.15    0.09
   5   4  -2    0.13    0.04
   5   4  -2    0.23    0.09
  -5  -4   2   -0.01    0.09
  -5  -4   2    0.21    0.10
  -5  -4   2    0.04    0.06
  -5  -4   2    0.24    0.06
  -5  -4   2    0.09    0.08
   4   4  -2    6.04    0.55
   4   4  -2    5.98    0.49
  -4  -4   2    5.66    0.49
  -4  -4   2    5.75    0.51
  -4  -4   2    5.99    0.49
   3   4  -2    2.51    0.22
   3   4  -2    2.79    0.22
  -3  -4   2    2.38    0.22
   1   4  -2    5.41    0.45
  -1  -4   2    5.39    0.45
   0   4  -2 1000.00   79.01
   0  -4   2  947.97   79.00
  -3   4  -2    1.26    0.10
  -3   4  -2    1.18    0.11
  -3   4  -2    0.90    0.12
   3  -4   2    1.00    0.11
   3  -4   2    1.20    0.14
   3  -4   2    0.98    0.10
  -4   4  -2    3.88    0.36
  -4   4  -2    3.77    0.34
   4  -4   2    3.96    0.37
   4  -4   2    3.48    0.32
  -5   4  -2    0.61    0.08
  -5   4  -2    0.92    0.15
   5  -4   2    0.64    0.09
   5  -4   2    0.80    0.11
   5  -4   2    0.82    0.12
  -6   4  -2    6.38    0.56
   6  -4   2    6.19    0.60
   6  -4   2    6.58    0.60
   6  -4   2    6.06    0.59
  -7   4  -2    0.39    0.09
  -7   4  -2    0.42    0.08
  -7   4  -2    0.52    0.10
   7  -4   2    0.44    0.11
   7  -4   2    0.50    0.12
   7  -4   2    0.33    0.08
   7  -4   2    0.41    0.12
  -8   4  -2    1.62    0.17
  -8   4  -2    1.42    0.20
  -8   4  -2    1.28    0.20
  -8   4  -2    1.23    0.19
   8  -4   2    1.66    0.24
   8  -4   2    1.79    0.23
   8  -4   2    1.12    0.20
   8  -4   2    1.54    0.19
   8  -4   2    1.76    0.25
  -9   4  -2    0.15    0.08
  -9   4  -2    0.21    0.11
  -9   4  -2    0.15    0.13
   9  -4   2    0.18    0.17
   9  -4   2    0.09    0.10
   9  -4   2   -0.09    0.16
   9  -4   2    0.20    0.17
 -10   4  -2    1.01    0.21
 -10   4  -2    1.13    0.16
  10  -4   2    1.32    0.18
 -11   4  -2   10.55    0.96
 -11   4  -2   11.50    1.01
 -11   4  -2   10.01    0.94
  11  -4   2   10.34    0.98
 -12   4  -2   -0.41    0.21
 -12   4  -2   -0.07    0.11
  12  -4   2    0.05    0.12
 -13   4  -2   -0.10    0.27
  13  -4   2    0.10    0.12
  13  -4   2   -0.25    0.16
 -14   4  -2    0.14    0.15
  14  -4   2   -0.01    0.15
  14   3  -2    0.32    0.15
 -14  -3   2    0.12    0.15
  13   3  -2    0.06    0.13
 -13  -3   2    0.44    0.18
 -13  -3   2   -0.02    0.14
  12   3  -2    2.06    0.30
  12   3  -2    1.83    0.30
 -12  -3   2    2.94    0.31
  11   3  -2    2.05    0.28
  11   3  -2    1.98    0.28
 -11  -3   2    2.42    0.30
  10   3  -2    0.23    0.12
  10   3  -2   -0.09    0.11
 -10  -3   2   -0.01    0.12
 -10  -3   2    0.04    0.12
   9   3  -2   -0.06    0.10
   9   3  -2    0.01    0.10
   9   3  -2   -0.16    0.11
   9   3  -2    0.03    0.16
  -9  -3   2    0.00    0.12
  -9  -3   2   -0.02    0.10
  -9  -3   2    0.08    0.10
   8   3  -2   -0.01    0.10
   8   3  -2   -0.04    0.07
   8   3  -2    0.02    0.13
   8   3  -2    0.09    0.08
   8   3  -2    0.11    0.09
  -8  -3   2    0.05    0.14
  -8  -3   2    0.07    0.06
  -8  -3   2    0.00    0.08
  -8  -3   2    0.12    0.09
   7   3  -2    5.90    0.55
  -7  -3   2    5.11    0.52
   6   3  -2    4.05    0.38
   6   3  -2    4.96    0.43
   6   3  -2    4.32    0.43
  -6  -3   2    4.69    0.43
   5   3  -2    0.13    0.04
   5   3  -2    0.02    0.07
   5   3  -2    0.03    0.07
  -5  -3   2    0.04    0.05
  -5  -3   2    0.15    0.06
  -5  -3   2   -0.03    0.05
  -5  -3   2    0.04    0.06
   4   3  -2    6.10    0.55
   4   3  -2    6.04    0.57
  -4  -3   2    6.75    0.57
   3   3  -2    0.85    0.09
   3   3  -2    0.85    0.08
   2   3  -2   19.00    1.57
  -2  -3   2   19.57    1.57
   1   3  -2    2.71    0.23
   0   3  -2   66.27    5.45
   0   3  -2   70.35    5.45
   0  -3   2   63.37    5.45
   0  -3   2   68.52    5.45
  -1   3  -2    1.09    0.10
   1  -3   2    1.15    0.10
   1  -3   2    0.98    0.10
   2  -3   2   11.66    1.13
   2  -3   2   12.17    0.97
  -3   3  -2    2.15    0.18
  -3   3  -2    2.02    0.18
  -3   3  -2    1.87    0.21
   3  -3   2    2.27    0.21
  -4   3  -2   10.90    0.93
   4  -3   2   10.44    1.01
  -5   3  -2    1.27    0.12
  -5   3  -2    1.12    0.16
  -5   3  -2    1.17    0.14
   5  -3   2    1.05    0.14
   5  -3   2    1.21    0.15
   5  -3   2    1.31    0.16
  -6   3  -2    2.85    0.28
  -6   3  -2    3.61    0.33
  -6   3  -2    3.04    0.28
  -6   3  -2    3.18    0.30
   6  -3   2    3.09    0.31
   6  -3   2    2.94    0.31
  -7   3  -2    8.43    0.71
  -7   3  -2    7.83    0.78
  -7   3  -2    8.01    0.73
   7  -3   2    9.11    0.77
  -8   3  -2    0.11    0.07
  -8   3  -2   -0.02    0.12
  -8   3  -2   -0.07    0.11
  -8   3  -2    0.07    0.06
   8  -3   2   -0.03    0.08
   8  -3   2   -0.08    0.12
   8  -3   2   -0.15    0.14
   8  -3   2   -0.03    0.13
   8  -3   2    0.00    0.10
  -9   3  -2    1.03    0.28
  -9   3  -2    1.73    0.20
  -9   3  -2    1.06    0.19
  -9   3  -2    1.19    0.17
   9  -3   2    1.46    0.21
   9  -3   2    1.43    0.20
 -10   3  -2    1.04    0.23
 -10   3  -2    1.49    0.20
 -10   3  -2    1.55    0.22
  10  -3   2    1.64    0.24
  10  -3   2    1.56    0.23
 -11   3  -2    1.84    0.24
 -11   3  -2    1.68    0.27
  11  -3   2    1.85    0.26
 -12   3  -2   -0.31    0.18
 -12   3  -2   -0.21    0.18
 -12   3  -2    0.11    0.13
  12  -3   2    0.05    0.12
  13  -3   2    0.04    0.12
  13  -3   2    0.15    0.16
 -14   3  -2    0.58    0.17
  14   2  -2    0.95    0.18
 -14  -2   2    0.82    0.18
 -14  -2   2    0.94    0.20
  13   2  -2    0.22    0.13
 -13  -2   2    0.28    0.15
 -13  -2   2    0.32    0.16
  12   2  -2    3.98    0.45
  12   2  -2    4.30    0.44
 -12  -2   2    4.50    0.46
 -12  -2   2    3.83    0.43
  11   2  -2   -0.10    0.13
  11   2  -2    0.04    0.12
 -11  -2   2    0.17    0.13
 -11  -2   2    0.09    0.14
  10   2  -2    2.51    0.28
  10   2  -2    1.97    0.26
 -10  -2   2    2.45    0.29
 -10  -2   2    1.62    0.26
   9   2  -2    0.13    0.08
   9   2  -2    0.12    0.14
   9   2  -2    0.14    0.11
   9   2  -2   -0.02    0.15
  -9  -2   2    0.36    0.22
  -9  -2   2    0.09    0.09
  -9  -2   2    0.09    0.11
   8   2  -2    1.97    0.25
   8   2  -2    1.76    0.25
   8   2  -2    1.86    0.24
   8   2  -2    1.99    0.23
  -8  -2   2    2.59    0.26
  -8  -2   2    2.39    0.26
  -8  -2   2    2.52    0.23
   7   2  -2    1.80    0.17
   7   2  -2    1.31    0.19
   7   2  -2    1.47    0.18
   7   2  -2    1.78    0.18
  -7  -2   2    1.41    0.18
  -7  -2   2    1.31    0.19
  -7  -2   2    1.16    0.16
   6   2  -2    0.73    0.11
   6   2  -2    0.79    0.12
   6   2  -2    0.73    0.10
  -6  -2   2    0.93    0.14
  -6  -2   2    0.87    0.13
  -6  -2   2    0.92    0.12
   5   2  -2    0.34    0.06
   5   2  -2    0.28    0.07
   5   2  -2    0.20    0.06
   5   2  -2    0.05    0.08
  -5  -2   2    0.39    0.08
  -5  -2   2    0.14    0.05
  -5  -2   2    0.17    0.05
  -5  -2   2    0.22    0.07
   4   2  -2    0.76    0.10
   4   2  -2    0.80    0.08
   4   2  -2    0.68    0.08
   4   2  -2    0.63    0.10
   4   2  -2    0.72    0.10
  -4  -2   2    0.84    0.09
  -4  -2   2    0.59    0.09
   3   2  -2    1.76    0.17
   3   2  -2    2.18    0.17
   2   2  -2   24.20    1.97
   1   2  -2   45.30    3.52
  -1  -2   2   41.54    3.52
  -1   2  -2    7.29    0.58
   1  -2   2    6.74    0.58
   1  -2   2    7.24    0.58
  -2   2  -2    3.18    0.29
  -2   2  -2    2.76    0.26
   2  -2   2    3.00    0.29
   2  -2   2    2.93    0.25
  -4   2  -2    0.32    0.07
  -4   2  -2    0.41    0.07
   4  -2   2    0.38    0.07
   4  -2   2    0.56    0.06
   4  -2   2    0.51    0.07
   4  -2   2    0.50    0.09
   4  -2   2    0.42    0.06
  -5   2  -2    1.94    0.18
  -5   2  -2    1.70    0.18
  -5   2  -2    1.50    0.15
   5  -2   2    1.39    0.18
   5  -2   2    1.43    0.17
   5  -2   2    1.40    0.18
  -6   2  -2    8.83    0.72
  -6   2  -2    8.63    0.76
  -6   2  -2    7.90    0.75
  -6   2  -2    7.86    0.68
   6  -2   2    8.15    0.77
  -7   2  -2    0.58    0.12
  -7   2  -2    0.54    0.09
  -7   2  -2    0.46    0.10
  -7   2  -2    0.86    0.11
   7  -2   2    0.80    0.11
   7  -2   2    0.49    0.15
   7  -2   2    0.59    0.12
   7  -2   2    0.75    0.15
   7  -2   2    0.58    0.09
   7  -2   2    0.56    0.11
  -8   2  -2    0.53    0.10
  -8   2  -2    0.59    0.11
  -8   2  -2    0.81    0.14
   8  -2   2    0.89    0.14
  -9   2  -2    0.13    0.12
  -9   2  -2    0.01    0.09
  -9   2  -2    0.12    0.08
  -9   2  -2   -0.29    0.25
   9  -2   2    0.08    0.12
   9  -2   2    0.06    0.10
 -10   2  -2    1.09    0.15
 -10   2  -2    0.74    0.17
 -10   2  -2    1.25    0.17
  10  -2   2    0.88    0.17
  10  -2   2    1.28    0.20
 -11   2  -2    0.90    0.17
 -11   2  -2    1.48    0.21
  11  -2   2    0.92    0.18
  11  -2   2    1.03    0.21
  12  -2   2    1.33    0.20
 -13   2  -2    2.58    0.29
 -13   2  -2    2.38    0.31
  13  -2   2    1.93    0.29
 -14   2  -2   -0.08    0.17
 -14   2  -2    0.40    0.22
  14  -2   2   -0.30    0.14
  14   1  -2    0.45    0.15
 -14  -1   2    0.68    0.19
 -14  -1   2    0.46    0.17
  13   1  -2    0.09    0.12
 -13  -1   2   -0.20    0.13
 -13  -1   2    0.12    0.16
  12   1  -2    3.34    0.42
  12   1  -2    2.96    0.36
 -12  -1   2    3.71    0.37
  11   1  -2    7.94    0.68
 -11  -1   2    7.44    0.69
 -11  -1   2    6.69    0.64
 -11  -1   2    6.08    0.65
  10   1  -2    1.17    0.18
  10   1  -2    1.05    0.18
  10   1  -2    0.70    0.15
 -10  -1   2    0.74    0.17
 -10  -1   2    0.89    0.14
   9   1  -2    0.16    0.12
   9   1  -2    0.22    0.08
   9   1  -2    0.41    0.14
  -9  -1   2    0.31    0.18
  -9  -1   2    0.33    0.09
  -9  -1   2    0.30    0.12
   8   1  -2    5.22    0.52
   8   1  -2    5.63    0.52
   8   1  -2    5.63    0.55
   7   1  -2    4.02    0.40
   7   1  -2    4.22    0.39
   6   1  -2    0.58    0.09
   6   1  -2    0.41    0.07
   6   1  -2    0.39    0.09
  -6  -1   2    0.54    0.11
  -6  -1   2    0.52    0.07
  -6  -1   2    0.39    0.07
   5   1  -2    0.67    0.10
   5   1  -2    0.77    0.09
   5   1  -2    0.70    0.08
   5   1  -2    0.80    0.11
  -5  -1   2    0.44    0.08
  -5  -1   2    0.69    0.11
  -5  -1   2    0.55    0.09
  -5  -1   2    0.59    0.08
   4   1  -2    0.70    0.07
   4   1  -2    0.63    0.09
   4   1  -2    0.60    0.07
  -4  -1   2    0.62    0.08
  -4  -1   2    0.40    0.07
  -4  -1   2    0.58    0.07
   3   1  -2    0.18    0.03
  -3  -1   2    0.12    0.03
  -3  -1   2    0.04    0.04
   2   1  -2    0.89    0.08
   2   1  -2    0.99    0.09
  -2  -1   2    0.78    0.08
   1   1  -2    0.35    0.04
  -1  -1   2    0.38    0.04
   0   1  -2    8.18    0.69
   0  -1   2    8.87    0.69
  -1   1  -2    0.94    0.10
   1  -1   2    1.12    0.09
  -2   1  -2    2.97    0.23
  -2   1  -2    2.79    0.24
   2  -1   2    2.66    0.27
   2  -1   2    2.79    0.24
  -3   1  -2    5.47    0.45
  -5   1  -2    0.21    0.08
  -5   1  -2    0.10    0.05
  -5   1  -2    0.12    0.06
   5  -1   2    0.09    0.06
   5  -1   2    0.03    0.05
   5  -1   2    0.05    0.06
   5  -1   2    0.19    0.07
  -6   1  -2    0.21    0.15
  -6   1  -2    0.14    0.07
  -6   1  -2    0.19    0.06
   6  -1   2    0.26    0.06
   6  -1   2    0.22    0.08
   6  -1   2    0.26    0.12
  -7   1  -2    0.70    0.11
  -7   1  -2    0.81    0.12
   7  -1   2    0.64    0.12
   7  -1   2    1.03    0.13
   7  -1   2    0.85    0.12
  -8   1  -2    2.59    0.24
  -8   1  -2    1.74    0.25
  -8   1  -2    2.40    0.25
  -8   1  -2    1.82    0.25
   8  -1   2    2.27    0.26
   8  -1   2    2.62    0.28
   8  -1   2    2.01    0.24
  -9   1  -2    0.18    0.09
  -9   1  -2    0.70    0.12
  -9   1  -2    0.44    0.13
   9  -1   2    0.35    0.12
   9  -1   2    0.33    0.12
 -10   1  -2    0.05    0.11
 -10   1  -2    0.08    0.10
  10  -1   2    0.03    0.11
  10  -1   2    0.07    0.12
 -11   1  -2    0.12    0.15
 -11   1  -2    0.15    0.12
  11  -1   2    0.08    0.12
  11  -1   2    0.08    0.16
 -12   1  -2   -0.11    0.16
  12  -1   2   -0.34    0.21
  12  -1   2   -0.09    0.11
 -13   1  -2    1.59    0.26
 -13   1  -2    2.12    0.26
  13  -1   2    1.88    0.31
  13  -1   2    2.14    0.27
  14  -1   2    0.93    0.18
 -14   0   2    0.09    0.15
 -14   0   2    0.43    0.22
  13   0  -2    0.17    0.12
 -13   0   2    0.54    0.19
 -13   0   2    0.00    0.13
  12   0  -2    1.59    0.23
  12   0  -2    1.30    0.27
 -12   0   2    1.61    0.22
 -12   0   2    1.98    0.24
 -12   0   2    1.29    0.25
  11   0  -2    5.54    0.55
  10   0  -2   14.33    1.30
   9   0  -2    0.33    0.14
   9   0  -2    0.16    0.10
   9   0  -2    0.24    0.13
  -9   0   2    0.36    0.13
  -9   0   2    0.34    0.10
  -9   0   2    0.33    0.16
   8   0  -2    0.38    0.11
   8   0  -2   -0.11    0.12
  -8   0   2    0.24    0.09
  -8   0   2    0.13    0.09
   7   0  -2    1.87    0.22
   7   0  -2    1.82    0.21
   7   0  -2    1.88    0.22
   7   0  -2    2.24    0.26
  -7   0   2    1.89    0.20
  -7   0   2    2.20    0.21
  -7   0   2    2.49    0.24
  -7   0   2    1.67    0.25
   6   0  -2   12.76    1.06
  -6   0   2   13.23    1.06
  -6   0   2   12.40    1.17
   5   0  -2   10.77    0.92
   5   0  -2   11.50    1.07
   4   0  -2   23.58    2.19
  -4   0   2   22.45    1.99
   3   0  -2  181.76   15.50
   3   0  -2  179.35   18.11
   3   0  -2  189.81   15.49
  -3   0   2  201.44   15.49
  -3   0   2  202.35   15.51
   2   0  -2    0.41    0.05
   2   0  -2    0.38    0.05
  -2   0   2    0.40    0.05
  -2   0   2    0.52    0.05
   1   0  -2   30.25    2.73
  -1   0   2   27.44    2.34
   0   0   2    0.01    0.01
   0   0   2    0.01    0.01
  -1   0  -2   57.19    4.83
   1   0   2   57.93    4.83
   1   0   2   63.31    4.83
   2   0   2    1.40    0.14
   2   0   2    1.39    0.13
   2   0   2    1.49    0.13
  -3   0  -2    0.47    0.07
  -3   0  -2    0.47    0.05
   3   0   2    0.62    0.06
   3   0   2    0.55    0.07
   3   0   2    0.49    0.06
  -4   0  -2   15.54    1.39
  -4   0  -2   15.87    1.26
   4   0   2   16.00    1.34
   4   0   2   14.31    1.26
  -5   0  -2   -0.02    0.08
  -5   0  -2    0.13    0.06
  -5   0  -2    0.16    0.06
  -5   0  -2    0.01    0.05
   5   0   2    0.07    0.08
   5   0   2    0.16    0.05
   5   0   2    0.17    0.06
   5   0   2    0.11    0.04
  -6   0  -2    4.72    0.39
  -6   0  -2    4.21    0.42
   6   0   2    4.11    0.39
   6   0   2    4.75    0.41
  -7   0  -2    1.26    0.18
  -7   0  -2    1.46    0.19
  -7   0  -2    1.56    0.19
  -7   0  -2    1.43    0.17
   7   0   2    1.31    0.17
   7   0   2    1.69    0.19
   7   0   2    1.37    0.18
   7   0   2    1.46    0.18
   7   0   2    1.80    0.19
  -8   0  -2    2.12    0.23
  -8   0  -2    2.21    0.29
  -8   0  -2    2.57    0.24
   8   0   2    1.71    0.24
   8   0   2    2.35    0.24
   8   0   2    1.65    0.24
   8   0   2    2.14    0.24
  -9   0  -2    0.88    0.15
  -9   0  -2    1.03    0.15
   9   0   2    0.68    0.14
   9   0   2    0.51    0.16
   9   0   2    0.85    0.16
  10   0   2    4.71    0.48
  10   0   2    4.72    0.48
 -11   0  -2   -0.14    0.12
  11   0   2    0.16    0.13
  11   0   2    0.18    0.14
 -12   0  -2    0.03    0.14
 -12   0  -2    0.20    0.15
  12   0   2    0.10    0.13
  12   0   2   -0.25    0.17
 -13   0  -2    0.28    0.16
  13   0   2    0.22    0.14
  14   0   2    0.15    0.16
 -14   1   2   -0.01    0.13
 -14   1   2    0.13    0.26
  13  -1  -2    0.13    0.23
  13  -1  -2    0.17    0.11
 -13   1   2    0.22    0.14
 -13   1   2    0.09    0.19
  12  -1  -2    0.31    0.18
  12  -1  -2    0.74    0.14
 -12   1   2    0.60    0.15
 -12   1   2    0.49    0.14
 -12   1   2    0.53    0.20
  11  -1  -2    2.60    0.27
 -11   1   2    1.87    0.25
  10  -1  -2    1.25    0.26
   9  -1  -2    5.05    0.52
   9  -1  -2    5.99    0.54
  -9   1   2    5.36    0.55
  -9   1   2    5.91    0.52
   8  -1  -2    1.37    0.18
   8  -1  -2    1.40    0.19
   8  -1  -2    1.25    0.18
  -8   1   2    0.98    0.15
  -8   1   2    1.63    0.17
  -8   1   2    1.41    0.18
  -8   1   2    1.40    0.17
   7  -1  -2    1.78    0.20
   7  -1  -2    2.11    0.20
  -7   1   2    1.58    0.18
  -7   1   2    1.65    0.19
   6  -1  -2    9.03    0.77
   6  -1  -2    8.14    0.79
   6  -1  -2    8.70    0.83
  -6   1   2    7.79    0.77
  -6   1   2    8.67    0.80
  -6   1   2    9.15    0.72
   5  -1  -2    0.92    0.12
   5  -1  -2    0.62    0.08
  -5   1   2    0.67    0.09
  -5   1   2    0.58    0.09
  -5   1   2    0.79    0.10
  -5   1   2    0.70    0.08
   4  -1  -2    5.43    0.50
   4  -1  -2    5.16    0.48
   4  -1  -2    5.23    0.44
  -3   1   2   18.46    1.50
   2  -1  -2    9.60    0.80
  -2   1   2    9.56    0.80
  -2   1   2   10.38    0.80
   1  -1  -2    1.28    0.10
   1  -1  -2    1.23    0.10
  -1   1   2    1.29    0.11
   0  -1  -2    0.56    0.05
   0  -1  -2    0.60    0.05
   0  -1  -2    0.52    0.06
   0   1   2    0.56    0.06
   0   1   2    0.57    0.05
   0   1   2    0.63    0.05
   1   1   2  104.57    8.19
   1   1   2  100.93    8.19
   1   1   2   97.00    9.55
  -2  -1  -2   36.32    2.82
  -2  -1  -2   33.02    2.82
   3   1   2   90.30    8.55
  -4  -1  -2    1.08    0.10
  -4  -1  -2    0.76    0.12
  -4  -1  -2    0.83    0.10
   4   1   2    1.04    0.10
   4   1   2    0.89    0.10
   4   1   2    0.62    0.13
  -5  -1  -2   57.07    4.67
  -5  -1  -2   55.53    4.68
   5   1   2   59.71    4.67
  -6  -1  -2    3.01    0.27
  -6  -1  -2    2.56    0.35
   6   1   2    2.91    0.27
   6   1   2    3.26    0.30
  -7  -1  -2    8.22    0.78
   7   1   2    8.39    0.77
   7   1   2    8.61    0.82
  -8  -1  -2    8.85    0.76
  -8  -1  -2    7.67    0.74
   8   1   2    8.25    0.74
   8   1   2    7.12    0.73
  -9  -1  -2    1.66    0.25
  -9  -1  -2    1.85    0.26
   9   1   2    2.61    0.26
   9   1   2    2.58    0.27
   9   1   2    2.08    0.25
  10   1   2    0.14    0.14
 -11  -1  -2   -0.15    0.12
 -11  -1  -2    0.23    0.14
  11   1   2    0.01    0.14
  11   1   2    0.18    0.13
 -12  -1  -2    1.99    0.30
 -12  -1  -2    2.37    0.33
  12   1   2    2.55    0.31
  12   1   2    2.18    0.29
 -13  -1  -2    0.28    0.22
 -13  -1  -2    0.24    0.14
  13   1   2    0.43    0.14
  13   1   2    0.02    0.21
  13  -2  -2   -0.03    0.18
  13  -2  -2   -0.01    0.11
 -13   2   2    0.75    0.27
 -13   2   2    0.01    0.12
 -13   2   2   -0.08    0.15
  12  -2  -2    0.42    0.17
 -12   2   2    0.96    0.26
 -12   2   2    0.49    0.13
  11  -2  -2   23.92    2.26
  10  -2  -2   22.94    2.33
  10  -2  -2   26.35    2.39
  10  -2  -2   23.96    2.23
 -10   2   2   25.83    2.19
   9  -2  -2    1.25    0.21
  -9   2   2    1.64    0.17
  -9   2   2    1.11    0.22
   8  -2  -2    0.99    0.17
   8  -2  -2    0.69    0.11
   8  -2  -2    0.73    0.13
   8  -2  -2    1.01    0.15
  -8   2   2    0.84    0.13
  -8   2   2    0.69    0.18
  -8   2   2    0.70    0.12
   7  -2  -2    0.16    0.07
   7  -2  -2    0.01    0.09
   7  -2  -2    0.15    0.10
   7  -2  -2    0.18    0.07
   7  -2  -2    0.18    0.13
   7  -2  -2    0.13    0.08
  -7   2   2    0.05    0.07
  -7   2   2    0.09    0.06
  -7   2   2    0.31    0.16
  -7   2   2    0.21    0.05
  -7   2   2    0.06    0.10
   6  -2  -2    7.60    0.74
   6  -2  -2    7.50    0.70
  -6   2   2    7.90    0.64
  -6   2   2    7.61    0.67
   5  -2  -2    6.58    0.58
   5  -2  -2    6.06    0.59
  -5   2   2    6.29    0.57
   4  -2  -2    1.84    0.18
   4  -2  -2    1.56    0.15
   4  -2  -2    1.90    0.19
   4  -2  -2    1.59    0.19
   4  -2  -2    1.62    0.17
  -4   2   2    1.84    0.15
   3  -2  -2    9.09    0.76
  -3   2   2    9.54    0.76
   2  -2  -2   16.87    1.40
   2  -2  -2   17.01    1.40
  -2   2   2   17.74    1.40
   1  -2  -2    0.08    0.03
  -1   2   2    0.12    0.03
  -1   2   2    0.06    0.01
   0  -2  -2    6.63    0.61
   0   2   2    6.01    0.52
   0   2   2    6.54    0.61
  -1  -2  -2   71.37    5.60
   1   2   2   66.26    5.60
   1   2   2   69.58    5.60
  -2  -2  -2  496.98   39.47
   2   2   2  475.44   39.47
  -3  -2  -2    8.06    0.72
   3   2   2    7.65    0.71
   3   2   2    7.87    0.69
   3   2   2    8.01    0.65
  -4  -2  -2    1.19    0.12
  -4  -2  -2    1.38    0.14
  -4  -2  -2    0.93    0.13
  -4  -2  -2    0.94    0.15
   4   2   2    1.34    0.14
   4   2   2    1.09    0.12
   4   2   2    1.02    0.15
   4   2   2    1.20    0.11
   4   2   2    0.89    0.13
  -5  -2  -2    1.93    0.18
  -5  -2  -2    1.74    0.21
   5   2   2    1.99    0.18
   5   2   2    2.08    0.20
   5   2   2    1.85    0.22
   5   2   2    1.71    0.19
  -6  -2  -2    6.08    0.59
  -6  -2  -2    6.74    0.56
  -6  -2  -2    6.52    0.62
  -6  -2  -2    6.55    0.67
   6   2   2    7.54    0.64
   6   2   2    6.72    0.59
  -7  -2  -2    5.05    0.46
   7   2   2    4.43    0.43
  -8  -2  -2    0.42    0.11
  -8  -2  -2    0.36    0.11
   8   2   2    0.38    0.10
   8   2   2    0.73    0.19
   8   2   2    0.45    0.12
   8   2   2    0.36    0.09
  -9  -2  -2    1.02    0.16
   9   2   2    1.31    0.19
   9   2   2    0.73    0.16
   9   2   2    0.99    0.15
 -10  -2  -2    0.55    0.14
  10   2   2    0.52    0.14
 -11  -2  -2    1.43    0.24
 -11  -2  -2    2.06    0.27
  11   2   2    1.95    0.28
  11   2   2    1.68    0.24
 -12  -2  -2    1.37    0.24
 -12  -2  -2    1.36    0.20
  12   2   2    1.04    0.21
  12   2   2    1.41    0.22
  13   2   2    0.14    0.16
  13   2   2   -0.09    0.19
  14  -3  -2   -0.62    0.23
  14  -3  -2    0.22    0.13
 -14   3   2    0.20    0.13
  13  -3  -2    0.58    0.19
  13  -3  -2    0.84    0.15
 -13   3   2    0.97    0.16
 -13   3   2    0.53    0.16
  12  -3  -2    1.74    0.24
  12  -3  -2    1.63    0.24
  11  -3  -2    4.01    0.38
  11  -3  -2    3.69    0.40
 -11   3   2    3.13    0.35
 -11   3   2    3.55    0.37
  10  -3  -2   10.32    1.00
  10  -3  -2   11.43    1.05
 -10   3   2   10.81    1.05
   9  -3  -2    0.33    0.14
   9  -3  -2    0.09    0.12
   9  -3  -2    0.07    0.10
   9  -3  -2    0.12    0.09
  -9   3   2    0.56    0.19
  -9   3   2   -0.23    0.13
  -9   3   2   -0.04    0.09
  -9   3   2    0.02    0.07
   8  -3  -2    0.77    0.13
   8  -3  -2    0.61    0.11
   8  -3  -2    0.40    0.14
   8  -3  -2    0.70    0.11
  -8   3   2    0.87    0.11
  -8   3   2    0.62    0.11
  -8   3   2    1.04    0.21
   7  -3  -2    0.25    0.11
   7  -3  -2    0.46    0.10
   7  -3  -2    0.70    0.10
   7  -3  -2    0.62    0.09
  -7   3   2    0.47    0.09
  -7   3   2    0.49    0.07
  -7   3   2    0.54    0.18
   6  -3  -2    3.35    0.31
   6  -3  -2    3.36    0.31
   6  -3  -2    2.90    0.29
  -6   3   2    2.93    0.26
  -6   3   2    3.13    0.28
  -6   3   2    3.23    0.29
  -6   3   2    2.61    0.29
   5  -3  -2    0.74    0.11
   5  -3  -2    0.92    0.11
   5  -3  -2    0.96    0.11
   5  -3  -2    0.82    0.12
  -5   3   2    0.85    0.12
  -5   3   2    0.62    0.09
  -5   3   2    0.64    0.08
  -5   3   2    0.65    0.09
   4  -3  -2    0.14    0.02
   4  -3  -2   -0.03    0.07
   4  -3  -2    0.07    0.05
   4  -3  -2    0.12    0.05
   4  -3  -2    0.11    0.07
   4  -3  -2    0.07    0.03
   4  -3  -2    0.07    0.05
  -4   3   2    0.07    0.03
  -4   3   2    0.07    0.03
   3  -3  -2    0.65    0.10
   3  -3  -2    0.61    0.10
   3  -3  -2    0.75    0.11
   3  -3  -2    0.72    0.06
  -3   3   2    0.74    0.07
  -3   3   2    0.68    0.07
  -3   3   2    0.80    0.10
  -2   3   2   33.58    2.80
  -2   3   2   35.38    3.27
   0   3   2    1.09    0.09
   0   3   2    1.05    0.09
  -1  -3  -2    3.22    0.28
  -1  -3  -2    3.49    0.28
   1   3   2    3.41    0.28
   1   3   2    3.37    0.33
   1   3   2    3.63    0.28
  -2  -3  -2   24.06    1.99
  -2  -3  -2   25.03    2.05
  -2  -3  -2   24.08    2.33
  -2  -3  -2   23.56    2.34
  -2  -3  -2   24.04    1.99
   2   3   2   26.18    1.99
   2   3   2   23.98    2.32
  -3  -3  -2   11.60    0.99
   3   3   2   12.11    0.99
   3   3   2   12.98    1.07
   3   3   2   11.73    1.05
  -4  -3  -2    8.12    0.73
  -4  -3  -2    7.84    0.61
  -4  -3  -2    6.79    0.67
   4   3   2    7.21    0.67
   4   3   2    6.97    0.62
  -5  -3  -2    1.00    0.13
  -5  -3  -2    0.77    0.13
  -5  -3  -2    1.08    0.14
   5   3   2    0.80    0.15
   5   3   2    0.99    0.12
   5   3   2    0.98    0.15
   5   3   2    0.77    0.11
  -6  -3  -2   -0.24    0.11
  -6  -3  -2    0.08    0.07
  -6  -3  -2    0.19    0.10
  -6  -3  -2   -0.10    0.09
   6   3   2    0.13    0.06
   6   3   2    0.12    0.06
   6   3   2   -0.08    0.10
   6   3   2   -0.06    0.07
  -7  -3  -2    0.05    0.06
  -7  -3  -2   -0.01    0.13
   7   3   2    0.06    0.09
   7   3   2   -0.14    0.11
   7   3   2    0.04    0.09
   7   3   2    0.06    0.07
  -8  -3  -2    1.43    0.20
   8   3   2    2.03    0.26
   8   3   2    1.45    0.21
  -9  -3  -2   -0.13    0.13
  -9  -3  -2    0.01    0.09
   9   3   2    0.08    0.14
   9   3   2   -0.02    0.11
   9   3   2    0.16    0.10
 -10  -3  -2    0.43    0.13
 -10  -3  -2    0.59    0.18
  10   3   2    0.21    0.15
  10   3   2    0.59    0.17
  10   3   2    0.26    0.13
 -11  -3  -2    0.37    0.14
 -11  -3  -2    0.38    0.21
 -11  -3  -2    0.11    0.20
  11   3   2   -0.04    0.13
  11   3   2    0.22    0.15
 -12  -3  -2    0.57    0.15
  12   3   2    0.57    0.18
  12   3   2    0.40    0.16
 -13  -3  -2    0.20    0.13
  13   3   2    0.45    0.18
  13   3   2    0.19    0.17
  14  -4  -2   -0.10    0.14
  14  -4  -2    0.20    0.21
 -14   4   2    0.02    0.18
 -14   4   2    0.11    0.13
  13  -4  -2    1.24    0.20
  13  -4  -2    1.20    0.17
 -13   4   2    1.00    0.16
 -13   4   2    1.11    0.18
  12  -4  -2    1.90    0.24
  12  -4  -2    1.51    0.24
  11  -4  -2    3.61    0.39
 -11   4   2    3.33    0.37
 -11   4   2    3.26    0.34
  10  -4  -2    2.34    0.32
  10  -4  -2    2.56    0.29
  10  -4  -2    2.46    0.33
  10  -4  -2    2.88    0.31
 -10   4   2    2.82    0.27
 -10   4   2    2.55    0.30
   9  -4  -2   17.81    1.62
   9  -4  -2   16.85    1.67
   9  -4  -2   16.94    1.60
  -9   4   2   18.92    1.54
   8  -4  -2    0.60    0.12
   8  -4  -2    0.78    0.12
   8  -4  -2    0.58    0.13
  -8   4   2    0.79    0.12
  -8   4   2    0.87    0.11
  -8   4   2    0.72    0.10
   7  -4  -2    1.18    0.17
  -7   4   2    1.40    0.13
  -7   4   2    1.38    0.17
  -7   4   2    1.03    0.14
   6  -4  -2    0.54    0.08
   6  -4  -2    0.67    0.09
   6  -4  -2    0.49    0.10
   6  -4  -2    0.33    0.09
  -6   4   2    0.38    0.08
  -6   4   2    0.60    0.11
  -6   4   2    0.53    0.07
  -6   4   2    0.53    0.10
   5  -4  -2    9.04    0.71
   5  -4  -2    7.75    0.79
   5  -4  -2    9.15    0.84
   5  -4  -2    8.88    0.78
   5  -4  -2    8.29    0.83
  -5   4   2    8.16    0.75
   4  -4  -2    6.82    0.60
   4  -4  -2    6.51    0.64
  -4   4   2    6.40    0.54
   3  -4  -2   17.61    1.56
   3  -4  -2   16.27    1.53
   3  -4  -2   16.17    1.56
  -3   4   2   16.32    1.35
  -3   4   2   16.85    1.35
  -2   4   2    9.66    0.77
  -2   4   2    9.24    0.91
  -2   4   2    9.35    0.77
  -1   4   2   61.85    5.02
   0   4   2   44.85    3.64
  -1  -4  -2    0.07    0.04
  -1  -4  -2    0.03    0.01
  -1  -4  -2    0.01    0.01
  -1  -4  -2    0.03    0.07
  -1  -4  -2    0.09    0.05
  -1  -4  -2    0.09    0.09
   1   4   2    0.05    0.04
   1   4   2    0.05    0.02
   1   4   2    0.06    0.02
  -2  -4  -2   14.74    1.39
  -2  -4  -2   14.53    1.18
  -2  -4  -2   14.02    1.18
   2   4   2   14.65    1.18
   2   4   2   14.64    1.38
  -3  -4  -2    1.62    0.20
  -3  -4  -2    1.84    0.16
  -3  -4  -2    1.71    0.18
  -3  -4  -2    1.53    0.18
   3   4   2    1.92    0.17
   3   4   2    1.65    0.17
   3   4   2    1.68    0.18
   3   4   2    1.76    0.15
  -4  -4  -2    4.74    0.47
  -4  -4  -2    4.88    0.44
  -4  -4  -2    4.38    0.42
  -4  -4  -2    4.60    0.40
   4   4   2    5.03    0.40
   4   4   2    4.50    0.41
   4   4   2    4.76    0.42
   4   4   2    4.72    0.44
  -5  -4  -2   22.40    1.96
  -5  -4  -2   24.46    2.30
   5   4   2   25.38    1.98
   5   4   2   23.89    2.07
  -6  -4  -2    2.17    0.22
  -6  -4  -2    1.65    0.24
  -6  -4  -2    1.58    0.22
  -6  -4  -2    1.73    0.20
   6   4   2    1.83    0.19
   6   4   2    1.44    0.22
   6   4   2    2.03    0.20
   6   4   2    1.72    0.19
   6   4   2    1.74    0.21
  -7  -4  -2    3.42    0.41
  -7  -4  -2    4.45    0.40
  -7  -4  -2    3.96    0.39
   7   4   2    4.17    0.38
   7   4   2    3.68    0.39
   7   4   2    4.20    0.43
  -8  -4  -2    2.78    0.34
  -8  -4  -2    2.95    0.32
   8   4   2    3.34    0.32
   8   4   2    2.66    0.30
  -9  -4  -2    0.49    0.12
  -9  -4  -2    0.22    0.18
   9   4   2    0.41    0.17
   9   4   2    0.35    0.11
   9   4   2    0.23    0.13
 -10  -4  -2    2.02    0.25
 -10  -4  -2    1.72    0.25
  10   4   2    1.47    0.25
  10   4   2    1.60    0.23
  10   4   2    1.16    0.20
 -11  -4  -2    0.04    0.20
 -11  -4  -2    0.08    0.12
  11   4   2    0.66    0.21
  11   4   2   -0.01    0.13
  11   4   2    0.28    0.17
 -12  -4  -2    0.69    0.14
  12   4   2    0.36    0.15
  12   4   2    0.56    0.20
 -13  -4  -2   -0.10    0.12
  13   4   2    0.01    0.20
  13   4   2    0.27    0.18
  14  -5  -2   -0.19    0.16
  14  -5  -2    0.49    0.27
 -14   5   2    0.13    0.14
 -14   5   2    0.15    0.14
  13  -5  -2    0.75    0.18
  13  -5  -2    0.99    0.17
 -13   5   2    1.41    0.18
 -13   5   2    1.05    0.16
  12  -5  -2    0.10    0.11
  12  -5  -2    0.03    0.13
 -12   5   2   -0.21    0.10
  11  -5  -2    0.71    0.15
  11  -5  -2    0.92    0.14
  11  -5  -2    1.03    0.20
 -11   5   2    0.60    0.13
 -11   5   2    0.61    0.15
  10  -5  -2   -0.20    0.12
  10  -5  -2    0.23    0.13
  10  -5  -2    0.03    0.10
  10  -5  -2    0.05    0.14
 -10   5   2   -0.03    0.11
 -10   5   2    0.15    0.09
   9  -5  -2    1.70    0.24
   9  -5  -2    2.19    0.27
   9  -5  -2    1.90    0.23
  -9   5   2    2.26    0.22
   8  -5  -2    0.93    0.14
   8  -5  -2    0.69    0.13
   8  -5  -2    0.83    0.14
   8  -5  -2    0.68    0.13
   8  -5  -2    0.58    0.11
  -8   5   2    0.60    0.12
  -8   5   2    0.53    0.10
  -8   5   2    0.57    0.11
   7  -5  -2    0.25    0.08
   7  -5  -2    0.06    0.06
   7  -5  -2    0.18    0.08
   7  -5  -2    0.15    0.08
   7  -5  -2    0.18    0.09
  -7   5   2    0.05    0.05
  -7   5   2    0.21    0.08
  -7   5   2    0.21    0.06
   6  -5  -2    5.37    0.56
   6  -5  -2    5.40    0.53
  -6   5   2    5.93    0.52
  -6   5   2    5.67    0.50
  -6   5   2    5.96    0.49
  -6   5   2    5.49    0.47
   5  -5  -2    0.79    0.11
   5  -5  -2    0.65    0.10
   5  -5  -2    0.76    0.11
   5  -5  -2    0.66    0.07
   5  -5  -2    0.53    0.12
   5  -5  -2    0.72    0.11
  -5   5   2    0.68    0.11
  -5   5   2    0.49    0.09
  -5   5   2    0.75    0.09
  -5   5   2    0.72    0.08
   3  -5  -2   -0.06    0.05
   3  -5  -2    0.04    0.07
   3  -5  -2    0.05    0.05
   3  -5  -2    0.03    0.08
   3  -5  -2   -0.03    0.09
  -3   5   2    0.01    0.02
  -3   5   2    0.06    0.02
   2  -5  -2    1.89    0.21
   2  -5  -2    2.15    0.21
   2  -5  -2    1.69    0.21
   2  -5  -2    1.89    0.19
   2  -5  -2    1.92    0.22
  -2   5   2    1.92    0.16
  -2   5   2    1.99    0.16
   1  -5  -2    3.72    0.39
   1  -5  -2    3.98    0.37
   1  -5  -2    3.44    0.39
   1  -5  -2    3.81    0.34
   1  -5  -2    3.64    0.39
  -1   5   2    3.89    0.31
   0  -5  -2    9.61    1.01
   0  -5  -2   10.09    1.01
   0  -5  -2   10.85    1.00
   0   5   2   10.43    0.84
   0   5   2   10.32    0.84
   0   5   2   10.90    1.00
   1   5   2    9.22    0.76
   1   5   2    9.12    0.90
   1   5   2    9.64    0.76
  -2  -5  -2    0.10    0.07
  -2  -5  -2    0.13    0.03
  -2  -5  -2    0.05    0.05
  -2  -5  -2    0.11    0.09
   2   5   2    0.11    0.04
   2   5   2    0.14    0.08
   2   5   2    0.06    0.03
   2   5   2    0.17    0.08
  -3  -5  -2    1.79    0.18
  -3  -5  -2    1.48    0.16
  -3  -5  -2    1.76    0.20
   3   5   2    1.56    0.17
   3   5   2    1.72    0.15
   3   5   2    1.33    0.19
   3   5   2    2.04    0.17
   3   5   2    1.42    0.22
  -4  -5  -2    0.12    0.08
  -4  -5  -2    0.04    0.08
  -4  -5  -2    0.03    0.05
   4   5   2    0.00    0.07
   4   5   2    0.08    0.05
   4   5   2   -0.04    0.04
   4   5   2   -0.01    0.09
  -5  -5  -2   13.72    1.27
  -5  -5  -2   13.66    1.12
   5   5   2   12.94    1.14
   5   5   2   12.16    1.08
  -6  -5  -2    6.11    0.62
   6   5   2    6.37    0.55
   6   5   2    5.73    0.53
   6   5   2    5.35    0.51
  -7  -5  -2    0.48    0.11
  -7  -5  -2    0.41    0.14
   7   5   2    0.72    0.16
   7   5   2    0.55    0.11
   7   5   2    0.58    0.16
   7   5   2    0.69    0.12
  -8  -5  -2    0.23    0.10
  -8  -5  -2    0.37    0.14
   8   5   2    0.18    0.09
   8   5   2    0.10    0.10
   8   5   2   -0.17    0.18
  -9  -5  -2    1.99    0.23
   9   5   2    1.52    0.22
   9   5   2    1.44    0.22
 -10  -5  -2    0.74    0.20
 -10  -5  -2    0.69    0.15
  10   5   2    0.78    0.16
  10   5   2    0.45    0.21
  10   5   2    0.74    0.16
 -11  -5  -2    0.23    0.12
 -11  -5  -2    0.83    0.22
  11   5   2    0.06    0.19
  11   5   2    0.31    0.20
 -12  -5  -2    1.84    0.23
  12   5   2    1.36    0.28
  12   5   2    1.46    0.21
  14  -6  -2   -0.22    0.16
 -14   6   2   -0.11    0.13
 -14   6   2    0.00    0.14
  13  -6  -2    0.29    0.24
  13  -6  -2   -0.06    0.13
 -13   6   2    0.28    0.14
  12  -6  -2    0.19    0.13
  12  -6  -2   -0.01    0.18
  12  -6  -2   -0.04    0.12
  12  -6  -2    0.32    0.24
 -12   6   2   -0.26    0.09
  11  -6  -2    0.07    0.15
  11  -6  -2   -0.16    0.12
  11  -6  -2    0.03    0.11
  11  -6  -2    0.19    0.16
 -11   6   2    0.06    0.10
 -11   6   2    0.07    0.12
   9  -6  -2   32.99    3.11
  -9   6   2   31.83    2.86
   8  -6  -2    0.79    0.14
   8  -6  -2    0.94    0.15
   8  -6  -2    0.44    0.11
   8  -6  -2    0.55    0.11
   8  -6  -2    0.81    0.14
  -8   6   2    0.65    0.13
  -8   6   2    0.71    0.11
  -8   6   2    0.87    0.12
   7  -6  -2    1.50    0.20
   7  -6  -2    1.42    0.20
   7  -6  -2    1.58    0.18
   7  -6  -2    1.72    0.21
  -7   6   2    1.46    0.16
  -7   6   2    1.50    0.17
   6  -6  -2    0.22    0.08
   6  -6  -2   -0.02    0.08
   6  -6  -2    0.33    0.08
   6  -6  -2    0.14    0.08
   6  -6  -2    0.18    0.07
  -6   6   2    0.13    0.05
  -6   6   2    0.17    0.10
   5  -6  -2    0.15    0.06
   5  -6  -2    0.24    0.10
   5  -6  -2    0.27    0.10
   5  -6  -2    0.21    0.08
   5  -6  -2    0.14    0.08
   5  -6  -2    0.13    0.06
   5  -6  -2    0.16    0.06
   5  -6  -2    0.11    0.05
  -5   6   2    0.15    0.08
  -5   6   2    0.17    0.10
  -5   6   2    0.10    0.03
   4  -6  -2   21.38    1.94
   4  -6  -2   19.90    1.90
   4  -6  -2   20.64    1.97
  -4   6   2   20.63    1.68
   3  -6  -2    0.13    0.07
   3  -6  -2    0.03    0.10
   3  -6  -2    0.22    0.08
   3  -6  -2    0.00    0.09
   3  -6  -2   -0.05    0.07
   3  -6  -2    0.07    0.05
   3  -6  -2    0.06    0.05
   3  -6  -2    0.07    0.10
  -3   6   2    0.08    0.02
  -3   6   2    0.07    0.02
   2  -6  -2    2.41    0.26
   2  -6  -2    2.81    0.25
   2  -6  -2    2.62    0.29
  -2   6   2    2.57    0.22
  -2   6   2    2.78    0.22
   1  -6  -2    1.24    0.18
   1  -6  -2    1.21    0.18
   1  -6  -2    1.12    0.17
   1  -6  -2    1.28    0.14
   1  -6  -2    1.37    0.16
   1  -6  -2    1.30    0.17
   1  -6  -2    1.37    0.18
  -1   6   2    1.39    0.11
  -1   6   2    1.37    0.11
   0  -6  -2    0.10    0.09
   0  -6  -2    0.08    0.07
   0  -6  -2    0.08    0.09
   0  -6  -2    0.03    0.09
   0  -6  -2    0.09    0.05
   0  -6  -2    0.06    0.07
   0   6   2    0.06    0.02
   0   6   2    0.09    0.02
  -1  -6  -2    2.97    0.33
   1   6   2    3.50    0.28
  -2  -6  -2   14.60    1.27
  -2  -6  -2   15.53    1.38
  -2  -6  -2   15.05    1.34
   2   6   2   14.51    1.22
   2   6   2   15.12    1.33
  -3  -6  -2    9.98    0.90
  -3  -6  -2    8.87    0.89
  -3  -6  -2    9.17    0.78
   3   6   2    8.87    0.76
   3   6   2    8.78    0.82
   3   6   2    9.00    0.80
  -4  -6  -2   15.85    1.34
  -4  -6  -2   16.98    1.52
   4   6   2   15.27    1.29
   4   6   2   15.07    1.40
   4   6   2   15.73    1.37
  -5  -6  -2    0.07    0.09
  -5  -6  -2    0.01    0.07
  -5  -6  -2    0.04    0.08
   5   6   2    0.04    0.06
   5   6   2    0.12    0.09
   5   6   2    0.02    0.07
  -6  -6  -2    0.23    0.15
  -6  -6  -2    0.08    0.10
  -6  -6  -2    0.13    0.08
  -6  -6  -2   -0.02    0.10
   6   6   2    0.04    0.08
   6   6   2    0.12    0.07
  -7  -6  -2    0.81    0.16
  -7  -6  -2    0.54    0.16
  -7  -6  -2    1.24    0.16
   7   6   2    0.93    0.13
   7   6   2    0.95    0.23
   7   6   2    0.92    0.15
  -8  -6  -2    0.44    0.11
  -8  -6  -2    0.37    0.14
  -8  -6  -2    0.49    0.18
   8   6   2    0.23    0.22
   8   6   2    0.12    0.12
   8   6   2    0.26    0.10
  -9  -6  -2    0.06    0.16
  -9  -6  -2   -0.04    0.10
   9   6   2    0.02    0.12
   9   6   2   -0.16    0.10
   9   6   2   -0.13    0.22
 -10  -6  -2    1.72    0.21
 -10  -6  -2    1.37    0.24
  10   6   2    1.25    0.20
  10   6   2    1.59    0.29
  10   6   2    1.19    0.19
 -11  -6  -2   -0.06    0.23
 -11  -6  -2    0.19    0.11
  11   6   2   -0.08    0.12
  11   6   2    0.04    0.19
 -12  -6  -2    0.28    0.12
  12   6   2    0.16    0.14
  13  -7  -2    0.03    0.14
  12  -7  -2    0.26    0.21
  12  -7  -2    0.28    0.22
 -12   7   2   -0.02    0.10
  11  -7  -2    4.07    0.44
  11  -7  -2    3.70    0.48
  11  -7  -2    3.17    0.42
 -11   7   2    3.93    0.40
 -11   7   2    3.89    0.37
  10  -7  -2    0.06    0.14
  10  -7  -2    0.12    0.17
  10  -7  -2    0.23    0.11
  10  -7  -2    0.28    0.14
  10  -7  -2    0.21    0.12
 -10   7   2    0.21    0.09
 -10   7   2    0.12    0.13
   9  -7  -2    0.02    0.09
   9  -7  -2    0.21    0.10
   9  -7  -2   -0.02    0.11
   9  -7  -2   -0.12    0.09
   9  -7  -2    0.05    0.15
   9  -7  -2    0.11    0.22
  -9   7   2    0.18    0.12
  -9   7   2    0.03    0.08
   8  -7  -2    0.26    0.08
   8  -7  -2    0.35    0.15
   8  -7  -2    0.30    0.13
   8  -7  -2    0.35    0.12
   8  -7  -2    0.22    0.09
   8  -7  -2    0.12    0.12
   8  -7  -2    0.21    0.09
  -8   7   2    0.38    0.12
  -8   7   2    0.23    0.08
   7  -7  -2    2.43    0.27
   7  -7  -2    1.82    0.24
   7  -7  -2    1.83    0.21
   7  -7  -2    1.44    0.23
   7  -7  -2    2.27    0.24
   7  -7  -2    1.89    0.23
  -7   7   2    2.21    0.24
  -7   7   2    1.92    0.21
  -7   7   2    1.70    0.20
   6  -7  -2   11.19    0.99
   6  -7  -2    9.61    0.99
   5  -7  -2    0.38    0.11
   5  -7  -2    0.49    0.10
   5  -7  -2    0.45    0.10
   5  -7  -2    0.40    0.10
  -5   7   2    0.50    0.08
  -5   7   2    0.51    0.11
  -5   7   2    0.60    0.13
   4  -7  -2    0.80    0.12
   4  -7  -2    1.01    0.16
   4  -7  -2    0.84    0.13
   4  -7  -2    0.50    0.13
   4  -7  -2    0.61    0.11
   4  -7  -2    0.62    0.10
   4  -7  -2    0.84    0.14
   4  -7  -2    0.77    0.11
   4  -7  -2    0.76    0.11
  -4   7   2    0.78    0.09
  -4   7   2    0.77    0.08
   3  -7  -2   11.87    1.11
   3  -7  -2   10.57    1.05
  -3   7   2   11.19    0.93
  -3   7   2   11.81    0.93
   2  -7  -2   26.47    2.51
   2  -7  -2   26.59    2.50
   2  -7  -2   25.17    2.43
  -2   7   2   25.81    2.11
  -2   7   2   26.23    2.11
   1  -7  -2    2.44    0.24
   1  -7  -2    1.81    0.25
   1  -7  -2    2.26    0.22
   1  -7  -2    2.06    0.25
   1  -7  -2    2.38    0.23
  -1   7   2    2.20    0.18
  -1   7   2    2.13    0.18
   0  -7  -2    1.34    0.16
   0  -7  -2    1.25    0.14
   0  -7  -2    0.84    0.15
   0  -7  -2    1.30    0.15
   0  -7  -2    1.26    0.15
   0   7   2    1.04    0.10
   0   7   2    1.07    0.10
  -1  -7  -2    3.04    0.27
  -1  -7  -2    2.84    0.31
  -1  -7  -2    2.70    0.32
  -1  -7  -2    2.37    0.29
   1   7   2    2.95    0.24
   1   7   2    2.66    0.30
   1   7   2    2.79    0.24
  -2  -7  -2    1.49    0.17
  -2  -7  -2    1.35    0.21
  -2  -7  -2    1.61    0.20
  -2  -7  -2    1.54    0.20
  -2  -7  -2    1.64    0.17
   2   7   2    1.58    0.19
   2   7   2    1.38    0.16
   2   7   2    1.34    0.18
   2   7   2    1.52    0.14
  -3  -7  -2    1.40    0.21
  -3  -7  -2    1.69    0.19
  -3  -7  -2    1.58    0.20
  -3  -7  -2    1.45    0.19
   3   7   2    1.75    0.16
   3   7   2    1.71    0.20
  -4  -7  -2   20.30    1.95
  -4  -7  -2   21.07    1.71
   4   7   2   21.27    1.79
   4   7   2   19.80    1.66
   4   7   2   18.96    1.75
  -5  -7  -2    0.26    0.11
  -5  -7  -2    0.15    0.08
  -5  -7  -2    0.23    0.09
   5   7   2    0.21    0.10
   5   7   2    0.20    0.08
   5   7   2    0.18    0.08
  -6  -7  -2    4.27    0.39
  -6  -7  -2    4.19    0.41
   6   7   2    3.81    0.41
   6   7   2    4.18    0.39
  -7  -7  -2    0.00    0.11
  -7  -7  -2   -0.19    0.08
  -7  -7  -2    0.05    0.12
   7   7   2   -0.06    0.11
   7   7   2   -0.02    0.09
  -8  -7  -2    0.56    0.12
  -8  -7  -2    0.45    0.16
   8   7   2    0.62    0.14
   8   7   2    0.52    0.12
  -9  -7  -2    0.34    0.16
  -9  -7  -2    0.10    0.11
   9   7   2    0.07    0.10
   9   7   2   -0.10    0.12
 -10  -7  -2    0.50    0.21
 -10  -7  -2    1.00    0.16
  10   7   2    0.74    0.16
  10   7   2    0.85    0.17
 -11  -7  -2    0.42    0.12
 -11  -7  -2    0.17    0.26
  11   7   2    0.55    0.20
 -12  -7  -2    1.28    0.18
  12   7   2    0.85    0.18
  13  -8  -2    0.09    0.12
 -13   8   2    0.14    0.16
  12  -8  -2    0.68    0.20
  12  -8  -2    0.45    0.14
 -12   8   2    0.22    0.11
  11  -8  -2    0.11    0.15
  11  -8  -2   -0.07    0.11
  11  -8  -2   -0.21    0.16
  11  -8  -2    0.05    0.23
 -11   8   2    0.07    0.14
 -11   8   2    0.15    0.10
  10  -8  -2    0.30    0.15
  10  -8  -2    0.31    0.21
  10  -8  -2    0.14    0.14
  10  -8  -2    0.43    0.14
 -10   8   2    0.29    0.09
 -10   8   2    0.34    0.14
   9  -8  -2    0.20    0.17
  -9   8   2    0.35    0.14
   8  -8  -2    4.47    0.48
   8  -8  -2    4.25    0.48
   8  -8  -2    4.64    0.48
   8  -8  -2    5.15    0.53
  -8   8   2    4.86    0.43
   7  -8  -2    0.65    0.14
   7  -8  -2    0.83    0.17
   7  -8  -2    0.74    0.13
   7  -8  -2    0.72    0.14
   7  -8  -2    0.53    0.12
   7  -8  -2    0.89    0.14
  -7   8   2    0.82    0.12
  -7   8   2    0.90    0.15
   6  -8  -2    0.36    0.09
   6  -8  -2    0.26    0.11
   6  -8  -2    0.27    0.13
   6  -8  -2    0.27    0.10
   6  -8  -2    0.46    0.11
   6  -8  -2    0.00    0.12
   6  -8  -2    0.01    0.10
  -6   8   2   -0.04    0.13
  -6   8   2    0.21    0.07
  -6   8   2    0.29    0.09
   5  -8  -2    0.04    0.11
   5  -8  -2    0.03    0.06
   5  -8  -2    0.17    0.12
   5  -8  -2   -0.02    0.09
   5  -8  -2    0.11    0.09
   5  -8  -2    0.06    0.09
   5  -8  -2    0.10    0.06
  -5   8   2    0.03    0.04
  -5   8   2    0.08    0.10
   4  -8  -2   -0.08    0.09
   4  -8  -2    0.05    0.06
   4  -8  -2    0.12    0.10
   4  -8  -2    0.00    0.11
   4  -8  -2    0.03    0.08
   4  -8  -2    0.21    0.09
  -4   8   2    0.01    0.03
  -4   8   2    0.04    0.04
   3  -8  -2    1.94    0.28
   3  -8  -2    2.30    0.25
   3  -8  -2    1.80    0.22
   3  -8  -2    1.90    0.26
   3  -8  -2    2.20    0.24
  -3   8   2    2.25    0.18
  -3   8   2    2.12    0.18
   2  -8  -2    2.74    0.33
   2  -8  -2    3.24    0.33
   2  -8  -2    2.77    0.32
   2  -8  -2    3.11    0.31
   2  -8  -2    2.66    0.30
   2  -8  -2    2.96    0.31
   2  -8  -2    2.99    0.28
   1  -8  -2    2.47    0.26
   1  -8  -2    1.95    0.23
   1  -8  -2    1.74    0.22
   1  -8  -2    2.20    0.23
   1  -8  -2    2.13    0.20
   1  -8  -2    1.57    0.23
  -1   8   2    1.94    0.16
   0  -8  -2    0.88    0.15
   0  -8  -2    0.68    0.11
   0  -8  -2    0.68    0.13
   0  -8  -2    0.47    0.14
   0  -8  -2    0.92    0.14
   0   8   2    0.64    0.07
   0   8   2    0.86    0.08
  -1  -8  -2    1.39    0.21
  -1  -8  -2    2.04    0.21
  -1  -8  -2    1.90    0.20
  -1  -8  -2    1.56    0.18
   1   8   2    1.64    0.16
  -2  -8  -2    5.00    0.49
  -2  -8  -2    4.84    0.48
  -2  -8  -2    4.74    0.47
  -2  -8  -2    4.60    0.48
   2   8   2    4.40    0.39
   2   8   2    4.49    0.42
   2   8   2    4.76    0.45
  -3  -8  -2    2.43    0.29
  -3  -8  -2    2.99    0.26
  -3  -8  -2    2.78    0.28
  -3  -8  -2    2.29    0.25
   3   8   2    2.42    0.28
   3   8   2    2.61    0.25
  -4  -8  -2    0.79    0.13
  -4  -8  -2    0.91    0.16
  -4  -8  -2    0.97    0.14
   4   8   2    1.29    0.15
   4   8   2    0.88    0.12
   4   8   2    1.01    0.14
  -6  -8  -2    1.01    0.16
  -6  -8  -2    0.94    0.18
  -6  -8  -2    0.98    0.14
   6   8   2    0.91    0.13
   6   8   2    0.90    0.15
  -7  -8  -2    0.03    0.09
  -7  -8  -2    0.09    0.14
   7   8   2    0.01    0.11
  -8  -8  -2    0.36    0.12
  -8  -8  -2    0.45    0.17
  -8  -8  -2    0.11    0.17
   8   8   2    0.35    0.13
   8   8   2    0.35    0.11
  -9  -8  -2    0.53    0.12
  -9  -8  -2    0.36    0.17
   9   8   2    0.37    0.15
   9   8   2    0.27    0.12
 -10  -8  -2    0.03    0.11
 -10  -8  -2    0.25    0.21
  10   8   2    0.03    0.12
  10   8   2    0.21    0.13
 -11  -8  -2    0.43    0.14
  11   8   2    0.37    0.23
  11   8   2    0.34    0.14
  13  -9  -2    0.14    0.14
 -13   9   2    0.24    0.19
  12  -9  -2   -0.28    0.12
 -12   9   2    0.11    0.10
  11  -9  -2    0.93    0.18
  11  -9  -2    0.35    0.14
  11  -9  -2    0.49    0.17
 -11   9   2    0.72    0.12
 -11   9   2    0.43    0.16
  10  -9  -2   -0.01    0.12
  10  -9  -2   -0.11    0.13
  10  -9  -2    0.04    0.14
 -10   9   2   -0.16    0.14
 -10   9   2    0.13    0.10
   9  -9  -2    0.00    0.21
   9  -9  -2    0.29    0.14
   9  -9  -2    0.44    0.13
   9  -9  -2    0.35    0.16
  -9   9   2    0.41    0.10
  -9   9   2    0.47    0.15
   8  -9  -2    4.03    0.46
   8  -9  -2    3.84    0.39
   8  -9  -2    3.51    0.39
   8  -9  -2    3.62    0.39
  -8   9   2    3.19    0.34
  -8   9   2    3.31    0.39
   7  -9  -2    0.12    0.11
   7  -9  -2   -0.01    0.17
   7  -9  -2    0.25    0.09
   7  -9  -2    0.34    0.11
   7  -9  -2    0.16    0.12
  -7   9   2   -0.01    0.09
   6  -9  -2    2.21    0.26
   6  -9  -2    2.41    0.26
   6  -9  -2    1.97    0.28
   6  -9  -2    2.10    0.25
   6  -9  -2    2.04    0.26
  -6   9   2    1.97    0.23
  -6   9   2    1.78    0.22
   5  -9  -2    0.89    0.14
   5  -9  -2    0.38    0.11
   5  -9  -2    0.47    0.13
   5  -9  -2    0.48    0.17
   5  -9  -2    0.66    0.14
   5  -9  -2    0.62    0.11
  -5   9   2    0.59    0.08
   4  -9  -2    1.65    0.22
   4  -9  -2    1.58    0.21
   4  -9  -2    1.94    0.23
   4  -9  -2    1.59    0.23
   4  -9  -2    1.90    0.21
  -4   9   2    1.60    0.14
   3  -9  -2    0.89    0.17
   3  -9  -2    1.12    0.15
   3  -9  -2    0.64    0.13
   3  -9  -2    0.77    0.15
   3  -9  -2    1.21    0.15
   3  -9  -2    0.85    0.14
   3  -9  -2    0.75    0.14
   2  -9  -2    1.44    0.18
   2  -9  -2    1.27    0.21
   2  -9  -2    1.40    0.22
   2  -9  -2    1.64    0.20
   2  -9  -2    1.76    0.21
   2  -9  -2    1.50    0.18
   1  -9  -2    0.03    0.11
   1  -9  -2    0.09    0.06
   1  -9  -2    0.31    0.10
   1  -9  -2    0.07    0.10
   1  -9  -2    0.08    0.10
   1  -9  -2    0.07    0.10
   1  -9  -2    0.17    0.09
   0  -9  -2   -0.02    0.09
   0  -9  -2    0.10    0.07
   0  -9  -2    0.07    0.13
   0  -9  -2    0.11    0.09
   0  -9  -2    0.08    0.12
   0  -9  -2    0.01    0.05
   0  -9  -2   -0.04    0.09
   0   9   2    0.03    0.03
   0   9   2    0.02    0.04
  -1  -9  -2    0.06    0.07
  -1  -9  -2    0.05    0.07
  -1  -9  -2    0.02    0.09
  -1  -9  -2    0.03    0.09
  -1  -9  -2    0.01    0.12
  -1  -9  -2    0.09    0.09
   1   9   2    0.11    0.07
   1   9   2    0.08    0.05
  -2  -9  -2    4.83    0.49
  -2  -9  -2    4.48    0.43
  -2  -9  -2    4.83    0.47
  -2  -9  -2    5.00    0.49
  -2  -9  -2    4.52    0.51
   2   9   2    4.65    0.46
   2   9   2    4.58    0.44
   2   9   2    4.87    0.41
  -3  -9  -2    4.69    0.41
  -3  -9  -2    4.50    0.46
  -3  -9  -2    4.36    0.46
  -3  -9  -2    4.32    0.45
   3   9   2    4.26    0.39
   3   9   2    4.55    0.41
  -4  -9  -2   -0.07    0.08
  -4  -9  -2   -0.07    0.09
  -4  -9  -2    0.03    0.08
  -4  -9  -2    0.09    0.11
   4   9   2   -0.06    0.08
   4   9   2   -0.06    0.10
  -7  -9  -2   -0.06    0.13
  -7  -9  -2    0.15    0.10
  -7  -9  -2    0.30    0.15
   7   9   2    0.24    0.13
   7   9   2    0.06    0.10
  -8  -9  -2    0.29    0.11
  -8  -9  -2    0.33    0.16
  -8  -9  -2    0.11    0.19
   8   9   2    0.11    0.14
   8   9   2    0.38    0.11
  -9  -9  -2    0.11    0.12
  -9  -9  -2    0.01    0.18
   9   9   2   -0.07    0.12
   9   9   2   -0.02    0.11
 -10  -9  -2   -0.04    0.22
 -10  -9  -2    0.03    0.15
 -10  -9  -2    0.39    0.14
  10   9   2    0.21    0.13
 -11  -9  -2   -0.14    0.17
  11   9   2    0.21    0.13
  12 -10  -2    0.11    0.13
  12 -10  -2    0.46    0.19
 -12  10   2   -0.01    0.11
 -12  10   2    0.07    0.22
  11 -10  -2    0.00    0.16
  11 -10  -2   -0.02    0.15
  11 -10  -2   -0.21    0.12
 -11  10   2    0.06    0.10
  10 -10  -2    0.57    0.15
  10 -10  -2    0.72    0.16
  10 -10  -2    0.69    0.16
 -10  10   2    0.47    0.12
 -10  10   2    0.81    0.19
   9 -10  -2    0.10    0.12
   9 -10  -2    0.11    0.13
   9 -10  -2    0.30    0.13
  -9  10   2    0.12    0.17
  -9  10   2    0.18    0.10
   8 -10  -2   19.83    1.79
   8 -10  -2   19.22    1.80
   8 -10  -2   20.26    1.84
   8 -10  -2   18.25    1.84
   7 -10  -2    6.85    0.64
   7 -10  -2    6.81    0.65
  -7  10   2    5.94    0.59
   6 -10  -2    0.14    0.09
   6 -10  -2    0.13    0.12
   6 -10  -2    0.06    0.11
   6 -10  -2   -0.04    0.13
   6 -10  -2    0.09    0.11
  -6  10   2    0.19    0.10
   5 -10  -2    0.31    0.13
   5 -10  -2    0.49    0.12
   5 -10  -2    0.28    0.11
   5 -10  -2    0.41    0.21
   5 -10  -2    0.22    0.14
   5 -10  -2    0.26    0.12
   4 -10  -2    5.42    0.48
   4 -10  -2    5.11    0.50
   4 -10  -2    4.61    0.52
   4 -10  -2    5.42    0.57
   4 -10  -2    5.10    0.51
   3 -10  -2    0.99    0.15
   3 -10  -2    1.12    0.20
   3 -10  -2    1.20    0.18
   3 -10  -2    1.11    0.18
   3 -10  -2    1.00    0.17
   3 -10  -2    1.49    0.22
   3 -10  -2    0.89    0.16
   2 -10  -2    2.50    0.31
   2 -10  -2    2.72    0.37
   2 -10  -2    2.30    0.31
   2 -10  -2    2.55    0.26
   2 -10  -2    2.73    0.30
   2 -10  -2    2.49    0.27
   2 -10  -2    2.73    0.29
   2 -10  -2    2.87    0.31
   1 -10  -2    0.33    0.10
   1 -10  -2    0.44    0.15
   1 -10  -2    0.43    0.10
   1 -10  -2    0.40    0.13
   1 -10  -2    0.40    0.10
   1 -10  -2    0.51    0.16
   1 -10  -2    0.43    0.10
   1 -10  -2    0.30    0.12
   0 -10  -2    4.21    0.46
   0 -10  -2    4.40    0.41
   0 -10  -2    3.98    0.47
   0 -10  -2    4.69    0.45
   0 -10  -2    4.41    0.47
   0  10   2    4.60    0.37
  -1 -10  -2    0.12    0.08
  -1 -10  -2   -0.09    0.15
  -1 -10  -2   -0.09    0.11
  -1 -10  -2    0.14    0.10
  -1 -10  -2    0.13    0.08
  -1 -10  -2    0.03    0.11
   1  10   2    0.10    0.10
  -2 -10  -2    0.22    0.11
  -2 -10  -2    0.25    0.13
  -2 -10  -2    0.38    0.10
  -2 -10  -2    0.30    0.10
  -2 -10  -2    0.15    0.13
   2  10   2    0.60    0.15
   2  10   2    0.13    0.09
   2  10   2    0.40    0.10
  -3 -10  -2    0.49    0.12
  -3 -10  -2    0.35    0.10
  -3 -10  -2    0.48    0.16
  -3 -10  -2    0.67    0.14
   3  10   2    0.83    0.16
   3  10   2    0.58    0.11
  -5 -10  -2    0.34    0.14
  -5 -10  -2    0.42    0.13
  -5 -10  -2    0.50    0.13
   5  10   2    0.24    0.10
   5  10   2    0.51    0.15
  -6 -10  -2    2.67    0.31
  -6 -10  -2    2.45    0.32
  -6 -10  -2    2.48    0.29
   6  10   2    2.17    0.31
   6  10   2    2.77    0.28
  -7 -10  -2    0.20    0.14
  -7 -10  -2   -0.13    0.13
  -7 -10  -2    0.27    0.16
  -7 -10  -2    0.11    0.13
   7  10   2    0.12    0.10
   7  10   2    0.03    0.13
  -8 -10  -2    0.16    0.19
  -8 -10  -2    0.40    0.17
  -8 -10  -2    0.17    0.14
   8  10   2    0.34    0.11
   8  10   2    0.23    0.14
  -9 -10  -2    0.04    0.14
  -9 -10  -2    0.02    0.19
   9  10   2    0.28    0.12
   9  10   2    0.17    0.13
 -10 -10  -2    0.02    0.17
 -10 -10  -2   -0.37    0.27
  10  10   2    0.26    0.16
  10  10   2    0.10    0.14
  12 -11  -2    0.11    0.14
  12 -11  -2    0.28    0.21
  11 -11  -2   -0.02    0.13
  11 -11  -2   -0.01    0.16
  11 -11  -2    0.15    0.16
 -11  11   2    0.24    0.11
  10 -11  -2    0.08    0.13
  10 -11  -2    0.07    0.15
  10 -11  -2    0.14    0.14
 -10  11   2    0.01    0.10
   9 -11  -2    0.14    0.12
   9 -11  -2   -0.14    0.12
   9 -11  -2   -0.17    0.11
  -9  11   2   -0.07    0.11
   8 -11  -2    2.20    0.33
   8 -11  -2    2.93    0.33
   8 -11  -2    2.78    0.34
  -8  11   2    2.68    0.28
   7 -11  -2    1.14    0.18
   7 -11  -2    1.14    0.18
   7 -11  -2    0.61    0.17
   7 -11  -2    0.87    0.18
  -7  11   2    0.79    0.15
   6 -11  -2   -0.16    0.12
   6 -11  -2    0.10    0.12
   6 -11  -2    0.05    0.13
   6 -11  -2   -0.03    0.12
   6 -11  -2   -0.05    0.14
  -6  11   2   -0.06    0.11
   5 -11  -2    0.06    0.13
   5 -11  -2    0.28    0.12
   5 -11  -2    0.09    0.12
   5 -11  -2    0.06    0.11
   5 -11  -2    0.48    0.15
   4 -11  -2    2.53    0.28
   4 -11  -2    2.63    0.30
   4 -11  -2    2.14    0.27
   4 -11  -2    1.73    0.29
   4 -11  -2    2.16    0.28
   4 -11  -2    2.45    0.29
   3 -11  -2    1.17    0.20
   3 -11  -2    1.60    0.24
   3 -11  -2    1.71    0.21
   3 -11  -2    1.84    0.21
   3 -11  -2    1.87    0.21
   3 -11  -2    1.06    0.23
   3 -11  -2    1.42    0.21
   2 -11  -2    0.00    0.12
   2 -11  -2   -0.02    0.11
   2 -11  -2   -0.07    0.11
   2 -11  -2    0.19    0.16
   2 -11  -2   -0.04    0.08
   2 -11  -2   -0.06    0.15
   2 -11  -2   -0.03    0.10
   1 -11  -2    0.55    0.14
   1 -11  -2    0.57    0.12
   1 -11  -2    0.63    0.14
   1 -11  -2    0.50    0.15
   1 -11  -2    0.72    0.22
   1 -11  -2    0.55    0.16
   0 -11  -2    5.79    0.61
   0 -11  -2    6.45    0.53
   0 -11  -2    5.68    0.64
   0 -11  -2    5.62    0.61
   0 -11  -2    5.51    0.57
   0 -11  -2    5.89    0.59
  -1 -11  -2    0.13    0.12
  -1 -11  -2    0.35    0.13
  -1 -11  -2    0.27    0.14
  -1 -11  -2    0.20    0.21
  -1 -11  -2    0.28    0.10
  -1 -11  -2    0.22    0.11
   1  11   2    0.16    0.11
   1  11   2    0.26    0.08
  -2 -11  -2    1.94    0.27
  -2 -11  -2    1.81    0.24
  -2 -11  -2    2.36    0.27
  -2 -11  -2    1.83    0.29
   2  11   2    2.01    0.23
  -6 -11  -2    0.03    0.14
  -6 -11  -2   -0.14    0.12
  -6 -11  -2   -0.05    0.13
   6  11   2   -0.05    0.14
   6  11   2   -0.02    0.10
  -7 -11  -2    1.02    0.20
  -7 -11  -2    0.79    0.19
  -7 -11  -2    1.01    0.21
   7  11   2    1.27    0.17
   7  11   2    1.45    0.20
  -8 -11  -2   -0.23    0.14
  -8 -11  -2   -0.14    0.17
   8  11   2    0.02    0.14
   8  11   2    0.02    0.11
  -9 -11  -2    0.03    0.16
  -9 -11  -2   -0.02    0.20
   9  11   2    0.14    0.13
   9  11   2    0.35    0.15
  11 -12  -2    0.31    0.15
  11 -12  -2    0.51    0.17
  11 -12  -2    0.45    0.17
 -11  12   2    0.14    0.11
  10 -12  -2    0.14    0.14
  10 -12  -2   -0.06    0.15
  10 -12  -2    0.28    0.14
 -10  12   2    0.07    0.11
   9 -12  -2   -0.21    0.13
   9 -12  -2    0.05    0.14
   9 -12  -2   -0.04    0.13
  -9  12   2    0.06    0.12
   8 -12  -2    0.45    0.15
   8 -12  -2    0.33    0.15
   8 -12  -2    0.18    0.14
   8 -12  -2    0.44    0.15
  -8  12   2    0.75    0.13
   7 -12  -2    0.10    0.13
   7 -12  -2    0.12    0.14
   7 -12  -2   -0.08    0.12
   7 -12  -2   -0.02    0.12
  -7  12   2   -0.21    0.13
   6 -12  -2    0.50    0.16
   6 -12  -2    0.55    0.16
   6 -12  -2    0.30    0.13
   6 -12  -2    0.23    0.13
   6 -12  -2    0.45    0.14
  -6  12   2    0.20    0.14
   5 -12  -2    0.63    0.16
   5 -12  -2    0.77    0.16
   5 -12  -2    0.65    0.16
   5 -12  -2    0.58    0.18
   4 -12  -2    0.40    0.15
   4 -12  -2    0.64    0.15
   4 -12  -2    0.30    0.18
   4 -12  -2    0.48    0.14
   4 -12  -2    0.43    0.16
   4 -12  -2    0.61    0.15
   3 -12  -2    1.95    0.26
   3 -12  -2    1.97    0.27
   3 -12  -2    2.34    0.24
   3 -12  -2    1.50    0.27
   3 -12  -2    1.59    0.25
   2 -12  -2   -0.04    0.12
   2 -12  -2    0.03    0.09
   2 -12  -2   -0.07    0.14
   2 -12  -2   -0.19    0.21
   2 -12  -2    0.03    0.09
   2 -12  -2   -0.06    0.13
   1 -12  -2   -0.05    0.12
   1 -12  -2   -0.29    0.17
   1 -12  -2   -0.02    0.16
   1 -12  -2    0.16    0.13
   1 -12  -2    0.00    0.09
   1 -12  -2    0.01    0.10
   0 -12  -2    0.57    0.16
   0 -12  -2    0.53    0.15
   0 -12  -2    0.46    0.13
   0 -12  -2    0.52    0.15
  -1 -12  -2    3.48    0.33
  -1 -12  -2    3.17    0.39
  -1 -12  -2    2.84    0.36
  -1 -12  -2    4.01    0.40
   1  12   2    3.76    0.35
  -2 -12  -2   -0.04    0.15
   2  12   2    0.08    0.10
  -5 -12  -2   -0.15    0.12
  -5 -12  -2    0.09    0.14
  -5 -12  -2   -0.07    0.13
   5  12   2    0.14    0.16
   5  12   2    0.18    0.10
  -6 -12  -2    0.18    0.14
  -6 -12  -2    0.09    0.14
  -6 -12  -2    0.04    0.15
   6  12   2    0.05    0.11
   6  12   2    0.19    0.16
  -7 -12  -2    0.80    0.18
  -7 -12  -2    0.33    0.18
   7  12   2    0.80    0.18
   7  12   2    0.73    0.13
  -8 -12  -2    0.42    0.17
  -8 -12  -2    0.16    0.19
   8  12   2    0.31    0.17
  -9 -12  -2    0.22    0.19
   9  12   2    0.29    0.16
   9  12   2    0.01    0.13
  10 -13  -2    0.10    0.15
  10 -13  -2    0.58    0.17
  10 -13  -2    0.25    0.15
 -10  13   2    0.52    0.13
   9 -13  -2    1.38    0.22
   9 -13  -2    1.75    0.25
   9 -13  -2    1.94    0.26
   8 -13  -2    0.13    0.15
   8 -13  -2   -0.16    0.12
   8 -13  -2    0.02    0.14
   8 -13  -2    0.08    0.14
  -8  13   2    0.17    0.13
   7 -13  -2    0.16    0.14
   7 -13  -2    0.33    0.14
   7 -13  -2   -0.16    0.13
   7 -13  -2    0.36    0.17
  -7  13   2    0.07    0.14
   6 -13  -2    0.23    0.13
   6 -13  -2    0.32    0.16
   6 -13  -2    0.04    0.14
   6 -13  -2    0.61    0.17
   6 -13  -2    0.14    0.14
  -6  13   2   -0.08    0.14
   5 -13  -2    1.00    0.20
   5 -13  -2    0.80    0.18
   5 -13  -2    0.84    0.20
   5 -13  -2    1.25    0.22
   5 -13  -2    1.05    0.19
   4 -13  -2    0.04    0.13
   4 -13  -2    0.23    0.14
   4 -13  -2   -0.01    0.15
   4 -13  -2   -0.11    0.13
   4 -13  -2    0.04    0.13
   3 -13  -2    0.75    0.18
   3 -13  -2    1.12    0.20
   3 -13  -2    1.12    0.17
   3 -13  -2    1.15    0.20
   3 -13  -2    1.05    0.18
   2 -13  -2    0.67    0.15
   2 -13  -2    0.75    0.17
   2 -13  -2    0.86    0.17
   2 -13  -2    1.09    0.20
   2 -13  -2    0.95    0.18
  -4 -13  -2    0.17    0.14
  -4 -13  -2    0.10    0.12
  -4 -13  -2    0.22    0.14
   4  13   2    0.07    0.11
  -5 -13  -2    0.10    0.13
  -5 -13  -2    0.26    0.15
  -5 -13  -2    0.18    0.15
   5  13   2    0.25    0.11
   5  13   2    0.48    0.21
  -6 -13  -2    0.06    0.16
  -6 -13  -2    0.12    0.15
  -6 -13  -2    0.05    0.16
   6  13   2    0.19    0.11
  -7 -13  -2    0.70    0.20
  -7 -13  -2    0.80    0.20
  -7 -13  -2    0.55    0.21
   7  13   2    0.86    0.22
  -8 -13  -2    0.28    0.22
  -8 -13  -2   -0.06    0.19
   8  13   2    0.36    0.13
   9 -14  -2   -0.05    0.14
   9 -14  -2    0.15    0.20
   9 -14  -2   -0.21    0.15
  -9  14   2    0.16    0.15
   8 -14  -2    0.18    0.19
   8 -14  -2   -0.09    0.15
   8 -14  -2   -0.03    0.15
   8 -14  -2    0.22    0.14
  -8  14   2    0.12    0.15
   7 -14  -2    0.14    0.14
   7 -14  -2    0.17    0.21
   7 -14  -2    0.32    0.15
   7 -14  -2   -0.07    0.14
   6 -14  -2    1.58    0.24
   6 -14  -2    1.55    0.23
   6 -14  -2    1.71    0.25
   6 -14  -2    1.66    0.29
   5 -14  -2    0.43    0.16
   5 -14  -2    0.79    0.16
   5 -14  -2    0.46    0.18
   5 -14  -2    0.62    0.17
   4 -14  -2    0.48    0.15
   4 -14  -2    0.51    0.16
   4 -14  -2    0.24    0.16
   4 -14  -2    0.41    0.16
   3 -14  -2    1.15    0.19
   3 -14  -2    1.22    0.20
   3 -14  -2    1.04    0.21
   3 -14  -2    1.32    0.20
   2 -14  -2   -0.15    0.13
   2 -14  -2   -0.09    0.13
   2 -14  -2   -0.09    0.14
   2 -14  -2    0.19    0.22
   2 -14  -2   -0.04    0.12
   1 -14  -2   -0.10    0.15
   1 -14  -2    0.19    0.14
   1 -14  -2   -0.04    0.14
   1 -14  -2   -0.12    0.11
   0 -14  -2    0.29    0.12
   0 -14  -2    0.22    0.16
   0 -14  -2    0.41    0.15
   0 -14  -2    0.30    0.15
   0  14   2    0.23    0.16
  -1 -14  -2    0.18    0.13
  -1 -14  -2    0.43    0.16
  -1 -14  -2    0.47    0.20
  -1 -14  -2    0.26    0.16
   1  14   2    0.71    0.15
  -2 -14  -2    0.00    0.14
  -2 -14  -2    0.00    0.13
  -2 -14  -2    0.06    0.12
   2  14   2    0.20    0.13
  -3 -14  -2    0.53    0.17
  -3 -14  -2    0.36    0.13
  -3 -14  -2    0.60    0.17
   3  14   2    0.64    0.14
  -4 -14  -2    0.06    0.12
  -4 -14  -2   -0.06    0.14
  -4 -14  -2    0.55    0.17
   4  14   2    0.23    0.12
  -5 -14  -2    0.11    0.13
  -5 -14  -2    0.14    0.16
  -5 -14  -2    0.08    0.17
   5  14   2    0.14    0.12
  -6 -14  -2    0.11    0.17
  -6 -14  -2    0.11    0.16
  -6 -14  -2    0.07    0.16
   6  14   2    0.23    0.12
  -7 -14  -2    0.02    0.19
  -7 -14  -2    0.07    0.20
   7  14   2   -0.14    0.13
   8 -15  -2    0.50    0.16
   8 -15  -2    0.56    0.17
   7 -15  -2   -0.06    0.15
   6 -15  -2    0.29    0.14
   6 -15  -2   -0.03    0.14
   6 -15  -2    0.06    0.16
   5 -15  -2    1.03    0.21
   5 -15  -2    0.63    0.17
   5 -15  -2    0.71    0.20
   5 -15  -2    0.90    0.18
   4 -15  -2    0.64    0.20
   4 -15  -2    0.88    0.17
   4 -15  -2    0.58    0.17
   3 -15  -2    2.62    0.32
   3 -15  -2    1.73    0.25
   3 -15  -2    2.28    0.31
   3 -15  -2    1.88    0.29
   3 -15  -2    2.40    0.30
   2 -15  -2    0.18    0.14
   2 -15  -2   -0.08    0.14
   2 -15  -2    0.03    0.15
   2 -15  -2    0.24    0.16
   1 -15  -2    0.43    0.18
   1 -15  -2    0.54    0.14
   1 -15  -2    0.52    0.16
   1 -15  -2    0.68    0.17
   0 -15  -2    0.34    0.15
   0 -15  -2    0.22    0.13
   0 -15  -2    0.30    0.16
   0 -15  -2    0.33    0.20
  -1 -15  -2    2.79    0.30
  -1 -15  -2    2.77    0.36
  -1 -15  -2    3.07    0.36
   1  15   2    2.50    0.34
  -2 -15  -2    0.10    0.16
  -2 -15  -2    0.37    0.13
  -2 -15  -2    0.17    0.14
   2  15   2    0.31    0.15
  -3 -15  -2   -0.09    0.13
  -3 -15  -2    0.21    0.15
  -3 -15  -2    0.04    0.16
  -4 -15  -2    0.72    0.16
   4  15   2    0.97    0.16
  -5 -15  -2    0.94    0.22
  -5 -15  -2    1.10    0.21
  -5 -15  -2    1.28    0.19
   5  15   2    1.27    0.18
   7 -16  -2    0.57    0.16
   7 -16  -2   -0.13    0.15
   7 -16  -2    0.30    0.21
   6 -16  -2    0.75    0.21
   6 -16  -2    0.51    0.17
   6 -16  -2    0.70    0.18
   5 -16  -2    0.43    0.17
   5 -16  -2    0.70    0.22
   4 -16  -2    1.02    0.19
   3 -16  -2    0.60    0.18
   3 -16  -2    0.57    0.17
   3 -16  -2    0.57    0.21
   2 -16  -2   -0.27    0.15
   2 -16  -2   -0.15    0.16
   2 -16  -2    0.05    0.19
   1 -16  -2    0.70    0.17
   1 -16  -2    0.58    0.18
   1 -16  -2    0.59    0.15
   0 -16  -2    0.03    0.15
   0 -16  -2    0.12    0.13
   0 -16  -2    0.25    0.16
  -1 -16  -2    0.13    0.12
  -1 -16  -2    0.27    0.17
  -1 -16  -2    0.14    0.16
   1  16   2    0.16    0.21
  -2 -16  -2    0.21    0.14
  -2 -16  -2    0.29    0.17
   2  16   2    0.49    0.19
  -3 -16  -2   -0.13    0.13
  -3 -16  -2    0.06    0.16
  -3 -16  -2   -0.04    0.17
   3  16   2    0.47    0.16
  -4 -16  -2   -0.04    0.15
  -4 -16  -2    0.08    0.19
  -4 -16  -2    0.31    0.17
   4  16   2    0.47    0.16
   5 -17  -2    0.09    0.17
   5 -17  -2   -0.05    0.19
   4 -17  -2    0.04    0.21
   4 -17  -2    0.21    0.16
   3 -17  -2   -0.20    0.22
   3 -17  -2    0.14    0.16
   3 -17  -2    0.09    0.19
   2 -17  -2    0.50    0.17
   2 -17  -2   -0.18    0.27
   2 -17  -2    0.54    0.18
   1 -17  -2    0.23    0.17
   1 -17  -2    0.22    0.17
   0 -17  -2    1.08    0.21
  -1 -17  -2    0.10    0.16
  -1 -17  -2    0.11    0.18
   2  18  -3    0.47    0.13
  -2 -18   3    0.09    0.23
  -2 -18   3    0.37    0.17
  -2 -18   3    0.12    0.16
   1  18  -3    0.63    0.14
  -1 -18   3    0.47    0.16
  -1 -18   3    0.25    0.20
  -1 -18   3    0.61    0.16
   0  18  -3    0.02    0.13
   0 -18   3    0.18    0.15
   0 -18   3    0.31    0.14
   0 -18   3   -0.06    0.16
  -1  18  -3    0.05    0.14
   1 -18   3    0.05    0.13
   1 -18   3   -0.14    0.14
   1 -18   3    0.25    0.15
   2 -18   3    0.49    0.16
   2 -18   3    0.56    0.16
   2 -18   3    0.71    0.17
  -3  18  -3    0.05    0.13
   3 -18   3   -0.02    0.15
   3 -18   3    0.23    0.15
  -4  18  -3    0.55    0.15
   4 -18   3    0.94    0.18
   4 -18   3    1.05    0.17
   5  17  -3    0.22    0.12
  -5 -17   3   -0.10    0.16
   4  17  -3    0.28    0.11
  -4 -17   3    0.09    0.15
  -4 -17   3   -0.07    0.20
   3  17  -3    3.00    0.30
  -3 -17   3    2.40    0.36
  -3 -17   3    2.80    0.41
   2  17  -3    0.31    0.13
  -2 -17   3    0.03    0.15
  -2 -17   3    0.23    0.15
   1  17  -3    0.13    0.12
  -1 -17   3    0.06    0.15
  -1 -17   3    0.43    0.15
  -1 -17   3   -0.05    0.14
   0  17  -3    0.40    0.13
   0 -17   3    0.16    0.15
   0 -17   3    0.08    0.14
   0 -17   3    0.29    0.15
  -1  17  -3    0.13    0.11
   1 -17   3   -0.08    0.13
   1 -17   3   -0.09    0.14
   1 -17   3    0.32    0.15
  -2  17  -3    0.09    0.12
   2 -17   3    0.10    0.14
   2 -17   3    0.23    0.14
   2 -17   3   -0.23    0.14
   3 -17   3    0.69    0.16
   3 -17   3    0.64    0.16
   3 -17   3    0.55    0.16
   3 -17   3    0.12    0.23
  -4  17  -3    0.55    0.13
   4 -17   3    0.59    0.16
   4 -17   3    0.70    0.16
   4 -17   3    0.70    0.20
  -5  17  -3   -0.09    0.11
   5 -17   3    0.15    0.17
  -6  17  -3    0.79    0.15
   6 -17   3    1.02    0.20
   6 -17   3    0.89    0.18
   6  16  -3    0.91    0.25
   6  16  -3    0.99    0.15
  -6 -16   3    0.95    0.19
   5  16  -3    0.37    0.21
  -5 -16   3    0.54    0.20
   4  16  -3   -0.07    0.10
   4  16  -3   -0.18    0.20
  -4 -16   3    0.09    0.14
  -4 -16   3    0.12    0.17
   3  16  -3    3.24    0.36
  -3 -16   3    3.70    0.41
  -3 -16   3    3.87    0.42
   2  16  -3    0.21    0.11
  -2 -16   3    0.50    0.15
  -2 -16   3    0.30    0.15
  -2 -16   3    0.01    0.15
   1  16  -3    4.70    0.45
   0  16  -3    2.47    0.29
   0 -16   3    2.93    0.33
   0 -16   3    2.50    0.34
   0 -16   3    2.57    0.34
  -1  16  -3    0.78    0.14
   1 -16   3    0.74    0.17
   1 -16   3    0.81    0.17
   1 -16   3    0.46    0.16
  -2  16  -3    0.10    0.12
   2 -16   3    0.33    0.15
   2 -16   3    0.03    0.14
   2 -16   3    0.20    0.14
   2 -16   3    0.49    0.20
  -3  16  -3    0.15    0.12
   3 -16   3    0.24    0.14
   3 -16   3    0.23    0.17
   3 -16   3    0.25    0.15
   3 -16   3    0.22    0.14
  -4  16  -3    0.25    0.12
   4 -16   3    0.40    0.16
   4 -16   3    0.27    0.13
   4 -16   3    0.22    0.14
  -5  16  -3    0.88    0.15
   5 -16   3    1.15    0.19
   5 -16   3    1.12    0.19
   5 -16   3    0.98    0.19
  -6  16  -3    0.39    0.12
   6 -16   3    0.44    0.15
   6 -16   3    0.72    0.16
   6 -16   3    0.28    0.15
  -7  16  -3    1.54    0.23
   7 -16   3    1.77    0.25
   7 -16   3    1.77    0.24
   7 -16   3    2.14    0.28
  -8  16  -3    1.26    0.16
   8 -16   3    1.08    0.22
   8 -16   3    1.07    0.19
   7  15  -3    0.70    0.14
   7  15  -3    0.52    0.18
   6  15  -3    0.39    0.12
  -6 -15   3    0.41    0.24
  -6 -15   3    0.45    0.16
   5  15  -3    0.23    0.10
   5  15  -3    0.01    0.16
  -5 -15   3    0.00    0.19
  -5 -15   3    0.00    0.13
  -5 -15   3    0.10    0.17
   4  15  -3   -0.02    0.11
   4  15  -3   -0.18    0.15
  -4 -15   3    0.19    0.16
  -4 -15   3   -0.07    0.12
  -4 -15   3    0.09    0.15
   3  15  -3   -0.12    0.16
   3  15  -3    0.08    0.10
  -3 -15   3    0.13    0.15
  -3 -15   3   -0.07    0.15
  -3 -15   3   -0.04    0.12
  -3 -15   3   -0.01    0.13
   2  15  -3    4.49    0.55
   2  15  -3    5.77    0.51
  -2 -15   3    5.32    0.55
  -2 -15   3    5.86    0.51
  -2 -15   3    5.26    0.58
   1  15  -3    1.00    0.21
  -1 -15   3    0.69    0.15
  -1 -15   3    0.83    0.18
  -1 -15   3    0.87    0.18
  -1 -15   3    0.74    0.18
   0  15  -3    1.38    0.26
   0  15  -3    1.35    0.19
   0 -15   3    1.68    0.23
   0 -15   3    1.73    0.25
   0 -15   3    1.77    0.24
  -1  15  -3    1.47    0.20
   1 -15   3    1.73    0.24
   1 -15   3    0.94    0.20
   1 -15   3    1.47    0.23
   1 -15   3    1.00    0.20
  -2  15  -3    0.43    0.12
   2 -15   3    0.22    0.13
   2 -15   3    0.22    0.13
   2 -15   3    0.11    0.16
   2 -15   3    0.13    0.13
  -3  15  -3   -0.04    0.11
   3 -15   3   -0.06    0.12
   3 -15   3   -0.07    0.13
   3 -15   3   -0.13    0.14
   3 -15   3    0.00    0.13
  -4  15  -3    0.05    0.11
   4 -15   3    0.10    0.12
   4 -15   3    0.33    0.14
   4 -15   3    0.32    0.15
   4 -15   3   -0.12    0.13
  -5  15  -3    1.47    0.21
   5 -15   3    1.53    0.23
   5 -15   3    1.20    0.21
   5 -15   3    1.65    0.23
  -6  15  -3    1.22    0.16
   6 -15   3    1.16    0.19
   6 -15   3    1.24    0.21
  -7  15  -3    0.13    0.10
   7 -15   3    0.06    0.14
   7 -15   3    0.19    0.14
   7 -15   3    0.13    0.14
   8 -15   3    0.47    0.18
  -9  15  -3    1.86    0.23
   9 -15   3    1.86    0.28
   9 -15   3    1.75    0.29
   8  14  -3    0.11    0.12
   8  14  -3   -0.17    0.14
  -8 -14   3    0.13    0.15
   7  14  -3    0.09    0.15
   7  14  -3    0.49    0.11
  -7 -14   3    0.55    0.27
  -7 -14   3    0.12    0.15
   6  14  -3    1.71    0.22
   6  14  -3    1.26    0.23
  -6 -14   3    2.10    0.31
  -6 -14   3    1.91    0.26
  -6 -14   3    1.79    0.28
   5  14  -3    0.16    0.14
   5  14  -3    0.38    0.11
  -5 -14   3    0.12    0.13
  -5 -14   3    0.36    0.16
  -5 -14   3    0.32    0.14
  -5 -14   3    0.58    0.18
   4  14  -3    0.64    0.13
   4  14  -3    0.99    0.17
  -4 -14   3    0.54    0.15
  -4 -14   3    0.95    0.18
  -4 -14   3    0.91    0.18
  -4 -14   3    1.08    0.20
   3  14  -3    2.14    0.25
   3  14  -3    2.15    0.30
  -3 -14   3    2.13    0.31
  -3 -14   3    2.26    0.30
  -3 -14   3    2.35    0.27
  -3 -14   3    2.57    0.30
   2  14  -3    5.25    0.48
   2  14  -3    4.44    0.44
  -2 -14   3    5.27    0.51
  -2 -14   3    4.19    0.52
  -2 -14   3    4.65    0.45
   1  14  -3    0.95    0.13
  -1 -14   3    0.66    0.15
  -1 -14   3    0.73    0.17
  -1 -14   3    0.59    0.13
  -1 -14   3    1.06    0.19
   0  14  -3    0.54    0.12
   0 -14   3    0.55    0.14
   0 -14   3    0.50    0.12
   0 -14   3    0.77    0.17
   0 -14   3    0.89    0.16
  -1  14  -3    0.13    0.10
   1 -14   3    0.20    0.13
   1 -14   3    0.12    0.14
   1 -14   3    0.14    0.14
  -2  14  -3    0.69    0.12
   2 -14   3    0.56    0.16
   2 -14   3    0.64    0.16
   2 -14   3    0.41    0.16
   2 -14   3    0.48    0.17
  -3  14  -3    5.92    0.56
  -3  14  -3    5.80    0.51
   3 -14   3    5.20    0.57
   3 -14   3    5.34    0.58
   3 -14   3    5.24    0.56
  -4  14  -3   -0.01    0.19
  -4  14  -3    0.16    0.11
   4 -14   3    0.16    0.15
   4 -14   3    0.17    0.13
   4 -14   3    0.31    0.13
   4 -14   3    0.28    0.13
  -5  14  -3   -0.19    0.19
  -5  14  -3    0.11    0.10
   5 -14   3    0.17    0.13
   5 -14   3    0.06    0.12
   5 -14   3    0.00    0.12
  -6  14  -3    0.08    0.10
  -6  14  -3   -0.04    0.19
   6 -14   3    0.06    0.14
   6 -14   3    0.08    0.12
   6 -14   3    0.25    0.14
  -7  14  -3    2.11    0.25
  -7  14  -3    2.90    0.36
   7 -14   3    2.37    0.29
   7 -14   3    1.96    0.30
  -8  14  -3    0.16    0.10
   8 -14   3    0.23    0.16
   8 -14   3    0.13    0.13
  -9  14  -3    1.14    0.25
   9 -14   3    0.74    0.17
   9 -14   3    1.01    0.21
 -10  14  -3    0.15    0.11
  10 -14   3    0.46    0.17
   9  13  -3    0.01    0.14
   9  13  -3    0.03    0.13
  -9 -13   3    0.35    0.15
   8  13  -3    2.08    0.27
   8  13  -3    2.16    0.24
  -8 -13   3    1.84    0.28
   7  13  -3    0.01    0.10
   7  13  -3   -0.12    0.13
  -7 -13   3    0.03    0.13
  -7 -13   3    0.23    0.21
  -7 -13   3    0.23    0.21
   6  13  -3    0.54    0.15
   6  13  -3    0.44    0.12
  -6 -13   3    0.43    0.14
  -6 -13   3    0.45    0.19
  -6 -13   3    0.48    0.15
  -6 -13   3    0.57    0.17
   5  13  -3    0.40    0.14
   5  13  -3    0.21    0.10
  -5 -13   3    0.54    0.15
  -5 -13   3    0.23    0.13
  -5 -13   3    0.45    0.16
  -5 -13   3    0.07    0.13
   4  13  -3    0.19    0.14
   4  13  -3    0.29    0.11
  -4 -13   3    0.36    0.13
  -4 -13   3    0.35    0.16
  -4 -13   3    0.49    0.14
  -4 -13   3    0.32    0.14
   3  13  -3    4.06    0.42
   2  13  -3    2.07    0.27
   2  13  -3    2.44    0.23
  -2 -13   3    1.86    0.27
  -2 -13   3    1.91    0.28
  -2 -13   3    1.69    0.26
  -2 -13   3    1.90    0.24
   1  13  -3    2.49    0.27
   1  13  -3    2.41    0.31
  -1 -13   3    2.82    0.31
  -1 -13   3    2.59    0.31
  -1 -13   3    2.97    0.29
   0  13  -3    0.26    0.14
   0  13  -3    0.32    0.10
   0 -13   3    0.37    0.12
   0 -13   3    0.25    0.16
   0 -13   3    0.23    0.12
   0 -13   3    0.38    0.13
   0 -13   3    0.34    0.13
  -1  13  -3    0.30    0.16
  -1  13  -3   -0.06    0.09
   1 -13   3    0.00    0.13
   1 -13   3    0.18    0.11
   1 -13   3    0.25    0.10
   1 -13   3    0.00    0.11
   1 -13   3    0.00    0.08
  -2  13  -3    2.34    0.28
  -2  13  -3    2.69    0.33
   2 -13   3    2.87    0.33
   2 -13   3    2.76    0.32
   2 -13   3    2.79    0.32
  -3  13  -3   -0.17    0.15
  -3  13  -3   -0.18    0.09
   3 -13   3    0.09    0.12
   3 -13   3   -0.01    0.11
   3 -13   3    0.03    0.11
   3 -13   3    0.03    0.11
  -4  13  -3    1.34    0.20
  -4  13  -3    1.58    0.23
  -5  13  -3    4.27    0.38
   5 -13   3    3.80    0.41
   5 -13   3    3.45    0.45
   5 -13   3    3.57    0.41
  -6  13  -3    0.57    0.18
  -6  13  -3    0.84    0.13
   6 -13   3    0.88    0.17
   6 -13   3    0.38    0.18
   6 -13   3    0.96    0.17
  -7  13  -3    0.69    0.13
  -7  13  -3    0.84    0.18
   7 -13   3    0.93    0.17
   7 -13   3    0.65    0.17
   7 -13   3    0.73    0.18
   7 -13   3    0.69    0.16
  -8  13  -3    0.80    0.17
  -8  13  -3    0.41    0.11
   8 -13   3    0.36    0.16
   8 -13   3    0.45    0.17
   8 -13   3    0.59    0.15
   8 -13   3    0.51    0.16
  -9  13  -3    0.07    0.10
   9 -13   3   -0.09    0.15
   9 -13   3    0.10    0.17
   9 -13   3    0.14    0.13
 -10  13  -3   -0.19    0.19
  10 -13   3    0.17    0.24
  10 -13   3    0.13    0.18
 -11  13  -3    0.78    0.13
  11 -13   3    0.53    0.22
  10  12  -3    0.05    0.13
  10  12  -3   -0.08    0.18
 -10 -12   3    0.02    0.15
   9  12  -3   -0.04    0.12
   9  12  -3    0.23    0.13
  -9 -12   3    0.05    0.13
   8  12  -3    0.39    0.13
   8  12  -3    0.35    0.12
  -8 -12   3    0.38    0.14
  -8 -12   3    0.27    0.13
  -8 -12   3    0.38    0.27
   7  12  -3    0.53    0.12
   7  12  -3    0.74    0.15
  -7 -12   3    0.41    0.13
  -7 -12   3    0.57    0.20
  -7 -12   3    0.45    0.14
   6  12  -3    0.05    0.09
   6  12  -3    0.23    0.13
  -6 -12   3   -0.09    0.11
  -6 -12   3   -0.02    0.16
  -6 -12   3    0.23    0.11
  -6 -12   3    0.10    0.13
   5  12  -3    0.53    0.13
   5  12  -3    0.84    0.15
  -5 -12   3    0.80    0.15
  -5 -12   3    0.68    0.14
   4  12  -3    4.81    0.45
   4  12  -3    4.39    0.42
  -4 -12   3    4.30    0.49
  -4 -12   3    3.88    0.43
  -4 -12   3    4.60    0.43
  -4 -12   3    5.17    0.48
   3  12  -3   11.00    1.06
   3  12  -3   11.59    1.03
  -3 -12   3   12.12    1.01
  -3 -12   3   11.74    1.06
  -3 -12   3   11.86    1.16
   2  12  -3    0.77    0.14
   2  12  -3    0.59    0.11
  -2 -12   3    0.58    0.12
  -2 -12   3    0.44    0.13
  -2 -12   3    0.86    0.15
  -2 -12   3    0.68    0.11
  -2 -12   3    0.66    0.13
   1  12  -3    1.38    0.18
   1  12  -3    1.08    0.15
  -1 -12   3    0.85    0.14
  -1 -12   3    1.18    0.15
  -1 -12   3    0.95    0.16
  -1 -12   3    1.19    0.21
  -1 -12   3    1.26    0.19
  -1 -12   3    1.03    0.17
   0  12  -3    9.59    0.85
   0  12  -3    9.01    0.88
   0 -12   3    8.93    0.84
   0 -12   3   10.57    0.97
   0 -12   3   10.15    0.91
  -1  12  -3    0.33    0.13
  -1  12  -3    0.21    0.09
   1 -12   3    0.27    0.11
   1 -12   3    0.35    0.12
   1 -12   3    0.45    0.11
   1 -12   3    0.37    0.12
   1 -12   3    0.55    0.12
  -2  12  -3    3.15    0.32
   2 -12   3    3.45    0.38
   2 -12   3    3.69    0.36
   2 -12   3    3.55    0.36
   2 -12   3    2.74    0.32
  -3  12  -3    0.14    0.13
  -3  12  -3    0.10    0.09
   3 -12   3   -0.04    0.11
   3 -12   3    0.16    0.12
   3 -12   3    0.17    0.09
   3 -12   3    0.20    0.12
  -4  12  -3    0.59    0.15
  -4  12  -3    0.52    0.11
   4 -12   3    0.61    0.13
   4 -12   3    0.50    0.14
   4 -12   3    0.49    0.18
   4 -12   3    0.47    0.15
   4 -12   3    0.38    0.11
  -5  12  -3    4.57    0.45
   5 -12   3    4.86    0.51
   5 -12   3    4.75    0.51
   5 -12   3    4.87    0.49
   6 -12   3    0.39    0.14
   6 -12   3    0.43    0.14
   6 -12   3    0.65    0.15
  -7  12  -3    0.67    0.15
  -7  12  -3    0.44    0.11
   7 -12   3    0.33    0.14
   7 -12   3    0.45    0.15
   7 -12   3    0.30    0.14
   7 -12   3    0.31    0.15
  -8  12  -3    6.48    0.57
  -8  12  -3    5.90    0.60
   8 -12   3    5.77    0.64
   8 -12   3    6.11    0.64
   8 -12   3    6.49    0.63
   8 -12   3    6.41    0.62
  -9  12  -3   -0.11    0.09
  -9  12  -3   -0.17    0.13
   9 -12   3   -0.07    0.14
   9 -12   3    0.05    0.14
   9 -12   3    0.26    0.18
 -10  12  -3    0.32    0.15
 -10  12  -3    0.10    0.11
  10 -12   3    0.48    0.17
 -11  12  -3    0.40    0.15
 -11  12  -3    0.49    0.12
  11 -12   3    0.04    0.19
  11 -12   3    0.43    0.15
  11  11  -3    0.85    0.15
 -11 -11   3    0.42    0.15
 -11 -11   3    0.37    0.17
  10  11  -3    0.12    0.12
 -10 -11   3   -0.05    0.13
   9  11  -3    0.49    0.13
   9  11  -3    0.46    0.14
  -9 -11   3    0.28    0.14
  -9 -11   3    0.34    0.13
   8  11  -3    0.73    0.15
   8  11  -3    0.66    0.13
  -8 -11   3    0.60    0.14
  -8 -11   3    0.90    0.25
  -8 -11   3    0.44    0.14
   7  11  -3    0.97    0.17
   7  11  -3    0.99    0.15
  -7 -11   3    0.76    0.17
  -7 -11   3    1.00    0.21
  -7 -11   3    0.57    0.16
  -7 -11   3    0.79    0.14
  -6 -11   3    0.66    0.18
   5  11  -3    0.96    0.14
   5  11  -3    0.64    0.15
  -5 -11   3    1.07    0.15
  -5 -11   3    1.45    0.19
  -5 -11   3    0.97    0.18
  -5 -11   3    1.20    0.16
   4  11  -3    0.23    0.11
   4  11  -3    0.29    0.09
  -4 -11   3    0.41    0.11
  -4 -11   3    0.34    0.14
  -4 -11   3    0.28    0.09
  -4 -11   3    0.38    0.09
   3  11  -3    0.31    0.11
   3  11  -3    0.35    0.09
  -3 -11   3    0.41    0.11
  -3 -11   3    0.40    0.13
  -3 -11   3    0.53    0.12
  -3 -11   3    0.41    0.09
   2  11  -3    0.67    0.13
   2  11  -3    0.35    0.10
   2  11  -3    0.82    0.11
  -2 -11   3    0.50    0.11
  -2 -11   3    0.84    0.15
  -2 -11   3    0.61    0.10
  -2 -11   3    0.61    0.12
   1  11  -3    1.40    0.18
   1  11  -3    1.65    0.18
   1  11  -3    1.45    0.22
  -1 -11   3    1.73    0.19
  -1 -11   3    1.47    0.20
  -1 -11   3    1.95    0.18
  -1 -11   3    1.64    0.19
  -1 -11   3    1.65    0.22
  -1 -11   3    1.71    0.21
   0  11  -3    2.48    0.24
   0  11  -3    2.44    0.23
   0  11  -3    1.97    0.26
   0 -11   3    2.04    0.26
   0 -11   3    2.26    0.28
   0 -11   3    2.32    0.25
   0 -11   3    2.50    0.27
   0 -11   3    2.68    0.29
  -1  11  -3    0.33    0.09
  -1  11  -3    0.23    0.07
  -1  11  -3    0.22    0.11
   1 -11   3    0.40    0.12
   1 -11   3    0.29    0.08
   1 -11   3    0.22    0.09
   1 -11   3    0.36    0.09
   1 -11   3    0.34    0.10
   1 -11   3    0.44    0.13
  -2  11  -3    1.55    0.18
  -2  11  -3    1.55    0.19
  -2  11  -3    2.16    0.23
   2 -11   3    1.72    0.20
   2 -11   3    1.84    0.23
   2 -11   3    1.84    0.24
   2 -11   3    1.55    0.20
   2 -11   3    2.10    0.23
  -3  11  -3    0.09    0.08
  -3  11  -3    0.16    0.11
  -3  11  -3    0.02    0.08
   3 -11   3    0.15    0.08
   3 -11   3    0.16    0.15
   3 -11   3    0.05    0.10
   3 -11   3    0.12    0.10
   3 -11   3    0.09    0.09
   3 -11   3    0.24    0.09
  -4  11  -3    0.49    0.14
  -4  11  -3    0.55    0.11
   4 -11   3    0.43    0.11
   4 -11   3    0.62    0.13
   4 -11   3    0.58    0.15
   4 -11   3    0.67    0.10
   4 -11   3    0.46    0.13
  -5  11  -3    5.91    0.61
   5 -11   3    6.58    0.63
   5 -11   3    6.56    0.64
   5 -11   3    6.44    0.59
  -6  11  -3    2.75    0.30
  -6  11  -3    3.23    0.35
   6 -11   3    2.66    0.32
   6 -11   3    3.35    0.35
   6 -11   3    3.48    0.35
   7 -11   3    0.19    0.12
   7 -11   3   -0.01    0.12
   7 -11   3    0.02    0.12
  -8  11  -3    2.30    0.28
  -8  11  -3    1.92    0.25
   8 -11   3    2.61    0.29
   8 -11   3    2.09    0.31
   8 -11   3    2.11    0.29
   8 -11   3    2.25    0.30
  -9  11  -3    3.08    0.30
  -9  11  -3    2.70    0.27
   9 -11   3    1.94    0.32
   9 -11   3    2.22    0.32
   9 -11   3    2.68    0.36
 -10  11  -3   -0.07    0.10
 -10  11  -3    0.01    0.13
  10 -11   3    0.09    0.13
  10 -11   3    0.16    0.20
  10 -11   3   -0.30    0.15
 -11  11  -3    0.87    0.13
  11 -11   3    0.64    0.21
  11 -11   3    0.48    0.15
 -12  11  -3    0.28    0.13
 -12  11  -3   -0.03    0.12
  12 -11   3    0.15    0.14
 -11 -10   3    0.43    0.14
  10  10  -3    0.98    0.16
  10  10  -3    0.49    0.15
 -10 -10   3    0.70    0.14
   9  10  -3    0.10    0.11
   9  10  -3    0.07    0.12
  -9 -10   3    0.00    0.11
   8  10  -3    0.82    0.15
   8  10  -3    0.81    0.14
  -8 -10   3    0.32    0.22
  -8 -10   3    0.66    0.14
  -7 -10   3    0.54    0.16
  -7 -10   3    0.64    0.18
   6  10  -3    0.53    0.12
   6  10  -3    0.94    0.14
  -6 -10   3    0.98    0.18
  -6 -10   3    0.72    0.13
  -6 -10   3    0.55    0.14
   5  10  -3    0.19    0.08
   5  10  -3    0.27    0.10
  -5 -10   3    0.16    0.09
  -5 -10   3    0.14    0.12
  -5 -10   3    0.12    0.08
   4  10  -3    0.29    0.10
   4  10  -3    0.22    0.10
   4  10  -3    0.27    0.08
  -4 -10   3    0.44    0.09
  -4 -10   3    0.41    0.10
  -4 -10   3    0.51    0.13
  -4 -10   3    0.28    0.11
   3  10  -3    4.24    0.41
  -3 -10   3    4.93    0.42
   2  10  -3    0.32    0.08
   2  10  -3    0.30    0.09
  -2 -10   3    0.46    0.13
  -2 -10   3    0.37    0.09
  -2 -10   3    0.40    0.08
  -2 -10   3    0.42    0.09
   1  10  -3    9.99    0.80
  -1 -10   3    9.10    0.83
  -1 -10   3   10.08    0.92
  -1 -10   3    9.37    0.96
   0  10  -3    0.36    0.08
   0  10  -3    0.26    0.05
   0  10  -3    0.39    0.10
   0 -10   3    0.26    0.07
   0 -10   3    0.18    0.08
   0 -10   3    0.25    0.11
   0 -10   3    0.29    0.08
   0 -10   3    0.15    0.10
  -1  10  -3    0.27    0.08
  -1  10  -3    0.38    0.11
  -1  10  -3    0.40    0.06
   1 -10   3    0.23    0.07
   1 -10   3    0.32    0.08
   1 -10   3    0.19    0.10
   1 -10   3    0.39    0.08
   1 -10   3    0.19    0.11
  -2  10  -3   11.55    1.05
  -2  10  -3   12.34    1.08
   2 -10   3   11.97    1.08
   2 -10   3   12.25    1.15
  -3  10  -3    0.92    0.12
  -3  10  -3    0.91    0.15
   3 -10   3    1.08    0.16
   3 -10   3    0.91    0.16
   3 -10   3    1.16    0.16
   3 -10   3    1.11    0.14
   3 -10   3    0.76    0.16
  -4  10  -3    0.50    0.09
  -4  10  -3    0.38    0.10
  -4  10  -3    0.76    0.13
   4 -10   3    0.73    0.14
   4 -10   3    0.66    0.12
   4 -10   3    0.81    0.10
   4 -10   3    0.33    0.11
   4 -10   3    0.59    0.12
  -5  10  -3    0.48    0.11
  -5  10  -3    0.65    0.13
  -5  10  -3    0.75    0.11
   5 -10   3    0.73    0.12
   5 -10   3    0.40    0.13
   5 -10   3    0.59    0.14
   5 -10   3    0.59    0.14
   5 -10   3    0.60    0.10
  -6  10  -3    0.22    0.09
  -6  10  -3    0.24    0.11
   6 -10   3    0.14    0.09
   6 -10   3    0.25    0.11
   6 -10   3    0.19    0.12
   6 -10   3    0.03    0.11
  -7  10  -3    0.54    0.11
  -7  10  -3    0.78    0.15
   7 -10   3    0.78    0.15
   7 -10   3    0.99    0.15
   7 -10   3    0.87    0.13
   7 -10   3    0.48    0.13
  -8  10  -3    0.79    0.16
  -8  10  -3    0.80    0.13
   8 -10   3    0.98    0.18
   8 -10   3    0.93    0.16
   8 -10   3    0.77    0.17
   8 -10   3    0.61    0.16
  -9  10  -3    0.48    0.11
  -9  10  -3    0.24    0.14
   9 -10   3    0.29    0.13
   9 -10   3    0.50    0.17
   9 -10   3    0.42    0.15
   9 -10   3    0.36    0.16
 -10  10  -3    0.79    0.13
 -10  10  -3    0.26    0.14
  10 -10   3    0.89    0.22
  10 -10   3    0.66    0.15
  10 -10   3    0.38    0.17
  10 -10   3    0.50    0.14
 -11  10  -3   -0.01    0.13
 -11  10  -3    0.15    0.10
  11 -10   3   -0.16    0.19
  11 -10   3   -0.21    0.12
 -12  10  -3    0.70    0.14
 -12  10  -3    0.58    0.13
  12 -10   3    0.44    0.14
  12   9  -3    0.04    0.14
 -12  -9   3    0.13    0.12
  11   9  -3    0.54    0.26
  11   9  -3    0.43    0.14
 -11  -9   3    0.48    0.13
  10   9  -3    0.66    0.24
  10   9  -3    0.70    0.15
  10   9  -3    0.37    0.15
 -10  -9   3    0.37    0.12
   9   9  -3    0.94    0.15
   9   9  -3    0.71    0.23
   9   9  -3    0.68    0.15
  -9  -9   3    0.62    0.13
   8   9  -3    0.20    0.21
   8   9  -3    0.07    0.11
   8   9  -3   -0.03    0.09
  -8  -9   3    0.18    0.10
  -8  -9   3    0.27    0.20
   7   9  -3    0.14    0.08
   7   9  -3    0.37    0.21
   7   9  -3    0.28    0.11
  -7  -9   3    0.13    0.09
  -7  -9   3    0.29    0.16
  -7  -9   3    0.01    0.13
   6   9  -3    0.05    0.07
   6   9  -3    0.09    0.20
   6   9  -3   -0.04    0.09
  -6  -9   3   -0.05    0.11
  -6  -9   3   -0.05    0.13
  -6  -9   3    0.07    0.08
   5   9  -3    1.47    0.19
   5   9  -3    1.14    0.16
   5   9  -3    1.42    0.17
  -5  -9   3    1.50    0.18
  -5  -9   3    1.39    0.18
  -5  -9   3    1.60    0.22
   4   9  -3    6.51    0.51
   4   9  -3    5.78    0.53
  -4  -9   3    6.23    0.52
  -4  -9   3    5.58    0.55
  -4  -9   3    5.75    0.60
   3   9  -3    0.10    0.06
   3   9  -3    0.11    0.06
   3   9  -3    0.06    0.07
  -3  -9   3   -0.01    0.07
  -3  -9   3    0.17    0.09
  -3  -9   3    0.06    0.06
  -3  -9   3    0.04    0.07
   2   9  -3    2.47    0.21
   2   9  -3    2.18    0.22
  -2  -9   3    2.21    0.23
  -2  -9   3    2.46    0.25
  -2  -9   3    1.80    0.23
   1   9  -3   35.33    2.98
  -1  -9   3   38.02    3.53
  -1   9  -3    6.06    0.48
  -1   9  -3    5.55    0.53
   1  -9   3    5.47    0.50
  -2   9  -3    0.32    0.09
  -2   9  -3    0.03    0.04
   2  -9   3    0.14    0.07
   2  -9   3    0.04    0.07
   2  -9   3    0.09    0.06
   2  -9   3    0.17    0.08
  -3   9  -3    1.32    0.12
  -3   9  -3    0.94    0.14
  -3   9  -3    1.00    0.16
   3  -9   3    1.23    0.14
  -4   9  -3    0.06    0.05
  -4   9  -3    0.10    0.10
  -4   9  -3    0.06    0.07
   4  -9   3    0.04    0.07
   4  -9   3   -0.07    0.06
   4  -9   3    0.03    0.07
   4  -9   3    0.06    0.10
  -5   9  -3    0.66    0.10
  -5   9  -3    0.83    0.11
  -5   9  -3    0.67    0.13
   5  -9   3    0.96    0.14
   5  -9   3    0.62    0.12
   5  -9   3    0.87    0.13
   5  -9   3    1.09    0.13
  -6   9  -3    2.96    0.30
  -6   9  -3    3.24    0.30
   6  -9   3    3.33    0.33
   6  -9   3    2.85    0.32
  -7   9  -3    2.51    0.27
  -7   9  -3    2.32    0.24
   7  -9   3    2.56    0.28
   7  -9   3    2.01    0.27
   7  -9   3    2.24    0.25
   7  -9   3    1.97    0.25
  -8   9  -3   -0.05    0.09
  -8   9  -3   -0.03    0.11
   8  -9   3   -0.14    0.09
   8  -9   3    0.17    0.14
   8  -9   3    0.05    0.12
  -9   9  -3   -0.06    0.09
  -9   9  -3   -0.14    0.12
   9  -9   3    0.19    0.16
   9  -9   3   -0.05    0.11
   9  -9   3    0.02    0.14
 -10   9  -3    0.30    0.11
 -10   9  -3    0.33    0.14
  10  -9   3    0.52    0.17
  10  -9   3    0.67    0.14
  10  -9   3    0.82    0.23
 -11   9  -3    0.02    0.12
 -11   9  -3    0.31    0.11
  11  -9   3    0.25    0.13
  11  -9   3   -0.09    0.21
  11  -9   3    0.08    0.13
 -12   9  -3   -0.03    0.13
  12  -9   3    0.19    0.13
  12   8  -3    0.33    0.22
 -12  -8   3    0.37    0.13
  11   8  -3    1.93    0.27
  11   8  -3    1.78    0.25
 -11  -8   3    1.53    0.23
  10   8  -3   -0.04    0.12
  10   8  -3    0.18    0.18
  10   8  -3   -0.02    0.14
 -10  -8   3   -0.05    0.10
   9   8  -3    0.09    0.12
   9   8  -3   -0.02    0.18
   9   8  -3    0.24    0.12
  -9  -8   3    0.08    0.10
   8   8  -3    0.58    0.17
   8   8  -3    0.36    0.31
   8   8  -3    0.56    0.15
   8   8  -3    0.82    0.13
  -8  -8   3    0.82    0.20
  -8  -8   3    0.67    0.13
   7   8  -3    0.67    0.12
   7   8  -3    0.45    0.18
  -7  -8   3    0.92    0.13
  -7  -8   3    0.66    0.17
  -7  -8   3    0.63    0.15
   6   8  -3    0.55    0.11
   6   8  -3    0.47    0.15
   6   8  -3    0.31    0.09
  -6  -8   3    0.29    0.11
  -6  -8   3    0.26    0.13
  -6  -8   3    0.30    0.09
   5   8  -3    0.23    0.08
   5   8  -3    0.15    0.14
   5   8  -3    0.06    0.08
   5   8  -3    0.14    0.07
  -5  -8   3    0.14    0.11
  -5  -8   3    0.13    0.06
  -5  -8   3    0.23    0.08
   4   8  -3    3.05    0.30
   4   8  -3    3.70    0.32
  -4  -8   3    3.30    0.32
  -4  -8   3    3.12    0.31
   3   8  -3    0.39    0.07
   3   8  -3    0.41    0.08
   3   8  -3    0.39    0.13
  -3  -8   3    0.49    0.10
  -3  -8   3    0.28    0.07
  -3  -8   3    0.31    0.07
   2   8  -3   43.25    3.53
   2   8  -3   42.21    3.73
  -2  -8   3   44.58    3.63
   1   8  -3   30.93    2.60
  -1  -8   3   31.43    2.67
  -1  -8   3   32.23    3.07
  -1  -8   3   32.83    2.97
   0   8  -3   -0.05    0.06
   0   8  -3    0.03    0.03
   0   8  -3    0.04    0.07
   0   8  -3   -0.04    0.06
   0  -8   3    0.06    0.06
   0  -8   3    0.00    0.05
   0  -8   3   -0.05    0.05
   0  -8   3   -0.01    0.06
   0  -8   3   -0.03    0.06
  -1   8  -3    1.61    0.18
  -1   8  -3    1.88    0.21
  -1   8  -3    1.76    0.18
   1  -8   3    1.83    0.22
   1  -8   3    1.76    0.18
   1  -8   3    1.90    0.19
   1  -8   3    1.67    0.18
  -2   8  -3    9.66    0.88
   2  -8   3   10.17    1.00
   2  -8   3   10.50    0.83
  -3   8  -3    1.18    0.18
  -3   8  -3    1.79    0.15
  -3   8  -3    1.38    0.19
   3  -8   3    1.68    0.17
   3  -8   3    1.46    0.18
   3  -8   3    1.39    0.19
   3  -8   3    1.75    0.18
   3  -8   3    1.37    0.20
  -4   8  -3    0.44    0.06
  -4   8  -3    0.53    0.11
  -4   8  -3    0.52    0.09
   4  -8   3    0.37    0.08
   4  -8   3    0.38    0.10
   4  -8   3    0.64    0.11
  -5   8  -3    1.57    0.17
  -5   8  -3    1.38    0.17
   5  -8   3    1.82    0.19
  -6   8  -3    7.70    0.63
  -6   8  -3    6.36    0.57
   6  -8   3    6.27    0.64
   6  -8   3    6.61    0.62
  -7   8  -3    1.21    0.18
   7  -8   3    1.76    0.22
   7  -8   3    1.55    0.22
   7  -8   3    1.87    0.21
   7  -8   3    1.45    0.19
  -8   8  -3    0.04    0.08
  -8   8  -3    0.05    0.11
   8  -8   3    0.01    0.14
   8  -8   3    0.09    0.09
   8  -8   3    0.06    0.11
  -9   8  -3    1.65    0.24
  -9   8  -3    1.85    0.22
   9  -8   3    1.80    0.24
 -10   8  -3   -0.19    0.12
 -10   8  -3    0.02    0.10
  10  -8   3   -0.26    0.16
  10  -8   3   -0.17    0.11
  10  -8   3    0.06    0.23
 -11   8  -3    0.15    0.11
 -11   8  -3    0.29    0.13
  11  -8   3    0.18    0.24
  11  -8   3    0.20    0.12
 -12   8  -3   -0.12    0.11
 -12   8  -3   -0.12    0.11
  12  -8   3    0.06    0.12
 -13   8  -3    0.07    0.12
  13  -8   3   -0.18    0.13
  13   7  -3    0.30    0.17
  13   7  -3    0.09    0.20
 -13  -7   3    0.04    0.12
  12   7  -3    0.31    0.15
  12   7  -3    0.61    0.18
 -12  -7   3    0.51    0.13
  11   7  -3    1.06    0.20
  11   7  -3    1.11    0.18
 -11  -7   3    0.77    0.15
  10   7  -3    0.00    0.14
  10   7  -3    0.42    0.16
  10   7  -3    0.25    0.13
 -10  -7   3    0.12    0.12
   9   7  -3    2.83    0.34
   9   7  -3    2.80    0.31
  -9  -7   3    2.83    0.36
   8   7  -3    0.26    0.22
   8   7  -3    0.14    0.09
   8   7  -3    0.22    0.10
   8   7  -3    0.00    0.13
  -8  -7   3    0.37    0.18
  -8  -7   3    0.12    0.14
  -8  -7   3    0.21    0.10
   7   7  -3    0.23    0.09
   7   7  -3    0.12    0.13
   7   7  -3    0.32    0.15
   7   7  -3    0.10    0.07
  -7  -7   3    0.04    0.14
  -7  -7   3    0.08    0.08
  -7  -7   3    0.20    0.12
  -7  -7   3   -0.09    0.12
   6   7  -3    1.43    0.16
   6   7  -3    1.22    0.18
   6   7  -3    1.17    0.14
   6   7  -3    0.85    0.14
  -6  -7   3    1.03    0.15
  -6  -7   3    1.20    0.18
  -6  -7   3    0.90    0.14
  -6  -7   3    1.08    0.15
   5   7  -3    0.07    0.07
   5   7  -3    0.04    0.06
   5   7  -3    0.08    0.12
   5   7  -3   -0.01    0.07
  -5  -7   3   -0.05    0.10
  -5  -7   3    0.27    0.10
  -5  -7   3    0.00    0.05
  -5  -7   3    0.09    0.07
   4   7  -3    2.93    0.30
   4   7  -3    3.35    0.28
   4   7  -3    2.74    0.34
   4   7  -3    3.18    0.29
   3   7  -3    0.08    0.07
   3   7  -3    0.06    0.08
   3   7  -3    0.09    0.04
   3   7  -3   -0.02    0.05
   3   7  -3    0.14    0.13
  -3  -7   3    0.13    0.10
  -3  -7   3    0.02    0.05
  -3  -7   3    0.01    0.06
  -3  -7   3    0.00    0.06
  -3  -7   3    0.02    0.06
   2   7  -3    8.08    0.72
   2   7  -3    8.67    0.69
  -2  -7   3    8.06    0.81
   1   7  -3   12.69    1.01
   1   7  -3   12.13    1.01
  -1  -7   3   12.15    1.16
   0   7  -3    0.28    0.05
   0   7  -3    0.29    0.08
   0   7  -3    0.45    0.07
   0   7  -3    0.44    0.07
   0  -7   3    0.28    0.08
   0  -7   3    0.38    0.06
   0  -7   3    0.35    0.06
   0  -7   3    0.37    0.09
  -1   7  -3    0.73    0.10
  -1   7  -3    0.63    0.09
  -1   7  -3    0.89    0.11
   1  -7   3    0.86    0.09
   1  -7   3    0.64    0.10
   1  -7   3    1.00    0.14
  -2   7  -3    0.62    0.08
  -2   7  -3    0.81    0.11
   2  -7   3    0.83    0.10
   2  -7   3    0.64    0.08
   2  -7   3    0.56    0.09
  -3   7  -3    6.27    0.57
  -3   7  -3    7.13    0.61
   3  -7   3    6.67    0.67
   3  -7   3    6.33    0.65
   3  -7   3    7.22    0.62
   3  -7   3    6.66    0.56
  -4   7  -3    0.03    0.07
  -4   7  -3   -0.01    0.04
  -4   7  -3    0.03    0.10
   4  -7   3    0.01    0.05
   4  -7   3    0.00    0.07
   4  -7   3    0.09    0.08
   4  -7   3    0.08    0.08
   4  -7   3   -0.02    0.06
  -5   7  -3    0.61    0.11
  -5   7  -3    0.49    0.08
  -5   7  -3    0.41    0.07
   5  -7   3    0.41    0.08
   5  -7   3    0.25    0.09
   5  -7   3    0.49    0.10
   6  -7   3    9.51    0.91
   6  -7   3    9.48    0.87
  -7   7  -3    0.06    0.11
  -7   7  -3    0.05    0.07
  -7   7  -3    0.12    0.09
   7  -7   3   -0.02    0.08
   7  -7   3    0.14    0.08
   7  -7   3    0.12    0.10
   7  -7   3   -0.04    0.10
  -8   7  -3    1.66    0.22
  -8   7  -3    1.33    0.18
   8  -7   3    1.50    0.22
   8  -7   3    1.76    0.21
   8  -7   3    1.89    0.23
  -9   7  -3    0.57    0.13
  -9   7  -3    0.30    0.10
   9  -7   3    0.49    0.18
   9  -7   3    0.31    0.15
   9  -7   3    0.61    0.13
 -10   7  -3    1.06    0.17
  10  -7   3    1.21    0.18
  10  -7   3    1.43    0.23
 -11   7  -3    0.04    0.12
 -11   7  -3    0.15    0.11
  11  -7   3    0.13    0.12
 -12   7  -3   -0.10    0.11
 -12   7  -3   -0.13    0.13
  12  -7   3   -0.19    0.11
  12  -7   3    0.32    0.13
 -13   7  -3   -0.11    0.12
  13  -7   3    0.16    0.15
  13  -7   3   -0.07    0.13
  13   6  -3    0.22    0.17
  13   6  -3   -0.06    0.17
 -13  -6   3   -0.07    0.13
  12   6  -3    0.68    0.17
  12   6  -3    0.27    0.16
 -12  -6   3    0.66    0.14
  11   6  -3   -0.11    0.13
  11   6  -3    0.16    0.14
 -11  -6   3    0.27    0.18
 -11  -6   3    0.20    0.12
  10   6  -3    1.84    0.25
  10   6  -3    2.15    0.29
  10   6  -3    2.22    0.27
 -10  -6   3    1.77    0.26
 -10  -6   3    2.49    0.27
   9   6  -3    3.50    0.38
   9   6  -3    3.19    0.39
   9   6  -3    3.84    0.42
   9   6  -3    4.77    0.59
  -9  -6   3    4.19    0.40
  -9  -6   3    4.20    0.40
   8   6  -3    1.96    0.26
   8   6  -3    2.40    0.30
   8   6  -3    1.68    0.21
   8   6  -3    1.87    0.23
  -8  -6   3    2.11    0.24
  -8  -6   3    1.52    0.22
   7   6  -3    0.15    0.13
   7   6  -3    0.44    0.08
   7   6  -3    0.09    0.12
   7   6  -3    0.31    0.10
  -7  -6   3    0.39    0.15
  -7  -6   3    0.21    0.10
  -7  -6   3    0.35    0.14
  -7  -6   3    0.25    0.09
   6   6  -3    2.25    0.24
   6   6  -3    2.61    0.23
  -6  -6   3    2.01    0.24
  -6  -6   3    2.16    0.24
   5   6  -3    0.91    0.12
   5   6  -3    1.13    0.13
   5   6  -3    0.95    0.14
   5   6  -3    1.03    0.16
   5   6  -3    1.14    0.19
  -5  -6   3    1.03    0.13
  -5  -6   3    1.25    0.17
  -5  -6   3    1.25    0.14
   4   6  -3    1.65    0.16
   4   6  -3    1.36    0.20
   4   6  -3    1.56    0.20
  -4  -6   3    1.33    0.17
  -4  -6   3    1.69    0.17
   2   6  -3    2.05    0.19
   2   6  -3    1.98    0.20
  -2  -6   3    2.19    0.20
  -2  -6   3    2.05    0.19
   1   6  -3   22.00    1.83
   1   6  -3   21.86    1.73
  -1  -6   3   20.73    2.05
  -1  -6   3   21.19    1.73
  -1  -6   3   20.32    1.90
   0   6  -3    7.98    0.66
   1  -6   3    2.02    0.19
   1  -6   3    1.63    0.19
  -2   6  -3    1.12    0.11
  -2   6  -3    0.86    0.13
  -2   6  -3    1.22    0.12
   2  -6   3    1.05    0.15
   2  -6   3    1.10    0.13
  -3   6  -3   24.93    2.14
  -3   6  -3   24.66    2.03
  -4   6  -3   28.59    2.37
  -4   6  -3   28.78    2.37
   4  -6   3   30.03    2.60
   4  -6   3   28.68    2.37
  -5   6  -3    1.50    0.17
  -5   6  -3    1.27    0.14
   5  -6   3    1.36    0.16
   5  -6   3    1.11    0.15
   5  -6   3    1.26    0.19
   5  -6   3    1.49    0.19
  -6   6  -3    0.05    0.07
  -6   6  -3    0.00    0.05
  -6   6  -3   -0.02    0.06
  -6   6  -3   -0.06    0.13
   6  -6   3   -0.04    0.08
   6  -6   3    0.07    0.06
   6  -6   3    0.08    0.06
   6  -6   3    0.09    0.08
  -7   6  -3    4.33    0.38
  -7   6  -3    3.70    0.36
   7  -6   3    4.23    0.41
   7  -6   3    3.47    0.38
  -8   6  -3    0.01    0.07
  -8   6  -3   -0.08    0.16
  -8   6  -3    0.09    0.09
   8  -6   3    0.22    0.11
   8  -6   3   -0.20    0.13
   8  -6   3    0.08    0.09
  -9   6  -3    0.16    0.09
  -9   6  -3   -0.15    0.19
  -9   6  -3    0.18    0.10
   9  -6   3    0.07    0.15
   9  -6   3    0.27    0.10
   9  -6   3    0.11    0.18
 -10   6  -3    0.15    0.22
 -10   6  -3    0.17    0.13
 -10   6  -3    0.16    0.10
  10  -6   3    0.03    0.19
  10  -6   3    0.27    0.11
 -11   6  -3    0.53    0.14
 -11   6  -3    0.66    0.13
 -11   6  -3    0.72    0.27
  11  -6   3    0.53    0.14
 -12   6  -3    0.31    0.14
 -12   6  -3    0.04    0.11
  12  -6   3    0.18    0.12
  13  -6   3    0.09    0.13
  13  -6   3    0.01    0.12
  13   5  -3    0.13    0.15
  13   5  -3    0.35    0.19
 -13  -5   3    0.31    0.13
  12   5  -3    1.78    0.24
  12   5  -3    1.27    0.23
 -12  -5   3    2.06    0.25
 -12  -5   3    1.66    0.25
  11   5  -3    8.32    0.74
 -11  -5   3    7.43    0.75
  10   5  -3    6.07    0.61
 -10  -5   3    6.87    0.63
   9   5  -3    2.58    0.30
   9   5  -3    2.20    0.27
   9   5  -3    2.60    0.28
   9   5  -3    3.06    0.41
  -9  -5   3    2.21    0.28
   8   5  -3    1.48    0.17
   8   5  -3    0.80    0.18
   8   5  -3    1.13    0.20
   8   5  -3    1.15    0.16
  -8  -5   3    1.09    0.16
  -8  -5   3    0.95    0.16
   7   5  -3    0.00    0.11
   7   5  -3   -0.10    0.09
   7   5  -3   -0.05    0.06
   7   5  -3    0.00    0.07
  -7  -5   3   -0.19    0.13
  -7  -5   3   -0.16    0.13
  -7  -5   3   -0.08    0.07
  -7  -5   3    0.04    0.06
   6   5  -3    3.06    0.31
   6   5  -3    3.24    0.30
  -6  -5   3    3.06    0.31
  -6  -5   3    3.05    0.32
  -6  -5   3    3.39    0.36
   5   5  -3    0.19    0.06
   5   5  -3    0.26    0.12
   5   5  -3    0.11    0.06
   5   5  -3    0.09    0.07
  -5  -5   3    0.19    0.08
  -5  -5   3    0.11    0.11
  -5  -5   3    0.03    0.06
  -5  -5   3    0.14    0.08
   4   5  -3    4.04    0.37
   4   5  -3    3.61    0.35
  -4  -5   3    4.12    0.34
  -4  -5   3    3.37    0.32
   3   5  -3   15.94    1.38
  -2  -5   3   33.12    2.70
  -1  -5   3   10.18    0.99
  -1  -5   3   11.65    0.90
   0  -5   3   77.03    6.06
   0  -5   3   76.32    6.06
   0  -5   3   70.44    6.23
  -1   5  -3   16.29    1.33
  -2   5  -3    0.03    0.03
  -2   5  -3   -0.01    0.06
  -2   5  -3    0.01    0.04
   2  -5   3    0.07    0.07
   2  -5   3    0.01    0.05
   2  -5   3    0.02    0.03
   2  -5   3    0.09    0.06
   2  -5   3    0.04    0.03
   2  -5   3    0.01    0.05
  -3   5  -3    0.42    0.06
  -3   5  -3    0.28    0.08
  -3   5  -3    0.30    0.07
  -3   5  -3    0.43    0.07
   3  -5   3    0.44    0.09
   3  -5   3    0.55    0.08
   3  -5   3    0.49    0.07
   3  -5   3    0.50    0.09
  -4   5  -3    1.79    0.18
  -4   5  -3    1.41    0.14
  -4   5  -3    1.78    0.23
  -4   5  -3    1.74    0.16
   4  -5   3    1.64    0.20
   4  -5   3    1.31    0.16
   4  -5   3    1.54    0.18
  -5   5  -3    0.30    0.12
  -5   5  -3    0.28    0.06
  -5   5  -3    0.24    0.06
  -5   5  -3    0.17    0.12
   5  -5   3    0.29    0.08
   5  -5   3    0.24    0.09
   5  -5   3    0.46    0.10
   5  -5   3    0.26    0.08
   5  -5   3    0.30    0.09
  -6   5  -3    0.67    0.10
  -6   5  -3    0.94    0.15
  -6   5  -3    0.73    0.10
  -6   5  -3    0.95    0.13
   6  -5   3    0.67    0.12
   6  -5   3    0.79    0.13
   6  -5   3    0.92    0.13
   6  -5   3    0.54    0.11
   6  -5   3    0.58    0.14
  -7   5  -3    0.84    0.13
  -7   5  -3    1.22    0.17
  -7   5  -3    0.62    0.13
  -7   5  -3    0.86    0.13
   7  -5   3    1.18    0.17
   7  -5   3    1.05    0.16
  -8   5  -3    1.64    0.24
  -8   5  -3    2.52    0.30
  -8   5  -3    2.05    0.22
  -8   5  -3    2.88    0.30
   8  -5   3    2.37    0.27
   8  -5   3    2.19    0.24
   8  -5   3    2.27    0.30
   8  -5   3    1.71    0.29
  -9   5  -3   -0.18    0.16
  -9   5  -3    0.17    0.09
  -9   5  -3    0.12    0.10
   9  -5   3    0.06    0.21
   9  -5   3    0.08    0.17
   9  -5   3    0.03    0.10
   9  -5   3   -0.20    0.22
 -10   5  -3    0.74    0.15
 -10   5  -3    0.51    0.12
  10  -5   3    0.55    0.14
 -11   5  -3    0.91    0.15
 -11   5  -3    1.12    0.23
 -11   5  -3    0.57    0.15
  11  -5   3    0.73    0.16
 -12   5  -3    0.26    0.25
 -12   5  -3    0.12    0.12
  12  -5   3    0.27    0.13
 -13   5  -3    1.69    0.40
  13  -5   3    2.51    0.30
  14   4  -3    0.81    0.18
 -14  -4   3    0.91    0.17
  13   4  -3    2.93    0.34
 -13  -4   3    2.70    0.34
  12   4  -3    5.54    0.56
  12   4  -3    5.66    0.56
 -12  -4   3    5.82    0.57
  11   4  -3    1.92    0.27
  11   4  -3    1.98    0.27
 -11  -4   3    1.56    0.24
 -11  -4   3    2.12    0.27
  10   4  -3    0.17    0.12
  10   4  -3    0.17    0.13
 -10  -4   3    0.30    0.13
 -10  -4   3    0.01    0.12
   9   4  -3    0.72    0.14
   9   4  -3    0.68    0.14
   9   4  -3    1.14    0.20
   9   4  -3    0.38    0.13
  -9  -4   3    0.56    0.14
  -9  -4   3    0.79    0.14
   8   4  -3    0.12    0.11
   8   4  -3    0.13    0.08
   8   4  -3    0.02    0.17
   8   4  -3    0.17    0.09
   8   4  -3    0.03    0.09
  -8  -4   3    0.19    0.09
  -8  -4   3   -0.01    0.10
  -8  -4   3    0.42    0.19
  -8  -4   3    0.06    0.09
   7   4  -3    0.38    0.10
   7   4  -3    0.45    0.10
   7   4  -3    0.22    0.08
   7   4  -3    0.36    0.09
  -7  -4   3    0.44    0.12
  -7  -4   3    0.27    0.15
  -7  -4   3    0.30    0.09
  -7  -4   3    0.23    0.07
   6   4  -3    0.36    0.09
   6   4  -3    0.35    0.08
   6   4  -3    0.24    0.09
   6   4  -3    0.38    0.07
  -6  -4   3    0.35    0.08
  -6  -4   3    0.32    0.07
  -6  -4   3    0.64    0.14
  -6  -4   3    0.26    0.08
  -6  -4   3    0.35    0.12
   5   4  -3    3.67    0.32
  -5  -4   3    3.66    0.31
  -5  -4   3    3.05    0.38
  -5  -4   3    3.32    0.33
   4   4  -3    1.50    0.15
   4   4  -3    1.35    0.15
  -4  -4   3    1.46    0.16
  -4  -4   3    1.70    0.15
  -4  -4   3    1.49    0.17
   3   4  -3    8.44    0.72
   3   4  -3    8.05    0.74
   2   4  -3    4.07    0.34
  -2  -4   3    4.01    0.34
   0   4  -3    9.35    0.77
   0  -4   3    9.45    0.77
  -1   4  -3    1.32    0.13
  -1   4  -3    1.44    0.14
  -2   4  -3    0.35    0.05
  -2   4  -3    0.35    0.05
  -2   4  -3    0.26    0.05
   2  -4   3    0.51    0.07
   2  -4   3    0.45    0.05
   2  -4   3    0.43    0.05
   2  -4   3    0.30    0.08
  -3   4  -3    3.70    0.29
  -3   4  -3    3.48    0.32
   3  -4   3    3.21    0.29
  -4   4  -3   40.41    3.39
   4  -4   3   42.78    3.39
   4  -4   3   41.88    3.66
  -5   4  -3    0.00    0.10
  -5   4  -3    0.04    0.05
  -5   4  -3    0.10    0.08
  -5   4  -3   -0.05    0.05
   5  -4   3    0.03    0.06
   5  -4   3    0.00    0.05
   5  -4   3    0.07    0.07
   5  -4   3   -0.01    0.09
  -6   4  -3    2.86    0.26
  -6   4  -3    2.50    0.28
  -6   4  -3    2.54    0.33
  -6   4  -3    3.12    0.27
  -6   4  -3    3.34    0.31
   6  -4   3    2.44    0.30
   6  -4   3    2.71    0.29
  -7   4  -3    0.09    0.11
  -7   4  -3    0.18    0.06
  -7   4  -3    0.20    0.09
  -7   4  -3    0.07    0.08
   7  -4   3   -0.03    0.10
   7  -4   3    0.31    0.11
   7  -4   3    0.20    0.08
   7  -4   3    0.05    0.12
   7  -4   3    0.01    0.09
  -8   4  -3    0.81    0.14
  -8   4  -3    1.13    0.14
  -8   4  -3    1.00    0.18
  -8   4  -3    0.87    0.18
   8  -4   3    1.31    0.18
   8  -4   3    1.17    0.20
   8  -4   3    1.00    0.15
   8  -4   3    0.89    0.17
  -9   4  -3    0.06    0.13
  -9   4  -3    0.15    0.11
  -9   4  -3    0.07    0.08
   9  -4   3    0.04    0.15
   9  -4   3   -0.06    0.19
   9  -4   3    0.11    0.11
 -10   4  -3    0.08    0.15
 -10   4  -3    0.19    0.12
  10  -4   3   -0.02    0.19
 -11   4  -3   -0.02    0.16
 -11   4  -3   -0.08    0.13
 -11   4  -3   -0.15    0.11
  11  -4   3    0.00    0.11
 -12   4  -3   -0.19    0.20
 -12   4  -3   -0.31    0.22
 -12   4  -3    0.10    0.13
  12  -4   3   -0.02    0.13
 -13   4  -3    0.02    0.24
  13  -4   3    0.11    0.12
  14   3  -3    0.18    0.15
 -14  -3   3    0.29    0.15
 -14  -3   3    0.38    0.21
  13   3  -3    0.04    0.13
 -13  -3   3    0.21    0.14
 -13  -3   3    0.25    0.15
  12   3  -3    1.88    0.27
  12   3  -3    1.83    0.26
 -12  -3   3    1.97    0.28
 -12  -3   3    1.98    0.27
  11   3  -3    3.62    0.43
  11   3  -3    4.97    0.44
 -11  -3   3    3.84    0.43
  10   3  -3    0.64    0.14
  10   3  -3    0.49    0.14
  10   3  -3    0.35    0.30
 -10  -3   3    0.73    0.15
 -10  -3   3    0.38    0.16
 -10  -3   3    0.73    0.14
   9   3  -3    0.84    0.16
   9   3  -3    1.09    0.15
   9   3  -3    1.09    0.16
   9   3  -3    0.46    0.18
  -9  -3   3    0.66    0.14
  -9  -3   3    0.81    0.13
   8   3  -3    2.55    0.27
   8   3  -3    2.42    0.27
   8   3  -3    3.24    0.32
   8   3  -3    3.06    0.28
  -8  -3   3    2.24    0.27
  -8  -3   3    2.64    0.27
  -8  -3   3    2.36    0.26
   7   3  -3    0.41    0.09
   7   3  -3    0.23    0.08
   7   3  -3    0.42    0.09
   7   3  -3    0.21    0.08
   7   3  -3    0.31    0.09
  -7  -3   3    0.31    0.09
  -7  -3   3    0.48    0.10
  -7  -3   3    0.28    0.08
  -7  -3   3    0.28    0.07
   6   3  -3    5.37    0.44
   6   3  -3    5.05    0.46
  -6  -3   3    5.00    0.44
   5   3  -3    4.90    0.44
   5   3  -3    4.86    0.42
   4   3  -3    1.42    0.15
   4   3  -3    1.40    0.13
   4   3  -3    1.30    0.12
  -4  -3   3    1.26    0.12
  -4  -3   3    1.26    0.14
  -4  -3   3    1.09    0.15
  -4  -3   3    1.12    0.13
   2   3  -3    0.60    0.07
   2   3  -3    0.62    0.07
  -2  -3   3    0.80    0.07
   1   3  -3    1.84    0.16
   0  -3   3   26.06    2.12
  -1   3  -3    4.66    0.36
  -1   3  -3    4.01    0.42
   1  -3   3    4.54    0.37
  -3   3  -3    1.39    0.14
  -3   3  -3    1.32    0.13
  -3   3  -3    1.30    0.14
  -3   3  -3    1.35    0.13
   3  -3   3    1.35    0.13
  -4   3  -3    6.11    0.57
  -5   3  -3   24.64    1.95
  -5   3  -3   23.36    1.96
   5  -3   3   23.65    2.07
  -6   3  -3   -0.03    0.18
  -7   3  -3    1.66    0.20
  -7   3  -3    1.43    0.17
  -7   3  -3    1.33    0.20
   7  -3   3    2.05    0.21
   7  -3   3    1.88    0.20
   7  -3   3    2.02    0.23
  -8   3  -3    0.18    0.07
  -8   3  -3    0.34    0.11
  -8   3  -3    0.08    0.16
  -8   3  -3    0.16    0.11
   8  -3   3    0.14    0.11
   8  -3   3    0.26    0.08
   8  -3   3    0.33    0.17
  -9   3  -3    0.91    0.16
  -9   3  -3    0.44    0.12
  -9   3  -3    0.84    0.14
   9  -3   3    0.61    0.12
   9  -3   3    0.84    0.16
 -10   3  -3    0.79    0.14
 -10   3  -3    0.74    0.18
  10  -3   3    0.91    0.20
 -11   3  -3    0.27    0.18
 -11   3  -3    0.59    0.16
  11  -3   3    0.82    0.22
  11  -3   3    1.08    0.17
 -12   3  -3    0.19    0.13
 -12   3  -3    0.25    0.18
  12  -3   3    0.21    0.13
 -13   3  -3    3.17    0.44
  13  -3   3    3.55    0.37
  14   2  -3   -0.01    0.13
 -14  -2   3    0.19    0.16
 -14  -2   3    0.49    0.16
  13   2  -3    0.40    0.13
 -13  -2   3    0.61    0.15
 -13  -2   3    0.69    0.16
  12   2  -3    6.70    0.66
  12   2  -3    6.46    0.64
  11   2  -3    0.03    0.11
  11   2  -3    0.10    0.15
 -11  -2   3   -0.07    0.15
 -11  -2   3   -0.04    0.15
 -11  -2   3    0.09    0.13
  10   2  -3    1.69    0.25
  10   2  -3    2.32    0.26
 -10  -2   3    1.52    0.24
 -10  -2   3    2.13    0.24
 -10  -2   3    1.85    0.24
   9   2  -3    2.10    0.24
   9   2  -3    2.01    0.28
   9   2  -3    1.93    0.22
   9   2  -3    1.82    0.28
  -9  -2   3    1.47    0.22
  -9  -2   3    1.84    0.21
  -9  -2   3    2.21    0.26
  -9  -2   3    1.82    0.26
   8   2  -3   15.12    1.37
   8   2  -3   15.58    1.48
  -8  -2   3   14.80    1.40
  -8  -2   3   15.78    1.34
   7   2  -3    8.08    0.74
   7   2  -3    8.40    0.78
   7   2  -3    7.29    0.71
  -7  -2   3    7.61    0.68
  -7  -2   3    8.30    0.75
  -7  -2   3    8.41    0.71
   6   2  -3    2.51    0.26
   6   2  -3    2.42    0.24
   6   2  -3    2.80    0.26
   6   2  -3    2.60    0.25
  -6  -2   3    2.26    0.24
  -6  -2   3    1.96    0.27
  -6  -2   3    2.69    0.23
   5   2  -3    0.92    0.12
   5   2  -3    0.72    0.11
   5   2  -3    1.06    0.12
   5   2  -3    1.09    0.13
   5   2  -3    0.99    0.11
  -5  -2   3    0.87    0.10
  -5  -2   3    0.74    0.11
  -5  -2   3    1.12    0.14
   4   2  -3    7.41    0.70
   4   2  -3    7.68    0.71
   4   2  -3    7.80    0.64
   4   2  -3    8.07    0.64
   4   2  -3    8.26    0.68
  -4  -2   3    7.53    0.64
  -3  -2   3   11.12    0.91
   2   2  -3    0.05    0.03
   2   2  -3    0.09    0.03
  -2  -2   3    0.09    0.03
  -2  -2   3    0.08    0.04
  -1  -2   3   14.27    1.16
   0   2  -3    0.43    0.05
   0  -2   3    0.52    0.06
   0  -2   3    0.52    0.06
   1  -2   3  107.38    8.71
  -2   2  -3    0.57    0.07
   2  -2   3    0.60    0.08
   2  -2   3    0.66    0.07
  -3   2  -3   14.28    1.40
   3  -2   3   14.66    1.33
   3  -2   3   15.26    1.20
  -4   2  -3   18.52    1.57
  -4   2  -3   19.90    1.57
  -5   2  -3   43.98    3.58
  -6   2  -3   15.42    1.35
   6  -2   3   14.27    1.32
  -7   2  -3    3.21    0.32
  -7   2  -3    3.48    0.33
  -7   2  -3    3.55    0.34
   7  -2   3    3.28    0.33
   7  -2   3    2.95    0.33
  -8   2  -3    0.27    0.18
  -8   2  -3    0.40    0.11
  -8   2  -3    0.36    0.09
  -8   2  -3    0.30    0.12
   8  -2   3    0.44    0.11
   8  -2   3    0.50    0.11
  -9   2  -3    1.86    0.21
  -9   2  -3    1.51    0.22
   9  -2   3    1.71    0.24
   9  -2   3    1.77    0.24
  10  -2   3   -0.18    0.14
 -11   2  -3    2.55    0.33
 -11   2  -3    2.96    0.36
  11  -2   3    3.06    0.38
  11  -2   3    3.50    0.36
 -12   2  -3    0.31    0.16
  12  -2   3    0.62    0.15
  12  -2   3   -0.04    0.24
  13  -2   3    3.17    0.35
 -14  -1   3    1.02    0.19
 -14  -1   3    1.63    0.24
  13   1  -3    0.23    0.12
 -13  -1   3    0.01    0.13
 -13  -1   3    0.37    0.18
  12   1  -3    1.18    0.20
  12   1  -3    1.25    0.26
 -12  -1   3    1.29    0.21
  11   1  -3    0.76    0.16
 -11  -1   3    0.72    0.16
  10   1  -3   14.91    1.41
  10   1  -3   14.09    1.34
 -10  -1   3   15.39    1.36
   9   1  -3    6.89    0.65
   9   1  -3    7.39    0.65
  -9  -1   3    6.41    0.66
   8   1  -3    1.10    0.17
   8   1  -3    1.52    0.19
   8   1  -3    1.20    0.15
  -8  -1   3    1.31    0.18
  -8  -1   3    1.45    0.19
   7   1  -3    0.59    0.15
   7   1  -3    0.58    0.12
   7   1  -3    0.80    0.11
   7   1  -3    0.76    0.14
   7   1  -3    0.82    0.12
  -7  -1   3    0.56    0.13
  -7  -1   3    0.74    0.09
  -7  -1   3    0.63    0.17
  -7  -1   3    0.52    0.10
   6   1  -3   12.03    1.08
   6   1  -3   12.23    1.19
  -6  -1   3   13.14    1.04
   5   1  -3   12.87    1.09
   5   1  -3   13.04    1.18
  -5  -1   3   13.93    1.09
   4   1  -3    0.11    0.05
   4   1  -3    0.20    0.03
   4   1  -3    0.11    0.05
  -4  -1   3    0.17    0.04
  -4  -1   3    0.19    0.05
  -4  -1   3    0.15    0.03
  -4  -1   3    0.18    0.06
   3   1  -3    1.24    0.12
  -3  -1   3    1.41    0.12
   2   1  -3    0.77    0.07
  -2  -1   3    0.67    0.07
  -2  -1   3    0.75    0.07
   1   1  -3   16.48    1.34
  -1   1  -3  309.65   25.14
  -2   1  -3    0.74    0.08
  -2   1  -3    0.78    0.08
  -3   1  -3    4.41    0.38
   3  -1   3    4.51    0.43
   3  -1   3    4.55    0.41
   3  -1   3    4.66    0.38
  -4   1  -3   10.18    0.87
  -4   1  -3    9.53    0.91
   4  -1   3    9.72    0.87
   4  -1   3   10.65    0.83
  -5   1  -3    3.12    0.31
  -5   1  -3    3.51    0.32
  -5   1  -3    3.28    0.28
   5  -1   3    3.57    0.29
   5  -1   3    3.22    0.32
   5  -1   3    3.02    0.32
   5  -1   3    2.92    0.31
  -6   1  -3    0.11    0.07
  -6   1  -3    0.09    0.06
  -6   1  -3    0.07    0.06
  -6   1  -3   -0.04    0.08
   6  -1   3    0.11    0.07
   6  -1   3    0.09    0.05
   6  -1   3    0.15    0.08
   6  -1   3    0.18    0.07
   6  -1   3    0.05    0.07
  -7   1  -3   -0.02    0.07
  -7   1  -3    0.14    0.06
  -7   1  -3    0.10    0.10
  -7   1  -3    0.16    0.10
   7  -1   3    0.11    0.08
   7  -1   3    0.17    0.09
   7  -1   3    0.07    0.11
   7  -1   3    0.21    0.08
   7  -1   3    0.12    0.08
  -8   1  -3    0.23    0.16
  -8   1  -3    0.02    0.08
  -8   1  -3    0.10    0.10
  -8   1  -3   -0.03    0.09
   8  -1   3    0.30    0.20
   8  -1   3    0.02    0.11
   8  -1   3   -0.03    0.08
   8  -1   3    0.08    0.10
  -9   1  -3    1.77    0.25
  -9   1  -3    1.78    0.23
   9  -1   3    1.74    0.24
   9  -1   3    2.21    0.26
 -11   1  -3   -0.10    0.12
 -11   1  -3   -0.02    0.12
  11  -1   3   -0.09    0.14
  11  -1   3   -0.06    0.14
 -12   1  -3    1.38    0.22
  12  -1   3    1.63    0.22
  12  -1   3    1.22    0.24
 -13   1  -3    0.18    0.18
  13  -1   3    0.19    0.13
 -14   0   3    0.46    0.25
  13   0  -3    0.17    0.12
 -13   0   3    0.30    0.20
 -13   0   3    0.42    0.14
  12   0  -3    0.18    0.12
  12   0  -3   -0.06    0.20
 -12   0   3    0.27    0.14
 -12   0   3    0.50    0.19
 -12   0   3    0.15    0.14
  11   0  -3    5.32    0.51
 -11   0   3    4.88    0.51
  10   0  -3    0.40    0.21
   8   0  -3    0.46    0.10
   8   0  -3    0.61    0.13
   8   0  -3    0.47    0.15
   8   0  -3    0.44    0.11
  -8   0   3    0.56    0.09
  -8   0   3    0.66    0.11
  -8   0   3    0.70    0.14
  -8   0   3    0.79    0.11
   7   0  -3    0.85    0.12
   7   0  -3    0.95    0.13
   7   0  -3    0.91    0.14
   7   0  -3    0.98    0.13
   7   0  -3    0.61    0.11
  -7   0   3    0.70    0.10
  -7   0   3    0.93    0.20
  -7   0   3    0.70    0.11
  -7   0   3    0.98    0.15
   6   0  -3   42.81    4.03
   6   0  -3   46.24    3.89
  -6   0   3   44.40    3.61
  -6   0   3   43.45    3.60
   5   0  -3    0.19    0.05
   5   0  -3    0.04    0.05
   5   0  -3    0.08    0.08
   5   0  -3    0.07    0.05
   5   0  -3    0.21    0.04
   5   0  -3    0.07    0.08
  -5   0   3    0.08    0.04
  -5   0   3    0.07    0.05
  -5   0   3    0.16    0.06
  -5   0   3    0.07    0.06
   4   0  -3    6.82    0.57
  -4   0   3    6.81    0.60
  -4   0   3    6.75    0.57
  -4   0   3    7.06    0.57
   3   0  -3    0.07    0.03
   3   0  -3    0.03    0.03
   3   0  -3    0.10    0.02
  -3   0   3    0.09    0.03
  -3   0   3    0.08    0.03
   2   0  -3   19.00    1.55
   1   0  -3    0.89    0.08
   1   0  -3    0.95    0.10
  -1   0   3    0.96    0.08
  -1   0   3    0.80    0.08
   0   0  -3    3.31    0.33
   0   0  -3    3.71    0.28
   0   0   3    3.22    0.28
  -1   0  -3   64.79    5.53
  -1   0  -3   70.67    5.53
   1   0   3   68.85    5.53
  -2   0  -3   70.41    5.55
   2   0   3   66.18    5.55
  -3   0  -3    0.48    0.09
  -3   0  -3    0.45    0.07
   3   0   3    0.58    0.06
   3   0   3    0.71    0.08
   3   0   3    0.61    0.08
   3   0   3    0.65    0.07
  -4   0  -3    5.41    0.44
   4   0   3    4.66    0.41
   4   0   3    5.27    0.47
   4   0   3    4.53    0.46
   4   0   3    4.56    0.42
  -5   0  -3   13.17    1.25
  -5   0  -3   13.18    1.06
  -5   0  -3   12.27    1.17
  -6   0  -3    0.37    0.13
  -6   0  -3    0.01    0.07
  -6   0  -3    0.33    0.08
  -6   0  -3    0.16    0.08
  -6   0  -3    0.06    0.08
   6   0   3    0.21    0.08
   6   0   3    0.12    0.06
   6   0   3    0.09    0.08
   6   0   3    0.17    0.07
  -7   0  -3   -0.01    0.08
  -7   0  -3   -0.13    0.11
  -7   0  -3    0.14    0.09
  -7   0  -3    0.24    0.09
   7   0   3    0.19    0.11
   7   0   3    0.09    0.08
   7   0   3    0.13    0.08
   7   0   3    0.12    0.08
   7   0   3    0.01    0.07
  -8   0  -3    3.26    0.32
  -8   0  -3    2.88    0.31
   8   0   3    2.65    0.37
  -9   0  -3   -0.04    0.11
  -9   0  -3   -0.26    0.09
   9   0   3    0.00    0.12
   9   0   3    0.09    0.12
   9   0   3   -0.01    0.13
 -10   0  -3    0.01    0.13
 -10   0  -3    0.33    0.13
 -11   0  -3    0.40    0.16
  11   0   3    0.89    0.17
  11   0   3    0.79    0.18
 -12   0  -3    0.04    0.16
 -12   0  -3    0.12    0.15
  12   0   3   -0.02    0.18
  12   0   3    0.32    0.15
 -13   0  -3    1.26    0.25
  13   0   3    0.76    0.29
 -14   1   3    0.79    0.33
  13  -1  -3   -0.60    0.23
  13  -1  -3    0.09    0.12
 -13   1   3   -0.04    0.13
 -13   1   3    0.54    0.25
 -13   1   3   -0.19    0.15
  12  -1  -3   -0.07    0.16
  12  -1  -3    0.22    0.12
 -12   1   3    0.40    0.13
 -12   1   3    0.22    0.11
 -12   1   3    0.38    0.21
  11  -1  -3    3.59    0.40
 -11   1   3    4.16    0.38
 -11   1   3    3.47    0.46
  10  -1  -3    0.32    0.21
  10  -1  -3    0.01    0.12
 -10   1   3    0.25    0.17
   9  -1  -3    0.09    0.09
   9  -1  -3    0.00    0.14
   9  -1  -3    0.15    0.12
   9  -1  -3    0.12    0.10
   9  -1  -3    0.02    0.15
  -9   1   3    0.13    0.13
  -9   1   3    0.30    0.08
  -9   1   3    0.05    0.15
  -9   1   3    0.12    0.09
   8  -1  -3    1.71    0.22
   8  -1  -3    1.68    0.19
   8  -1  -3    1.08    0.17
   8  -1  -3    1.47    0.19
  -8   1   3    1.53    0.16
  -8   1   3    1.09    0.17
  -8   1   3    1.38    0.17
   7  -1  -3    0.07    0.07
   7  -1  -3    0.14    0.09
   7  -1  -3   -0.02    0.05
   7  -1  -3   -0.03    0.09
   7  -1  -3   -0.02    0.07
  -7   1   3    0.13    0.14
  -7   1   3    0.06    0.07
  -7   1   3    0.01    0.05
  -7   1   3   -0.01    0.05
  -7   1   3   -0.03    0.11
   6  -1  -3    0.91    0.12
   6  -1  -3    0.98    0.13
   6  -1  -3    1.08    0.14
   6  -1  -3    0.82    0.13
  -6   1   3    0.89    0.11
  -6   1   3    1.14    0.14
  -6   1   3    1.06    0.16
  -6   1   3    0.77    0.12
   5  -1  -3    0.80    0.12
   5  -1  -3    0.67    0.10
  -5   1   3    0.75    0.10
  -5   1   3    0.78    0.08
  -5   1   3    0.73    0.10
  -5   1   3    0.91    0.12
   4  -1  -3   15.25    1.37
   3  -1  -3    0.44    0.05
   3  -1  -3    0.50    0.07
   3  -1  -3    0.44    0.05
  -3   1   3    0.38    0.05
  -3   1   3    0.34    0.05
   2  -1  -3   13.81    1.15
  -2   1   3   14.62    1.15
  -2   1   3   13.96    1.15
  -1   1   3   48.69    3.95
  -1   1   3   48.56    3.95
   0  -1  -3   17.80    1.36
   0  -1  -3   16.82    1.36
   0  -1  -3   16.12    1.59
   0   1   3   16.35    1.37
   0   1   3   16.41    1.59
   0   1   3   17.15    1.37
   1   1   3  105.50    8.56
  -2  -1  -3   73.45    5.96
  -3  -1  -3   13.22    1.06
   3   1   3   12.39    1.06
   3   1   3   13.03    1.22
  -4  -1  -3    0.45    0.09
  -4  -1  -3    0.26    0.05
  -4  -1  -3    0.55    0.09
  -4  -1  -3    0.48    0.06
  -4  -1  -3    0.40    0.10
   4   1   3    0.41    0.07
   4   1   3    0.35    0.06
   4   1   3    0.37    0.05
   4   1   3    0.34    0.08
   4   1   3    0.29    0.10
  -5  -1  -3    1.01    0.13
  -5  -1  -3    0.86    0.11
  -5  -1  -3    1.04    0.14
  -5  -1  -3    1.05    0.15
  -5  -1  -3    1.26    0.14
   5   1   3    1.22    0.16
   5   1   3    0.89    0.12
   5   1   3    1.16    0.14
   5   1   3    0.79    0.11
   5   1   3    1.04    0.12
  -6  -1  -3    6.83    0.64
  -6  -1  -3    7.72    0.74
   6   1   3    7.24    0.66
  -7  -1  -3   -0.03    0.08
  -7  -1  -3    0.09    0.08
  -7  -1  -3   -0.06    0.13
   7   1   3    0.16    0.10
   7   1   3   -0.08    0.07
   7   1   3    0.16    0.08
   7   1   3   -0.07    0.09
  -8  -1  -3    1.96    0.25
  -8  -1  -3    2.14    0.25
   8   1   3    2.59    0.30
   8   1   3    2.19    0.25
   8   1   3    2.50    0.28
  -9  -1  -3    0.24    0.12
  -9  -1  -3    0.15    0.12
   9   1   3    0.33    0.12
   9   1   3    0.23    0.11
   9   1   3    0.28    0.12
 -10  -1  -3    0.44    0.13
  10   1   3    0.39    0.16
  10   1   3    0.56    0.15
 -11  -1  -3   -0.17    0.13
 -11  -1  -3    0.17    0.16
  11   1   3    0.04    0.16
  11   1   3    0.10    0.13
 -12  -1  -3   -0.16    0.13
 -12  -1  -3   -0.03    0.20
  12   1   3    0.06    0.16
  12   1   3    0.01    0.15
 -13  -1  -3   -0.07    0.15
  13   1   3   -0.50    0.23
  13   1   3    0.43    0.16
  14  -2  -3   -0.05    0.13
  13  -2  -3    0.17    0.20
  13  -2  -3    0.44    0.12
 -13   2   3    0.41    0.14
 -13   2   3    0.18    0.13
  12  -2  -3    0.08    0.11
  12  -2  -3   -0.07    0.15
 -12   2   3    0.09    0.12
 -12   2   3    0.36    0.25
 -12   2   3    0.19    0.12
  11  -2  -3    8.73    0.82
  10  -2  -3    0.94    0.22
  10  -2  -3    1.26    0.24
  10  -2  -3    1.14    0.18
  10  -2  -3    0.96    0.15
 -10   2   3    0.73    0.15
 -10   2   3    1.17    0.26
 -10   2   3    1.19    0.15
   9  -2  -3    0.27    0.09
   9  -2  -3    0.20    0.09
   9  -2  -3   -0.04    0.12
   9  -2  -3    0.19    0.12
  -9   2   3    0.21    0.08
  -9   2   3    0.37    0.18
  -9   2   3    0.20    0.09
  -9   2   3    0.20    0.13
   8  -2  -3    0.32    0.11
   8  -2  -3    0.72    0.12
   8  -2  -3    0.57    0.10
   8  -2  -3    0.54    0.09
  -8   2   3    0.75    0.11
  -8   2   3    0.54    0.09
  -8   2   3    0.54    0.09
   7  -2  -3    0.82    0.13
   7  -2  -3    0.63    0.12
   7  -2  -3    0.72    0.11
  -7   2   3    0.90    0.11
  -7   2   3    1.03    0.11
  -7   2   3    0.97    0.19
   6  -2  -3   22.28    2.03
   6  -2  -3   22.39    2.01
   5  -2  -3    0.04    0.07
   5  -2  -3    0.04    0.05
   5  -2  -3    0.01    0.04
   5  -2  -3   -0.01    0.05
   5  -2  -3    0.02    0.05
  -5   2   3   -0.03    0.05
  -5   2   3    0.02    0.05
  -5   2   3    0.06    0.03
  -5   2   3    0.02    0.06
   4  -2  -3    3.24    0.34
   4  -2  -3    3.45    0.35
   4  -2  -3    3.50    0.30
   4  -2  -3    3.80    0.29
   4  -2  -3    3.53    0.33
   3  -2  -3    1.10    0.09
   3  -2  -3    1.06    0.10
  -3   2   3    1.09    0.10
  -3   2   3    1.01    0.10
   2  -2  -3   45.80    4.36
   2  -2  -3   46.94    3.73
  -2   2   3   46.24    3.73
  -2   2   3   45.00    3.73
   1  -2  -3    5.51    0.50
  -1   2   3    4.98    0.42
  -1   2   3    5.01    0.42
  -1   2   3    5.30    0.50
   0  -2  -3  133.30   12.83
   0  -2  -3  139.61   10.99
   0   2   3  134.48   10.99
   0   2   3  134.69   10.99
   0   2   3  134.94   12.83
  -1  -2  -3  145.71   11.36
  -1  -2  -3  131.82   11.36
   1   2   3  147.12   11.37
   1   2   3  135.25   11.37
   1   2   3  140.16   13.27
  -2  -2  -3   41.57    3.86
   2   2   3   39.82    3.29
   2   2   3   40.01    3.29
  -3  -2  -3   18.37    1.75
  -3  -2  -3   17.81    1.49
  -3  -2  -3   20.06    1.54
   3   2   3   18.07    1.58
   3   2   3   17.98    1.74
   3   2   3   17.84    1.50
  -4  -2  -3    5.54    0.52
  -4  -2  -3    5.67    0.59
  -4  -2  -3    6.33    0.55
  -4  -2  -3    6.26    0.50
   4   2   3    5.97    0.57
   4   2   3    5.74    0.54
   4   2   3    6.09    0.53
  -5  -2  -3    1.10    0.14
  -5  -2  -3    1.26    0.16
  -5  -2  -3    1.50    0.18
   5   2   3    1.35    0.16
   5   2   3    1.12    0.13
   5   2   3    1.14    0.17
   5   2   3    1.26    0.14
  -6  -2  -3    0.81    0.14
  -6  -2  -3    0.97    0.14
  -6  -2  -3    1.03    0.18
  -6  -2  -3    1.31    0.15
   6   2   3    1.11    0.13
   6   2   3    0.98    0.13
   6   2   3    0.76    0.12
   6   2   3    1.16    0.15
  -7  -2  -3    1.61    0.19
  -7  -2  -3    2.02    0.24
  -7  -2  -3    1.48    0.19
   7   2   3    1.27    0.18
   7   2   3    1.35    0.19
   7   2   3    1.40    0.17
   7   2   3    1.26    0.19
  -8  -2  -3    0.08    0.08
  -8  -2  -3    0.13    0.12
   8   2   3    0.02    0.12
   8   2   3   -0.10    0.08
   8   2   3    0.08    0.10
   8   2   3    0.14    0.22
  -9  -2  -3    1.75    0.23
   9   2   3    1.77    0.21
   9   2   3    1.32    0.23
   9   2   3    1.73    0.23
 -10  -2  -3   -0.06    0.11
 -10  -2  -3    0.07    0.16
  10   2   3    0.02    0.15
  10   2   3    0.05    0.15
  10   2   3    0.02    0.12
 -11  -2  -3    1.78    0.25
 -11  -2  -3    1.46    0.21
  11   2   3    1.20    0.20
 -12  -2  -3    0.47    0.14
  12   2   3    0.56    0.16
  12   2   3    0.26    0.16
 -13  -2  -3    1.03    0.17
  13   2   3    0.62    0.22
  13   2   3    0.94    0.20
  14  -3  -3   -0.05    0.13
  14  -3  -3   -0.56    0.26
 -14   3   3    0.04    0.13
 -14   3   3   -0.14    0.18
  13  -3  -3    1.93    0.25
  13  -3  -3    1.84    0.26
 -13   3   3    2.12    0.26
 -13   3   3    1.45    0.23
  12  -3  -3   -0.19    0.13
  12  -3  -3   -0.01    0.11
  11  -3  -3    0.43    0.12
  11  -3  -3    0.53    0.14
 -11   3   3    0.53    0.12
  10  -3  -3    0.03    0.21
  10  -3  -3    0.15    0.10
  10  -3  -3    0.04    0.10
  10  -3  -3    0.00    0.15
 -10   3   3    0.10    0.08
 -10   3   3    0.14    0.10
   9  -3  -3   28.09    2.52
   9  -3  -3   26.75    2.47
   8  -3  -3    0.10    0.10
   8  -3  -3    0.29    0.11
   8  -3  -3    0.30    0.08
   8  -3  -3    0.22    0.10
  -8   3   3    0.35    0.08
  -8   3   3    0.47    0.08
  -8   3   3    0.35    0.09
   7  -3  -3    0.68    0.13
   7  -3  -3    0.61    0.10
   7  -3  -3    0.72    0.10
  -7   3   3    0.76    0.11
  -7   3   3    0.71    0.10
  -7   3   3    0.66    0.08
   6  -3  -3    0.33    0.09
   6  -3  -3    0.28    0.07
   6  -3  -3    0.26    0.07
   6  -3  -3    0.38    0.08
  -6   3   3    0.24    0.05
  -6   3   3    0.43    0.09
  -6   3   3    0.36    0.06
  -6   3   3    0.45    0.09
   5  -3  -3   18.12    1.60
  -5   3   3   17.73    1.54
  -5   3   3   18.05    1.46
  -5   3   3   17.50    1.46
   4  -3  -3    1.07    0.13
   4  -3  -3    1.20    0.10
   4  -3  -3    1.18    0.10
   4  -3  -3    0.90    0.12
  -4   3   3    1.09    0.11
  -4   3   3    0.98    0.10
   3  -3  -3    1.73    0.20
   3  -3  -3    1.95    0.20
   3  -3  -3    2.04    0.20
  -3   3   3    1.92    0.16
  -3   3   3    1.98    0.16
  -2   3   3   32.71    2.66
  -1   3   3    3.52    0.34
   0   3   3    0.21    0.03
   0   3   3    0.25    0.04
   0   3   3    0.21    0.03
  -1  -3  -3  106.39    8.43
  -1  -3  -3  101.02    9.86
  -1  -3  -3  101.56    8.66
   1   3   3  106.41    8.43
   1   3   3  103.89    8.43
  -2  -3  -3    6.99    0.68
  -2  -3  -3    7.27    0.57
   2   3   3    6.91    0.66
   2   3   3    6.58    0.57
  -3  -3  -3    0.34    0.07
  -3  -3  -3    0.27    0.08
  -3  -3  -3    0.28    0.07
   3   3   3    0.36    0.05
   3   3   3    0.39    0.06
   3   3   3    0.36    0.06
   3   3   3    0.35    0.08
  -4  -3  -3    8.70    0.73
  -4  -3  -3    9.17    0.86
  -4  -3  -3    9.05    0.79
   4   3   3    8.46    0.84
   4   3   3    8.39    0.72
   4   3   3    8.96    0.77
  -5  -3  -3    9.83    0.83
  -5  -3  -3   10.67    0.97
  -5  -3  -3    9.89    0.85
   5   3   3    9.67    0.95
   5   3   3   10.50    0.83
   5   3   3    9.53    0.87
   5   3   3    9.74    0.89
  -6  -3  -3    3.44    0.36
  -6  -3  -3    3.61    0.40
   6   3   3    3.81    0.34
  -7  -3  -3    2.33    0.34
  -7  -3  -3    2.65    0.29
  -7  -3  -3    3.04    0.32
   7   3   3    2.81    0.27
   7   3   3    3.05    0.30
   7   3   3    2.77    0.32
   7   3   3    2.88    0.31
  -8  -3  -3    0.05    0.09
   8   3   3    0.04    0.10
   8   3   3    0.07    0.09
   8   3   3    0.06    0.13
  -9  -3  -3    0.61    0.15
  -9  -3  -3    0.53    0.18
   9   3   3    0.73    0.19
   9   3   3    0.61    0.15
   9   3   3    0.74    0.13
 -10  -3  -3    0.69    0.21
 -10  -3  -3    0.22    0.13
  10   3   3    0.30    0.15
  10   3   3    0.41    0.14
  10   3   3    0.71    0.18
 -11  -3  -3    4.45    0.53
 -11  -3  -3    4.14    0.46
  11   3   3    5.24    0.50
  11   3   3    4.33    0.45
 -12  -3  -3    0.18    0.13
 -12  -3  -3    0.73    0.30
  12   3   3    0.19    0.15
  12   3   3    0.28    0.18
 -13  -3  -3   -0.08    0.12
  13   3   3    0.09    0.18
  13   3   3    0.16    0.20
  14  -4  -3    0.07    0.20
  14  -4  -3    0.15    0.20
 -14   4   3    0.27    0.15
 -14   4   3    0.14    0.14
  13  -4  -3    0.46    0.17
  13  -4  -3    0.65    0.14
 -13   4   3    0.66    0.15
 -13   4   3    0.55    0.13
  12  -4  -3    0.06    0.11
  12  -4  -3   -0.12    0.14
  11  -4  -3    0.44    0.14
  11  -4  -3    0.52    0.13
  11  -4  -3    0.88    0.19
 -11   4   3    0.22    0.11
 -11   4   3    0.39    0.13
  10  -4  -3   -0.14    0.13
  10  -4  -3    0.03    0.22
  10  -4  -3    0.12    0.11
  10  -4  -3   -0.07    0.11
  10  -4  -3   -0.19    0.10
 -10   4   3   -0.09    0.08
 -10   4   3    0.10    0.11
   9  -4  -3    0.09    0.11
   9  -4  -3    0.07    0.10
   9  -4  -3    0.10    0.09
   9  -4  -3    0.14    0.14
   9  -4  -3   -0.04    0.11
  -9   4   3    0.12    0.09
  -9   4   3    0.09    0.07
   8  -4  -3    3.36    0.33
   8  -4  -3    3.29    0.34
   8  -4  -3    3.16    0.33
   8  -4  -3    3.22    0.31
  -8   4   3    2.72    0.28
  -8   4   3    2.66    0.31
  -8   4   3    3.08    0.29
   7  -4  -3    1.20    0.17
   7  -4  -3    1.53    0.16
   7  -4  -3    1.40    0.18
   7  -4  -3    1.28    0.19
  -7   4   3    1.19    0.15
  -7   4   3    1.36    0.14
  -7   4   3    1.72    0.17
   6  -4  -3    3.47    0.31
   6  -4  -3    2.63    0.31
   6  -4  -3    2.94    0.29
  -6   4   3    2.74    0.29
  -6   4   3    2.87    0.26
  -6   4   3    3.25    0.28
   5  -4  -3  120.24   11.76
   5  -4  -3  127.61   11.16
   4  -4  -3    2.88    0.29
   4  -4  -3    3.25    0.34
  -4   4   3    3.24    0.26
  -4   4   3    3.04    0.26
   3  -4  -3   13.22    1.20
   3  -4  -3   12.36    1.24
   3  -4  -3   12.68    1.17
   3  -4  -3   12.56    1.20
  -3   4   3   13.05    1.04
   2  -4  -3    4.00    0.38
   2  -4  -3    3.58    0.37
   2  -4  -3    4.04    0.37
   2  -4  -3    3.52    0.39
  -2   4   3    3.93    0.32
  -2   4   3    3.94    0.32
   1  -4  -3    0.35    0.08
   1  -4  -3    0.27    0.07
   1  -4  -3    0.28    0.09
   1  -4  -3    0.27    0.09
   1  -4  -3    0.33    0.06
  -1   4   3    0.29    0.03
  -1   4   3    0.29    0.03
   0  -4  -3   11.34    1.12
   0  -4  -3   12.03    1.12
   0  -4  -3   10.83    0.98
   0   4   3   11.92    0.94
  -1  -4  -3    1.13    0.15
   1   4   3    1.07    0.10
   1   4   3    0.88    0.12
   1   4   3    0.97    0.09
  -2  -4  -3    7.62    0.72
  -2  -4  -3    7.58    0.67
  -2  -4  -3    7.69    0.63
  -2  -4  -3    7.10    0.60
   2   4   3    6.92    0.70
   2   4   3    7.64    0.60
   2   4   3    7.00    0.60
  -3  -4  -3    3.95    0.35
  -3  -4  -3    3.96    0.40
  -3  -4  -3    3.72    0.33
   3   4   3    3.82    0.38
   3   4   3    3.53    0.36
   3   4   3    3.78    0.35
   3   4   3    4.21    0.33
   3   4   3    3.77    0.33
  -4  -4  -3   24.78    2.16
  -4  -4  -3   25.88    2.46
  -4  -4  -3   26.05    2.45
   4   4   3   24.89    2.10
   4   4   3   25.75    2.21
   4   4   3   26.44    2.26
   5   4   3    6.00    0.54
   5   4   3    5.76    0.52
   5   4   3    5.87    0.50
  -6  -4  -3   11.31    1.17
  -6  -4  -3   12.53    1.09
  -6  -4  -3   12.68    1.10
  -6  -4  -3   11.57    1.03
   6   4   3   11.57    1.12
   6   4   3   11.84    1.00
   6   4   3   13.00    1.08
   6   4   3   11.51    1.05
  -7  -4  -3    8.27    0.78
  -7  -4  -3    7.56    0.67
   7   4   3    7.01    0.67
   7   4   3    7.49    0.73
  -8  -4  -3    0.56    0.12
  -8  -4  -3    0.25    0.21
   8   4   3    0.46    0.11
   8   4   3    0.59    0.12
   8   4   3    0.67    0.19
  -9  -4  -3    4.72    0.53
   9   4   3    5.58    0.51
   9   4   3    6.03    0.53
 -10  -4  -3    0.10    0.16
 -10  -4  -3   -0.01    0.11
  10   4   3    0.11    0.18
  10   4   3   -0.06    0.13
  10   4   3   -0.08    0.11
 -11  -4  -3   -0.02    0.12
 -11  -4  -3    0.07    0.19
  11   4   3    0.00    0.13
  11   4   3    0.23    0.21
  11   4   3   -0.01    0.19
 -12  -4  -3    0.28    0.12
  12   4   3    0.16    0.21
  14  -5  -3    0.08    0.23
  14  -5  -3   -0.28    0.18
 -14   5   3   -0.14    0.13
 -14   5   3    0.01    0.14
  13  -5  -3    1.27    0.22
  13  -5  -3    1.65    0.27
 -13   5   3    1.56    0.21
 -13   5   3    1.45    0.21
  12  -5  -3    0.20    0.12
  12  -5  -3   -0.02    0.13
  12  -5  -3   -0.32    0.23
  11  -5  -3    0.28    0.16
  11  -5  -3   -0.06    0.12
  11  -5  -3    0.15    0.11
 -11   5   3   -0.08    0.09
 -11   5   3    0.03    0.12
  10  -5  -3    5.27    0.58
  10  -5  -3    6.34    0.55
 -10   5   3    5.55    0.53
   9  -5  -3    3.14    0.36
   9  -5  -3    3.33    0.34
   9  -5  -3    3.68    0.37
   9  -5  -3    3.96    0.41
  -9   5   3    2.85    0.34
   8  -5  -3    3.59    0.36
   8  -5  -3    3.52    0.34
  -8   5   3    3.53    0.33
  -8   5   3    3.28    0.35
   7  -5  -3    2.99    0.32
   7  -5  -3    3.40    0.32
   7  -5  -3    3.00    0.30
  -7   5   3    2.57    0.30
  -7   5   3    3.14    0.27
   6  -5  -3   12.72    1.14
   6  -5  -3   11.89    1.15
   6  -5  -3   11.63    1.17
   6  -5  -3   12.07    1.09
   5  -5  -3    2.88    0.28
   5  -5  -3    3.32    0.30
   5  -5  -3    2.52    0.33
   5  -5  -3    2.86    0.29
  -5   5   3    3.16    0.26
  -5   5   3    2.42    0.29
   4  -5  -3    0.86    0.13
   4  -5  -3    0.82    0.12
   4  -5  -3    1.30    0.17
   4  -5  -3    1.18    0.18
   4  -5  -3    0.94    0.12
  -4   5   3    0.94    0.10
  -4   5   3    0.98    0.09
   3  -5  -3    1.05    0.16
   3  -5  -3    1.13    0.16
   3  -5  -3    1.21    0.17
   3  -5  -3    1.17    0.16
   3  -5  -3    1.03    0.14
  -3   5   3    1.09    0.10
  -3   5   3    1.15    0.10
   2  -5  -3    0.23    0.07
   2  -5  -3    0.09    0.09
   2  -5  -3    0.11    0.05
   2  -5  -3    0.27    0.07
   2  -5  -3    0.15    0.07
   2  -5  -3    0.28    0.07
   2  -5  -3    0.15    0.09
   2  -5  -3    0.17    0.07
   2  -5  -3    0.27    0.08
   1  -5  -3   11.29    0.98
   1  -5  -3   11.27    1.09
   1  -5  -3   11.61    1.05
   1  -5  -3   11.89    1.12
   0  -5  -3    0.13    0.08
   0  -5  -3    0.06    0.08
   0  -5  -3    0.16    0.08
   0  -5  -3    0.07    0.06
   0  -5  -3    0.04    0.04
   0  -5  -3    0.12    0.07
   0  -5  -3    0.20    0.08
   0   5   3    0.09    0.02
   0   5   3    0.08    0.02
  -1  -5  -3    0.75    0.12
  -1  -5  -3    0.59    0.11
   1   5   3    0.72    0.08
   1   5   3    0.53    0.12
   1   5   3    0.67    0.07
  -2  -5  -3    4.76    0.41
  -2  -5  -3    5.19    0.46
  -2  -5  -3    5.15    0.44
  -2  -5  -3    4.86    0.41
   2   5   3    5.20    0.44
   2   5   3    5.02    0.42
   2   5   3    4.95    0.41
   2   5   3    4.85    0.46
   2   5   3    4.47    0.50
  -3  -5  -3    3.66    0.37
  -3  -5  -3    3.84    0.33
   3   5   3    3.86    0.33
   3   5   3    3.24    0.31
   3   5   3    4.02    0.32
   3   5   3    3.40    0.34
  -4  -5  -3   19.07    1.95
  -4  -5  -3   20.73    1.83
  -4  -5  -3   21.41    1.72
   4   5   3   20.22    1.80
   4   5   3   20.34    1.67
  -5  -5  -3    2.20    0.22
  -5  -5  -3    2.09    0.24
   5   5   3    2.06    0.20
   5   5   3    1.71    0.21
   5   5   3    1.63    0.19
  -6  -5  -3    1.90    0.26
  -6  -5  -3    1.89    0.20
  -6  -5  -3    1.72    0.22
   6   5   3    1.53    0.19
   6   5   3    1.56    0.19
   6   5   3    1.62    0.26
   6   5   3    1.73    0.21
  -7  -5  -3    1.70    0.21
  -7  -5  -3    1.55    0.26
  -7  -5  -3    1.79    0.21
   7   5   3    1.85    0.28
   7   5   3    1.63    0.21
   7   5   3    1.56    0.20
  -8  -5  -3    0.41    0.22
  -8  -5  -3    0.79    0.17
  -8  -5  -3    0.41    0.12
   8   5   3    0.49    0.11
   8   5   3    0.65    0.14
   8   5   3    0.73    0.22
  -9  -5  -3    0.02    0.11
  -9  -5  -3   -0.06    0.14
   9   5   3   -0.08    0.11
   9   5   3   -0.09    0.10
   9   5   3    0.20    0.21
 -10  -5  -3    2.51    0.29
  10   5   3    2.63    0.30
  10   5   3    2.07    0.30
 -11  -5  -3    1.43    0.20
 -11  -5  -3    1.24    0.24
  11   5   3    0.58    0.27
  11   5   3    0.88    0.24
 -12  -5  -3    0.48    0.13
  12   5   3    0.54    0.15
  12   5   3    0.38    0.30
  14  -6  -3    0.22    0.17
 -14   6   3    0.17    0.14
[truncated: 1,076,378 more chars]
