# Supplementary material for: A molecular shuttle that operates inside a metal–organic framework
Source: Springer Nature journal article supplement (doi:10.1038/nchem.2258), 2015-05-04
Supplement: 41557_2015_BFnchem2258_MOESM4_ESM.mol [file 41557_2015_BFnchem2258_MOESM4_ESM.mol]

  ChemDraw04161510102D

 39 43  0  0  0  0  0  0  0  0999 V2000
   -2.3636    2.8882    0.0000 C   0  0  0  0  0  0  0  0  0  0  0  0
   -2.3636    2.0632    0.0000 C   0  0  0  0  0  0  0  0  0  0  0  0
   -1.6491    1.6507    0.0000 C   0  0  0  0  0  0  0  0  0  0  0  0
   -0.9347    2.0632    0.0000 C   0  0  0  0  0  0  0  0  0  0  0  0
   -0.9347    2.8882    0.0000 C   0  0  0  0  0  0  0  0  0  0  0  0
   -1.6491    3.3007    0.0000 C   0  0  0  0  0  0  0  0  0  0  0  0
   -1.6491    0.8257    0.0000 C   0  0  0  0  0  0  0  0  0  0  0  0
   -2.3612    0.4146    0.0000 C   0  0  0  0  0  0  0  0  0  0  0  0
   -2.3636   -0.4118    0.0000 C   0  0  0  0  0  0  0  0  0  0  0  0
   -1.6491   -0.8243    0.0000 C   0  0  0  0  0  0  0  0  0  0  0  0
   -0.9347   -0.4118    0.0000 C   0  0  0  0  0  0  0  0  0  0  0  0
   -0.9347    0.4132    0.0000 C   0  0  0  0  0  0  0  0  0  0  0  0
   -1.6491   -1.6493    0.0000 C   0  0  0  0  0  0  0  0  0  0  0  0
   -2.3636   -2.0618    0.0000 C   0  0  0  0  0  0  0  0  0  0  0  0
   -2.3636   -2.8868    0.0000 C   0  0  0  0  0  0  0  0  0  0  0  0
   -1.6491   -3.2993    0.0000 C   0  0  0  0  0  0  0  0  0  0  0  0
   -0.9347   -2.8868    0.0000 C   0  0  0  0  0  0  0  0  0  0  0  0
   -0.9347   -2.0618    0.0000 C   0  0  0  0  0  0  0  0  0  0  0  0
   -0.1500   -0.6667    0.0000 N   0  0  0  0  0  0  0  0  0  0  0  0
    0.3349    0.0007    0.0000 C   0  0  0  0  0  0  0  0  0  0  0  0
   -0.1500    0.6681    0.0000 N   0  0  0  0  0  0  0  0  0  0  0  0
   -1.6491    4.1257    0.0000 C   0  0  0  0  0  0  0  0  0  0  0  0
   -0.9371    4.5368    0.0000 O   0  0  0  0  0  0  0  0  0  0  0  0
   -1.6491   -4.1243    0.0000 C   0  0  0  0  0  0  0  0  0  0  0  0
   -0.9347   -4.5368    0.0000 O   0  0  0  0  0  0  0  0  0  0  0  0
    1.5724   -0.7138    0.0000 C   0  0  0  0  0  0  0  0  0  0  0  0
    2.3974   -0.7138    0.0000 C   0  0  0  0  0  0  0  0  0  0  0  0
    2.8099    0.0007    0.0000 C   0  0  0  0  0  0  0  0  0  0  0  0
    2.3974    0.7152    0.0000 C   0  0  0  0  0  0  0  0  0  0  0  0
    1.1599    0.0007    0.0000 C   0  0  0  0  0  0  0  0  0  0  0  0
    1.5724    0.7152    0.0000 C   0  0  0  0  0  0  0  0  0  0  0  0
    3.3728    0.0007    0.0000 C   0  0  0  0  0  0  0  0  0  0  0  0
    3.7853    0.7152    0.0000 O   0  0  0  0  0  0  0  0  0  0  0  0
   -2.3612    4.5368    0.0000 O   0  0  0  0  0  0  0  0  0  0  0  0
   -3.7853    4.5368    0.0000 C   0  0  0  0  0  0  0  0  0  0  0  0
   -3.0733    4.1257    0.0000 C   0  0  0  0  0  0  0  0  0  0  0  0
   -2.3612   -4.5354    0.0000 O   0  0  0  0  0  0  0  0  0  0  0  0
   -3.7853   -4.5354    0.0000 C   0  0  0  0  0  0  0  0  0  0  0  0
   -3.0733   -4.1243    0.0000 C   0  0  0  0  0  0  0  0  0  0  0  0
  1  2  2  0      
  2  3  1  0      
  3  4  2  0      
  4  5  1  0      
  5  6  2  0      
  6  1  1  0      
  3  7  1  0      
  7  8  2  0      
  8  9  1  0      
  9 10  2  0      
 10 11  1  0      
 11 12  2  0      
 12  7  1  0      
 10 13  1  0      
 13 14  2  0      
 14 15  1  0      
 15 16  2  0      
 16 17  1  0      
 17 18  2  0      
 18 13  1  0      
 11 19  1  0      
 19 20  1  0      
 20 21  2  0      
 21 12  1  0      
  6 22  1  0      
 22 23  2  0      
 22 34  1  0      
 16 24  1  0      
 24 37  1  0      
 24 25  2  0      
 20 30  1  0      
 30 26  2  0      
 26 27  1  0      
 27 28  2  0      
 28 29  1  0      
 29 31  2  0      
 31 30  1  0      
 28 32  1  0      
 32 33  2  0      
 35 36  1  0      
 34 36  1  0      
 38 39  1  0      
 37 39  1  0      
M  END
